# Supplementary material for: Constitutive loss of DNMT3A causes morbid obesity through misregulation of adipogenesis
Source: eLife. 2022 May 30;11:e72359. doi: 10.7554/eLife.72359 (PMC9150890; doi:10.7554/eLife.72359)
Supplement: Figure 1—source data 1. [file elife-72359-fig1-data1.xlsx]

## Sheet: adipose_marker_6-clusters
name	p_val	avg_log2FC	pct.1	pct.2	p_val_adj	cluster	gene
Kdm6b	8.94407e-205	0.981596	0.971	0.76	1.02723e-200	1	Kdm6b
Anxa3	5.38102e-202	-1.66593	0.428	0.725	6.1801e-198	1	Anxa3
Pi16	9.45734e-191	-2.15431	0.358	0.71	1.08618e-186	1	Pi16
Fbn1	2.50977e-173	-1.21314	0.945	0.967	2.88247e-169	1	Fbn1
Tnfaip2	7.10897e-168	0.984663	0.964	0.82	8.16465e-164	1	Tnfaip2
Sema3c	3.05268e-164	-1.4248	0.483	0.718	3.50601e-160	1	Sema3c
Adamts4	1.47192e-163	1.37046	0.722	0.198	1.6905e-159	1	Adamts4
Col14a1	1.55299e-161	-1.37893	0.446	0.751	1.78361e-157	1	Col14a1
Mt1	2.65294e-157	1.07442	0.997	0.991	3.0469e-153	1	Mt1
Litaf	1.97418e-150	0.547457	0.973	0.78	2.26734e-146	1	Litaf
Igfbp6	1.72051e-149	-0.954958	0.986	0.995	1.97601e-145	1	Igfbp6
Cd55	3.11239e-148	-1.24582	0.785	0.891	3.57458e-144	1	Cd55
Fndc1	1.06824e-145	-1.20065	0.571	0.811	1.22687e-141	1	Fndc1
Ppp1r14b	3.3014e-143	-1.04597	0.353	0.707	3.79165e-139	1	Ppp1r14b
Btg2	1.27889e-140	1.00704	0.999	0.79	1.46881e-136	1	Btg2
Bag3	1.81788e-140	0.621691	0.874	0.624	2.08783e-136	1	Bag3
Sbsn	3.08218e-139	-1.29352	0.231	0.576	3.53988e-135	1	Sbsn
Mfap5	1.68776e-136	-0.929522	0.985	0.991	1.9384e-132	1	Mfap5
Ly6c1	7.10883e-135	-1.17671	0.535	0.799	8.16449e-131	1	Ly6c1
Slc10a6	1.45708e-129	0.804623	0.797	0.391	1.67345e-125	1	Slc10a6
Cd248	3.43282e-125	-0.995658	0.724	0.876	3.94259e-121	1	Cd248
Ccl11	9.82555e-123	0.90414	0.98	0.938	1.12846e-118	1	Ccl11
Arid5a	1.21213e-122	0.600668	0.789	0.398	1.39214e-118	1	Arid5a
Casp4	1.67765e-120	0.74722	0.957	0.66	1.92678e-116	1	Casp4
Ccnl1	5.65655e-120	0.58652	0.999	0.908	6.49655e-116	1	Ccnl1
Tpm3	5.18666e-117	0.523185	0.985	0.911	5.95687e-113	1	Tpm3
Efhd1	7.10883e-116	-0.856503	0.179	0.567	8.16449e-112	1	Efhd1
Ifi207	3.88794e-114	0.609544	0.994	0.894	4.4653e-110	1	Ifi207
Xbp1	1.66957e-113	0.560418	0.914	0.783	1.9175e-109	1	Xbp1
Igfbp5	1.38235e-112	-2.15167	0.309	0.574	1.58763e-108	1	Igfbp5
Ifi204	2.35521e-112	0.450408	0.999	0.983	2.70496e-108	1	Ifi204
Cebpb	5.1585e-112	0.770367	0.989	0.93	5.92453e-108	1	Cebpb
Irf1	3.0564e-110	1.02879	0.897	0.633	3.51028e-106	1	Irf1
Gcc1	3.80489e-110	0.57712	0.572	0.187	4.36992e-106	1	Gcc1
Osmr	3.54495e-109	0.599255	0.827	0.539	4.07138e-105	1	Osmr
Trib1	2.26494e-108	0.984964	0.872	0.484	2.60128e-104	1	Trib1
Ddx3x	1.13017e-107	0.517005	0.991	0.932	1.298e-103	1	Ddx3x
Dpp4	1.33599e-106	-0.937199	0.429	0.724	1.53438e-102	1	Dpp4
Nop58	2.27732e-105	0.627581	0.785	0.478	2.6155e-101	1	Nop58
Sbno2	1.46961e-101	0.850917	0.868	0.534	1.68785e-97	1	Sbno2
Mt2	2.93324e-101	0.956603	0.958	0.849	3.36883e-97	1	Mt2
Tmem158	1.18054e-100	-0.952702	0.163	0.515	1.35585e-96	1	Tmem158
Birc3	1.91549e-100	0.708556	0.75	0.402	2.19995e-96	1	Birc3
Ifrd1	3.61068e-100	0.828264	0.992	0.78	4.14687e-96	1	Ifrd1
Icam1	4.75199e-100	0.875417	0.9	0.551	5.45766e-96	1	Icam1
Ifi205	7.79477e-99	0.578474	0.996	0.961	8.9523e-95	1	Ifi205
Stat3	5.52715e-98	0.470052	0.947	0.751	6.34793e-94	1	Stat3
Cd34	1.11614e-97	-0.729871	1	1	1.28188e-93	1	Cd34
Slfn5	1.4603e-97	0.571583	0.986	0.922	1.67716e-93	1	Slfn5
Myd88	3.83664e-97	0.542975	0.817	0.492	4.40639e-93	1	Myd88
Pim1	8.41698e-97	0.784922	0.959	0.728	9.6669e-93	1	Pim1
Csnk1a1	2.06874e-95	0.348215	0.987	0.963	2.37595e-91	1	Csnk1a1
Id3	4.65151e-94	0.647104	0.997	0.949	5.34226e-90	1	Id3
Tmem100	7.34791e-93	-0.937097	0.277	0.622	8.43907e-89	1	Tmem100
H3f3b	1.64635e-92	0.465371	1	1	1.89083e-88	1	H3f3b
Txnrd1	2.96497e-92	0.557156	0.776	0.493	3.40527e-88	1	Txnrd1
Ddx5	3.16853e-92	0.316547	1	1	3.63906e-88	1	Ddx5
Nfkbiz	8.273e-92	0.719705	0.973	0.704	9.50154e-88	1	Nfkbiz
Myc	2.15582e-91	0.743759	0.893	0.564	2.47596e-87	1	Myc
Mcl1	2.38416e-91	0.588653	0.999	0.942	2.73821e-87	1	Mcl1
Clic4	3.45017e-91	0.549823	0.964	0.854	3.96251e-87	1	Clic4
Fn1	4.59417e-91	-0.99961	0.93	0.957	5.2764e-87	1	Fn1
Nov	3.08899e-90	-0.983818	0.107	0.461	3.5477e-86	1	Nov
Srsf5	4.14563e-88	0.364093	0.997	0.972	4.76126e-84	1	Srsf5
Hipk3	9.84501e-87	0.377649	0.834	0.604	1.1307e-82	1	Hipk3
Pcolce2	1.41074e-86	-0.777717	0.895	0.935	1.62023e-82	1	Pcolce2
Ldha	5.57714e-85	0.454959	0.834	0.699	6.40534e-81	1	Ldha
Ifi211	8.61504e-85	0.399678	0.938	0.822	9.89438e-81	1	Ifi211
Ptp4a1	2.06736e-83	0.451153	0.936	0.778	2.37436e-79	1	Ptp4a1
Tuba1c	5.91224e-83	0.477323	0.811	0.476	6.79021e-79	1	Tuba1c
Tsc22d2	9.65967e-83	0.561428	0.79	0.541	1.10941e-78	1	Tsc22d2
Smpd3	9.82892e-83	-1.07483	0.177	0.498	1.12885e-78	1	Smpd3
Fosl2	3.67013e-82	0.574616	0.893	0.686	4.21515e-78	1	Fosl2
Fstl1	4.74816e-82	-0.726506	0.992	0.998	5.45326e-78	1	Fstl1
Maff	7.11487e-82	0.719524	0.825	0.462	8.17143e-78	1	Maff
Sertad1	1.0294e-81	0.453072	0.886	0.594	1.18226e-77	1	Sertad1
Gas7	1.64089e-81	-0.848007	0.33	0.616	1.88457e-77	1	Gas7
Itpkc	3.1282e-81	0.887487	0.606	0.254	3.59274e-77	1	Itpkc
Tnfaip3	1.22776e-80	0.79272	0.799	0.379	1.41008e-76	1	Tnfaip3
Zfand5	3.61917e-80	0.463547	0.938	0.824	4.15662e-76	1	Zfand5
Irs2	4.54085e-78	0.656281	0.926	0.721	5.21516e-74	1	Irs2
Eps8	1.98417e-77	0.493696	0.659	0.422	2.27881e-73	1	Eps8
Tubb6	2.76425e-77	0.423523	0.801	0.55	3.17474e-73	1	Tubb6
Ripk1	7.44468e-77	0.442303	0.848	0.585	8.55022e-73	1	Ripk1
Ifi203	6.45048e-76	0.679168	0.752	0.617	7.40838e-72	1	Ifi203
Sod2	8.68188e-76	0.456483	0.706	0.521	9.97114e-72	1	Sod2
Dbn1	3.55393e-74	-0.654028	0.347	0.665	4.08169e-70	1	Dbn1
Atf4	8.46221e-74	0.396578	0.972	0.865	9.71885e-70	1	Atf4
Brd2	1.18776e-73	0.426559	0.879	0.704	1.36414e-69	1	Brd2
Hspa8	2.09614e-73	0.32889	1	0.998	2.40742e-69	1	Hspa8
Egr1	2.44283e-73	0.620768	1	0.965	2.8056e-69	1	Egr1
Opcml	3.16441e-73	-0.671453	0.221	0.582	3.63433e-69	1	Opcml
Gbp5	3.49431e-73	0.677127	0.454	0.134	4.01322e-69	1	Gbp5
Lsp1	4.47652e-73	-0.838447	0.71	0.874	5.14129e-69	1	Lsp1
Ppp1r2	7.04612e-72	0.532731	0.976	0.891	8.09247e-68	1	Ppp1r2
Klf9	3.37907e-71	0.516514	1	0.961	3.88086e-67	1	Klf9
Helz2	7.20766e-71	0.427706	0.525	0.233	8.278e-67	1	Helz2
Gadd45b	1.85601e-70	0.756878	0.831	0.503	2.13163e-66	1	Gadd45b
Nfkbia	2.44716e-70	0.560434	0.995	0.913	2.81057e-66	1	Nfkbia
Rhoj	7.70424e-70	0.387791	0.982	0.944	8.84832e-66	1	Rhoj
Rabgef1	1.87266e-69	0.347009	0.534	0.311	2.15075e-65	1	Rabgef1
Eif1	3.03693e-69	0.125925	1	1	3.48792e-65	1	Eif1
Pabpc1	1.18325e-68	0.253183	1	0.986	1.35896e-64	1	Pabpc1
Fosb	1.21838e-68	0.63776	0.992	0.935	1.39931e-64	1	Fosb
Zc3h12a	1.48834e-68	0.445691	0.612	0.323	1.70936e-64	1	Zc3h12a
Thbs1	1.60775e-68	1.25056	0.879	0.533	1.84651e-64	1	Thbs1
Socs3	3.80753e-68	0.657416	1	0.899	4.37295e-64	1	Socs3
Slco3a1	6.78311e-68	-0.63757	0.224	0.538	7.7904e-64	1	Slco3a1
Irgm1	7.74473e-67	0.547365	0.436	0.251	8.89482e-63	1	Irgm1
Qpct	9.00896e-67	-0.638896	0.63	0.811	1.03468e-62	1	Qpct
Midn	6.94448e-66	0.452118	0.844	0.585	7.97574e-62	1	Midn
Mafk	6.51678e-65	0.361983	0.7	0.461	7.48452e-61	1	Mafk
Limch1	1.28597e-64	-0.626625	0.122	0.466	1.47693e-60	1	Limch1
Sfrp4	5.83772e-64	-0.886284	0.09	0.418	6.70462e-60	1	Sfrp4
Etf1	6.03712e-64	0.316969	0.803	0.627	6.93363e-60	1	Etf1
Ets2	2.16439e-63	0.373951	0.597	0.337	2.4858e-59	1	Ets2
Mustn1	2.85231e-63	-0.647823	0.374	0.682	3.27587e-59	1	Mustn1
Map3k8	3.1637e-63	0.393598	0.732	0.508	3.63351e-59	1	Map3k8
Coq10b	4.89854e-63	0.360524	0.83	0.583	5.62597e-59	1	Coq10b
Thbd	7.84676e-63	0.545472	0.828	0.803	9.012e-59	1	Thbd
Eif1a	2.27615e-62	0.369696	0.845	0.617	2.61415e-58	1	Eif1a
Rab20	9.6051e-62	0.462679	0.507	0.142	1.10315e-57	1	Rab20
Ly6a	1.65809e-61	-0.638664	1	1	1.90431e-57	1	Ly6a
Jund	1.86348e-61	0.475617	1	1	2.14021e-57	1	Jund
Il6	4.93825e-61	1.31024	0.699	0.249	5.67157e-57	1	Il6
Gsn	8.25709e-61	0.307867	1	1	9.48326e-57	1	Gsn
Hsp90aa1	8.46733e-61	0.316422	0.98	0.953	9.72473e-57	1	Hsp90aa1
Sfrp2	2.17697e-60	-0.925154	0.455	0.66	2.50025e-56	1	Sfrp2
Rela	4.12041e-60	0.326627	0.734	0.522	4.73229e-56	1	Rela
Steap4	4.3834e-60	0.780626	0.863	0.449	5.03434e-56	1	Steap4
Fam49a	1.6352e-59	0.343357	0.672	0.412	1.87803e-55	1	Fam49a
Ppp1r15a	2.17287e-59	0.427493	0.948	0.774	2.49554e-55	1	Ppp1r15a
Uqcc2	3.2006e-59	-0.54116	0.41	0.703	3.67588e-55	1	Uqcc2
Junb	5.01552e-59	0.596317	1	0.949	5.76033e-55	1	Junb
Cebpd	5.77283e-59	0.623972	0.999	0.952	6.6301e-55	1	Cebpd
Lmna	1.43196e-58	0.520857	0.911	0.793	1.64461e-54	1	Lmna
Nfib	1.50592e-58	0.269559	0.997	0.977	1.72955e-54	1	Nfib
Psap	4.77931e-58	0.282814	1	1	5.48903e-54	1	Psap
Il6st	9.36392e-58	0.248222	0.972	0.917	1.07545e-53	1	Il6st
Tgoln1	2.00824e-57	0.306979	0.916	0.807	2.30646e-53	1	Tgoln1
Tfpi2	2.52444e-57	0.566964	0.334	0.225	2.89932e-53	1	Tfpi2
Scara3	2.59503e-57	-0.602789	0.515	0.75	2.9804e-53	1	Scara3
Sdc4	3.18331e-57	0.458862	0.764	0.701	3.65603e-53	1	Sdc4
Zc3hav1	2.2721e-56	0.322079	0.79	0.654	2.60951e-52	1	Zc3hav1
Selenop	3.24478e-56	0.295653	1	0.996	3.72663e-52	1	Selenop
Tnfrsf1a	4.27144e-55	0.298565	0.84	0.706	4.90575e-51	1	Tnfrsf1a
Jmjd1c	4.88298e-55	0.365682	0.884	0.747	5.6081e-51	1	Jmjd1c
Il17ra	5.83214e-55	0.381277	0.651	0.479	6.69821e-51	1	Il17ra
Aspn	1.13985e-54	-0.798916	0.107	0.394	1.30912e-50	1	Aspn
Kctd10	1.27529e-54	0.279803	0.619	0.412	1.46468e-50	1	Kctd10
Adamts1	2.58616e-54	0.681286	0.822	0.653	2.9702e-50	1	Adamts1
Wsb1	2.92974e-54	0.329476	0.84	0.696	3.36481e-50	1	Wsb1
Gbp2	3.41007e-54	0.531287	0.54	0.376	3.91646e-50	1	Gbp2
Bcl3	4.38301e-54	0.361148	0.576	0.295	5.03389e-50	1	Bcl3
Alkal2	5.3349e-54	0.805685	0.682	0.3	6.12713e-50	1	Alkal2
Map4k4	1.76651e-53	0.321392	0.928	0.796	2.02883e-49	1	Map4k4
Plpp3	1.8504e-53	-0.647107	0.999	0.995	2.12518e-49	1	Plpp3
Cavin3	2.17162e-53	-0.555902	0.746	0.887	2.49411e-49	1	Cavin3
Ppp1r15b	6.73368e-53	0.352819	0.723	0.538	7.73364e-49	1	Ppp1r15b
Nfat5	1.08146e-52	0.317129	0.854	0.719	1.24206e-48	1	Nfat5
Cp	1.25654e-52	0.5126	0.825	0.556	1.44314e-48	1	Cp
Cstf3	2.03543e-52	0.380918	0.446	0.231	2.33769e-48	1	Cstf3
Ildr2	2.09147e-52	-0.59709	0.1	0.415	2.40205e-48	1	Ildr2
Med13l	3.37959e-52	0.286912	0.817	0.64	3.88145e-48	1	Med13l
Prdx5	1.13944e-51	-0.556242	0.732	0.875	1.30865e-47	1	Prdx5
Phlda1	1.28766e-51	0.705373	0.888	0.739	1.47888e-47	1	Phlda1
Srxn1	5.7611e-51	0.517161	0.605	0.346	6.61662e-47	1	Srxn1
Tagln2	1.40281e-50	0.34069	0.907	0.796	1.61113e-46	1	Tagln2
Basp1	1.68692e-50	-0.665321	0.352	0.6	1.93743e-46	1	Basp1
Fam102b	2.17076e-50	0.297864	0.966	0.916	2.49312e-46	1	Fam102b
Csrnp1	2.34816e-50	0.524353	0.803	0.413	2.69687e-46	1	Csrnp1
Lgals1	2.44782e-50	-0.542496	0.956	0.983	2.81132e-46	1	Lgals1
Top1	2.45924e-50	0.2822	0.931	0.84	2.82443e-46	1	Top1
Frmd6	3.32069e-50	0.353764	0.934	0.841	3.81381e-46	1	Frmd6
Wt1	6.35992e-50	0.512997	0.779	0.535	7.30436e-46	1	Wt1
Tgfbr2	7.99613e-50	-0.557584	0.897	0.938	9.18355e-46	1	Tgfbr2
Rhob	8.18738e-50	0.504442	0.977	0.913	9.40321e-46	1	Rhob
Rassf1	1.99844e-49	0.320471	0.787	0.631	2.29521e-45	1	Rassf1
Eif4a1	2.95081e-49	0.188612	0.981	0.966	3.389e-45	1	Eif4a1
Snu13	3.34708e-49	0.234615	0.873	0.786	3.84412e-45	1	Snu13
Snx10	4.21485e-49	0.308019	0.562	0.415	4.84076e-45	1	Snx10
Dcn	4.95421e-49	0.167067	1	1	5.68991e-45	1	Dcn
Zfp36	2.35643e-48	0.600753	1	0.932	2.70636e-44	1	Zfp36
Pnp	4.19733e-48	0.483637	0.968	0.923	4.82064e-44	1	Pnp
Gpx3	7.12931e-48	0.601137	0.991	0.846	8.18801e-44	1	Gpx3
Tpt1	8.61759e-48	-0.0276621	1	1	9.8973e-44	1	Tpt1
Fam198b	1.25174e-47	0.47965	0.884	0.571	1.43762e-43	1	Fam198b
Boc	1.35257e-47	0.306682	0.578	0.343	1.55343e-43	1	Boc
Eloc	1.6872e-47	0.24828	0.775	0.678	1.93775e-43	1	Eloc
Pcf11	4.21415e-47	0.31218	0.75	0.57	4.83996e-43	1	Pcf11
Fez1	5.80876e-47	-0.454853	0.196	0.493	6.67136e-43	1	Fez1
Mgll	5.9015e-47	-0.538513	0.061	0.394	6.77787e-43	1	Mgll
Tra2b	9.20798e-47	0.29715	0.928	0.828	1.05754e-42	1	Tra2b
Tns2	1.26726e-46	0.265164	0.806	0.67	1.45545e-42	1	Tns2
Gja1	1.37593e-46	0.32811	0.939	0.867	1.58026e-42	1	Gja1
Fth1	1.78912e-46	0.105134	1	1	2.05481e-42	1	Fth1
Ywhaz	3.48218e-46	0.204668	0.959	0.94	3.99928e-42	1	Ywhaz
Lurap1l	4.88018e-46	-0.494358	0.123	0.427	5.60489e-42	1	Lurap1l
Vcan	4.88271e-46	-0.5624	0.294	0.554	5.6078e-42	1	Vcan
Emp3	6.39193e-46	-0.523925	0.84	0.927	7.34113e-42	1	Emp3
Ms4a4d	9.09625e-46	0.318941	0.954	0.827	1.0447e-41	1	Ms4a4d
Sf1	9.30252e-46	0.245975	0.732	0.588	1.06839e-41	1	Sf1
C1s1	1.45025e-45	0.162813	1	0.999	1.66561e-41	1	C1s1
Rsrp1	1.79325e-45	-0.570381	0.804	0.908	2.05955e-41	1	Rsrp1
Lox	1.9653e-45	0.518515	0.861	0.631	2.25715e-41	1	Lox
Lamp2	5.12124e-45	0.164522	0.997	0.994	5.88175e-41	1	Lamp2
Arnt	1.08919e-44	0.255609	0.714	0.563	1.25093e-40	1	Arnt
Loxl1	1.17855e-44	-0.512388	0.828	0.926	1.35356e-40	1	Loxl1
Abca8a	3.0485e-44	0.387207	0.977	0.796	3.5012e-40	1	Abca8a
Odc1	3.56717e-44	0.499287	0.479	0.306	4.09689e-40	1	Odc1
BC005537	6.89608e-44	0.257875	0.912	0.793	7.92015e-40	1	BC005537
Celf2	8.84773e-44	0.236731	1	0.987	1.01616e-39	1	Celf2
Rnf122	1.94172e-43	0.418534	0.609	0.291	2.23006e-39	1	Rnf122
Sqstm1	2.24309e-43	0.2767	0.925	0.876	2.57618e-39	1	Sqstm1
Ecm1	3.60151e-43	-0.532107	0.938	0.975	4.13634e-39	1	Ecm1
Ddah2	5.15202e-43	-0.442131	0.795	0.911	5.91709e-39	1	Ddah2
Glul	2.72789e-42	0.389319	0.943	0.905	3.13298e-38	1	Glul
Plekhf1	2.86175e-42	0.289367	0.564	0.358	3.28673e-38	1	Plekhf1
Trio	2.94935e-42	-0.497216	0.438	0.65	3.38733e-38	1	Trio
Islr2	3.96227e-42	-0.503505	0.057	0.392	4.55066e-38	1	Islr2
Dennd4a	2.10645e-41	0.305809	0.463	0.268	2.41925e-37	1	Dennd4a
Rps11	5.01685e-41	-0.306077	1	1	5.76185e-37	1	Rps11
Ggt5	9.6e-41	0.468617	0.968	0.676	1.10256e-36	1	Ggt5
Rbms1	1.02567e-40	0.188074	0.996	0.983	1.17798e-36	1	Rbms1
Scn7a	1.21592e-40	0.257278	0.977	0.884	1.39648e-36	1	Scn7a
Sde2	1.43428e-40	0.236048	0.565	0.404	1.64727e-36	1	Sde2
Aldh1a3	1.50191e-40	-0.603755	0.537	0.754	1.72494e-36	1	Aldh1a3
Gngt2	1.63447e-40	-0.483126	0.49	0.717	1.87719e-36	1	Gngt2
Peli1	2.38335e-40	0.317412	0.665	0.46	2.73728e-36	1	Peli1
Ackr3	3.11773e-40	-0.738023	0.719	0.835	3.58072e-36	1	Ackr3
Emilin2	3.40904e-40	-0.493495	0.738	0.85	3.91528e-36	1	Emilin2
Adamtsl4	3.92542e-40	-0.470182	0.097	0.396	4.50834e-36	1	Adamtsl4
Ier5	7.3689e-40	0.540931	0.91	0.678	8.46319e-36	1	Ier5
Axl	1.00417e-39	-0.507608	0.93	0.959	1.15329e-35	1	Axl
Anxa2	1.06159e-39	-0.536932	0.756	0.872	1.21924e-35	1	Anxa2
Itga5	3.00926e-39	0.436118	0.648	0.402	3.45614e-35	1	Itga5
Gpm6b	3.62478e-39	0.348441	0.919	0.724	4.16306e-35	1	Gpm6b
Ndrg2	3.86316e-39	0.331453	0.794	0.529	4.43683e-35	1	Ndrg2
Dpep1	5.67025e-39	0.300676	1	0.991	6.51228e-35	1	Dpep1
Daglb	6.38378e-39	-0.552944	0.191	0.406	7.33178e-35	1	Daglb
Marcks	6.38761e-39	-0.566544	0.975	0.987	7.33617e-35	1	Marcks
Klf3	6.93119e-39	-0.515483	0.639	0.817	7.96047e-35	1	Klf3
Snx21	8.14478e-39	-0.381044	0.203	0.49	9.35428e-35	1	Snx21
Cyth3	8.41451e-39	0.280671	0.818	0.68	9.66406e-35	1	Cyth3
Arl5b	9.37635e-39	0.297072	0.517	0.373	1.07687e-34	1	Arl5b
Nfil3	1.42134e-38	0.3385	0.63	0.404	1.63241e-34	1	Nfil3
Arih1	1.65215e-38	0.263966	0.667	0.53	1.89749e-34	1	Arih1
Eef1b2	1.75442e-38	-0.367008	0.99	0.997	2.01495e-34	1	Eef1b2
Fam76a	2.04309e-38	0.236816	0.67	0.518	2.34649e-34	1	Fam76a
Crk	2.41465e-38	0.210972	0.742	0.634	2.77322e-34	1	Crk
Spred1	2.88237e-38	0.24541	0.714	0.635	3.3104e-34	1	Spred1
Egr2	3.3641e-38	0.352571	0.404	0.188	3.86367e-34	1	Egr2
Col4a1	5.1142e-38	0.460611	0.999	0.918	5.87366e-34	1	Col4a1
Ltbp4	6.2079e-38	0.2798	0.996	0.957	7.12977e-34	1	Ltbp4
Filip1l	1.3689e-37	0.309524	0.64	0.455	1.57218e-33	1	Filip1l
Slc3a2	2.47321e-37	0.274157	0.774	0.646	2.84048e-33	1	Slc3a2
Plac8	3.92923e-37	-0.613615	0.601	0.777	4.51272e-33	1	Plac8
Fst	4.04545e-37	0.579872	0.947	0.765	4.6462e-33	1	Fst
Tmem88	4.34774e-37	0.363665	0.416	0.147	4.99337e-33	1	Tmem88
Serinc3	7.38093e-37	0.172324	0.936	0.892	8.477e-33	1	Serinc3
Slc25a25	1.14079e-36	0.333964	0.394	0.162	1.3102e-32	1	Slc25a25
Zbtb20	1.35221e-36	0.135059	1	1	1.55301e-32	1	Zbtb20
Bach1	1.8224e-36	0.272135	0.662	0.548	2.09303e-32	1	Bach1
Noct	3.02871e-36	0.393602	0.457	0.197	3.47848e-32	1	Noct
Uchl1	4.30483e-36	-0.461154	0.188	0.434	4.9441e-32	1	Uchl1
Pcsk6	6.80597e-36	-0.554321	0.504	0.702	7.81665e-32	1	Pcsk6
Nedd4	8.77275e-36	0.0825279	1	1	1.00755e-31	1	Nedd4
Gm12840	1.4199e-35	0.625688	0.897	0.637	1.63076e-31	1	Gm12840
Dnaja1	1.51779e-35	0.225435	0.971	0.943	1.74318e-31	1	Dnaja1
Btg1	2.37657e-35	0.361121	0.956	0.86	2.72949e-31	1	Btg1
Skil	2.59474e-35	0.310859	0.705	0.525	2.98006e-31	1	Skil
Cadm3	5.8315e-35	-0.414928	0.226	0.491	6.69748e-31	1	Cadm3
Slc43a3	6.9026e-35	0.179225	0.996	0.989	7.92764e-31	1	Slc43a3
Vcam1	7.59413e-35	0.45298	0.848	0.551	8.72185e-31	1	Vcam1
Bcl10	8.6312e-35	0.245584	0.72	0.56	9.91294e-31	1	Bcl10
Kif2a	1.03657e-34	-0.425701	0.414	0.654	1.1905e-30	1	Kif2a
Rps7	1.13879e-34	-0.283411	1	1	1.3079e-30	1	Rps7
Hnrnpu	1.29531e-34	0.212578	0.959	0.912	1.48766e-30	1	Hnrnpu
Tek	2.5597e-34	-0.446252	0.553	0.727	2.93982e-30	1	Tek
Chst15	3.12674e-34	0.277169	0.474	0.286	3.59107e-30	1	Chst15
Por	4.03564e-34	0.221264	0.657	0.498	4.63493e-30	1	Por
Hnrnpa2b1	5.61878e-34	0.202207	0.99	0.952	6.45317e-30	1	Hnrnpa2b1
Tcf21	7.64379e-34	0.387219	0.726	0.583	8.77889e-30	1	Tcf21
Chchd2	7.88499e-34	0.097339	0.994	0.997	9.05591e-30	1	Chchd2
Crispld2	9.63235e-34	0.491799	0.874	0.545	1.10627e-29	1	Crispld2
Hspa5	9.81834e-34	0.215514	0.973	0.942	1.12764e-29	1	Hspa5
Lifr	1.32281e-33	0.34915	0.72	0.487	1.51925e-29	1	Lifr
Car8	1.44427e-33	-0.460913	0.145	0.394	1.65875e-29	1	Car8
Ahnak2	1.45879e-33	-0.449606	0.771	0.899	1.67542e-29	1	Ahnak2
Bicc1	1.6447e-33	0.173431	0.975	0.928	1.88894e-29	1	Bicc1
Triobp	1.96328e-33	-0.369983	0.321	0.561	2.25483e-29	1	Triobp
Cndp2	2.09786e-33	0.213876	0.666	0.554	2.40939e-29	1	Cndp2
Rpl15	2.2838e-33	-0.29752	1	1	2.62295e-29	1	Rpl15
Tnrc6b	2.77642e-33	0.182639	0.901	0.82	3.18872e-29	1	Tnrc6b
Tubb4b	3.36306e-33	0.407571	0.673	0.563	3.86248e-29	1	Tubb4b
Sik1	3.68068e-33	0.292058	0.553	0.367	4.22726e-29	1	Sik1
Ssh2	4.0085e-33	0.250375	0.868	0.723	4.60376e-29	1	Ssh2
Ube2d3	4.71275e-33	0.139664	0.986	0.976	5.41259e-29	1	Ube2d3
Hk2	5.03466e-33	0.576721	0.715	0.432	5.78231e-29	1	Hk2
Nfia	6.16496e-33	0.158828	0.991	0.972	7.08046e-29	1	Nfia
Fus	6.34599e-33	0.159894	0.985	0.967	7.28837e-29	1	Fus
Hspg2	8.58547e-33	0.276017	0.97	0.901	9.86041e-29	1	Hspg2
Ptges	1.08132e-32	0.241976	0.661	0.554	1.2419e-28	1	Ptges
Zfp385a	1.1652e-32	-0.418155	0.421	0.645	1.33823e-28	1	Zfp385a
Dapk1	1.4046e-32	0.202339	0.929	0.86	1.61319e-28	1	Dapk1
Dnajc3	1.75386e-32	0.175609	0.893	0.847	2.01431e-28	1	Dnajc3
Lims2	2.47111e-32	-0.379375	0.39	0.624	2.83807e-28	1	Lims2
Tnfaip6	2.53086e-32	0.504644	0.978	0.833	2.9067e-28	1	Tnfaip6
Flnc	3.61539e-32	-0.469657	0.217	0.445	4.15228e-28	1	Flnc
Nfkb1	4.13096e-32	0.270089	0.783	0.655	4.7444e-28	1	Nfkb1
Ifitm3	4.22746e-32	0.131009	1	0.999	4.85524e-28	1	Ifitm3
Crip1	4.83299e-32	-0.636695	0.936	0.963	5.55069e-28	1	Crip1
Nid2	5.91662e-32	0.27813	0.565	0.332	6.79523e-28	1	Nid2
Col15a1	6.10698e-32	0.510955	0.816	0.452	7.01387e-28	1	Col15a1
Mrc2	1.08615e-31	0.221502	0.783	0.637	1.24744e-27	1	Mrc2
Plekha6	1.20712e-31	0.304368	0.64	0.368	1.38638e-27	1	Plekha6
Ackr2	1.46801e-31	-0.389983	0.164	0.43	1.68601e-27	1	Ackr2
Rab6a	1.481e-31	0.187601	0.804	0.723	1.70092e-27	1	Rab6a
Zfp36l1	1.59129e-31	0.25356	0.997	0.985	1.82759e-27	1	Zfp36l1
Dnajb1	1.65387e-31	0.559667	0.647	0.459	1.89947e-27	1	Dnajb1
Pde12	1.71275e-31	0.284369	0.463	0.241	1.9671e-27	1	Pde12
Aoc3	1.82744e-31	0.316627	0.663	0.373	2.09882e-27	1	Aoc3
Epas1	2.38097e-31	0.263085	0.558	0.385	2.73455e-27	1	Epas1
1810037I17Rik	2.9567e-31	0.147799	0.905	0.833	3.39577e-27	1	1810037I17Rik
Dact2	3.29405e-31	-0.61596	0.014	0.299	3.78321e-27	1	Dact2
Slc16a2	3.6078e-31	0.246689	0.717	0.539	4.14355e-27	1	Slc16a2
Galnt16	3.92451e-31	-0.374916	0.255	0.502	4.5073e-27	1	Galnt16
Myof	4.60527e-31	-0.373799	0.341	0.572	5.28915e-27	1	Myof
Thsd7a	7.73556e-31	0.316518	0.748	0.549	8.88429e-27	1	Thsd7a
Ier2	8.34603e-31	0.383296	0.976	0.865	9.58542e-27	1	Ier2
Slit3	9.73488e-31	0.183702	0.975	0.943	1.11805e-26	1	Slit3
Arl13b	1.0288e-30	0.264885	0.648	0.48	1.18157e-26	1	Arl13b
Deptor	1.15155e-30	0.254566	0.482	0.288	1.32255e-26	1	Deptor
Prkx	1.90108e-30	0.204271	0.498	0.341	2.18339e-26	1	Prkx
Fndc3b	2.08363e-30	0.17436	0.916	0.862	2.39305e-26	1	Fndc3b
Cyp1b1	2.10167e-30	0.420383	0.761	0.455	2.41377e-26	1	Cyp1b1
Islr	2.15715e-30	-0.414415	0.92	0.972	2.47749e-26	1	Islr
Dnajb4	2.21419e-30	0.290176	0.68	0.525	2.543e-26	1	Dnajb4
Usp16	2.41748e-30	0.206733	0.595	0.453	2.77648e-26	1	Usp16
Dapk2	2.44888e-30	0.240592	0.479	0.259	2.81254e-26	1	Dapk2
Vmp1	3.08134e-30	0.281617	0.686	0.515	3.53891e-26	1	Vmp1
Samd4b	4.71111e-30	0.188638	0.783	0.668	5.41071e-26	1	Samd4b
Coq8b	5.25568e-30	0.260688	0.389	0.198	6.03615e-26	1	Coq8b
Hnrnph1	5.47171e-30	0.19035	0.896	0.835	6.28426e-26	1	Hnrnph1
Olfml2b	7.11043e-30	-0.408001	0.404	0.638	8.16632e-26	1	Olfml2b
Dusp1	1.01599e-29	0.379611	0.99	0.938	1.16687e-25	1	Dusp1
Gstt1	1.13216e-29	0.205425	0.935	0.825	1.30029e-25	1	Gstt1
Tcp11l2	1.20678e-29	0.174503	0.704	0.582	1.38598e-25	1	Tcp11l2
Lpl	1.32997e-29	0.511766	0.999	0.953	1.52747e-25	1	Lpl
Fgf10	1.74743e-29	0.27667	0.517	0.306	2.00692e-25	1	Fgf10
Errfi1	2.14637e-29	0.333557	0.985	0.922	2.46511e-25	1	Errfi1
Sgk1	2.29882e-29	0.487425	0.809	0.615	2.64019e-25	1	Sgk1
Tmed5	2.69518e-29	0.231679	0.728	0.643	3.09541e-25	1	Tmed5
Nav1	2.95507e-29	0.162129	0.996	0.982	3.3939e-25	1	Nav1
Nab1	4.17586e-29	0.197502	0.54	0.358	4.79597e-25	1	Nab1
Tns1	4.61337e-29	-0.404493	0.459	0.663	5.29846e-25	1	Tns1
Cd302	5.24375e-29	0.178966	0.987	0.977	6.02244e-25	1	Cd302
Atp1a2	5.27941e-29	0.365637	0.717	0.401	6.06341e-25	1	Atp1a2
Chic2	5.56294e-29	0.142511	0.889	0.816	6.38904e-25	1	Chic2
S100a10	5.62771e-29	-0.480387	0.996	0.996	6.46342e-25	1	S100a10
Adam33	5.65253e-29	-0.398079	0.217	0.449	6.49193e-25	1	Adam33
Sparcl1	6.15051e-29	0.442971	0.995	0.8	7.06386e-25	1	Sparcl1
Lima1	6.63665e-29	0.173943	0.956	0.945	7.62219e-25	1	Lima1
Tpst1	6.83209e-29	0.189774	0.892	0.792	7.84666e-25	1	Tpst1
Sash1	1.62506e-28	0.168703	0.933	0.889	1.86638e-24	1	Sash1
Pdlim2	1.6535e-28	-0.40879	0.56	0.771	1.89904e-24	1	Pdlim2
Plod2	2.26886e-28	0.226774	0.679	0.557	2.60578e-24	1	Plod2
H6pd	2.60485e-28	0.272777	0.712	0.495	2.99167e-24	1	H6pd
Golph3	2.85892e-28	0.180278	0.638	0.534	3.28347e-24	1	Golph3
Kctd12	3.05986e-28	0.276358	0.667	0.479	3.51425e-24	1	Kctd12
Slco2b1	3.76183e-28	0.326998	0.635	0.353	4.32046e-24	1	Slco2b1
Atf3	4.28444e-28	0.399817	0.982	0.839	4.92068e-24	1	Atf3
Lrp1	4.37343e-28	0.106732	1	0.997	5.02289e-24	1	Lrp1
Adh1	6.67816e-28	0.354373	0.887	0.676	7.66986e-24	1	Adh1
Fgf2	7.15739e-28	-0.355044	0.17	0.425	8.22026e-24	1	Fgf2
mt-Co1	7.18709e-28	0.0385417	1	1	8.25437e-24	1	mt-Co1
Rnf19b	7.46106e-28	0.264686	0.404	0.258	8.56902e-24	1	Rnf19b
Pbx1	7.54259e-28	0.155281	0.972	0.941	8.66266e-24	1	Pbx1
Med13	8.92463e-28	0.174867	0.717	0.593	1.02499e-23	1	Med13
Atox1	9.24388e-28	-0.385069	0.784	0.877	1.06166e-23	1	Atox1
Drap1	1.14621e-27	0.212535	0.964	0.918	1.31642e-23	1	Drap1
Tra2a	1.49979e-27	0.196804	0.884	0.819	1.7225e-23	1	Tra2a
Cxcl1	1.58113e-27	0.614275	0.944	0.657	1.81593e-23	1	Cxcl1
Cebpa	1.59869e-27	0.253247	0.403	0.251	1.83609e-23	1	Cebpa
Ccnt1	1.65014e-27	0.189595	0.62	0.474	1.89518e-23	1	Ccnt1
Rlim	1.74568e-27	0.218605	0.614	0.442	2.00491e-23	1	Rlim
Rpl13	2.04957e-27	-0.252983	1	1	2.35393e-23	1	Rpl13
Senp2	2.42681e-27	0.198618	0.44	0.335	2.78719e-23	1	Senp2
Acvr2a	3.50631e-27	0.2305	0.668	0.506	4.02699e-23	1	Acvr2a
Gm15675	3.98518e-27	-0.442807	0.076	0.338	4.57698e-23	1	Gm15675
Rhoa	4.18255e-27	-0.366505	0.98	0.991	4.80366e-23	1	Rhoa
Tiparp	4.25879e-27	0.342685	0.788	0.577	4.89122e-23	1	Tiparp
Gas1	4.67204e-27	0.434759	0.931	0.866	5.36583e-23	1	Gas1
Mbnl1	1.26379e-26	0.143909	0.971	0.94	1.45146e-22	1	Mbnl1
S100a13	1.6782e-26	-0.372315	0.945	0.98	1.92741e-22	1	S100a13
Erf	1.71946e-26	0.223396	0.421	0.337	1.9748e-22	1	Erf
Etv3	2.01073e-26	0.210456	0.405	0.275	2.30933e-22	1	Etv3
Nnmt	2.72251e-26	0.327849	0.456	0.408	3.1268e-22	1	Nnmt
Map2k3	3.06773e-26	0.176325	0.482	0.374	3.52329e-22	1	Map2k3
Lrp6	3.15009e-26	0.193349	0.854	0.723	3.61788e-22	1	Lrp6
Nhsl1	3.29003e-26	-0.345199	0.273	0.488	3.7786e-22	1	Nhsl1
Sfpq	3.36069e-26	0.158573	0.856	0.798	3.85975e-22	1	Sfpq
Tex2	3.69341e-26	0.195276	0.407	0.244	4.24189e-22	1	Tex2
Crebbp	3.85615e-26	0.141357	0.82	0.756	4.42879e-22	1	Crebbp
Arf4	3.88915e-26	0.141404	0.97	0.957	4.46669e-22	1	Arf4
Prdx2	4.10978e-26	-0.348246	0.742	0.87	4.72008e-22	1	Prdx2
Sat1	4.45306e-26	0.306039	0.953	0.922	5.11434e-22	1	Sat1
Gstm2	5.9307e-26	0.185557	0.895	0.79	6.81141e-22	1	Gstm2
Alas1	6.50158e-26	0.200242	0.483	0.386	7.46706e-22	1	Alas1
Nmb	6.5289e-26	0.312457	0.4	0.227	7.49844e-22	1	Nmb
Dact1	6.59928e-26	-0.543154	0.49	0.672	7.57927e-22	1	Dact1
Hsp90ab1	6.696e-26	-0.365435	0.996	0.996	7.69035e-22	1	Hsp90ab1
Nptn	7.95803e-26	-0.374371	0.798	0.892	9.13979e-22	1	Nptn
Extl3	9.14822e-26	0.172189	0.517	0.369	1.05067e-21	1	Extl3
1700019D03Rik	9.75515e-26	-0.343069	0.189	0.439	1.12038e-21	1	1700019D03Rik
Pdgfra	1.11964e-25	0.201418	0.992	0.978	1.28591e-21	1	Pdgfra
Wnt2	1.23071e-25	-0.480784	0.041	0.309	1.41347e-21	1	Wnt2
Sema3d	1.54475e-25	-0.385207	0.107	0.369	1.77415e-21	1	Sema3d
Penk	1.63638e-25	0.333995	0.926	0.725	1.87938e-21	1	Penk
Chst1	1.68251e-25	-0.422181	0.065	0.342	1.93236e-21	1	Chst1
Tmem123	2.0083e-25	0.178036	0.529	0.456	2.30653e-21	1	Tmem123
Pnrc1	2.06426e-25	0.151488	0.981	0.947	2.37081e-21	1	Pnrc1
Metrnl	2.81527e-25	-0.502323	0.708	0.82	3.23334e-21	1	Metrnl
Inmt	3.17151e-25	0.607522	0.99	0.663	3.64248e-21	1	Inmt
Anxa1	3.71176e-25	0.124654	0.996	0.996	4.26295e-21	1	Anxa1
Mbnl2	3.74966e-25	0.144513	0.902	0.823	4.30649e-21	1	Mbnl2
Svep1	4.08226e-25	0.281149	0.911	0.674	4.68847e-21	1	Svep1
Tmeff2	4.12954e-25	0.217097	0.922	0.824	4.74277e-21	1	Tmeff2
Cygb	5.49886e-25	0.285156	0.992	0.863	6.31544e-21	1	Cygb
Smoc2	5.60459e-25	0.485393	0.887	0.641	6.43688e-21	1	Smoc2
Prkar2a	6.26519e-25	0.175995	0.56	0.449	7.19557e-21	1	Prkar2a
Rras2	7.38185e-25	-0.39402	0.119	0.353	8.47806e-21	1	Rras2
Efemp1	1.07604e-24	-0.398278	0.992	0.996	1.23583e-20	1	Efemp1
Dusp8	1.3317e-24	0.212684	0.402	0.25	1.52945e-20	1	Dusp8
Gnpnat1	1.56745e-24	-0.335286	0.264	0.471	1.80021e-20	1	Gnpnat1
Podn	1.70112e-24	0.278375	0.71	0.47	1.95373e-20	1	Podn
Itpripl2	2.21692e-24	0.195664	0.661	0.535	2.54613e-20	1	Itpripl2
Clec2d	2.3814e-24	-0.468847	0.637	0.769	2.73504e-20	1	Clec2d
Aff1	2.47774e-24	0.171122	0.498	0.397	2.84569e-20	1	Aff1
Hnrnpf	2.583e-24	0.099882	0.966	0.932	2.96657e-20	1	Hnrnpf
Colec12	2.82872e-24	0.16977	0.848	0.735	3.24879e-20	1	Colec12
Spry1	3.41051e-24	0.371304	0.612	0.385	3.91697e-20	1	Spry1
Trafd1	3.7033e-24	0.158311	0.56	0.439	4.25324e-20	1	Trafd1
Ptpn12	4.18103e-24	0.167792	0.537	0.416	4.80192e-20	1	Ptpn12
Ythdc1	4.34203e-24	0.173562	0.755	0.662	4.98682e-20	1	Ythdc1
Cpeb4	4.78909e-24	0.172108	0.447	0.318	5.50027e-20	1	Cpeb4
Nufip2	4.91317e-24	0.172895	0.706	0.632	5.64277e-20	1	Nufip2
Iigp1	5.08479e-24	0.507157	0.36	0.278	5.83988e-20	1	Iigp1
Col5a3	6.34843e-24	0.253683	0.971	0.897	7.29117e-20	1	Col5a3
Serpinb6a	8.94985e-24	-0.36118	0.992	0.995	1.02789e-19	1	Serpinb6a
Rbm3	9.63265e-24	0.0616829	0.986	0.984	1.10631e-19	1	Rbm3
Rps10	1.07381e-23	-0.23188	1	1	1.23327e-19	1	Rps10
Zcchc24	1.19147e-23	0.140591	0.896	0.847	1.3684e-19	1	Zcchc24
S100a6	1.38436e-23	-0.406274	1	1	1.58994e-19	1	S100a6
Bambi	1.39188e-23	0.340033	0.32	0.229	1.59857e-19	1	Bambi
Il4ra	1.56913e-23	0.19429	0.597	0.497	1.80215e-19	1	Il4ra
Tmem87b	1.57045e-23	0.153674	0.567	0.471	1.80366e-19	1	Tmem87b
Rab32	1.75416e-23	-0.314015	0.183	0.429	2.01465e-19	1	Rab32
Smurf2	2.93336e-23	-0.363164	0.374	0.577	3.36897e-19	1	Smurf2
Egfr	2.96996e-23	0.159523	0.914	0.831	3.411e-19	1	Egfr
Jade1	3.0866e-23	0.216392	0.567	0.412	3.54496e-19	1	Jade1
Prrc2b	3.1497e-23	0.137262	0.787	0.708	3.61743e-19	1	Prrc2b
Rbbp6	3.38755e-23	0.167925	0.798	0.699	3.8906e-19	1	Rbbp6
Ston2	3.95835e-23	-0.344303	0.15	0.396	4.54616e-19	1	Ston2
Huwe1	4.05712e-23	0.140278	0.77	0.688	4.6596e-19	1	Huwe1
Scarb2	4.15708e-23	0.192207	0.663	0.581	4.77441e-19	1	Scarb2
Dnttip2	4.20379e-23	0.15988	0.534	0.44	4.82805e-19	1	Dnttip2
Hnrnph2	4.52813e-23	0.148837	0.648	0.542	5.20055e-19	1	Hnrnph2
Gem	4.73217e-23	0.375866	0.82	0.68	5.4349e-19	1	Gem
Naf1	4.87815e-23	0.179516	0.409	0.286	5.60256e-19	1	Naf1
Arl4d	5.41182e-23	-0.414119	0.208	0.45	6.21548e-19	1	Arl4d
Peg3	6.46198e-23	0.534287	0.573	0.348	7.42158e-19	1	Peg3
Pdgfrb	6.86378e-23	0.173726	0.823	0.698	7.88305e-19	1	Pdgfrb
Med25	7.26928e-23	0.183656	0.516	0.399	8.34877e-19	1	Med25
Rbms3	7.9816e-23	0.148723	0.881	0.836	9.16687e-19	1	Rbms3
Lmo4	8.93645e-23	0.192088	0.705	0.58	1.02635e-18	1	Lmo4
Rpl21	9.82453e-23	-0.255594	1	1	1.12835e-18	1	Rpl21
Socs1	1.03476e-22	0.452401	0.517	0.291	1.18842e-18	1	Socs1
Rere	1.1929e-22	0.149283	0.728	0.62	1.37005e-18	1	Rere
Cd63	2.01778e-22	0.108983	1	1	2.31742e-18	1	Cd63
Ryk	2.06722e-22	0.129221	0.809	0.758	2.37421e-18	1	Ryk
Aff4	2.07136e-22	0.137228	0.834	0.756	2.37896e-18	1	Aff4
Nrp1	2.52819e-22	0.247004	0.748	0.601	2.90362e-18	1	Nrp1
Prelp	2.55086e-22	0.200459	0.854	0.76	2.92967e-18	1	Prelp
Flnb	2.71649e-22	-0.309334	0.327	0.524	3.11988e-18	1	Flnb
Dnm1	2.85224e-22	-0.330324	0.442	0.641	3.2758e-18	1	Dnm1
Nr4a1	2.94194e-22	0.516056	0.682	0.463	3.37882e-18	1	Nr4a1
AC160336.1	3.07969e-22	0.278966	0.591	0.468	3.53703e-18	1	AC160336.1
Cyp2d22	3.10337e-22	0.169251	0.701	0.565	3.56422e-18	1	Cyp2d22
Zeb2	3.43483e-22	0.13603	0.978	0.954	3.9449e-18	1	Zeb2
Selenok	4.63796e-22	0.0723604	0.98	0.97	5.3267e-18	1	Selenok
Cdr2l	9.25273e-22	0.186864	0.366	0.291	1.06268e-17	1	Cdr2l
Ar	9.5261e-22	0.119883	0.967	0.938	1.09407e-17	1	Ar
Thy1	9.74308e-22	-0.368797	0.294	0.498	1.11899e-17	1	Thy1
Gnl3	1.00927e-21	0.171829	0.584	0.492	1.15915e-17	1	Gnl3
Arhgef12	1.07732e-21	0.122241	0.898	0.871	1.2373e-17	1	Arhgef12
Srrm2	1.34939e-21	0.0821994	0.989	0.975	1.54977e-17	1	Srrm2
Slc1a5	1.49653e-21	0.144381	0.849	0.798	1.71876e-17	1	Slc1a5
Pik3r1	1.50412e-21	0.196636	0.789	0.642	1.72748e-17	1	Pik3r1
Clic1	1.71622e-21	-0.353037	0.806	0.899	1.97108e-17	1	Clic1
Slc6a6	1.81576e-21	-0.341067	0.227	0.452	2.0854e-17	1	Slc6a6
Epdr1	2.27741e-21	-0.294732	0.235	0.466	2.61561e-17	1	Epdr1
Mndal	2.64739e-21	0.239961	0.644	0.559	3.04052e-17	1	Mndal
Smarca5	2.85445e-21	0.149013	0.755	0.681	3.27834e-17	1	Smarca5
Smc1a	2.94815e-21	0.164765	0.71	0.641	3.38595e-17	1	Smc1a
Entpd2	3.02052e-21	0.137099	0.985	0.899	3.46907e-17	1	Entpd2
Fmo1	3.07738e-21	0.195098	0.602	0.473	3.53438e-17	1	Fmo1
Rock1	3.16644e-21	0.12279	0.842	0.761	3.63665e-17	1	Rock1
Sh3bgrl	3.20259e-21	0.120028	0.863	0.793	3.67817e-17	1	Sh3bgrl
Stk40	3.98403e-21	0.163523	0.464	0.333	4.57566e-17	1	Stk40
Ptpn2	4.09188e-21	0.185227	0.385	0.249	4.69952e-17	1	Ptpn2
Rnd1	5.31248e-21	0.63567	0.273	0.104	6.10138e-17	1	Rnd1
Cped1	5.50961e-21	0.133842	0.887	0.811	6.32778e-17	1	Cped1
Nr1h3	5.58495e-21	0.180972	0.565	0.38	6.41431e-17	1	Nr1h3
Raf1	6.96306e-21	0.16225	0.576	0.484	7.99707e-17	1	Raf1
Myl6	9.84478e-21	-0.338787	0.989	0.992	1.13067e-16	1	Myl6
Rplp0	1.04798e-20	-0.256584	1	1	1.20361e-16	1	Rplp0
Fbln1	1.05563e-20	0.335132	0.98	0.777	1.21239e-16	1	Fbln1
Nup98	1.05916e-20	0.148581	0.652	0.556	1.21644e-16	1	Nup98
Ccnd2	1.09909e-20	0.232346	0.635	0.521	1.26231e-16	1	Ccnd2
Plin2	1.11695e-20	0.283082	0.834	0.718	1.28282e-16	1	Plin2
Sf3b1	1.16854e-20	0.117214	0.93	0.892	1.34207e-16	1	Sf3b1
Azin1	1.19512e-20	0.222993	0.708	0.532	1.3726e-16	1	Azin1
Sfxn1	1.3169e-20	0.153111	0.831	0.741	1.51246e-16	1	Sfxn1
Htra3	1.69962e-20	0.125311	0.997	0.992	1.95201e-16	1	Htra3
Atp2a2	1.8434e-20	0.124458	0.804	0.733	2.11714e-16	1	Atp2a2
Ppp3ca	1.84776e-20	0.140147	0.801	0.724	2.12216e-16	1	Ppp3ca
Ranbp2	1.92982e-20	0.146319	0.647	0.557	2.2164e-16	1	Ranbp2
Klf4	2.19316e-20	0.192603	0.997	0.991	2.51884e-16	1	Klf4
Csde1	2.26521e-20	0.0823543	0.953	0.922	2.60159e-16	1	Csde1
Usp25	2.8775e-20	0.148574	0.659	0.565	3.30481e-16	1	Usp25
Hspa9	2.93521e-20	0.12483	0.672	0.596	3.37109e-16	1	Hspa9
Ndrg1	3.78115e-20	-0.365224	0.243	0.47	4.34265e-16	1	Ndrg1
Aif1l	3.89123e-20	-0.408595	0.044	0.304	4.46908e-16	1	Aif1l
Sbds	4.68329e-20	0.145583	0.751	0.703	5.37876e-16	1	Sbds
Bclaf1	4.89664e-20	0.146846	0.92	0.877	5.6238e-16	1	Bclaf1
Hnrnpa3	6.38447e-20	0.101744	0.922	0.877	7.33257e-16	1	Hnrnpa3
Ppp2r1a	7.14074e-20	0.120379	0.648	0.556	8.20114e-16	1	Ppp2r1a
Gabarapl1	7.29701e-20	0.135382	0.875	0.793	8.38061e-16	1	Gabarapl1
Pim3	7.51135e-20	0.195917	0.512	0.391	8.62679e-16	1	Pim3
Oat	7.55337e-20	0.0981984	0.906	0.88	8.67504e-16	1	Oat
Wwtr1	7.57773e-20	0.134321	0.737	0.639	8.70303e-16	1	Wwtr1
Cdkn1c	1.10532e-19	-0.409476	0.698	0.78	1.26946e-15	1	Cdkn1c
Mafg	1.14929e-19	0.145241	0.706	0.608	1.31995e-15	1	Mafg
Grina	1.37596e-19	0.112821	0.898	0.85	1.58029e-15	1	Grina
Ctsl	1.4468e-19	0.0192313	1	1	1.66164e-15	1	Ctsl
Dmkn	1.48969e-19	-0.778494	0.006	0.189	1.71091e-15	1	Dmkn
Cxcl12	1.6177e-19	0.298836	0.968	0.781	1.85792e-15	1	Cxcl12
Ces2g	1.97208e-19	0.154664	0.676	0.581	2.26493e-15	1	Ces2g
Ttc19	2.24594e-19	0.153806	0.483	0.415	2.57947e-15	1	Ttc19
Adam12	2.45773e-19	0.187371	0.391	0.224	2.8227e-15	1	Adam12
Susd6	2.57723e-19	0.134737	0.598	0.505	2.95995e-15	1	Susd6
Smad1	2.7087e-19	0.135185	0.593	0.516	3.11094e-15	1	Smad1
Cdc42	2.72472e-19	0.0583407	0.981	0.981	3.12935e-15	1	Cdc42
Pcbp2	2.9957e-19	0.0504783	0.986	0.97	3.44056e-15	1	Pcbp2
Csnk1d	3.41498e-19	0.130463	0.615	0.539	3.9221e-15	1	Csnk1d
Ptma	3.43187e-19	0.0424113	0.999	1	3.94151e-15	1	Ptma
Pten	3.59173e-19	0.160955	0.849	0.751	4.1251e-15	1	Pten
Slc41a1	4.45543e-19	0.19096	0.367	0.237	5.11706e-15	1	Slc41a1
Dazap2	4.46786e-19	0.114076	0.776	0.721	5.13133e-15	1	Dazap2
4930402H24Rik	5.99493e-19	0.138455	0.527	0.424	6.88518e-15	1	4930402H24Rik
Ppp1r10	6.1425e-19	0.179495	0.529	0.429	7.05466e-15	1	Ppp1r10
Gstm1	6.274e-19	0.063574	1	0.998	7.20569e-15	1	Gstm1
Dusp18	6.41914e-19	0.264833	0.329	0.144	7.37239e-15	1	Dusp18
2020-09-04	7.71247e-19	0.20605	0.386	0.193	8.85778e-15	1	2020-09-04
Atp6v0a1	9.4431e-19	0.145145	0.396	0.286	1.08454e-14	1	Atp6v0a1
Nras	1.02606e-18	0.120823	0.634	0.571	1.17843e-14	1	Nras
Birc2	1.37172e-18	0.152666	0.496	0.415	1.57542e-14	1	Birc2
Srsf7	1.49784e-18	0.145249	0.568	0.49	1.72027e-14	1	Srsf7
Rasa3	1.52851e-18	0.175481	0.386	0.23	1.7555e-14	1	Rasa3
Ptgis	1.55956e-18	-0.340782	0.639	0.779	1.79115e-14	1	Ptgis
Gadd45a	1.64733e-18	0.294928	0.377	0.258	1.89195e-14	1	Gadd45a
S100a11	1.74056e-18	-0.365562	0.999	0.999	1.99904e-14	1	S100a11
Rassf2	1.87689e-18	0.15037	0.606	0.475	2.15561e-14	1	Rassf2
Mat2a	1.89481e-18	0.190015	0.874	0.815	2.17618e-14	1	Mat2a
Has2	2.10843e-18	-0.572546	0.126	0.318	2.42153e-14	1	Has2
Usp9x	2.11514e-18	0.123294	0.743	0.695	2.42924e-14	1	Usp9x
Gdf10	2.11574e-18	0.369351	0.537	0.352	2.42992e-14	1	Gdf10
Vim	2.26822e-18	0.0399469	1	1	2.60505e-14	1	Vim
Pla1a	2.35695e-18	-0.43255	0.841	0.883	2.70695e-14	1	Pla1a
Abca5	2.37714e-18	-0.283747	0.285	0.483	2.73014e-14	1	Abca5
Mmp19	2.74941e-18	0.167348	0.497	0.405	3.1577e-14	1	Mmp19
Txn1	2.94661e-18	0.0810491	0.995	0.986	3.38418e-14	1	Txn1
Serpine1	2.96302e-18	0.720306	0.557	0.319	3.40302e-14	1	Serpine1
Il13ra1	3.16633e-18	-0.296951	0.178	0.383	3.63652e-14	1	Il13ra1
Zfp36l2	3.43069e-18	0.195963	0.922	0.918	3.94015e-14	1	Zfp36l2
Ppp1r18	3.48647e-18	0.135213	0.471	0.387	4.00421e-14	1	Ppp1r18
Arpc2	4.10209e-18	-0.32032	0.896	0.933	4.71125e-14	1	Arpc2
Jak1	4.11205e-18	0.0669889	0.977	0.968	4.72269e-14	1	Jak1
Eif3a	4.32902e-18	0.0876549	0.907	0.878	4.97188e-14	1	Eif3a
Tmem106a	4.69147e-18	0.140384	0.527	0.429	5.38816e-14	1	Tmem106a
Ctnnb1	4.70693e-18	0.0961605	0.867	0.825	5.40591e-14	1	Ctnnb1
Sar1a	5.21815e-18	0.0921187	0.865	0.804	5.99304e-14	1	Sar1a
Cflar	6.30394e-18	0.135197	0.595	0.521	7.24007e-14	1	Cflar
Rnf144a	6.60652e-18	0.147723	0.438	0.332	7.58759e-14	1	Rnf144a
Atxn1	7.40963e-18	0.167437	0.381	0.25	8.50996e-14	1	Atxn1
Zfp281	7.59711e-18	0.152672	0.379	0.261	8.72528e-14	1	Zfp281
Tcf4	7.8808e-18	0.106184	0.978	0.945	9.0511e-14	1	Tcf4
Rpl11	8.47629e-18	-0.239646	1	1	9.73502e-14	1	Rpl11
Sos2	9.47727e-18	0.131189	0.461	0.345	1.08846e-13	1	Sos2
Dcbld2	9.89392e-18	-0.320631	0.417	0.589	1.13632e-13	1	Dcbld2
Ptbp1	1.00348e-17	0.124846	0.586	0.507	1.1525e-13	1	Ptbp1
Hmgb2	1.36835e-17	0.166074	0.562	0.464	1.57155e-13	1	Hmgb2
Tubb2b	1.42102e-17	-0.361872	0.046	0.315	1.63204e-13	1	Tubb2b
Eif4g2	1.42918e-17	0.0499437	0.98	0.977	1.64142e-13	1	Eif4g2
Rap1b	1.51503e-17	0.0710133	0.961	0.917	1.74001e-13	1	Rap1b
Serpina3n	1.54024e-17	0.241291	0.388	0.256	1.76896e-13	1	Serpina3n
Jpt1	1.70438e-17	-0.358055	0.756	0.855	1.95749e-13	1	Jpt1
Ppp2ca	1.75236e-17	0.0940032	0.812	0.778	2.01259e-13	1	Ppp2ca
Procr	1.85946e-17	-0.468195	0.518	0.604	2.13559e-13	1	Procr
Col4a2	1.87313e-17	0.278752	0.949	0.763	2.15129e-13	1	Col4a2
Lrrc58	2.17318e-17	0.111457	0.813	0.748	2.4959e-13	1	Lrrc58
Glud1	2.3244e-17	-0.322664	0.76	0.853	2.66957e-13	1	Glud1
Cotl1	2.37945e-17	-0.300127	0.508	0.684	2.7328e-13	1	Cotl1
Appbp2	2.49673e-17	0.128974	0.532	0.443	2.8675e-13	1	Appbp2
Aebp1	2.50538e-17	-0.419484	0.928	0.969	2.87743e-13	1	Aebp1
Herc1	2.53688e-17	0.132983	0.654	0.559	2.91361e-13	1	Herc1
Sema5a	2.74035e-17	0.197272	0.565	0.364	3.14729e-13	1	Sema5a
Amotl2	2.79681e-17	0.200822	0.761	0.698	3.21214e-13	1	Amotl2
Bmper	2.83801e-17	0.203244	0.497	0.346	3.25945e-13	1	Bmper
Npm1	3.06946e-17	-0.308576	0.957	0.972	3.52528e-13	1	Npm1
Tifa	3.35412e-17	0.317369	0.28	0.113	3.85221e-13	1	Tifa
Ppib	3.38583e-17	-0.302069	0.978	0.997	3.88862e-13	1	Ppib
Pear1	3.42037e-17	0.158985	0.393	0.232	3.92829e-13	1	Pear1
Prrc2c	3.49582e-17	0.0800825	0.947	0.92	4.01495e-13	1	Prrc2c
Nrip1	3.6673e-17	0.1569	0.734	0.664	4.21189e-13	1	Nrip1
Ppp2r3a	3.70729e-17	0.138642	0.548	0.447	4.25782e-13	1	Ppp2r3a
Apbb1ip	4.42677e-17	0.171533	0.807	0.686	5.08414e-13	1	Apbb1ip
Eif4ebp2	4.68255e-17	0.124293	0.667	0.567	5.37791e-13	1	Eif4ebp2
Map3k20	4.69538e-17	0.130169	0.449	0.343	5.39264e-13	1	Map3k20
Fkbp2	4.83371e-17	-0.262574	0.353	0.548	5.55152e-13	1	Fkbp2
Rbp1	5.01711e-17	0.138084	0.95	0.806	5.76215e-13	1	Rbp1
Fads1	5.22292e-17	0.119535	0.52	0.407	5.99852e-13	1	Fads1
Ptprd	5.61546e-17	0.171089	0.483	0.315	6.44936e-13	1	Ptprd
Lgi2	5.7771e-17	-0.320276	0.356	0.544	6.635e-13	1	Lgi2
Itm2b	5.95717e-17	0.0344658	1	1	6.84181e-13	1	Itm2b
Wnt10b	5.96189e-17	-0.402819	0.017	0.282	6.84724e-13	1	Wnt10b
Yap1	6.70065e-17	0.124165	0.421	0.332	7.6957e-13	1	Yap1
Sdc2	6.71986e-17	0.105387	0.943	0.915	7.71776e-13	1	Sdc2
H2-Q4	7.39997e-17	0.235355	0.717	0.612	8.49886e-13	1	H2-Q4
Rbpj	7.53087e-17	-0.332976	0.756	0.861	8.6492e-13	1	Rbpj
Ptges3	7.89865e-17	0.091432	0.842	0.785	9.0716e-13	1	Ptges3
Gm42418	8.01328e-17	0.0816351	1	1	9.20325e-13	1	Gm42418
Gsta3	9.23707e-17	0.311032	0.516	0.298	1.06088e-12	1	Gsta3
Becn1	9.34262e-17	0.114169	0.473	0.4	1.073e-12	1	Becn1
Hnrnpab	9.50431e-17	0.105254	0.751	0.696	1.09157e-12	1	Hnrnpab
AW112010	9.72289e-17	0.223382	0.845	0.721	1.11667e-12	1	AW112010
Ksr1	1.02754e-16	0.141491	0.394	0.267	1.18013e-12	1	Ksr1
Cltb	1.04183e-16	0.0994939	0.759	0.702	1.19654e-12	1	Cltb
Hipk1	1.06177e-16	0.124775	0.544	0.463	1.21944e-12	1	Hipk1
Sp100	1.06265e-16	0.129421	0.686	0.636	1.22045e-12	1	Sp100
Pde1a	1.14121e-16	0.139926	0.412	0.304	1.31068e-12	1	Pde1a
Tpcn1	1.16289e-16	0.123573	0.479	0.374	1.33558e-12	1	Tpcn1
Col1a1	1.25457e-16	-0.435772	0.986	0.996	1.44087e-12	1	Col1a1
Ubn2	1.34014e-16	0.144695	0.61	0.561	1.53915e-12	1	Ubn2
Taf7	1.39832e-16	0.132373	0.412	0.327	1.60597e-12	1	Taf7
Blvrb	1.40745e-16	-0.288499	0.667	0.795	1.61646e-12	1	Blvrb
Ntn4	1.48406e-16	-0.293454	0.353	0.547	1.70444e-12	1	Ntn4
Ckb	1.53511e-16	-0.318962	0.413	0.59	1.76307e-12	1	Ckb
Map4k5	1.58184e-16	0.124181	0.54	0.447	1.81674e-12	1	Map4k5
Kat2b	1.58228e-16	0.118686	0.643	0.559	1.81725e-12	1	Kat2b
Pde8a	1.59815e-16	-0.296724	0.461	0.614	1.83548e-12	1	Pde8a
Sec24d	1.68988e-16	0.114451	0.61	0.526	1.94082e-12	1	Sec24d
Gls	1.71689e-16	0.125848	0.773	0.733	1.97185e-12	1	Gls
Srsf6	1.8156e-16	0.110752	0.691	0.659	2.08521e-12	1	Srsf6
Timp3	1.92266e-16	-0.498678	0.705	0.857	2.20818e-12	1	Timp3
Bgn	1.99456e-16	0.276749	0.947	0.765	2.29075e-12	1	Bgn
Parp14	2.10185e-16	0.165085	0.471	0.392	2.41397e-12	1	Parp14
Tob2	2.10758e-16	0.138453	0.577	0.494	2.42055e-12	1	Tob2
Ehd1	2.24151e-16	-0.302967	0.47	0.65	2.57437e-12	1	Ehd1
Pxk	2.25584e-16	0.120401	0.471	0.41	2.59083e-12	1	Pxk
Ccnl2	2.26642e-16	0.120356	0.757	0.68	2.60299e-12	1	Ccnl2
Dctn2	2.27721e-16	-0.277856	0.609	0.787	2.61537e-12	1	Dctn2
Vgll3	2.28772e-16	-0.367113	0.564	0.707	2.62744e-12	1	Vgll3
Tfe3	2.32217e-16	0.140617	0.485	0.408	2.66702e-12	1	Tfe3
mt-Co2	2.51964e-16	-0.00817549	1	1	2.89381e-12	1	mt-Co2
Sdcbp	2.59172e-16	0.0670642	0.966	0.945	2.97659e-12	1	Sdcbp
Arhgap24	2.61395e-16	0.144415	0.52	0.396	3.00212e-12	1	Arhgap24
Arid1a	2.61816e-16	0.113601	0.675	0.582	3.00696e-12	1	Arid1a
Pla2r1	3.43028e-16	0.153045	0.693	0.576	3.93967e-12	1	Pla2r1
Glce	3.46946e-16	-0.306533	0.146	0.341	3.98468e-12	1	Glce
Arhgap32	3.67715e-16	0.121883	0.435	0.344	4.22321e-12	1	Arhgap32
Cited2	3.72344e-16	-0.44539	0.319	0.533	4.27638e-12	1	Cited2
Pde3a	3.77815e-16	0.124666	0.734	0.7	4.33921e-12	1	Pde3a
B2m	4.2764e-16	0.0483301	0.999	1	4.91145e-12	1	B2m
Cmklr1	4.42891e-16	0.147823	0.409	0.274	5.0866e-12	1	Cmklr1
Mgst1	4.74632e-16	0.0883626	1	0.993	5.45115e-12	1	Mgst1
Lbp	4.89704e-16	-0.396012	0.686	0.779	5.62425e-12	1	Lbp
Rap1a	5.27338e-16	-0.294209	0.792	0.881	6.05648e-12	1	Rap1a
Bag1	5.55746e-16	-0.300973	0.612	0.74	6.38274e-12	1	Bag1
Shc1	5.67879e-16	0.10851	0.654	0.55	6.52209e-12	1	Shc1
Galnt15	5.83459e-16	0.197467	0.919	0.816	6.70102e-12	1	Galnt15
Il33	7.09976e-16	-0.487371	0.051	0.24	8.15407e-12	1	Il33
Fscn1	7.26078e-16	0.141258	0.419	0.336	8.33901e-12	1	Fscn1
Cltc	7.51822e-16	0.0914525	0.836	0.795	8.63468e-12	1	Cltc
Timp2	7.54928e-16	-0.322425	1	1	8.67035e-12	1	Timp2
Xdh	8.44259e-16	0.082643	0.907	0.877	9.69632e-12	1	Xdh
Malsu1	9.38809e-16	0.106927	0.557	0.484	1.07822e-11	1	Malsu1
Prrc2a	9.69706e-16	0.095873	0.745	0.666	1.11371e-11	1	Prrc2a
Cebpg	9.94146e-16	0.123972	0.596	0.51	1.14178e-11	1	Cebpg
Palld	1.1496e-15	0.170648	0.447	0.329	1.32032e-11	1	Palld
Tspan5	1.16117e-15	-0.25118	0.313	0.512	1.3336e-11	1	Tspan5
Stag2	1.23331e-15	0.105442	0.668	0.618	1.41645e-11	1	Stag2
Omd	1.27478e-15	-0.287295	0.192	0.377	1.46408e-11	1	Omd
Ogfrl1	1.27705e-15	0.173599	0.348	0.226	1.46669e-11	1	Ogfrl1
Igfbp7	1.27991e-15	0.280639	0.997	0.88	1.46997e-11	1	Igfbp7
Sumo1	1.50738e-15	0.0752995	0.795	0.785	1.73123e-11	1	Sumo1
mt-Nd3	1.55223e-15	0.0463794	0.99	0.98	1.78274e-11	1	mt-Nd3
Il1r1	1.71122e-15	0.144811	0.704	0.606	1.96533e-11	1	Il1r1
Mycbp2	1.79393e-15	0.108496	0.821	0.761	2.06033e-11	1	Mycbp2
Rpl19	1.97475e-15	-0.217878	1	1	2.268e-11	1	Rpl19
Atf6	2.15188e-15	0.115005	0.445	0.341	2.47143e-11	1	Atf6
Srsf3	2.20669e-15	0.082737	0.898	0.85	2.53438e-11	1	Srsf3
Usp37	2.21986e-15	0.159792	0.352	0.219	2.54951e-11	1	Usp37
Rps16	2.67793e-15	-0.0920482	1	1	3.0756e-11	1	Rps16
Ppp1cb	2.93891e-15	0.0889301	0.787	0.729	3.37533e-11	1	Ppp1cb
Hectd1	3.00107e-15	0.0815737	0.825	0.792	3.44673e-11	1	Hectd1
2020-09-11	3.02296e-15	0.108991	0.832	0.781	3.47187e-11	1	2020-09-11
Ifi27l2a	3.17316e-15	-0.462001	0.832	0.893	3.64437e-11	1	Ifi27l2a
Hnrnpk	3.47022e-15	0.0315535	0.976	0.967	3.98554e-11	1	Hnrnpk
Elf1	3.75169e-15	0.105891	0.762	0.705	4.30882e-11	1	Elf1
Ces1d	3.91553e-15	0.193916	0.548	0.462	4.49699e-11	1	Ces1d
Zcchc6	3.92235e-15	0.116994	0.709	0.646	4.50481e-11	1	Zcchc6
Rpl35	4.09572e-15	-0.248222	1	1	4.70393e-11	1	Rpl35
Rpl10	4.12754e-15	-0.241804	1	1	4.74048e-11	1	Rpl10
Flrt2	4.16373e-15	-0.337203	0.565	0.719	4.78204e-11	1	Flrt2
Cfl1	4.44365e-15	0.0548892	0.949	0.938	5.10353e-11	1	Cfl1
Enpep	4.51327e-15	0.12562	0.628	0.531	5.18349e-11	1	Enpep
Ctdsp2	5.03545e-15	0.0575626	0.944	0.938	5.78322e-11	1	Ctdsp2
Nipbl	5.47366e-15	0.0887886	0.803	0.765	6.2865e-11	1	Nipbl
Rgl1	5.8538e-15	0.094095	0.715	0.651	6.72309e-11	1	Rgl1
Igf2r	5.85415e-15	0.111077	0.746	0.691	6.7235e-11	1	Igf2r
Anxa5	6.79043e-15	0.0702793	0.991	0.979	7.79881e-11	1	Anxa5
Csrp2	7.07982e-15	-0.326607	0.699	0.755	8.13117e-11	1	Csrp2
Naca	7.16121e-15	-0.259043	0.996	0.999	8.22465e-11	1	Naca
Tril	9.01336e-15	0.173207	0.644	0.492	1.03518e-10	1	Tril
Morf4l2	9.01744e-15	0.0805406	0.812	0.776	1.03565e-10	1	Morf4l2
Ifnar2	9.4636e-15	0.088164	0.723	0.687	1.08689e-10	1	Ifnar2
Thbs3	9.79562e-15	-0.271148	0.463	0.653	1.12503e-10	1	Thbs3
Heph	1.03604e-14	0.142477	0.388	0.267	1.18989e-10	1	Heph
Cfh	1.05675e-14	0.144567	0.921	0.845	1.21367e-10	1	Cfh
Rcan1	1.08456e-14	0.268816	0.393	0.382	1.24562e-10	1	Rcan1
Aldoa	1.10017e-14	0.0572232	0.949	0.935	1.26355e-10	1	Aldoa
Cd9	1.17923e-14	-0.411996	0.69	0.77	1.35434e-10	1	Cd9
Qk	1.25944e-14	0.0864287	0.865	0.836	1.44647e-10	1	Qk
Lrrc8a	1.31903e-14	0.112354	0.527	0.49	1.5149e-10	1	Lrrc8a
Ppp1r12a	1.41748e-14	0.0958334	0.706	0.658	1.62797e-10	1	Ppp1r12a
Postn	1.42625e-14	-0.515585	0.684	0.784	1.63805e-10	1	Postn
Fnip1	1.44607e-14	0.107244	0.642	0.562	1.66081e-10	1	Fnip1
Apaf1	1.57021e-14	0.146397	0.335	0.238	1.80339e-10	1	Apaf1
Prss23	1.93567e-14	-0.410528	0.891	0.956	2.22311e-10	1	Prss23
Cnbp	1.93832e-14	0.0475885	0.935	0.935	2.22616e-10	1	Cnbp
Man2a2	2.21352e-14	0.122805	0.565	0.464	2.54223e-10	1	Man2a2
Mllt6	2.25939e-14	0.111223	0.427	0.341	2.59491e-10	1	Mllt6
Emp1	2.29555e-14	0.200798	0.798	0.788	2.63644e-10	1	Emp1
Aplp2	2.40364e-14	0.0663478	0.919	0.917	2.76058e-10	1	Aplp2
Gpc3	2.44352e-14	-0.372546	0.832	0.892	2.80639e-10	1	Gpc3
Gli3	2.62647e-14	0.111615	0.502	0.415	3.0165e-10	1	Gli3
Hdac7	2.7415e-14	-0.314723	0.651	0.771	3.14861e-10	1	Hdac7
mt-Nd1	2.83883e-14	-0.00680663	1	1	3.26039e-10	1	mt-Nd1
Eif5	2.95073e-14	0.0683174	0.886	0.857	3.38892e-10	1	Eif5
Baz1b	3.04325e-14	0.112002	0.61	0.525	3.49517e-10	1	Baz1b
Csgalnact1	3.1637e-14	0.148379	0.341	0.225	3.63351e-10	1	Csgalnact1
Meg3	3.31591e-14	-0.492935	0.856	0.879	3.80832e-10	1	Meg3
Mga	3.57678e-14	0.114165	0.665	0.599	4.10793e-10	1	Mga
Notch2	3.61269e-14	-0.288846	0.529	0.675	4.14918e-10	1	Notch2
Srpr	3.76891e-14	0.0920554	0.68	0.637	4.3286e-10	1	Srpr
Bzw1	3.79274e-14	0.0794693	0.816	0.765	4.35596e-10	1	Bzw1
Rtn4	4.14879e-14	0.0346172	0.975	0.982	4.76489e-10	1	Rtn4
mt-Nd2	4.15406e-14	-0.000770474	1	1	4.77094e-10	1	mt-Nd2
Ubxn4	4.19496e-14	0.0857168	0.755	0.722	4.81791e-10	1	Ubxn4
Ntrk2	4.68276e-14	0.13245	0.83	0.726	5.37815e-10	1	Ntrk2
Tdp2	4.7491e-14	0.127158	0.376	0.272	5.45434e-10	1	Tdp2
Cyr61	4.76567e-14	-0.735372	0.365	0.509	5.47337e-10	1	Cyr61
Ptger4	4.91846e-14	0.311739	0.274	0.093	5.64885e-10	1	Ptger4
Ubn1	5.08656e-14	0.0996925	0.626	0.58	5.84191e-10	1	Ubn1
Mdm2	5.25332e-14	0.120582	0.433	0.368	6.03344e-10	1	Mdm2
Stx11	5.25335e-14	0.177302	0.339	0.19	6.03348e-10	1	Stx11
Mapre2	5.3473e-14	0.0962592	0.64	0.574	6.14137e-10	1	Mapre2
Glg1	5.5566e-14	0.0818846	0.799	0.743	6.38175e-10	1	Glg1
Ank2	5.9847e-14	0.13349	0.573	0.462	6.87343e-10	1	Ank2
Jup	6.03204e-14	0.122555	0.365	0.278	6.9278e-10	1	Jup
BC005561	6.06842e-14	0.130319	0.442	0.369	6.96958e-10	1	BC005561
Insr	6.12169e-14	0.112231	0.454	0.369	7.03076e-10	1	Insr
Eif4g1	6.1278e-14	0.0887807	0.726	0.689	7.03778e-10	1	Eif4g1
Mif	6.64364e-14	0.155442	0.794	0.626	7.63022e-10	1	Mif
Tmem248	7.29683e-14	0.102553	0.433	0.358	8.38041e-10	1	Tmem248
Heg1	7.4309e-14	-0.337326	0.802	0.851	8.53439e-10	1	Heg1
Krtdap	7.46407e-14	-0.674359	0.001	0.17	8.57248e-10	1	Krtdap
Rps3	7.56536e-14	-0.233464	1	1	8.68882e-10	1	Rps3
Ints6	8.57779e-14	0.122728	0.534	0.441	9.85159e-10	1	Ints6
Idh1	8.97853e-14	0.105088	0.732	0.667	1.03118e-09	1	Idh1
Luc7l2	9.04784e-14	0.0594966	0.966	0.954	1.03914e-09	1	Luc7l2
Slc25a4	9.62283e-14	-0.278351	0.936	0.971	1.10518e-09	1	Slc25a4
Pttg1	9.90627e-14	0.0904799	0.587	0.551	1.13773e-09	1	Pttg1
Adcyap1r1	1.00481e-13	0.175667	0.357	0.188	1.15403e-09	1	Adcyap1r1
Rbm39	1.06532e-13	0.0352147	0.986	0.99	1.22351e-09	1	Rbm39
Snx9	1.06936e-13	0.0844636	0.765	0.716	1.22815e-09	1	Snx9
Klf6	1.07156e-13	0.18993	0.961	0.949	1.23069e-09	1	Klf6
Rbm18	1.1261e-13	0.113215	0.396	0.336	1.29332e-09	1	Rbm18
Hnrnpc	1.2846e-13	0.0858492	0.712	0.677	1.47537e-09	1	Hnrnpc
Prdx1	1.43991e-13	0.017947	0.981	0.984	1.65373e-09	1	Prdx1
Lama4	1.60258e-13	-0.331038	0.743	0.852	1.84057e-09	1	Lama4
Il18	1.74075e-13	-0.273759	0.149	0.344	1.99926e-09	1	Il18
Gnaq	1.77931e-13	0.0912204	0.653	0.621	2.04354e-09	1	Gnaq
Spaca6	1.89189e-13	0.160213	0.299	0.212	2.17284e-09	1	Spaca6
Mosmo	2.10995e-13	0.100107	0.59	0.525	2.42328e-09	1	Mosmo
Spock2	2.20481e-13	0.121357	0.502	0.391	2.53222e-09	1	Spock2
Txnip	2.29432e-13	-0.533843	0.926	0.868	2.63502e-09	1	Txnip
Apobec3	2.38405e-13	0.147051	0.311	0.22	2.73808e-09	1	Apobec3
D17Wsu92e	2.39051e-13	0.0938517	0.482	0.418	2.74551e-09	1	D17Wsu92e
Ist1	2.39964e-13	0.0964633	0.479	0.403	2.75598e-09	1	Ist1
Tcf7l1	2.47928e-13	0.092673	0.633	0.576	2.84745e-09	1	Tcf7l1
Igsf3	2.50812e-13	0.115785	0.404	0.281	2.88058e-09	1	Igsf3
Man2a1	2.73497e-13	0.120443	0.844	0.821	3.14111e-09	1	Man2a1
Dennd5a	2.82608e-13	0.0803903	0.686	0.625	3.24575e-09	1	Dennd5a
Dtx4	2.84471e-13	0.11146	0.435	0.353	3.26715e-09	1	Dtx4
Cmah	2.87175e-13	-0.350312	0.05	0.271	3.2982e-09	1	Cmah
Pts	3.25404e-13	-0.238196	0.189	0.389	3.73726e-09	1	Pts
Dlc1	3.55063e-13	0.119607	0.832	0.772	4.0779e-09	1	Dlc1
Il11ra1	3.66112e-13	0.0932283	0.795	0.74	4.2048e-09	1	Il11ra1
Hspb1	3.90474e-13	-0.52691	0.346	0.442	4.48459e-09	1	Hspb1
Apod	4.03647e-13	0.358421	0.812	0.705	4.63588e-09	1	Apod
Hsd11b1	4.04812e-13	0.288724	0.821	0.609	4.64927e-09	1	Hsd11b1
Angptl4	4.13527e-13	-0.37633	0.593	0.759	4.74936e-09	1	Angptl4
Ddx6	4.15261e-13	0.0772813	0.848	0.816	4.76927e-09	1	Ddx6
Cyb5a	4.26088e-13	0.0293094	0.999	0.997	4.89362e-09	1	Cyb5a
Nmt2	4.50664e-13	-0.239228	0.288	0.488	5.17587e-09	1	Nmt2
Arhgap29	4.51938e-13	-0.28247	0.493	0.656	5.1905e-09	1	Arhgap29
Arhgap35	4.60198e-13	0.0972433	0.438	0.375	5.28537e-09	1	Arhgap35
Creb5	4.60217e-13	-0.401209	0.792	0.866	5.28559e-09	1	Creb5
Rab10	4.82805e-13	0.0802082	0.743	0.714	5.54501e-09	1	Rab10
Atxn2l	4.90465e-13	0.0949475	0.591	0.536	5.63299e-09	1	Atxn2l
Nagk	5.16424e-13	-0.224572	0.285	0.488	5.93113e-09	1	Nagk
Hnrnph3	5.24977e-13	0.0955304	0.506	0.45	6.02936e-09	1	Hnrnph3
Rnd3	5.28345e-13	0.162673	0.521	0.462	6.06804e-09	1	Rnd3
Ftl1	5.33062e-13	-0.0126115	1	1	6.12222e-09	1	Ftl1
Sned1	5.47039e-13	0.193198	0.601	0.509	6.28274e-09	1	Sned1
Clk1	5.66278e-13	0.0865122	0.921	0.894	6.5037e-09	1	Clk1
Ptx3	5.82895e-13	0.601173	0.634	0.405	6.69454e-09	1	Ptx3
Lars2	6.07817e-13	0.0599316	0.966	0.928	6.98078e-09	1	Lars2
Klf2	6.68625e-13	0.165597	0.992	0.98	7.67916e-09	1	Klf2
Cd200	7.99945e-13	-0.339976	0.042	0.28	9.18737e-09	1	Cd200
Thbs2	8.17227e-13	-0.363676	0.404	0.632	9.38586e-09	1	Thbs2
Sirpa	8.58604e-13	-0.2458	0.391	0.55	9.86107e-09	1	Sirpa
Nfe2l2	9.1838e-13	0.0650935	0.853	0.843	1.05476e-08	1	Nfe2l2
P4ha1	9.33264e-13	0.0979068	0.663	0.594	1.07185e-08	1	P4ha1
Plxnb2	9.62798e-13	0.0887148	0.582	0.52	1.10577e-08	1	Plxnb2
Iqsec1	9.73982e-13	-0.22565	0.299	0.471	1.11862e-08	1	Iqsec1
Sf3b3	1.01708e-12	0.0994678	0.534	0.452	1.16812e-08	1	Sf3b3
Il34	1.01934e-12	-0.348899	0.091	0.268	1.17071e-08	1	Il34
Lama2	1.02447e-12	0.0717168	0.962	0.946	1.17661e-08	1	Lama2
Ranbp9	1.04653e-12	0.0937345	0.548	0.443	1.20195e-08	1	Ranbp9
Scarf2	1.05501e-12	0.112556	0.529	0.423	1.21168e-08	1	Scarf2
Vgll4	1.0773e-12	0.101526	0.493	0.419	1.23728e-08	1	Vgll4
Rps9	1.09711e-12	-0.0785455	1	1	1.26003e-08	1	Rps9
mt-Co3	1.19638e-12	-0.0331971	1	1	1.37404e-08	1	mt-Co3
Mitf	1.21962e-12	0.11568	0.62	0.524	1.40073e-08	1	Mitf
Gm26518	1.26553e-12	0.114525	0.384	0.291	1.45347e-08	1	Gm26518
2020-09-08	1.38007e-12	0.0898681	0.759	0.725	1.58501e-08	1	2020-09-08
Ugp2	1.40919e-12	-0.287823	0.611	0.74	1.61846e-08	1	Ugp2
Nop53	1.41598e-12	0.044948	0.842	0.827	1.62625e-08	1	Nop53
N4bp2l2	1.46421e-12	0.0960364	0.593	0.56	1.68164e-08	1	N4bp2l2
Sav1	1.57186e-12	0.0933677	0.61	0.618	1.80529e-08	1	Sav1
Prkar1a	1.60509e-12	0.057585	0.828	0.78	1.84345e-08	1	Prkar1a
Med7	1.89519e-12	0.104301	0.375	0.299	2.17663e-08	1	Med7
Spon1	1.97261e-12	0.184003	0.414	0.274	2.26554e-08	1	Spon1
Pdpn	2.04608e-12	-0.340758	0.72	0.815	2.34992e-08	1	Pdpn
Plod1	2.20582e-12	0.120397	0.473	0.369	2.53338e-08	1	Plod1
Ttyh2	2.25692e-12	-0.310892	0.056	0.292	2.59207e-08	1	Ttyh2
Mrpl33	2.27119e-12	-0.264263	0.747	0.844	2.60846e-08	1	Mrpl33
Ctnnd1	2.37394e-12	0.0856916	0.554	0.488	2.72648e-08	1	Ctnnd1
Irak1	2.42241e-12	0.0784838	0.653	0.594	2.78214e-08	1	Irak1
Nampt	2.57987e-12	0.107339	0.55	0.52	2.96298e-08	1	Nampt
Fzd4	2.59679e-12	0.127201	0.573	0.48	2.98241e-08	1	Fzd4
Dnaja2	2.61492e-12	0.0716279	0.698	0.677	3.00324e-08	1	Dnaja2
Zmynd11	2.93683e-12	0.075202	0.765	0.714	3.37295e-08	1	Zmynd11
Zcchc14	3.22013e-12	0.0940941	0.524	0.461	3.69832e-08	1	Zcchc14
Fbln5	3.2267e-12	-0.317783	0.873	0.919	3.70587e-08	1	Fbln5
Aldh6a1	3.2624e-12	0.103872	0.381	0.295	3.74687e-08	1	Aldh6a1
Ntn1	3.33416e-12	-0.247252	0.301	0.448	3.82929e-08	1	Ntn1
Rala	3.44404e-12	-0.229498	0.4	0.566	3.95548e-08	1	Rala
Tnfsf9	3.69071e-12	0.298169	0.342	0.305	4.23878e-08	1	Tnfsf9
Gabpb1	3.75596e-12	0.185707	0.311	0.15	4.31372e-08	1	Gabpb1
Glyr1	3.79083e-12	0.0875808	0.535	0.464	4.35377e-08	1	Glyr1
Tpp2	3.81858e-12	0.0983783	0.489	0.451	4.38564e-08	1	Tpp2
Dcun1d3	3.82755e-12	0.10281	0.402	0.341	4.39594e-08	1	Dcun1d3
Chd4	3.97591e-12	0.0879963	0.828	0.789	4.56634e-08	1	Chd4
Irgm2	4.14925e-12	0.145704	0.33	0.217	4.76541e-08	1	Irgm2
Kank1	4.31961e-12	-0.248968	0.182	0.36	4.96107e-08	1	Kank1
Setbp1	4.3492e-12	0.11415	0.368	0.281	4.99505e-08	1	Setbp1
Irf2bpl	4.37937e-12	0.104808	0.644	0.607	5.02971e-08	1	Irf2bpl
Prpf38a	4.38016e-12	0.0948814	0.403	0.315	5.03061e-08	1	Prpf38a
Edn1	4.43534e-12	-0.51407	0.023	0.189	5.09398e-08	1	Edn1
Cyp27a1	4.56806e-12	0.10177	0.609	0.519	5.24642e-08	1	Cyp27a1
Sema3e	4.81603e-12	-0.355209	0.022	0.263	5.53121e-08	1	Sema3e
D630033O11Rik	5.28543e-12	-0.255638	0.215	0.389	6.07032e-08	1	D630033O11Rik
Stt3b	5.35912e-12	0.078421	0.709	0.669	6.15495e-08	1	Stt3b
Fabp4	5.51617e-12	0.487016	0.731	0.438	6.33532e-08	1	Fabp4
Ifngr1	6.22798e-12	0.0700566	0.917	0.877	7.15283e-08	1	Ifngr1
Rpl29	6.87332e-12	-0.242331	0.999	0.999	7.894e-08	1	Rpl29
Cyb5r3	6.99061e-12	-0.25403	0.427	0.577	8.02871e-08	1	Cyb5r3
Rin2	7.21077e-12	0.107446	0.708	0.584	8.28157e-08	1	Rin2
Srpx2	7.63203e-12	0.123472	0.582	0.499	8.76539e-08	1	Srpx2
Tm9sf2	8.18047e-12	0.0630747	0.76	0.716	9.39527e-08	1	Tm9sf2
Khdrbs1	8.70658e-12	0.0823245	0.637	0.589	9.9995e-08	1	Khdrbs1
Maml1	8.79452e-12	0.12063	0.335	0.229	1.01005e-07	1	Maml1
Ctbp2	8.92224e-12	0.101842	0.357	0.265	1.02472e-07	1	Ctbp2
Rpl6	9.51559e-12	-0.225702	1	1	1.09287e-07	1	Rpl6
Numbl	9.63588e-12	0.0854897	0.525	0.484	1.10668e-07	1	Numbl
Cdc42ep2	1.02422e-11	-0.23611	0.203	0.38	1.17631e-07	1	Cdc42ep2
Clec3b	1.02754e-11	-0.295841	1	1	1.18014e-07	1	Clec3b
Ptgs1	1.03385e-11	-0.350006	0.036	0.259	1.18737e-07	1	Ptgs1
Rpl27	1.09377e-11	-0.258104	0.99	0.988	1.2562e-07	1	Rpl27
App	1.1043e-11	0.0143885	0.987	0.987	1.26829e-07	1	App
Auts2	1.10573e-11	0.138162	0.715	0.58	1.26993e-07	1	Auts2
Tle1	1.13176e-11	0.10715	0.468	0.365	1.29982e-07	1	Tle1
2610507B11Rik	1.16137e-11	0.0768743	0.592	0.553	1.33383e-07	1	2610507B11Rik
Antxr1	1.19692e-11	-0.305498	0.837	0.886	1.37467e-07	1	Antxr1
Eln	1.23011e-11	-0.370323	0.661	0.775	1.41279e-07	1	Eln
Cnih1	1.23731e-11	-0.222675	0.374	0.572	1.42105e-07	1	Cnih1
Enpp2	1.24882e-11	0.163288	0.795	0.658	1.43427e-07	1	Enpp2
Slc39a1	1.35016e-11	0.0659132	0.807	0.767	1.55066e-07	1	Slc39a1
Bbx	1.36393e-11	0.0950604	0.557	0.491	1.56647e-07	1	Bbx
Hif1a	1.37871e-11	0.0901766	0.628	0.631	1.58345e-07	1	Hif1a
Stat5b	1.39372e-11	0.0891191	0.468	0.414	1.60068e-07	1	Stat5b
Sertad2	1.50147e-11	0.104595	0.365	0.3	1.72444e-07	1	Sertad2
Sphk1	1.50943e-11	0.225722	0.286	0.122	1.73358e-07	1	Sphk1
Pnn	1.56746e-11	-0.238306	0.394	0.572	1.80023e-07	1	Pnn
Aes	1.68773e-11	-0.25819	0.832	0.908	1.93835e-07	1	Aes
Fndc3a	1.71911e-11	0.0746866	0.798	0.772	1.9744e-07	1	Fndc3a
Myh9	1.72087e-11	0.0970803	0.638	0.556	1.97642e-07	1	Myh9
Mbd1	1.74204e-11	0.249004	0.395	0.331	2.00073e-07	1	Mbd1
Creg1	1.85245e-11	0.0765613	0.835	0.769	2.12754e-07	1	Creg1
Hdlbp	1.90262e-11	0.0539965	0.808	0.787	2.18516e-07	1	Hdlbp
Snrk	1.90325e-11	0.1011	0.545	0.498	2.18589e-07	1	Snrk
Lgals3bp	1.9075e-11	0.102831	0.728	0.643	2.19076e-07	1	Lgals3bp
Cyth2	1.90882e-11	0.078855	0.496	0.43	2.19228e-07	1	Cyth2
Ube2w	2.08058e-11	0.0788685	0.536	0.475	2.38954e-07	1	Ube2w
Itga11	2.1147e-11	-0.234493	0.374	0.544	2.42873e-07	1	Itga11
Medag	2.17221e-11	0.0698326	0.868	0.901	2.49479e-07	1	Medag
Col6a3	2.20824e-11	0.133249	0.961	0.896	2.53617e-07	1	Col6a3
Sub1	2.22463e-11	0.0455956	0.849	0.822	2.55499e-07	1	Sub1
Vwa1	2.2936e-11	0.156814	0.7	0.541	2.6342e-07	1	Vwa1
Rpl3	2.31951e-11	-0.225514	1	1	2.66395e-07	1	Rpl3
Ecm2	2.40434e-11	0.0990957	0.713	0.645	2.76138e-07	1	Ecm2
Sulf1	2.52232e-11	-0.278119	0.54	0.662	2.89688e-07	1	Sulf1
Ubc	2.55684e-11	0.120652	0.99	0.996	2.93653e-07	1	Ubc
Dot1l	2.59081e-11	0.143644	0.335	0.231	2.97554e-07	1	Dot1l
1810013L24Rik	2.61239e-11	0.0914379	0.424	0.36	3.00033e-07	1	1810013L24Rik
Samd8	2.68722e-11	0.0970855	0.37	0.301	3.08627e-07	1	Samd8
Rpl10a	2.74488e-11	-0.22745	1	1	3.15249e-07	1	Rpl10a
Tbk1	2.85872e-11	0.095438	0.371	0.298	3.28324e-07	1	Tbk1
Gria3	2.89434e-11	0.148033	0.316	0.197	3.32415e-07	1	Gria3
Unc45b	3.01218e-11	0.12097	0.335	0.224	3.45949e-07	1	Unc45b
Ets1	3.03042e-11	0.104199	0.381	0.276	3.48043e-07	1	Ets1
Vtn	3.04328e-11	0.334734	0.518	0.259	3.4952e-07	1	Vtn
Uap1	3.049e-11	-0.397091	0.737	0.803	3.50178e-07	1	Uap1
Tmem150a	3.11796e-11	0.0934486	0.414	0.337	3.58098e-07	1	Tmem150a
Vdac3	3.28329e-11	-0.23955	0.621	0.747	3.77086e-07	1	Vdac3
Arid2	3.29744e-11	0.0804493	0.479	0.449	3.78711e-07	1	Arid2
Cdkn1a	3.31142e-11	0.236588	0.612	0.567	3.80316e-07	1	Cdkn1a
Plec	3.32332e-11	-0.245511	0.419	0.558	3.81683e-07	1	Plec
Atp8b1	3.36712e-11	0.0981799	0.548	0.467	3.86714e-07	1	Atp8b1
G0s2	3.42306e-11	0.343468	0.596	0.452	3.93139e-07	1	G0s2
Pkig	3.44022e-11	0.0823529	0.433	0.355	3.95109e-07	1	Pkig
Ddx17	3.59084e-11	0.087117	0.826	0.757	4.12408e-07	1	Ddx17
Serf1	3.68845e-11	-0.223387	0.193	0.379	4.23619e-07	1	Serf1
Leprot	3.89579e-11	-0.226326	0.446	0.626	4.47431e-07	1	Leprot
Mme	4.00097e-11	0.133229	0.329	0.229	4.59512e-07	1	Mme
Ppic	4.04037e-11	-0.305572	0.809	0.894	4.64037e-07	1	Ppic
Fyn	4.53073e-11	-0.292752	0.793	0.853	5.20355e-07	1	Fyn
Dap	4.61908e-11	-0.239958	0.518	0.658	5.30501e-07	1	Dap
Pafah1b1	4.78488e-11	0.0368709	0.903	0.876	5.49543e-07	1	Pafah1b1
Nav3	4.87185e-11	0.0924785	0.573	0.529	5.59532e-07	1	Nav3
Tax1bp1	4.88529e-11	0.0342666	0.907	0.911	5.61075e-07	1	Tax1bp1
Gbp7	4.97518e-11	0.127262	0.349	0.289	5.71399e-07	1	Gbp7
Lnpep	5.01431e-11	0.0550084	0.832	0.818	5.75893e-07	1	Lnpep
Pik3ip1	5.76841e-11	-0.229943	0.385	0.551	6.62502e-07	1	Pik3ip1
Fnbp1	5.79078e-11	0.0895659	0.431	0.355	6.65071e-07	1	Fnbp1
Pmepa1	6.05788e-11	-0.308728	0.612	0.739	6.95747e-07	1	Pmepa1
Slk	6.73879e-11	0.0774035	0.637	0.604	7.7395e-07	1	Slk
Sh3bgrl3	6.78395e-11	-0.260929	0.518	0.639	7.79137e-07	1	Sh3bgrl3
Klf7	7.25918e-11	0.0852035	0.773	0.719	8.33716e-07	1	Klf7
Col3a1	7.30254e-11	-0.385079	0.999	0.998	8.38696e-07	1	Col3a1
Plp2	7.33271e-11	-0.218543	0.358	0.524	8.42162e-07	1	Plp2
Adamts12	7.37202e-11	0.126108	0.737	0.604	8.46677e-07	1	Adamts12
Neat1	7.39422e-11	0.127388	0.936	0.914	8.49227e-07	1	Neat1
Tollip	7.52122e-11	0.0848571	0.39	0.327	8.63812e-07	1	Tollip
Pqlc1	8.1583e-11	0.143627	0.313	0.201	9.36981e-07	1	Pqlc1
Sgpl1	8.26997e-11	0.0911806	0.48	0.425	9.49805e-07	1	Sgpl1
AC130815.2	8.59342e-11	0.150608	0.357	0.249	9.86954e-07	1	AC130815.2
Smpdl3a	8.73686e-11	0.0399513	0.925	0.886	1.00343e-06	1	Smpdl3a
Ssfa2	9.45064e-11	0.11443	0.335	0.226	1.08541e-06	1	Ssfa2
Ctsb	1.03354e-10	0.00510004	0.996	0.995	1.18702e-06	1	Ctsb
Osr2	1.04721e-10	0.1838	0.614	0.604	1.20272e-06	1	Osr2
Trp53inp1	1.07884e-10	0.0937328	0.407	0.332	1.23904e-06	1	Trp53inp1
Npepl1	1.08679e-10	-0.238329	0.15	0.337	1.24818e-06	1	Npepl1
Pea15a	1.13224e-10	0.070394	0.681	0.649	1.30038e-06	1	Pea15a
Rorb	1.15197e-10	-0.29044	0.102	0.289	1.32304e-06	1	Rorb
Syncrip	1.1684e-10	0.0728411	0.685	0.634	1.34191e-06	1	Syncrip
St5	1.1966e-10	0.0865761	0.424	0.366	1.37429e-06	1	St5
Plau	1.19908e-10	0.115018	0.9	0.831	1.37715e-06	1	Plau
Ldb1	1.23125e-10	0.0708188	0.596	0.545	1.41409e-06	1	Ldb1
Ski	1.23776e-10	0.0521724	0.793	0.761	1.42156e-06	1	Ski
Bptf	1.34863e-10	0.0519707	0.842	0.815	1.5489e-06	1	Bptf
Dynll2	1.3494e-10	0.0762251	0.504	0.458	1.54978e-06	1	Dynll2
Rpl36	1.39269e-10	-0.216374	1	1	1.5995e-06	1	Rpl36
Gphn	1.48874e-10	0.0965116	0.355	0.27	1.70981e-06	1	Gphn
Serp1	1.54481e-10	0.0763898	0.578	0.557	1.77422e-06	1	Serp1
Clmp	1.58967e-10	0.0784732	0.713	0.679	1.82573e-06	1	Clmp
Wbp11	1.77595e-10	0.074042	0.507	0.48	2.03968e-06	1	Wbp11
Tubb5	1.78047e-10	-0.259567	0.705	0.832	2.04488e-06	1	Tubb5
Ndufs2	1.80091e-10	0.0572722	0.661	0.642	2.06834e-06	1	Ndufs2
Nbr1	1.871e-10	0.0744787	0.524	0.479	2.14885e-06	1	Nbr1
Rnase4	1.89642e-10	-0.0205383	1	1	2.17803e-06	1	Rnase4
Ube2h	1.90297e-10	0.0568123	0.792	0.767	2.18556e-06	1	Ube2h
Gnb4	1.99386e-10	0.100439	0.543	0.409	2.28995e-06	1	Gnb4
Xiap	1.99562e-10	0.0716698	0.649	0.584	2.29197e-06	1	Xiap
Osr1	2.01051e-10	-0.340636	0.507	0.703	2.30907e-06	1	Osr1
Ubr5	2.04026e-10	0.0659476	0.662	0.621	2.34324e-06	1	Ubr5
Sytl2	2.0583e-10	-0.220058	0.244	0.414	2.36396e-06	1	Sytl2
Rbm33	2.06137e-10	0.0761301	0.487	0.416	2.36748e-06	1	Rbm33
Akap12	2.08508e-10	-0.316286	0.859	0.899	2.39471e-06	1	Akap12
Ncoa1	2.09966e-10	0.0719913	0.607	0.559	2.41146e-06	1	Ncoa1
Kmt2e	2.23885e-10	0.0514276	0.865	0.844	2.57132e-06	1	Kmt2e
Sod1	2.26229e-10	0.0598872	0.801	0.761	2.59825e-06	1	Sod1
Khnyn	2.2793e-10	0.123555	0.306	0.206	2.61778e-06	1	Khnyn
Phf20l1	2.28347e-10	0.0788494	0.588	0.529	2.62257e-06	1	Phf20l1
Rxra	2.2992e-10	0.0882114	0.358	0.278	2.64063e-06	1	Rxra
Per1	2.35143e-10	0.0965112	0.521	0.444	2.70062e-06	1	Per1
Mmp11	2.52291e-10	0.225557	0.793	0.563	2.89757e-06	1	Mmp11
Cbx7	2.75355e-10	0.086629	0.37	0.296	3.16245e-06	1	Cbx7
Gk5	2.91748e-10	0.107121	0.337	0.284	3.35073e-06	1	Gk5
Mtus1	2.93062e-10	0.0887109	0.381	0.302	3.36582e-06	1	Mtus1
Gan	2.98655e-10	-0.284876	0.371	0.478	3.43005e-06	1	Gan
Zbtb21	3.01173e-10	0.0953921	0.353	0.269	3.45898e-06	1	Zbtb21
Tbl1x	3.04227e-10	0.0600966	0.712	0.675	3.49405e-06	1	Tbl1x
Taldo1	3.05533e-10	-0.199386	0.335	0.516	3.50905e-06	1	Taldo1
Chchd7	3.07614e-10	0.0965958	0.351	0.273	3.53295e-06	1	Chchd7
Tnrc18	3.28755e-10	0.0644815	0.672	0.632	3.77575e-06	1	Tnrc18
Jarid2	3.33267e-10	0.0974123	0.409	0.341	3.82757e-06	1	Jarid2
Cry2	3.34753e-10	0.0923103	0.47	0.415	3.84464e-06	1	Cry2
Pcolce	3.41821e-10	0.158514	0.808	0.647	3.92582e-06	1	Pcolce
Actn4	3.47243e-10	0.0616266	0.689	0.639	3.98808e-06	1	Actn4
Vezf1	3.56266e-10	0.0712647	0.611	0.57	4.09171e-06	1	Vezf1
Kcnk2	3.85562e-10	0.175645	0.288	0.148	4.42818e-06	1	Kcnk2
Trim56	4.05306e-10	0.0913928	0.395	0.353	4.65494e-06	1	Trim56
Steap3	4.20285e-10	-0.285107	0.741	0.846	4.82697e-06	1	Steap3
Cul1	4.2681e-10	0.0627322	0.662	0.636	4.90191e-06	1	Cul1
Akirin1	4.37272e-10	0.0806105	0.396	0.338	5.02207e-06	1	Akirin1
Arhgef28	4.43024e-10	-0.238649	0.154	0.333	5.08814e-06	1	Arhgef28
Phlda3	4.52925e-10	-0.226412	0.219	0.378	5.20185e-06	1	Phlda3
Raph1	4.60035e-10	0.116847	0.633	0.544	5.2835e-06	1	Raph1
Ankhd1	4.66599e-10	0.0727251	0.494	0.447	5.35889e-06	1	Ankhd1
Ldhb	4.70915e-10	0.0958851	0.441	0.358	5.40846e-06	1	Ldhb
Eif5a	4.75805e-10	0.0383999	0.864	0.874	5.46463e-06	1	Eif5a
Mrpl52	5.02112e-10	-0.246922	0.764	0.849	5.76676e-06	1	Mrpl52
Tspan4	5.10573e-10	0.0895093	0.576	0.523	5.86393e-06	1	Tspan4
Rps4x	5.35818e-10	-0.210822	1	1	6.15387e-06	1	Rps4x
Lamb1	5.43097e-10	0.0345962	0.975	0.967	6.23747e-06	1	Lamb1
Fbln2	5.49808e-10	0.0385391	0.982	0.984	6.31454e-06	1	Fbln2
Slc48a1	5.56097e-10	0.0823063	0.466	0.394	6.38677e-06	1	Slc48a1
Rpl7	6.06377e-10	-0.216648	1	1	6.96423e-06	1	Rpl7
Myadm	6.07655e-10	0.0797515	0.851	0.826	6.97892e-06	1	Myadm
Rsrc2	6.09514e-10	0.059889	0.84	0.806	7.00027e-06	1	Rsrc2
Mapk8	6.16067e-10	0.0851867	0.41	0.356	7.07553e-06	1	Mapk8
Atp6v1a	6.46332e-10	0.0775782	0.571	0.502	7.42312e-06	1	Atp6v1a
Maged2	6.95604e-10	-0.230075	0.311	0.448	7.98901e-06	1	Maged2
Usp48	6.95927e-10	0.0808466	0.429	0.342	7.99272e-06	1	Usp48
Vasn	7.35414e-10	-0.311036	0.527	0.623	8.44623e-06	1	Vasn
Rora	7.41456e-10	0.0641569	0.813	0.792	8.51563e-06	1	Rora
Nek7	7.57966e-10	0.0618736	0.616	0.571	8.70524e-06	1	Nek7
Usp8	7.86733e-10	0.0681246	0.555	0.52	9.03563e-06	1	Usp8
Ppp1cc	8.21405e-10	0.038552	0.818	0.795	9.43384e-06	1	Ppp1cc
Prex2	8.27097e-10	0.0982971	0.379	0.279	9.49921e-06	1	Prex2
Cycs	8.41294e-10	0.0742282	0.479	0.443	9.66226e-06	1	Cycs
Utrn	8.65717e-10	-0.241231	0.513	0.637	9.94276e-06	1	Utrn
Cpsf7	8.83247e-10	0.0739009	0.436	0.384	1.01441e-05	1	Cpsf7
Mrps18a	9.02214e-10	-0.198796	0.382	0.531	1.03619e-05	1	Mrps18a
Rpl23	9.47299e-10	-0.205892	1	1	1.08797e-05	1	Rpl23
Ddx21	9.80954e-10	0.0880091	0.432	0.364	1.12663e-05	1	Ddx21
Sec31a	9.89299e-10	0.0602293	0.69	0.65	1.13621e-05	1	Sec31a
H2-D1	1.04707e-09	0.0408227	1	1	1.20256e-05	1	H2-D1
Kmt5a	1.05334e-09	-0.239128	0.128	0.321	1.20977e-05	1	Kmt5a
Nr2f2	1.0596e-09	0.132606	0.576	0.427	1.21695e-05	1	Nr2f2
Nfe2l1	1.07936e-09	0.0569701	0.693	0.658	1.23965e-05	1	Nfe2l1
Serf2	1.09666e-09	-0.263091	0.994	0.998	1.25951e-05	1	Serf2
Dynll1	1.10924e-09	-0.287355	0.806	0.879	1.27397e-05	1	Dynll1
Tpbgl	1.11953e-09	0.119213	0.319	0.206	1.28578e-05	1	Tpbgl
Isg20	1.24565e-09	0.0972615	0.342	0.257	1.43063e-05	1	Isg20
Mzt2	1.25584e-09	0.0846867	0.358	0.311	1.44233e-05	1	Mzt2
Zfp207	1.28906e-09	0.0605576	0.63	0.599	1.48049e-05	1	Zfp207
Gsk3a	1.36837e-09	0.0751638	0.428	0.41	1.57157e-05	1	Gsk3a
Clta	1.36861e-09	-0.24134	0.896	0.938	1.57185e-05	1	Clta
Mcm4	1.39695e-09	0.145223	0.29	0.17	1.60439e-05	1	Mcm4
Rc3h1	1.46688e-09	0.0687105	0.567	0.525	1.68471e-05	1	Rc3h1
Zbtb4	1.51439e-09	0.06448	0.639	0.594	1.73928e-05	1	Zbtb4
Mmp14	1.60227e-09	0.0369891	0.971	0.953	1.8402e-05	1	Mmp14
Fgl2	1.63679e-09	0.251604	0.531	0.482	1.87985e-05	1	Fgl2
Gab2	1.68343e-09	0.0755473	0.418	0.355	1.93342e-05	1	Gab2
Aldh7a1	1.71219e-09	-0.219471	0.496	0.655	1.96645e-05	1	Aldh7a1
Eif3j1	1.73096e-09	0.0595766	0.647	0.599	1.988e-05	1	Eif3j1
Aldh1a1	1.74028e-09	0.0722069	0.654	0.568	1.99872e-05	1	Aldh1a1
Bag5	1.74226e-09	-0.194692	0.304	0.468	2.00098e-05	1	Bag5
Mef2d	1.83312e-09	0.068867	0.567	0.513	2.10534e-05	1	Mef2d
Lgalsl	1.90933e-09	0.107255	0.313	0.25	2.19287e-05	1	Lgalsl
Tbc1d2b	1.92685e-09	0.065492	0.543	0.491	2.21299e-05	1	Tbc1d2b
Duoxa1	2.00904e-09	-0.313923	0.022	0.255	2.30738e-05	1	Duoxa1
H13	2.06189e-09	0.0606244	0.614	0.594	2.36808e-05	1	H13
Arpc3	2.06843e-09	0.0215004	0.909	0.877	2.3756e-05	1	Arpc3
AC149090.1	2.09303e-09	-0.219409	0.376	0.536	2.40384e-05	1	AC149090.1
Rpl39	2.11511e-09	-0.215247	1	1	2.42921e-05	1	Rpl39
Pura	2.15127e-09	0.0291027	0.881	0.857	2.47074e-05	1	Pura
Hmgn3	2.16372e-09	-0.254067	0.107	0.3	2.48503e-05	1	Hmgn3
Ube2m	2.20657e-09	-0.197991	0.379	0.537	2.53425e-05	1	Ube2m
Rrs1	2.25655e-09	0.0988389	0.372	0.319	2.59165e-05	1	Rrs1
Dab2	2.26212e-09	0.0986505	0.476	0.459	2.59805e-05	1	Dab2
Gna12	2.31618e-09	0.0690562	0.421	0.366	2.66013e-05	1	Gna12
Ddx24	2.38364e-09	0.0570558	0.649	0.618	2.73761e-05	1	Ddx24
Emp2	2.44121e-09	0.0903894	0.375	0.286	2.80373e-05	1	Emp2
Arcn1	2.44672e-09	0.0572411	0.672	0.663	2.81006e-05	1	Arcn1
Pla2g4a	2.49464e-09	-0.205967	0.233	0.405	2.86509e-05	1	Pla2g4a
Hotairm1	2.50378e-09	0.115207	0.297	0.204	2.87559e-05	1	Hotairm1
Sec23b	2.51121e-09	0.124504	0.29	0.195	2.88412e-05	1	Sec23b
Slit2	2.51282e-09	0.121852	0.353	0.257	2.88597e-05	1	Slit2
Eif6	2.51645e-09	0.0604554	0.544	0.544	2.89014e-05	1	Eif6
Nfyb	2.53241e-09	0.0833281	0.347	0.322	2.90847e-05	1	Nfyb
Cul3	2.73443e-09	0.0498652	0.666	0.632	3.14049e-05	1	Cul3
Ndufb2	2.74469e-09	0.0496398	0.652	0.642	3.15228e-05	1	Ndufb2
Tbc1d10a	2.8294e-09	0.0712362	0.393	0.336	3.24957e-05	1	Tbc1d10a
Pros1	2.89569e-09	0.0348592	0.898	0.86	3.32569e-05	1	Pros1
Psme4	2.904e-09	0.0736452	0.49	0.42	3.33524e-05	1	Psme4
Slc43a1	2.93502e-09	0.118315	0.307	0.202	3.37087e-05	1	Slc43a1
Plekhh2	2.95812e-09	0.0802217	0.536	0.469	3.39741e-05	1	Plekhh2
Kctd20	3.00243e-09	0.0680215	0.463	0.408	3.44829e-05	1	Kctd20
Eif3j2	3.00505e-09	0.143537	0.288	0.174	3.45129e-05	1	Eif3j2
Sec16a	3.07501e-09	0.0748501	0.379	0.304	3.53165e-05	1	Sec16a
Jmy	3.10444e-09	0.0731393	0.409	0.341	3.56545e-05	1	Jmy
Sec14l1	3.3017e-09	-0.217755	0.418	0.572	3.792e-05	1	Sec14l1
Ccdc80	3.32318e-09	0.0506113	0.971	0.922	3.81667e-05	1	Ccdc80
Gulp1	3.38651e-09	0.0627167	0.565	0.528	3.88941e-05	1	Gulp1
Ech1	3.62957e-09	0.0537041	0.883	0.818	4.16856e-05	1	Ech1
Rbm27	3.67339e-09	0.0721311	0.421	0.379	4.21889e-05	1	Rbm27
2900097C17Rik	3.8327e-09	0.0431073	0.724	0.71	4.40185e-05	1	2900097C17Rik
Trim25	3.86073e-09	0.109432	0.291	0.231	4.43405e-05	1	Trim25
Carhsp1	4.01134e-09	-0.206893	0.382	0.536	4.60702e-05	1	Carhsp1
Cd47	4.02143e-09	-0.265274	0.997	0.999	4.61861e-05	1	Cd47
Uri1	4.08746e-09	0.0673652	0.473	0.425	4.69445e-05	1	Uri1
Vamp2	4.13761e-09	0.0682733	0.478	0.452	4.75205e-05	1	Vamp2
Akap11	4.21266e-09	0.0702022	0.447	0.405	4.83824e-05	1	Akap11
Ankrd17	4.21955e-09	0.0604468	0.67	0.63	4.84615e-05	1	Ankrd17
Gfpt2	4.38422e-09	-0.382033	0.878	0.821	5.03527e-05	1	Gfpt2
Gm26802	4.4315e-09	-0.291695	0.182	0.276	5.08958e-05	1	Gm26802
4932438A13Rik	4.48995e-09	0.0697605	0.551	0.519	5.1567e-05	1	4932438A13Rik
Slc6a8	4.54122e-09	0.0723835	0.402	0.345	5.21559e-05	1	Slc6a8
Gpsm3	4.57282e-09	-0.203331	0.388	0.546	5.25188e-05	1	Gpsm3
Pcbp1	4.62898e-09	0.0420966	0.798	0.782	5.31638e-05	1	Pcbp1
Ak3	4.70017e-09	0.0691819	0.611	0.564	5.39815e-05	1	Ak3
Dennd2a	4.77509e-09	0.0663531	0.504	0.487	5.4842e-05	1	Dennd2a
Map1lc3a	4.78035e-09	0.0290222	0.896	0.865	5.49023e-05	1	Map1lc3a
Gabra3	4.78592e-09	0.0930813	0.541	0.524	5.49663e-05	1	Gabra3
Capg	4.80783e-09	-0.243478	0.647	0.755	5.52179e-05	1	Capg
Calm3	5.14986e-09	0.0368234	0.773	0.755	5.91461e-05	1	Calm3
Tmem106b	5.18784e-09	0.0507053	0.741	0.705	5.95823e-05	1	Tmem106b
Fat1	5.19352e-09	0.090436	0.47	0.406	5.96475e-05	1	Fat1
Synm	5.21815e-09	0.149302	0.273	0.171	5.99304e-05	1	Synm
Stau1	5.24726e-09	0.0666344	0.432	0.391	6.02648e-05	1	Stau1
Aldh2	5.28111e-09	-0.00323017	0.976	0.972	6.06536e-05	1	Aldh2
Cldn15	5.32868e-09	0.127978	0.324	0.186	6.11999e-05	1	Cldn15
Tnfsf12	5.58952e-09	0.0471817	0.71	0.698	6.41956e-05	1	Tnfsf12
Safb2	5.63627e-09	0.0725554	0.525	0.463	6.47326e-05	1	Safb2
Rpl35a	5.68986e-09	-0.113058	1	1	6.53481e-05	1	Rpl35a
Fzd2	6.0457e-09	-0.20347	0.333	0.518	6.94349e-05	1	Fzd2
Cst3	6.17472e-09	0.0279826	0.996	0.999	7.09166e-05	1	Cst3
Fads6	6.21371e-09	0.116916	0.321	0.199	7.13644e-05	1	Fads6
Ccl7	6.37621e-09	0.436455	0.567	0.372	7.32307e-05	1	Ccl7
Pgd	6.64263e-09	-0.187986	0.311	0.471	7.62906e-05	1	Pgd
Inpp5a	6.76156e-09	0.100186	0.31	0.214	7.76565e-05	1	Inpp5a
Trim47	6.9226e-09	0.0988927	0.379	0.355	7.95061e-05	1	Trim47
Scaf11	7.23656e-09	0.0478876	0.781	0.741	8.31119e-05	1	Scaf11
Pcdh7	7.24843e-09	0.0948344	0.573	0.49	8.32482e-05	1	Pcdh7
Acap2	7.50915e-09	0.053342	0.658	0.671	8.62426e-05	1	Acap2
Amotl1	7.58925e-09	0.0478055	0.741	0.716	8.71625e-05	1	Amotl1
Rpl22l1	8.20281e-09	-0.0398741	0.997	0.996	9.42093e-05	1	Rpl22l1
Wapl	8.25734e-09	0.0540584	0.605	0.576	9.48355e-05	1	Wapl
Ccdc12	8.46863e-09	-0.212014	0.515	0.663	9.72622e-05	1	Ccdc12
Sntb2	8.81306e-09	0.0145209	0.893	0.908	0.000101218	1	Sntb2
mt-Nd5	8.84852e-09	-0.00975406	0.987	0.989	0.000101625	1	mt-Nd5
Ppp2r5a	8.92475e-09	0.0593147	0.524	0.506	0.000102501	1	Ppp2r5a
Ncor1	9.01133e-09	0.0343304	0.874	0.859	0.000103495	1	Ncor1
Relb	9.32443e-09	0.085178	0.333	0.272	0.000107091	1	Relb
Rtp4	9.56921e-09	0.133203	0.281	0.197	0.000109902	1	Rtp4
Cdc42se1	9.65635e-09	0.0634474	0.469	0.455	0.000110903	1	Cdc42se1
Tmem43	9.65852e-09	-0.199063	0.386	0.534	0.000110928	1	Tmem43
Ppp4r2	9.69868e-09	0.0441048	0.695	0.668	0.000111389	1	Ppp4r2
Erbin	9.7482e-09	0.0565304	0.591	0.558	0.000111958	1	Erbin
Atpif1	9.81227e-09	-0.244573	0.832	0.902	0.000112694	1	Atpif1
Arhgap21	9.89624e-09	0.0648107	0.61	0.568	0.000113658	1	Arhgap21
Reps2	1.01625e-08	0.101564	0.311	0.226	0.000116716	1	Reps2
Etnk1	1.06365e-08	0.0720158	0.464	0.43	0.00012216	1	Etnk1
Map3k6	1.07584e-08	0.117066	0.297	0.203	0.00012356	1	Map3k6
Pxdn	1.11473e-08	0.0548527	0.79	0.751	0.000128027	1	Pxdn
Pdlim7	1.14228e-08	0.0638398	0.521	0.491	0.000131191	1	Pdlim7
Rpl32	1.19399e-08	-0.205609	1	1	0.00013713	1	Rpl32
Ctsa	1.20779e-08	0.0563917	0.647	0.622	0.000138715	1	Ctsa
Sp1	1.24027e-08	0.0582264	0.602	0.591	0.000142445	1	Sp1
Ripor1	1.26125e-08	0.0779921	0.339	0.295	0.000144855	1	Ripor1
Mospd1	1.26999e-08	0.0828767	0.344	0.278	0.000145859	1	Mospd1
Gramd4	1.39105e-08	0.0935776	0.318	0.23	0.000159762	1	Gramd4
Pygl	1.50344e-08	-0.21053	0.398	0.554	0.00017267	1	Pygl
Rbmxl1	1.52274e-08	0.0608765	0.407	0.378	0.000174886	1	Rbmxl1
Snhg18	1.53922e-08	0.0508794	0.846	0.783	0.000176779	1	Snhg18
Adipor1	1.53985e-08	0.0566856	0.593	0.561	0.000176852	1	Adipor1
Usp3	1.59276e-08	0.0690911	0.412	0.342	0.000182929	1	Usp3
Nt5c2	1.59356e-08	0.0898237	0.318	0.24	0.00018302	1	Nt5c2
Tceal9	1.60062e-08	0.0455336	0.784	0.759	0.000183831	1	Tceal9
Elmod2	1.63474e-08	0.122305	0.281	0.191	0.00018775	1	Elmod2
Zrsr2	1.67673e-08	0.0686778	0.454	0.394	0.000192572	1	Zrsr2
Calcrl	1.67873e-08	-0.228983	0.254	0.357	0.000192802	1	Calcrl
Zim1	1.6806e-08	0.246212	0.249	0.083	0.000193017	1	Zim1
S100a16	1.68563e-08	-0.258652	0.887	0.91	0.000193594	1	S100a16
Dyrk1a	1.69298e-08	0.0692957	0.394	0.332	0.000194439	1	Dyrk1a
Prrx1	1.82517e-08	-0.270552	0.925	0.963	0.000209621	1	Prrx1
Akr1c18	1.86882e-08	-0.525974	0.005	0.146	0.000214634	1	Akr1c18
Ptbp3	1.88806e-08	0.0490267	0.708	0.682	0.000216844	1	Ptbp3
Egr3	2.05536e-08	0.170685	0.286	0.147	0.000236059	1	Egr3
H1f0	2.08137e-08	0.12679	0.463	0.406	0.000239045	1	H1f0
Svil	2.09232e-08	0.0554202	0.705	0.679	0.000240303	1	Svil
Akr1b8	2.09349e-08	-0.211122	0.297	0.429	0.000240437	1	Akr1b8
Dock10	2.09454e-08	0.0989841	0.304	0.232	0.000240557	1	Dock10
Spty2d1	2.15968e-08	0.063671	0.52	0.47	0.00024804	1	Spty2d1
mt-Nd4	2.18542e-08	-0.0478383	1	1	0.000250995	1	mt-Nd4
Dhx9	2.1902e-08	0.0636665	0.51	0.447	0.000251544	1	Dhx9
Kdm5a	2.2099e-08	0.0597543	0.579	0.549	0.000253807	1	Kdm5a
Tmbim1	2.23038e-08	0.0576461	0.621	0.584	0.000256159	1	Tmbim1
Atp6v1e1	2.24815e-08	-0.244093	0.673	0.77	0.0002582	1	Atp6v1e1
Gaa	2.31697e-08	0.0495137	0.714	0.659	0.000266105	1	Gaa
Ago2	2.3308e-08	0.057261	0.543	0.52	0.000267692	1	Ago2
Chmp4b	2.37059e-08	0.0170097	0.853	0.849	0.000272262	1	Chmp4b
Samd4	2.38873e-08	0.0691264	0.438	0.389	0.000274346	1	Samd4
Nsa2	2.39815e-08	-0.240594	0.841	0.9	0.000275427	1	Nsa2
Mapre1	2.41942e-08	0.0370371	0.789	0.764	0.000277871	1	Mapre1
Zyx	2.4863e-08	-0.283777	0.71	0.771	0.000285552	1	Zyx
Elof1	2.58484e-08	-0.181536	0.349	0.511	0.000296868	1	Elof1
Mylip	2.63108e-08	-0.216822	0.294	0.391	0.00030218	1	Mylip
Kdelc2	2.683e-08	-0.223469	0.513	0.651	0.000308142	1	Kdelc2
2020-03-05	2.70285e-08	0.0577763	0.501	0.483	0.000310422	1	2020-03-05
Sec61a1	2.72508e-08	0.0547729	0.602	0.556	0.000312976	1	Sec61a1
Slc16a9	2.75283e-08	-0.224843	0.255	0.381	0.000316163	1	Slc16a9
Ifitm2	2.81204e-08	-0.0171223	1	0.999	0.000322962	1	Ifitm2
Ypel3	2.88224e-08	0.00870097	0.924	0.909	0.000331025	1	Ypel3
Ntrk3	2.89904e-08	-0.27742	0.072	0.263	0.000332954	1	Ntrk3
Elmsan1	2.97818e-08	0.0741113	0.428	0.36	0.000342044	1	Elmsan1
Ikzf4	2.97947e-08	0.28253	0.247	0.062	0.000342192	1	Ikzf4
Adam23	2.9945e-08	0.100321	0.507	0.419	0.000343918	1	Adam23
Sulf2	3.00571e-08	-0.249048	0.559	0.688	0.000345206	1	Sulf2
Ppp1r9b	3.16976e-08	0.0615591	0.428	0.38	0.000364047	1	Ppp1r9b
Dda1	3.17372e-08	0.0591617	0.417	0.369	0.000364502	1	Dda1
Scd2	3.19097e-08	-0.20887	0.28	0.424	0.000366483	1	Scd2
Gpbp1	3.19451e-08	0.0506752	0.583	0.537	0.00036689	1	Gpbp1
Casp12	3.1961e-08	0.0572522	0.638	0.585	0.000367072	1	Casp12
Ndel1	3.2515e-08	0.0538011	0.682	0.62	0.000373435	1	Ndel1
Saraf	3.25951e-08	0.0373612	0.665	0.675	0.000374354	1	Saraf
Il17d	3.35752e-08	0.0800374	0.337	0.273	0.000385611	1	Il17d
Pcmtd1	3.51622e-08	0.0419914	0.698	0.694	0.000403838	1	Pcmtd1
Chd1	3.51994e-08	0.0637382	0.447	0.394	0.000404265	1	Chd1
Impdh2	3.66843e-08	0.0472073	0.576	0.549	0.000421319	1	Impdh2
Tbcel	3.78586e-08	0.0726198	0.343	0.293	0.000434806	1	Tbcel
Tmem245	3.80837e-08	0.0740004	0.423	0.371	0.000437391	1	Tmem245
Oaz2	3.85083e-08	0.0433541	0.587	0.578	0.000442268	1	Oaz2
Tnks2	3.98858e-08	0.0487301	0.639	0.601	0.000458089	1	Tnks2
Bmpr1a	4.02227e-08	0.0452833	0.693	0.665	0.000461958	1	Bmpr1a
Degs1	4.19845e-08	0.0340816	0.724	0.712	0.000482192	1	Degs1
Stk3	4.21022e-08	0.0595147	0.455	0.401	0.000483544	1	Stk3
Ahcyl1	4.28931e-08	0.0469131	0.671	0.642	0.000492627	1	Ahcyl1
Rab18	4.3001e-08	0.0193712	0.841	0.827	0.000493867	1	Rab18
Twist2	4.30922e-08	0.072276	0.407	0.345	0.000494914	1	Twist2
Inhbb	4.34007e-08	-0.244926	0.169	0.31	0.000498457	1	Inhbb
Npr1	4.4179e-08	-0.223921	0.557	0.694	0.000507396	1	Npr1
Fgf18	4.49373e-08	-0.287214	0.028	0.254	0.000516105	1	Fgf18
Uqcrh	4.61426e-08	-0.0425651	0.995	0.994	0.000529948	1	Uqcrh
Brd4	4.62813e-08	0.0456206	0.657	0.647	0.000531541	1	Brd4
Elk4	4.64579e-08	0.0530215	0.513	0.463	0.00053357	1	Elk4
Mef2c	4.74044e-08	-0.217369	0.194	0.333	0.000544439	1	Mef2c
Son	4.75422e-08	0.00154859	0.987	0.983	0.000546022	1	Son
Ash1l	4.83395e-08	0.0325637	0.827	0.794	0.000555179	1	Ash1l
Ythdf3	4.8773e-08	0.0543905	0.492	0.453	0.000560158	1	Ythdf3
Ubap2l	4.94943e-08	0.032258	0.788	0.777	0.000568442	1	Ubap2l
Tgfb2	4.96715e-08	-0.23149	0.278	0.454	0.000570477	1	Tgfb2
Eif2s3x	5.2484e-08	0.0463573	0.61	0.575	0.000602779	1	Eif2s3x
Wipi1	5.43944e-08	0.0406076	0.788	0.757	0.00062472	1	Wipi1
Fam53c	5.67338e-08	0.0740408	0.342	0.28	0.000651588	1	Fam53c
Zfc3h1	5.78893e-08	0.0755759	0.408	0.397	0.000664859	1	Zfc3h1
Ell	5.99829e-08	0.0813557	0.32	0.241	0.000688904	1	Ell
Piga	6.00188e-08	0.11582	0.294	0.192	0.000689316	1	Piga
Lpin1	6.01915e-08	0.0831209	0.335	0.269	0.0006913	1	Lpin1
Ece1	6.06894e-08	0.0368777	0.762	0.733	0.000697018	1	Ece1
Lum	6.30232e-08	0.0266453	1	0.991	0.000723822	1	Lum
Fhl1	6.3554e-08	-0.23287	0.559	0.675	0.000729918	1	Fhl1
Hivep2	6.44992e-08	0.0527557	0.696	0.642	0.000740774	1	Hivep2
Foxo3	6.56086e-08	0.0630936	0.366	0.336	0.000753514	1	Foxo3
Ubr2	6.73389e-08	0.0510967	0.579	0.539	0.000773387	1	Ubr2
H2-K1	6.85429e-08	0.0348283	0.995	0.993	0.000787216	1	H2-K1
Picalm	7.05947e-08	0.0344611	0.756	0.73	0.00081078	1	Picalm
Ndufa4l2	7.15903e-08	0.146722	0.281	0.146	0.000822215	1	Ndufa4l2
Lrrc8b	7.46076e-08	-0.250226	0.08	0.276	0.000856868	1	Lrrc8b
Strap	7.50218e-08	0.0390688	0.607	0.587	0.000861626	1	Strap
Fgf7	7.5593e-08	0.0750388	0.388	0.308	0.000868185	1	Fgf7
Txlna	7.64861e-08	0.0681685	0.337	0.287	0.000878443	1	Txlna
Tbcb	7.82488e-08	-0.180618	0.367	0.526	0.000898688	1	Tbcb
Tbc1d9b	7.85252e-08	0.0558484	0.435	0.393	0.000901862	1	Tbc1d9b
Col6a1	7.91013e-08	0.0319306	0.996	0.994	0.000908479	1	Col6a1
Elob	7.93736e-08	-0.234924	0.939	0.966	0.000911606	1	Elob
Tsc22d3	8.10488e-08	-0.247227	0.416	0.533	0.000930846	1	Tsc22d3
Mark2	8.28799e-08	0.0568121	0.487	0.436	0.000951876	1	Mark2
Zfp148	8.35599e-08	0.04649	0.634	0.605	0.000959685	1	Zfp148
Msc	8.42871e-08	0.14937	0.429	0.325	0.000968038	1	Msc
Rab3il1	8.44503e-08	-0.183898	0.333	0.49	0.000969912	1	Rab3il1
Serinc1	8.49017e-08	-0.0015886	0.957	0.936	0.000975096	1	Serinc1
Scoc	8.57237e-08	0.0527924	0.483	0.479	0.000984537	1	Scoc
Vldlr	8.80368e-08	-0.264362	0.642	0.768	0.0010111	1	Vldlr
Vegfa	8.83301e-08	-0.274046	0.348	0.488	0.00101447	1	Vegfa
Gpr1	9.00652e-08	-0.319627	0.017	0.229	0.0010344	1	Gpr1
Smg1	9.57648e-08	0.0532935	0.597	0.525	0.00109986	1	Smg1
Map3k2	9.88791e-08	0.0550262	0.534	0.481	0.00113563	1	Map3k2
Papss2	9.92821e-08	0.0840617	0.31	0.249	0.00114026	1	Papss2
Igfbp3	9.98928e-08	0.343306	0.513	0.398	0.00114727	1	Igfbp3
Ppl	1.01271e-07	0.108991	0.316	0.209	0.0011631	1	Ppl
Tcf7l2	1.02407e-07	0.0481357	0.706	0.684	0.00117615	1	Tcf7l2
Nenf	1.0462e-07	-0.225351	0.981	0.99	0.00120156	1	Nenf
Phax	1.04672e-07	-0.181358	0.355	0.502	0.00120216	1	Phax
Csnk1e	1.04884e-07	0.0355859	0.695	0.671	0.00120459	1	Csnk1e
Tpm4	1.19498e-07	0.0335359	0.752	0.729	0.00137244	1	Tpm4
Ewsr1	1.20269e-07	0.0353523	0.685	0.666	0.00138129	1	Ewsr1
Plk3	1.20416e-07	0.129676	0.283	0.159	0.00138297	1	Plk3
Copb2	1.22278e-07	0.0357989	0.659	0.642	0.00140436	1	Copb2
Cxcl16	1.26425e-07	0.0867248	0.429	0.308	0.00145199	1	Cxcl16
Edem2	1.26493e-07	-0.178895	0.285	0.424	0.00145277	1	Edem2
Ubr1	1.27085e-07	0.0595285	0.47	0.405	0.00145957	1	Ubr1
Stat2	1.27773e-07	0.0813193	0.353	0.278	0.00146747	1	Stat2
Pfdn5	1.27936e-07	-0.221039	0.98	0.993	0.00146935	1	Pfdn5
Ube2b	1.3168e-07	0.00510082	0.882	0.881	0.00151234	1	Ube2b
Kirrel	1.33606e-07	0.0341144	0.776	0.733	0.00153446	1	Kirrel
Gpx7	1.33705e-07	-0.185391	0.37	0.516	0.0015356	1	Gpx7
Tuba1a	1.351e-07	0.0152712	0.949	0.964	0.00155162	1	Tuba1a
Mia2	1.35795e-07	0.0495752	0.513	0.502	0.00155961	1	Mia2
Trim30d	1.37088e-07	-0.242807	0.113	0.282	0.00157446	1	Trim30d
Ostc	1.37338e-07	-0.215656	0.668	0.79	0.00157733	1	Ostc
Hmgcs2	1.39656e-07	0.0852997	0.682	0.571	0.00160395	1	Hmgcs2
Tbc1d12	1.40068e-07	-0.184088	0.248	0.394	0.00160868	1	Tbc1d12
Ntf3	1.40472e-07	0.133194	0.288	0.16	0.00161332	1	Ntf3
Unc45a	1.41691e-07	0.0974925	0.276	0.21	0.00162732	1	Unc45a
Uap1l1	1.43205e-07	0.0578548	0.416	0.38	0.00164471	1	Uap1l1
Nsg1	1.4401e-07	-0.195255	0.409	0.55	0.00165396	1	Nsg1
Phldb2	1.4441e-07	0.0766945	0.362	0.3	0.00165855	1	Phldb2
Slc38a2	1.44967e-07	0.0466735	0.855	0.854	0.00166495	1	Slc38a2
Ddi2	1.48751e-07	0.069949	0.33	0.297	0.0017084	1	Ddi2
Serpinf1	1.49658e-07	0.0048022	0.999	0.995	0.00171882	1	Serpinf1
Sema3b	1.50591e-07	-0.198324	0.177	0.344	0.00172954	1	Sema3b
Eif4e3	1.54983e-07	0.0911176	0.297	0.212	0.00177998	1	Eif4e3
Ubr3	1.56613e-07	0.0554439	0.431	0.39	0.0017987	1	Ubr3
Nbeal1	1.60864e-07	0.0414074	0.775	0.748	0.00184752	1	Nbeal1
Armcx3	1.63041e-07	0.0472462	0.539	0.516	0.00187253	1	Armcx3
Bcl6	1.6477e-07	0.0725199	0.374	0.323	0.00189238	1	Bcl6
Zfp592	1.66328e-07	0.0653414	0.386	0.325	0.00191028	1	Zfp592
Ubqln2	1.68859e-07	0.0568709	0.41	0.374	0.00193934	1	Ubqln2
B4galt5	1.6982e-07	0.0721687	0.362	0.322	0.00195038	1	B4galt5
Peli2	1.6996e-07	0.0554439	0.437	0.386	0.00195199	1	Peli2
Rab2a	1.70327e-07	0.00462112	0.901	0.889	0.00195621	1	Rab2a
Nipa2	1.74075e-07	0.0582038	0.418	0.353	0.00199925	1	Nipa2
Gtf2a2	1.75504e-07	0.0353752	0.612	0.597	0.00201567	1	Gtf2a2
Oxct1	1.77953e-07	0.0610331	0.498	0.476	0.00204378	1	Oxct1
Usp34	1.78855e-07	0.0433803	0.644	0.625	0.00205415	1	Usp34
Klf10	1.80913e-07	-0.201145	0.183	0.354	0.00207779	1	Klf10
Dnajb9	1.82859e-07	0.048729	0.568	0.577	0.00210013	1	Dnajb9
Lasp1	1.84575e-07	0.0320638	0.722	0.698	0.00211985	1	Lasp1
Zfp703	1.8609e-07	0.0760024	0.371	0.37	0.00213724	1	Zfp703
Trpc1	2.0012e-07	0.0695986	0.361	0.303	0.00229838	1	Trpc1
D430042O09Rik	2.03157e-07	0.0844082	0.315	0.248	0.00233326	1	D430042O09Rik
Aimp1	2.08337e-07	-0.20245	0.54	0.668	0.00239275	1	Aimp1
Tshz3	2.10165e-07	0.0621431	0.4	0.351	0.00241375	1	Tshz3
Chtop	2.16293e-07	0.0461329	0.526	0.503	0.00248412	1	Chtop
Lysmd3	2.2264e-07	0.0594931	0.502	0.47	0.00255702	1	Lysmd3
Katna1	2.23218e-07	0.076907	0.313	0.244	0.00256366	1	Katna1
Acss3	2.30722e-07	0.0695884	0.529	0.471	0.00264985	1	Acss3
Azi2	2.32446e-07	0.0524845	0.463	0.429	0.00266964	1	Azi2
Gstt2	2.32612e-07	0.138266	0.611	0.483	0.00267155	1	Gstt2
Lpp	2.32919e-07	0.0197149	0.85	0.835	0.00267508	1	Lpp
Plekha4	2.3836e-07	0.0883006	0.296	0.224	0.00273756	1	Plekha4
Sec61b	2.40614e-07	-0.213507	0.694	0.811	0.00276345	1	Sec61b
Baz1a	2.41061e-07	0.108482	0.273	0.192	0.00276859	1	Baz1a
Prkca	2.41828e-07	-0.183947	0.257	0.406	0.0027774	1	Prkca
Rpl36al	2.49819e-07	-0.228282	0.802	0.858	0.00286917	1	Rpl36al
Clip4	2.502e-07	-0.195879	0.194	0.359	0.00287354	1	Clip4
Parp3	2.52585e-07	0.0507972	0.559	0.533	0.00290094	1	Parp3
Itm2c	2.53596e-07	0.00991611	0.893	0.865	0.00291255	1	Itm2c
Zhx3	2.54881e-07	0.059266	0.409	0.369	0.00292731	1	Zhx3
Hnrnpl	2.57052e-07	0.0434864	0.649	0.623	0.00295225	1	Hnrnpl
Ifit1	2.58584e-07	0.303578	0.142	0.105	0.00296983	1	Ifit1
Kng2	2.63351e-07	0.144798	0.296	0.143	0.00302459	1	Kng2
Ppme1	2.64057e-07	0.0905038	0.282	0.217	0.0030327	1	Ppme1
Plxna1	2.67426e-07	-0.181246	0.255	0.401	0.00307139	1	Plxna1
Tslp	2.71051e-07	0.119941	0.262	0.18	0.00311302	1	Tslp
Vps54	2.72159e-07	0.0680257	0.323	0.262	0.00312575	1	Vps54
Nfkb2	2.74335e-07	0.0969679	0.296	0.196	0.00315073	1	Nfkb2
Gas6	2.76512e-07	0.161835	0.455	0.291	0.00317574	1	Gas6
Slfn8	2.86625e-07	0.144639	0.253	0.151	0.00329189	1	Slfn8
Zfp106	2.87274e-07	0.0463804	0.502	0.471	0.00329934	1	Zfp106
Rpl24	2.87651e-07	-0.205591	1	1	0.00330367	1	Rpl24
Emilin1	2.92756e-07	0.0600505	0.456	0.387	0.0033623	1	Emilin1
Cdk8	2.94903e-07	0.0664597	0.466	0.405	0.00338696	1	Cdk8
Fcgrt	2.95307e-07	-0.0270123	0.985	0.982	0.00339161	1	Fcgrt
Fam91a1	2.96329e-07	0.0566926	0.396	0.354	0.00340334	1	Fam91a1
Mbd2	2.9913e-07	0.0144704	0.807	0.807	0.00343551	1	Mbd2
Bcl7c	2.99449e-07	-0.200248	0.563	0.695	0.00343917	1	Bcl7c
Pnrc2	3.13776e-07	0.0489938	0.502	0.488	0.00360371	1	Pnrc2
Cdc14a	3.19452e-07	0.110685	0.273	0.18	0.0036689	1	Cdc14a
Nfkbib	3.21077e-07	0.102847	0.269	0.192	0.00368757	1	Nfkbib
Dhrs3	3.23672e-07	0.0822517	0.532	0.436	0.00371737	1	Dhrs3
Cbx6	3.3869e-07	0.0391992	0.695	0.664	0.00388985	1	Cbx6
Adamts2	3.39234e-07	0.0349382	0.931	0.912	0.0038961	1	Adamts2
F3	3.47419e-07	0.141763	0.629	0.498	0.00399011	1	F3
Flot2	3.49606e-07	0.0495179	0.475	0.448	0.00401523	1	Flot2
Smndc1	3.52976e-07	0.0558122	0.37	0.324	0.00405393	1	Smndc1
Zfp131	3.68289e-07	0.0627206	0.419	0.355	0.0042298	1	Zfp131
Dennd1b	3.73557e-07	0.0585685	0.395	0.363	0.00429031	1	Dennd1b
Enpp3	3.75372e-07	0.0716797	0.389	0.343	0.00431115	1	Enpp3
Mmd	3.91584e-07	0.104587	0.281	0.199	0.00449734	1	Mmd
Adhfe1	4.02196e-07	0.166279	0.264	0.115	0.00461922	1	Adhfe1
Smim20	4.13277e-07	-0.205684	0.126	0.31	0.00474648	1	Smim20
Ccng2	4.15507e-07	0.0500007	0.543	0.547	0.0047721	1	Ccng2
Cercam	4.18011e-07	-0.174486	0.266	0.43	0.00480086	1	Cercam
Gm26669	4.18427e-07	0.0687475	0.446	0.396	0.00480563	1	Gm26669
Fam69a	4.19134e-07	0.0666692	0.389	0.339	0.00481376	1	Fam69a
Pfn1	4.21435e-07	-0.238731	0.858	0.911	0.00484018	1	Pfn1
Ptprg	4.23163e-07	0.0575605	0.485	0.47	0.00486003	1	Ptprg
Dhx15	4.28227e-07	0.0419713	0.564	0.555	0.00491819	1	Dhx15
Sh3pxd2a	4.39299e-07	0.0821198	0.299	0.231	0.00504534	1	Sh3pxd2a
Atp5e	4.51819e-07	-0.220035	0.977	0.985	0.00518914	1	Atp5e
Man1a	4.60906e-07	-0.248853	0.971	0.971	0.00529351	1	Man1a
Srsf1	4.62147e-07	0.0495258	0.511	0.502	0.00530775	1	Srsf1
Fubp1	4.64236e-07	0.0527626	0.629	0.618	0.00533176	1	Fubp1
Sema6a	4.64383e-07	0.067634	0.407	0.325	0.00533344	1	Sema6a
Ctsh	4.65941e-07	0.0432349	0.917	0.841	0.00535134	1	Ctsh
Fam220a	4.66715e-07	0.0478364	0.471	0.459	0.00536022	1	Fam220a
Sdk1	5.00292e-07	-0.177391	0.269	0.419	0.00574585	1	Sdk1
Cmbl	5.00954e-07	0.108478	0.288	0.189	0.00575345	1	Cmbl
Naga	5.02347e-07	0.0456783	0.469	0.43	0.00576946	1	Naga
Mocs2	5.05289e-07	-0.172337	0.301	0.473	0.00580325	1	Mocs2
Tmem119	5.12771e-07	0.0791502	0.413	0.317	0.00588918	1	Tmem119
Tank	5.141e-07	0.0829573	0.285	0.22	0.00590444	1	Tank
Sdf4	5.15285e-07	0.0147817	0.828	0.807	0.00591805	1	Sdf4
Parp9	5.20458e-07	0.0916738	0.29	0.215	0.00597746	1	Parp9
Ltbr	5.35282e-07	0.0492287	0.409	0.373	0.00614771	1	Ltbr
Taok1	5.4567e-07	0.0252412	0.742	0.746	0.00626702	1	Taok1
Polg	5.45773e-07	0.0569129	0.358	0.31	0.0062682	1	Polg
Hnrnpll	5.46822e-07	0.0565155	0.418	0.379	0.00628025	1	Hnrnpll
Ldlr	5.52998e-07	0.139895	0.254	0.152	0.00635118	1	Ldlr
Foxc1	5.54075e-07	0.239509	0.21	0.082	0.00636356	1	Foxc1
Spry4	5.56263e-07	0.183058	0.252	0.104	0.00638868	1	Spry4
Pparg	5.59106e-07	0.121086	0.272	0.159	0.00642134	1	Pparg
Mapkapk2	5.61307e-07	0.0523235	0.412	0.368	0.00644661	1	Mapkapk2
Dtx3	5.88776e-07	0.0415882	0.529	0.522	0.00676209	1	Dtx3
Ramp2	6.05199e-07	-0.246354	0.808	0.872	0.00695071	1	Ramp2
Sult1a1	6.06632e-07	0.0483299	0.647	0.572	0.00696717	1	Sult1a1
Tpi1	6.11517e-07	-0.192839	0.484	0.618	0.00702327	1	Tpi1
St3gal2	6.23414e-07	-0.207092	0.551	0.663	0.00715991	1	St3gal2
Pde4b	6.28708e-07	0.309354	0.212	0.048	0.00722071	1	Pde4b
Sp140	6.56062e-07	-0.18213	0.244	0.373	0.00753487	1	Sp140
Ubxn1	6.70977e-07	-0.201877	0.634	0.759	0.00770617	1	Ubxn1
Lrrc17	6.8443e-07	-0.206193	0.443	0.586	0.00786068	1	Lrrc17
Ahctf1	6.90445e-07	0.0487177	0.456	0.418	0.00792977	1	Ahctf1
Tm2d2	7.12483e-07	0.0278656	0.693	0.7	0.00818287	1	Tm2d2
Pgls	7.12524e-07	-0.198191	0.51	0.652	0.00818334	1	Pgls
Cdc42ep1	7.1293e-07	0.1584	0.254	0.121	0.008188	1	Cdc42ep1
Spred2	7.26014e-07	0.0616682	0.33	0.289	0.00833827	1	Spred2
Fam171b	7.3701e-07	-0.180648	0.335	0.461	0.00846456	1	Fam171b
Siva1	7.43673e-07	0.0502531	0.416	0.344	0.00854109	1	Siva1
Efr3a	7.52456e-07	0.0351064	0.592	0.576	0.00864196	1	Efr3a
Xist	7.69006e-07	-0.0116825	0.999	0.998	0.00883203	1	Xist
Colgalt1	7.70751e-07	0.0404541	0.595	0.597	0.00885208	1	Colgalt1
Dnajb6	7.77643e-07	0.0175859	0.781	0.752	0.00893122	1	Dnajb6
Rabac1	7.85403e-07	-0.0275004	0.985	0.986	0.00902036	1	Rabac1
Eya2	7.87542e-07	0.0604515	0.365	0.323	0.00904492	1	Eya2
Cavin1	7.98557e-07	-0.265673	0.958	0.972	0.00917143	1	Cavin1
Ncl	8.01326e-07	-0.00487344	0.902	0.911	0.00920323	1	Ncl
Lyst	8.04535e-07	0.0518739	0.428	0.374	0.00924008	1	Lyst
Ywhab	8.09311e-07	-0.00636712	0.907	0.904	0.00929493	1	Ywhab
Tmem159	8.14315e-07	0.0304526	0.734	0.698	0.0093524	1	Tmem159
Psme1	8.21562e-07	-0.212438	0.551	0.691	0.00943564	1	Psme1
Rapgef6	8.44866e-07	0.0513187	0.46	0.445	0.00970328	1	Rapgef6
Dcun1d5	8.8811e-07	0.0342986	0.605	0.587	0.0101999	1	Dcun1d5
Panx1	9.18261e-07	0.152069	0.252	0.13	0.0105462	1	Panx1
Jak2	9.30634e-07	0.0676498	0.33	0.286	0.0106883	1	Jak2
Ythdf1	9.47954e-07	0.0472964	0.414	0.387	0.0108873	1	Ythdf1
Rhoq	9.67158e-07	0.0317287	0.734	0.732	0.0111078	1	Rhoq
Slc31a2	9.85569e-07	-0.178698	0.205	0.36	0.0113193	1	Slc31a2
Jam2	1.00465e-06	0.0686818	0.324	0.279	0.0115384	1	Jam2
Snrnp48	1.00581e-06	-0.169618	0.277	0.414	0.0115517	1	Snrnp48
S100a4	1.05129e-06	-0.317435	0.083	0.195	0.012074	1	S100a4
Dlst	1.05908e-06	0.047375	0.447	0.418	0.0121635	1	Dlst
Mob4	1.0888e-06	0.0373748	0.548	0.516	0.0125048	1	Mob4
Dazap1	1.11145e-06	0.040894	0.473	0.456	0.012765	1	Dazap1
Pcna	1.13179e-06	0.0578979	0.318	0.28	0.0129986	1	Pcna
Ldb2	1.13197e-06	0.0927703	0.291	0.207	0.0130006	1	Ldb2
Slc7a8	1.13308e-06	0.0824231	0.288	0.222	0.0130135	1	Slc7a8
Kcnq1ot1	1.16098e-06	-0.307319	0.68	0.732	0.0133339	1	Kcnq1ot1
Gltp	1.16785e-06	-0.169168	0.253	0.405	0.0134127	1	Gltp
Ulk1	1.1854e-06	0.0556152	0.356	0.299	0.0136143	1	Ulk1
Slc35b2	1.19684e-06	0.0533568	0.347	0.327	0.0137458	1	Slc35b2
Phc3	1.20183e-06	0.0445661	0.48	0.447	0.013803	1	Phc3
Rpl22	1.21834e-06	-0.204962	1	1	0.0139926	1	Rpl22
Tbc1d15	1.22331e-06	0.046076	0.424	0.4	0.0140497	1	Tbc1d15
Rps27a	1.24725e-06	-0.116758	1	1	0.0143246	1	Rps27a
Zfp516	1.24747e-06	0.0544486	0.386	0.356	0.0143272	1	Zfp516
Bud31	1.24985e-06	0.0455474	0.405	0.361	0.0143546	1	Bud31
Dhdh	1.26299e-06	0.0728877	0.309	0.24	0.0145054	1	Dhdh
Cnot1	1.27988e-06	0.0418734	0.487	0.45	0.0146994	1	Cnot1
Pdzd2	1.28719e-06	-0.177052	0.307	0.451	0.0147833	1	Pdzd2
Cdon	1.31014e-06	0.0404662	0.75	0.733	0.0150469	1	Cdon
Kmt2c	1.31394e-06	0.0298098	0.642	0.624	0.0150906	1	Kmt2c
Cavin2	1.34907e-06	0.081252	0.53	0.476	0.015494	1	Cavin2
Eny2	1.35346e-06	0.0335902	0.635	0.625	0.0155445	1	Eny2
Ilk	1.36844e-06	0.0211595	0.676	0.664	0.0157166	1	Ilk
Ankrd44	1.37883e-06	0.0578083	0.44	0.393	0.0158358	1	Ankrd44
Rbm7	1.39704e-06	0.0310986	0.573	0.585	0.016045	1	Rbm7
Nr4a3	1.42141e-06	0.246902	0.189	0.12	0.0163249	1	Nr4a3
Crtc2	1.43075e-06	0.0713068	0.288	0.235	0.0164321	1	Crtc2
Atn1	1.486e-06	0.0413918	0.498	0.432	0.0170667	1	Atn1
Reep5	1.49548e-06	-0.213138	0.693	0.798	0.0171756	1	Reep5
Hs2st1	1.55454e-06	0.0443405	0.431	0.39	0.0178539	1	Hs2st1
Mon2	1.5585e-06	0.0450496	0.476	0.449	0.0178994	1	Mon2
Pi4k2b	1.56979e-06	0.0565932	0.377	0.34	0.018029	1	Pi4k2b
Plac9b	1.5863e-06	-0.168116	0.36	0.481	0.0182187	1	Plac9b
G3bp1	1.59065e-06	0.0304173	0.614	0.603	0.0182686	1	G3bp1
Rnh1	1.60317e-06	-0.207932	0.628	0.741	0.0184125	1	Rnh1
Dynlrb1	1.62744e-06	-0.20879	0.731	0.812	0.0186911	1	Dynlrb1
Arid1b	1.65785e-06	0.0416484	0.469	0.443	0.0190404	1	Arid1b
Rnf19a	1.65808e-06	0.0504181	0.471	0.412	0.019043	1	Rnf19a
Tanc1	1.68865e-06	0.0813247	0.278	0.211	0.0193942	1	Tanc1
Mlxip	1.69268e-06	0.0627173	0.31	0.258	0.0194404	1	Mlxip
Tnrc6c	1.7343e-06	0.0312485	0.729	0.719	0.0199184	1	Tnrc6c
Pgm2	1.73852e-06	0.0567976	0.334	0.305	0.0199669	1	Pgm2
Ppp2r5c	1.74992e-06	0.0305751	0.612	0.594	0.0200978	1	Ppp2r5c
Slc40a1	1.7533e-06	0.100071	0.269	0.189	0.0201367	1	Slc40a1
5031425E22Rik	1.80132e-06	0.0537635	0.337	0.306	0.0206881	1	5031425E22Rik
H3f3a	1.80498e-06	-0.0575067	0.999	0.998	0.0207302	1	H3f3a
Dock9	1.81659e-06	0.0657279	0.307	0.264	0.0208636	1	Dock9
Gsk3b	1.82534e-06	0.0108506	0.817	0.798	0.0209641	1	Gsk3b
Msrb3	1.853e-06	0.0554021	0.337	0.291	0.0212817	1	Msrb3
Efs	1.89082e-06	-0.170348	0.23	0.392	0.0217161	1	Efs
Rpl7a	1.96071e-06	-0.210218	1	1	0.0225187	1	Rpl7a
Pdia6	1.99018e-06	-0.216914	0.654	0.757	0.0228572	1	Pdia6
Kctd9	1.99691e-06	-0.196916	0.14	0.308	0.0229345	1	Kctd9
Mprip	1.99927e-06	0.0234988	0.746	0.747	0.0229616	1	Mprip
Pum1	2.02227e-06	0.0295627	0.677	0.659	0.0232258	1	Pum1
Cc2d2a	2.05305e-06	0.0438444	0.476	0.468	0.0235793	1	Cc2d2a
Traf3ip2	2.12408e-06	0.110367	0.264	0.16	0.024395	1	Traf3ip2
Cdc73	2.16456e-06	0.0462004	0.449	0.415	0.02486	1	Cdc73
Ifnar1	2.17072e-06	0.0458534	0.389	0.362	0.0249307	1	Ifnar1
Rps23	2.22802e-06	-0.118966	1	1	0.0255888	1	Rps23
Pink1	2.24295e-06	0.0170517	0.708	0.699	0.0257603	1	Pink1
Rcan2	2.28024e-06	-0.188093	0.174	0.335	0.0261885	1	Rcan2
Nop14	2.2837e-06	0.0595705	0.323	0.283	0.0262283	1	Nop14
Nfix	2.28889e-06	-0.0445396	0.991	0.997	0.0262879	1	Nfix
Akt2	2.30147e-06	0.0370776	0.521	0.486	0.0264324	1	Akt2
Myo5a	2.3127e-06	0.0694548	0.307	0.249	0.0265613	1	Myo5a
Aspa	2.35138e-06	0.0881331	0.274	0.206	0.0270056	1	Aspa
A4galt	2.43986e-06	0.0774398	0.278	0.216	0.0280218	1	A4galt
Tshz2	2.44426e-06	-0.0176348	0.966	0.964	0.0280723	1	Tshz2
Sec24a	2.5084e-06	0.0537008	0.353	0.327	0.028809	1	Sec24a
Smchd1	2.53047e-06	0.0425336	0.52	0.49	0.0290625	1	Smchd1
Anp32b	2.62672e-06	-0.205317	0.609	0.735	0.0301679	1	Anp32b
Mapk1ip1l	2.67754e-06	0.0338322	0.545	0.512	0.0307516	1	Mapk1ip1l
Ybx1	2.70188e-06	-0.218037	0.968	0.985	0.0310311	1	Ybx1
Anxa7	2.71041e-06	0.00675125	0.766	0.761	0.0311291	1	Anxa7
Irf9	2.74316e-06	0.0631407	0.319	0.276	0.0315052	1	Irf9
Dst	2.74901e-06	0.00647453	0.902	0.894	0.0315724	1	Dst
Emd	2.75446e-06	0.0440044	0.437	0.409	0.031635	1	Emd
Mrps16	2.81418e-06	-0.166415	0.379	0.526	0.0323208	1	Mrps16
Srrt	2.83128e-06	0.0558349	0.347	0.29	0.0325173	1	Srrt
Scp2	2.9674e-06	0.0151917	0.756	0.731	0.0340806	1	Scp2
Trip12	3.01404e-06	0.0187477	0.732	0.719	0.0346163	1	Trip12
Des	3.04085e-06	0.173731	0.192	0.129	0.0349241	1	Des
Sypl	3.05233e-06	0.0257715	0.681	0.673	0.035056	1	Sypl
Srgn	3.05759e-06	-0.195759	0.201	0.333	0.0351165	1	Srgn
Eid1	3.11791e-06	-0.211262	0.68	0.783	0.0358092	1	Eid1
2020-03-06	3.12068e-06	0.0412735	0.403	0.386	0.035841	1	2020-03-06
Ccdc90b	3.13475e-06	-0.168584	0.243	0.385	0.0360026	1	Ccdc90b
Elavl1	3.15802e-06	0.0342186	0.501	0.486	0.0362699	1	Elavl1
Ccl8	3.16591e-06	0.158579	0.207	0.166	0.0363605	1	Ccl8
Esyt2	3.18451e-06	0.0259693	0.704	0.65	0.0365741	1	Esyt2
Kcmf1	3.25189e-06	0.0281998	0.557	0.57	0.0373479	1	Kcmf1
Pank2	3.25887e-06	0.0487978	0.347	0.304	0.0374281	1	Pank2
Zfp954	3.27838e-06	0.114247	0.253	0.157	0.0376521	1	Zfp954
Napa	3.28042e-06	0.0316321	0.535	0.522	0.0376756	1	Napa
Map3k5	3.30667e-06	0.110567	0.249	0.161	0.0379771	1	Map3k5
Iws1	3.35618e-06	0.049023	0.394	0.363	0.0385457	1	Iws1
Hypk	3.35716e-06	-0.165667	0.396	0.524	0.0385569	1	Hypk
Hibadh	3.39157e-06	0.0289284	0.581	0.57	0.0389522	1	Hibadh
Nasp	3.42297e-06	0.0590281	0.327	0.296	0.0393128	1	Nasp
Braf	3.48949e-06	0.0470885	0.443	0.407	0.0400768	1	Braf
Arl6ip5	3.51379e-06	-0.200251	0.689	0.787	0.0403559	1	Arl6ip5
Tnpo1	3.53197e-06	0.0274705	0.616	0.597	0.0405647	1	Tnpo1
Ipo7	3.5367e-06	0.0503761	0.372	0.336	0.040619	1	Ipo7
Lpgat1	3.55174e-06	-0.183382	0.417	0.57	0.0407917	1	Lpgat1
Ptgir	3.55841e-06	0.110924	0.286	0.157	0.0408683	1	Ptgir
Sidt2	3.6776e-06	0.0263008	0.614	0.606	0.0422372	1	Sidt2
Slc25a51	3.68286e-06	0.0396683	0.447	0.433	0.0422977	1	Slc25a51
Rnf213	3.73236e-06	0.065827	0.332	0.299	0.0428661	1	Rnf213
Arhgap18	3.80501e-06	0.0504422	0.375	0.336	0.0437005	1	Arhgap18
Hsd17b11	3.82174e-06	0.0206141	0.681	0.665	0.0438927	1	Hsd17b11
Pdia3	3.8649e-06	-0.226217	0.878	0.931	0.0443883	1	Pdia3
Camk1	3.89593e-06	-0.180514	0.455	0.592	0.0447448	1	Camk1
Actb	3.93773e-06	-0.0528344	1	1	0.0452249	1	Actb
Ttpal	4.04509e-06	0.119584	0.252	0.147	0.0464579	1	Ttpal
Rnf167	4.05438e-06	0.0423687	0.395	0.364	0.0465645	1	Rnf167
Slc9a3r2	4.08553e-06	0.0591631	0.499	0.415	0.0469223	1	Slc9a3r2
Chp1	4.21109e-06	-0.195941	0.55	0.638	0.0483644	1	Chp1
Tmem135	4.2465e-06	0.0569267	0.315	0.254	0.0487711	1	Tmem135
Serping1	4.30329e-06	-0.0544939	1	1	0.0494232	1	Serping1
Zbtb38	4.30438e-06	0.0509096	0.517	0.475	0.0494358	1	Zbtb38
Bcl9l	4.35361e-06	0.0394317	0.549	0.513	0.0500012	1	Bcl9l
Kmt2a	4.37018e-06	0.0231119	0.703	0.69	0.0501915	1	Kmt2a
Usp7	4.45536e-06	0.0358549	0.543	0.541	0.0511698	1	Usp7
Taok3	4.45567e-06	0.0329913	0.565	0.536	0.0511734	1	Taok3
Gna13	4.46457e-06	0.0374868	0.51	0.496	0.0512756	1	Gna13
Mecp2	4.47744e-06	0.0365825	0.49	0.478	0.0514234	1	Mecp2
Maged1	4.55944e-06	0.0216748	0.706	0.678	0.0523651	1	Maged1
Akap13	4.56698e-06	-0.000768539	0.944	0.924	0.0524517	1	Akap13
Cyb5b	4.57969e-06	0.0513615	0.333	0.278	0.0525977	1	Cyb5b
Furin	4.6276e-06	0.0383691	0.447	0.411	0.053148	1	Furin
Rev3l	4.73426e-06	0.0483405	0.424	0.393	0.0543729	1	Rev3l
Chd2	4.8062e-06	0.0540252	0.518	0.48	0.0551992	1	Chd2
Snrpa	4.85017e-06	0.0498784	0.318	0.299	0.0557042	1	Snrpa
Rab1a	5.03157e-06	0.00548088	0.779	0.779	0.0577876	1	Rab1a
Esyt1	5.116e-06	0.0441766	0.441	0.424	0.0587573	1	Esyt1
Irf2bp2	5.13373e-06	0.0286078	0.747	0.762	0.0589609	1	Irf2bp2
Slc24a3	5.19832e-06	0.119963	0.254	0.146	0.0597027	1	Slc24a3
Kremen1	5.2545e-06	0.0386061	0.466	0.432	0.0603479	1	Kremen1
Slc36a4	5.30136e-06	0.0537432	0.319	0.282	0.0608861	1	Slc36a4
3632451O06Rik	5.31629e-06	0.0979153	0.268	0.189	0.0610576	1	3632451O06Rik
H2-T23	5.32515e-06	0.0124527	0.848	0.85	0.0611594	1	H2-T23
Fip1l1	5.33811e-06	0.0294986	0.593	0.576	0.0613081	1	Fip1l1
Adamts16	5.40665e-06	-0.31257	0.008	0.199	0.0620953	1	Adamts16
Pold4	5.54298e-06	-0.170762	0.421	0.564	0.0636611	1	Pold4
Tor1aip1	5.59244e-06	0.00656806	0.76	0.768	0.0642292	1	Tor1aip1
Pdgfd	5.62264e-06	-0.175058	0.202	0.341	0.064576	1	Pdgfd
Cdh11	5.65477e-06	0.0909838	0.417	0.332	0.0649451	1	Cdh11
Pld1	5.7112e-06	0.0560617	0.335	0.275	0.0655932	1	Pld1
Flt3l	5.78425e-06	0.0526287	0.355	0.311	0.0664321	1	Flt3l
Ttc28	6.04703e-06	0.00828057	0.795	0.77	0.0694501	1	Ttc28
Trp53inp2	6.11188e-06	0.111728	0.248	0.156	0.0701949	1	Trp53inp2
Oaf	6.13152e-06	-0.267925	0.667	0.791	0.0704205	1	Oaf
Pnpla8	6.17922e-06	0.0258448	0.668	0.643	0.0709684	1	Pnpla8
Atp6ap1	6.2533e-06	0.0184153	0.679	0.664	0.0718192	1	Atp6ap1
Rasl11a	6.28621e-06	0.176053	0.202	0.126	0.0721971	1	Rasl11a
Prkcsh	6.40961e-06	0.0339153	0.489	0.47	0.0736143	1	Prkcsh
Mib1	6.59699e-06	0.0310493	0.527	0.51	0.0757664	1	Mib1
Kpna4	6.6207e-06	0.0245804	0.619	0.62	0.0760388	1	Kpna4
Tgfbr3	6.66871e-06	-0.0143647	0.976	0.956	0.0765902	1	Tgfbr3
Tom1l2	6.71747e-06	0.0560054	0.296	0.257	0.0771501	1	Tom1l2
Eif3i	6.94976e-06	-0.192142	0.657	0.782	0.0798179	1	Eif3i
Cd44	6.95184e-06	0.0853784	0.394	0.287	0.0798419	1	Cd44
Tcf25	6.96713e-06	-0.00949525	0.849	0.865	0.0800174	1	Tcf25
H1fx	7.03486e-06	0.0855684	0.302	0.233	0.0807954	1	H1fx
Txndc17	7.04007e-06	-0.206433	0.835	0.9	0.0808552	1	Txndc17
Clcn3	7.18658e-06	0.0492851	0.344	0.341	0.0825378	1	Clcn3
Ssbp2	7.23298e-06	0.0343439	0.549	0.532	0.0830708	1	Ssbp2
Ube3a	7.27734e-06	0.0175281	0.71	0.724	0.0835803	1	Ube3a
Il15ra	7.73373e-06	0.0573109	0.315	0.292	0.0888218	1	Il15ra
Eva1b	7.74146e-06	0.0325218	0.634	0.585	0.0889107	1	Eva1b
Fbxo33	7.8346e-06	0.0776413	0.299	0.261	0.0899804	1	Fbxo33
Igf1r	7.98154e-06	0.0295681	0.693	0.659	0.091668	1	Igf1r
Pi15	8.03554e-06	-0.184567	0.194	0.344	0.0922881	1	Pi15
Rbpms	8.15694e-06	0.0242	0.915	0.857	0.0936825	1	Rbpms
Jun	8.29006e-06	0.0954181	0.997	0.986	0.0952113	1	Jun
Tle3	8.29103e-06	0.0398435	0.525	0.486	0.0952225	1	Tle3
G3bp2	8.31682e-06	0.0282823	0.605	0.599	0.0955187	1	G3bp2
Cblb	8.59868e-06	0.0305443	0.544	0.544	0.0987559	1	Cblb
Cpne8	8.77777e-06	-0.191747	0.463	0.592	0.100813	1	Cpne8
Spats2	8.79302e-06	0.0615202	0.286	0.248	0.100988	1	Spats2
Ccdc85b	8.88469e-06	0.0357018	0.478	0.473	0.102041	1	Ccdc85b
Wdr37	8.94769e-06	0.0544003	0.306	0.267	0.102764	1	Wdr37
Nr2f1	9.04635e-06	0.0642956	0.315	0.28	0.103897	1	Nr2f1
Sord	9.20222e-06	0.0398792	0.48	0.421	0.105687	1	Sord
Eef2	9.22745e-06	-0.0814119	0.996	1	0.105977	1	Eef2
Ctdsp1	9.37977e-06	0.0282588	0.567	0.535	0.107727	1	Ctdsp1
Ubald2	9.48307e-06	0.0307299	0.531	0.5	0.108913	1	Ubald2
Neo1	9.53089e-06	-0.163957	0.309	0.439	0.109462	1	Neo1
Epb41l1	9.55124e-06	0.0610173	0.278	0.241	0.109696	1	Epb41l1
Knop1	9.60914e-06	-0.166366	0.254	0.377	0.110361	1	Knop1
Znrf2	9.61529e-06	0.0612626	0.3	0.231	0.110432	1	Znrf2
Adgrg2	9.62472e-06	-0.254635	0.041	0.233	0.11054	1	Adgrg2
Snrnp200	9.66721e-06	0.0364545	0.389	0.38	0.111028	1	Snrnp200
Ube2f	9.67456e-06	0.0490348	0.307	0.286	0.111112	1	Ube2f
Fermt2	9.73966e-06	-0.00543763	0.851	0.848	0.11186	1	Fermt2
Cyp39a1	9.76123e-06	0.0840093	0.269	0.184	0.112108	1	Cyp39a1
Dock4	9.81692e-06	-0.168468	0.316	0.434	0.112747	1	Dock4
Adipor2	9.83802e-06	0.0473829	0.333	0.284	0.11299	1	Adipor2
Tspo	9.85733e-06	-0.224183	0.903	0.907	0.113211	1	Tspo
Ablim1	9.92382e-06	-0.233521	0.919	0.946	0.113975	1	Ablim1
Rab7b	9.94735e-06	-0.163783	0.327	0.463	0.114245	1	Rab7b
Apoe	1.03106e-05	0.310312	0.849	0.613	0.118417	1	Apoe
Rrbp1	1.03284e-05	-0.0110109	0.981	0.967	0.118621	1	Rrbp1
Pgm3	1.04438e-05	-0.171344	0.199	0.346	0.119947	1	Pgm3
Adk	1.04456e-05	0.0135786	0.741	0.711	0.119968	1	Adk
Zfp217	1.05111e-05	0.0601836	0.299	0.249	0.12072	1	Zfp217
Nolc1	1.06125e-05	0.0645854	0.285	0.239	0.121885	1	Nolc1
Cnppd1	1.07014e-05	0.0350383	0.428	0.4	0.122906	1	Cnppd1
Oasl2	1.07145e-05	0.0795825	0.283	0.234	0.123056	1	Oasl2
Opa3	1.07447e-05	0.0825884	0.259	0.203	0.123402	1	Opa3
Fmo2	1.09704e-05	0.217526	0.381	0.277	0.125995	1	Fmo2
Twsg1	1.11611e-05	0.00792508	0.797	0.774	0.128185	1	Twsg1
Acvrl1	1.14751e-05	0.024369	0.616	0.593	0.131792	1	Acvrl1
Ncoa7	1.15692e-05	0.0312296	0.527	0.525	0.132872	1	Ncoa7
Dennd5b	1.16173e-05	0.0389328	0.516	0.484	0.133425	1	Dennd5b
Baz2b	1.16216e-05	0.0288772	0.64	0.609	0.133474	1	Baz2b
Gadd45g	1.1637e-05	0.226983	0.426	0.395	0.133651	1	Gadd45g
Rnf10	1.1681e-05	0.0118873	0.684	0.691	0.134156	1	Rnf10
Actr1b	1.20321e-05	0.0404624	0.349	0.329	0.138189	1	Actr1b
Mul1	1.20887e-05	0.104301	0.252	0.155	0.138838	1	Mul1
Bst2	1.23387e-05	-0.244539	0.598	0.69	0.14171	1	Bst2
Fer	1.23884e-05	-0.177054	0.174	0.321	0.14228	1	Fer
Ulk2	1.26235e-05	0.0343742	0.447	0.43	0.144981	1	Ulk2
Agpat4	1.2826e-05	-0.181312	0.393	0.508	0.147306	1	Agpat4
Ndn	1.29678e-05	-0.192983	0.55	0.674	0.148935	1	Ndn
Ace	1.30875e-05	-0.242998	0.628	0.737	0.150309	1	Ace
Fbxo11	1.30968e-05	0.0353713	0.471	0.439	0.150417	1	Fbxo11
Ccdc82	1.31627e-05	0.052844	0.321	0.267	0.151174	1	Ccdc82
Mrpl14	1.32264e-05	-0.156821	0.39	0.528	0.151905	1	Mrpl14
Nup153	1.35326e-05	0.0472153	0.323	0.293	0.155422	1	Nup153
Mtch1	1.35603e-05	-0.211618	0.861	0.921	0.15574	1	Mtch1
Atxn7	1.36401e-05	0.0405477	0.403	0.39	0.156657	1	Atxn7
Birc6	1.3761e-05	0.0259757	0.634	0.614	0.158045	1	Birc6
Bmp6	1.37732e-05	-0.252757	0.044	0.23	0.158186	1	Bmp6
Rsf1	1.39345e-05	0.0353127	0.476	0.465	0.160037	1	Rsf1
Ip6k1	1.40636e-05	0.0288209	0.503	0.486	0.161521	1	Ip6k1
Rlf	1.41253e-05	0.041748	0.38	0.343	0.162229	1	Rlf
Cep120	1.45277e-05	0.0572073	0.281	0.238	0.16685	1	Cep120
Olfr1033	1.47067e-05	0.0956747	0.241	0.208	0.168906	1	Olfr1033
Psmb1	1.47919e-05	-0.200035	0.863	0.906	0.169885	1	Psmb1
Prpsap1	1.50267e-05	0.0365413	0.388	0.37	0.172581	1	Prpsap1
Gclc	1.51542e-05	0.0992424	0.262	0.211	0.174046	1	Gclc
Rab21	1.51846e-05	0.0137666	0.658	0.647	0.174395	1	Rab21
Psma5	1.58121e-05	-0.179733	0.586	0.714	0.181602	1	Psma5
Magoh	1.59134e-05	0.0227832	0.536	0.525	0.182765	1	Magoh
Ccdc71l	1.61787e-05	0.0485358	0.333	0.348	0.185812	1	Ccdc71l
Phf11d	1.62351e-05	0.061155	0.31	0.269	0.18646	1	Phf11d
Fam208b	1.63286e-05	0.0449844	0.327	0.309	0.187534	1	Fam208b
Glmp	1.65074e-05	0.0194374	0.588	0.594	0.189587	1	Glmp
Micu1	1.66944e-05	-0.154565	0.332	0.461	0.191735	1	Micu1
Aprt	1.68202e-05	0.0196919	0.634	0.633	0.19318	1	Aprt
Col16a1	1.68315e-05	-0.16072	0.276	0.402	0.19331	1	Col16a1
Rbfox2	1.68442e-05	0.0248493	0.567	0.572	0.193456	1	Rbfox2
Fem1b	1.68955e-05	0.0522845	0.3	0.274	0.194045	1	Fem1b
Arap1	1.69412e-05	-0.159404	0.305	0.444	0.19457	1	Arap1
Gda	1.71162e-05	-0.201562	0.504	0.623	0.19658	1	Gda
Cdkn2d	1.72469e-05	0.0544052	0.301	0.267	0.198081	1	Cdkn2d
Ptpn1	1.74894e-05	0.0379281	0.402	0.373	0.200865	1	Ptpn1
Cog7	1.76109e-05	0.048449	0.315	0.297	0.202261	1	Cog7
Ric1	1.76498e-05	0.0436426	0.334	0.301	0.202707	1	Ric1
Airn	1.78027e-05	0.0428127	0.409	0.38	0.204464	1	Airn
Plxnd1	1.79229e-05	0.0975791	0.257	0.162	0.205844	1	Plxnd1
Hmgb1	1.80016e-05	-0.0460966	0.989	0.998	0.206748	1	Hmgb1
Sobp	1.83281e-05	0.042279	0.377	0.353	0.210498	1	Sobp
AW549877	1.83671e-05	0.0298751	0.492	0.476	0.210947	1	AW549877
Eml1	1.84582e-05	0.0514432	0.309	0.259	0.211993	1	Eml1
Nucb2	1.85449e-05	-0.165788	0.37	0.505	0.212988	1	Nucb2
Clip1	1.86919e-05	-0.200742	0.548	0.654	0.214677	1	Clip1
Fam168b	1.87414e-05	0.0294185	0.479	0.456	0.215245	1	Fam168b
Zfp330	1.88935e-05	0.0415096	0.321	0.307	0.216992	1	Zfp330
Slc25a24	1.92254e-05	-0.159546	0.328	0.456	0.220804	1	Slc25a24
Isg15	1.94541e-05	0.142016	0.222	0.145	0.223431	1	Isg15
Fxyd1	1.95484e-05	-0.042806	0.97	0.981	0.224514	1	Fxyd1
Mrpl23	1.97096e-05	-0.182666	0.557	0.68	0.226364	1	Mrpl23
Tpp1	1.9792e-05	0.0287313	0.559	0.514	0.227311	1	Tpp1
Dmwd	1.99577e-05	0.0450743	0.319	0.272	0.229214	1	Dmwd
Taf15	1.99743e-05	0.0402355	0.368	0.336	0.229405	1	Taf15
Kif5b	2.00273e-05	0.00292072	0.821	0.801	0.230014	1	Kif5b
Glod4	2.02604e-05	-0.155284	0.236	0.384	0.232691	1	Glod4
Bin1	2.03755e-05	-0.153864	0.349	0.484	0.234013	1	Bin1
Pon2	2.05025e-05	0.0213095	0.626	0.594	0.235471	1	Pon2
Sirt1	2.06407e-05	0.0612954	0.291	0.235	0.237059	1	Sirt1
mt-Atp6	2.09099e-05	-0.0884274	1	1	0.24015	1	mt-Atp6
Gigyf1	2.11736e-05	0.0291444	0.527	0.521	0.243179	1	Gigyf1
Paf1	2.1216e-05	0.0482067	0.313	0.271	0.243665	1	Paf1
Rras	2.1413e-05	-0.196806	0.634	0.756	0.245928	1	Rras
Mbd3	2.15756e-05	-0.15085	0.288	0.436	0.247796	1	Mbd3
Khdrbs3	2.16229e-05	0.0596462	0.306	0.251	0.248339	1	Khdrbs3
Jag1	2.1919e-05	-0.182394	0.235	0.33	0.251739	1	Jag1
Psmb8	2.23839e-05	-0.189148	0.445	0.588	0.257079	1	Psmb8
Anxa4	2.25191e-05	-0.165387	0.427	0.573	0.258632	1	Anxa4
Rps24	2.26591e-05	-0.190484	1	1	0.26024	1	Rps24
Fto	2.28136e-05	0.0293563	0.492	0.486	0.262014	1	Fto
Rps5	2.28479e-05	-0.192428	1	1	0.262408	1	Rps5
Arhgap10	2.2919e-05	0.0276558	0.601	0.576	0.263225	1	Arhgap10
Actg1	2.2969e-05	-0.0270233	0.987	0.989	0.263799	1	Actg1
Loxl2	2.30196e-05	0.0128023	0.844	0.827	0.26438	1	Loxl2
Polr2e	2.31325e-05	-0.161591	0.463	0.589	0.265677	1	Polr2e
Washc4	2.33159e-05	0.0324804	0.452	0.441	0.267784	1	Washc4
4931406P16Rik	2.34724e-05	0.0413638	0.374	0.353	0.269581	1	4931406P16Rik
Nox4	2.3748e-05	-0.174387	0.262	0.357	0.272746	1	Nox4
Srf	2.40545e-05	0.0731821	0.258	0.202	0.276266	1	Srf
Fam126a	2.41718e-05	-0.167782	0.198	0.34	0.277614	1	Fam126a
Eef1a1	2.45098e-05	-0.198828	1	1	0.281495	1	Eef1a1
Hnrnpa0	2.4996e-05	-0.0388835	0.956	0.968	0.28708	1	Hnrnpa0
Pbrm1	2.54024e-05	-0.00824044	0.835	0.845	0.291747	1	Pbrm1
Pitpnc1	2.56139e-05	0.0495009	0.348	0.304	0.294175	1	Pitpnc1
Pnpla7	2.572e-05	0.079806	0.259	0.189	0.295394	1	Pnpla7
Tacc1	2.59626e-05	0.00437433	0.783	0.774	0.298181	1	Tacc1
Camsap2	2.61083e-05	0.0454651	0.314	0.272	0.299854	1	Camsap2
Ep300	2.64256e-05	0.024146	0.506	0.51	0.303498	1	Ep300
Mfge8	2.68106e-05	-0.0163927	0.887	0.896	0.30792	1	Mfge8
Eif4g3	2.71771e-05	0.0119841	0.719	0.725	0.312128	1	Eif4g3
Grasp	2.73114e-05	0.0361606	0.438	0.433	0.313671	1	Grasp
Mgp	2.74111e-05	0.354597	0.808	0.521	0.314817	1	Mgp
Tomm20	2.74652e-05	-0.0149424	0.861	0.848	0.315438	1	Tomm20
Aox1	2.75686e-05	0.0415003	0.428	0.387	0.316625	1	Aox1
Lims1	2.75851e-05	0.0216402	0.571	0.552	0.316815	1	Lims1
Syde2	2.78608e-05	0.0592873	0.291	0.256	0.319981	1	Syde2
Fbxl3	2.79198e-05	0.0219886	0.582	0.559	0.320659	1	Fbxl3
Rps27	2.81553e-05	-0.114291	1	1	0.323364	1	Rps27
Gtf2b	2.84748e-05	0.0304746	0.403	0.412	0.327033	1	Gtf2b
Hnrnpm	2.86059e-05	0.0163894	0.616	0.614	0.328539	1	Hnrnpm
Fbxo30	2.8685e-05	0.0562349	0.351	0.327	0.329447	1	Fbxo30
Arl8b	2.93273e-05	0.0246868	0.494	0.493	0.336823	1	Arl8b
Itga1	2.95552e-05	0.0982215	0.25	0.164	0.339442	1	Itga1
Maml3	2.98566e-05	0.0486168	0.341	0.286	0.342903	1	Maml3
Diaph2	3.02057e-05	0.0318825	0.501	0.515	0.346913	1	Diaph2
Tmem9b	3.08602e-05	0.0335516	0.363	0.35	0.354429	1	Tmem9b
Gclm	3.09627e-05	0.0391304	0.361	0.347	0.355606	1	Gclm
Hdac5	3.12723e-05	0.037852	0.346	0.307	0.359162	1	Hdac5
Cpd	3.15899e-05	0.0087035	0.733	0.722	0.36281	1	Cpd
Adamtsl5	3.16515e-05	-0.171559	0.173	0.321	0.363518	1	Adamtsl5
Ccnd3	3.20043e-05	-0.156799	0.307	0.422	0.367569	1	Ccnd3
Spry2	3.20624e-05	0.0121741	0.778	0.725	0.368236	1	Spry2
Tor1aip2	3.22146e-05	0.0326155	0.427	0.415	0.369985	1	Tor1aip2
Kdm7a	3.22673e-05	0.0428004	0.576	0.538	0.37059	1	Kdm7a
Bet1l	3.23934e-05	-0.16272	0.189	0.346	0.372038	1	Bet1l
Acox1	3.2878e-05	0.0395754	0.33	0.32	0.377604	1	Acox1
Psme2	3.3061e-05	-0.159438	0.393	0.536	0.379705	1	Psme2
Stk38	3.31244e-05	-0.18208	0.513	0.649	0.380434	1	Stk38
Pappa	3.31434e-05	0.155103	0.233	0.1	0.380652	1	Pappa
Nxf1	3.3372e-05	0.0159949	0.624	0.603	0.383277	1	Nxf1
Tardbp	3.35024e-05	0.0313905	0.522	0.51	0.384775	1	Tardbp
Pip5k1a	3.35262e-05	0.0314272	0.456	0.444	0.385049	1	Pip5k1a
Agpat3	3.35724e-05	0.0260002	0.508	0.488	0.385579	1	Agpat3
Tcaf1	3.38376e-05	0.0259033	0.541	0.524	0.388625	1	Tcaf1
Arl6ip1	3.39433e-05	-0.00466142	0.788	0.811	0.389839	1	Arl6ip1
Psmd11	3.47183e-05	0.014007	0.658	0.645	0.398739	1	Psmd11
Foxn2	3.47954e-05	0.0471333	0.309	0.272	0.399626	1	Foxn2
Kmt2d	3.48631e-05	0.0338253	0.39	0.367	0.400402	1	Kmt2d
Spsb1	3.58552e-05	-0.188566	0.32	0.432	0.411797	1	Spsb1
Pik3ca	3.60409e-05	0.0283713	0.499	0.515	0.41393	1	Pik3ca
Ppt1	3.61246e-05	0.0239495	0.516	0.497	0.414891	1	Ppt1
Arl8a	3.72363e-05	0.0209599	0.525	0.529	0.427659	1	Arl8a
Rai1	3.75072e-05	0.0519172	0.286	0.236	0.43077	1	Rai1
Ier3	3.76781e-05	0.103327	0.673	0.514	0.432732	1	Ier3
Ralgapa1	3.8079e-05	0.0330993	0.389	0.368	0.437337	1	Ralgapa1
Foxn3	3.81407e-05	0.00741435	0.765	0.751	0.438045	1	Foxn3
Tpst2	3.98719e-05	-0.152333	0.241	0.377	0.457929	1	Tpst2
Ncoa3	3.99826e-05	0.030026	0.433	0.416	0.4592	1	Ncoa3
Dync1h1	4.00265e-05	0.00125099	0.773	0.778	0.459704	1	Dync1h1
Wasl	4.03339e-05	0.00891865	0.659	0.648	0.463235	1	Wasl
Mapk14	4.11069e-05	0.0308151	0.386	0.368	0.472112	1	Mapk14
Myh10	4.12575e-05	-0.168088	0.196	0.331	0.473842	1	Myh10
Ppp6r3	4.13217e-05	0.0290619	0.488	0.467	0.47458	1	Ppp6r3
Hexb	4.17122e-05	0.00528403	0.747	0.724	0.479064	1	Hexb
Eif4enif1	4.27063e-05	0.0388201	0.321	0.288	0.490482	1	Eif4enif1
Acat1	4.28073e-05	0.00557482	0.695	0.691	0.491642	1	Acat1
C1qtnf1	4.32313e-05	-0.173928	0.459	0.57	0.496512	1	C1qtnf1
Gxylt1	4.34728e-05	0.0429511	0.333	0.293	0.499285	1	Gxylt1
Tor3a	4.35967e-05	0.0441151	0.292	0.279	0.500708	1	Tor3a
Clasp2	4.41101e-05	0.0331912	0.404	0.386	0.506604	1	Clasp2
Ube2d2a	4.43084e-05	0.00541561	0.673	0.693	0.508882	1	Ube2d2a
Kitl	4.43953e-05	0.065402	0.272	0.262	0.50988	1	Kitl
Arglu1	4.44818e-05	-0.204644	0.729	0.805	0.510873	1	Arglu1
Gripap1	4.51038e-05	0.048332	0.291	0.245	0.518017	1	Gripap1
Hint1	4.5668e-05	-0.0503852	0.987	0.983	0.524497	1	Hint1
Ube2s	4.6507e-05	-0.00428594	0.756	0.772	0.534132	1	Ube2s
Uqcc3	4.69228e-05	-0.148372	0.368	0.504	0.538909	1	Uqcc3
Fbrsl1	4.70466e-05	0.0528631	0.28	0.235	0.54033	1	Fbrsl1
Dact3	4.85283e-05	0.0767674	0.254	0.184	0.557347	1	Dact3
Srpx	4.8674e-05	0.0453388	0.508	0.483	0.559021	1	Srpx
Tgfb1i1	4.86848e-05	-0.151484	0.272	0.417	0.559145	1	Tgfb1i1
Erc1	4.93349e-05	0.0587009	0.255	0.233	0.566612	1	Erc1
Cald1	4.93903e-05	-0.0393998	0.981	0.974	0.567247	1	Cald1
Rhoc	4.97822e-05	-0.224541	0.804	0.863	0.571749	1	Rhoc
Nf1	4.98456e-05	0.0256423	0.464	0.434	0.572477	1	Nf1
Paxx	4.98894e-05	-0.159462	0.192	0.343	0.57298	1	Paxx
Sox5	5.02208e-05	0.0406154	0.353	0.339	0.576786	1	Sox5
Tmem109	5.02365e-05	0.0204094	0.521	0.509	0.576966	1	Tmem109
Nid1	5.02373e-05	-0.259268	0.999	0.999	0.576975	1	Nid1
Gigyf2	5.04855e-05	0.0297387	0.437	0.412	0.579826	1	Gigyf2
Ints6l	5.07697e-05	0.0500827	0.306	0.248	0.58309	1	Ints6l
Ppig	5.09653e-05	0.0111916	0.649	0.654	0.585336	1	Ppig
Bax	5.11634e-05	-0.165835	0.426	0.547	0.587612	1	Bax
Slc25a28	5.20455e-05	0.0265333	0.431	0.42	0.597743	1	Slc25a28
Ptprj	5.25313e-05	-0.199603	0.098	0.266	0.603322	1	Ptprj
Pias2	5.28986e-05	0.0425322	0.3	0.27	0.607541	1	Pias2
Smap1	5.30551e-05	-0.186096	0.609	0.714	0.609338	1	Smap1
Htt	5.34093e-05	0.0557912	0.269	0.23	0.613405	1	Htt
Sil1	5.42789e-05	0.0496677	0.285	0.236	0.623393	1	Sil1
Ywhaq	5.44765e-05	-0.0182859	0.84	0.862	0.625662	1	Ywhaq
Snrpd2	5.45601e-05	-0.178819	0.634	0.759	0.626623	1	Snrpd2
Ammecr1l	5.50649e-05	0.0363347	0.349	0.322	0.63242	1	Ammecr1l
Apbb2	5.54105e-05	-0.174091	0.441	0.589	0.63639	1	Apbb2
Fbrs	5.63184e-05	0.0565384	0.271	0.214	0.646817	1	Fbrs
Rnf14	5.72282e-05	0.0312603	0.408	0.374	0.657265	1	Rnf14
Naa50	5.79888e-05	0.0221719	0.483	0.468	0.666002	1	Naa50
Top2b	5.84161e-05	0.00606254	0.72	0.709	0.670909	1	Top2b
Meis1	5.85572e-05	0.0362848	0.527	0.482	0.67253	1	Meis1
Ccpg1	5.90519e-05	0.0231922	0.493	0.464	0.678211	1	Ccpg1
Gpkow	5.96207e-05	0.0794933	0.257	0.171	0.684744	1	Gpkow
Serpinb1a	5.9903e-05	-0.234105	0.064	0.231	0.687986	1	Serpinb1a
Rapgef2	6.04571e-05	0.0486049	0.281	0.249	0.694349	1	Rapgef2
Zfhx4	6.09657e-05	-0.197297	0.255	0.374	0.700191	1	Zfhx4
Mark3	6.10645e-05	0.024081	0.492	0.492	0.701326	1	Mark3
Bmp2k	6.1177e-05	0.0288913	0.465	0.448	0.702618	1	Bmp2k
Vps29	6.14006e-05	-0.170394	0.55	0.661	0.705186	1	Vps29
Ankrd28	6.24976e-05	0.0527944	0.278	0.246	0.717785	1	Ankrd28
Copz2	6.26652e-05	-0.148252	0.33	0.46	0.719709	1	Copz2
Hspa4	6.43079e-05	0.0248248	0.489	0.461	0.738576	1	Hspa4
Adgrd1	6.48879e-05	-0.24411	0.718	0.785	0.745238	1	Adgrd1
Tia1	6.55373e-05	-0.156336	0.252	0.36	0.752696	1	Tia1
1700020I14Rik	6.57241e-05	-0.167021	0.476	0.594	0.754842	1	1700020I14Rik
Eps15	6.65924e-05	0.0169618	0.562	0.544	0.764813	1	Eps15
Frmd4b	6.66633e-05	0.0424033	0.466	0.419	0.765628	1	Frmd4b
Flna	6.70469e-05	0.0107509	0.667	0.659	0.770033	1	Flna
Katnbl1	6.76603e-05	-0.16597	0.177	0.318	0.777079	1	Katnbl1
Nsmaf	6.77604e-05	0.0249641	0.479	0.461	0.778229	1	Nsmaf
Msn	6.83923e-05	0.00561552	0.71	0.698	0.785486	1	Msn
Dnajc5	6.86946e-05	0.0249078	0.468	0.455	0.788958	1	Dnajc5
Mrpl54	6.89748e-05	-0.150528	0.343	0.457	0.792176	1	Mrpl54
Commd1	6.92919e-05	-0.152558	0.435	0.552	0.795817	1	Commd1
Fgfr1	7.08173e-05	-0.218872	0.906	0.951	0.813337	1	Fgfr1
Tbc1d5	7.11139e-05	0.0491073	0.274	0.24	0.816743	1	Tbc1d5
Selenos	7.13872e-05	-0.178443	0.522	0.654	0.819882	1	Selenos
Bmpr2	7.19028e-05	-0.00282255	0.788	0.81	0.825804	1	Bmpr2
Rab7	7.30728e-05	-0.0130459	0.797	0.805	0.839241	1	Rab7
Rem1	7.32211e-05	0.0829835	0.272	0.169	0.840944	1	Rem1
Tulp4	7.32324e-05	0.0169586	0.663	0.653	0.841074	1	Tulp4
Slc17a5	7.41002e-05	0.0401613	0.343	0.316	0.851041	1	Slc17a5
Meis2	7.51253e-05	0.00808322	0.801	0.757	0.862814	1	Meis2
Cand1	7.52542e-05	0.0246566	0.438	0.428	0.864295	1	Cand1
C1ra	7.55058e-05	-0.0481188	0.994	0.99	0.867184	1	C1ra
Ids	7.60537e-05	0.0231922	0.469	0.456	0.873476	1	Ids
Tmem30a	7.61561e-05	0.00197696	0.741	0.737	0.874652	1	Tmem30a
Arpc4	7.62588e-05	-0.160212	0.465	0.599	0.875832	1	Arpc4
Phf2	7.68264e-05	0.031705	0.379	0.351	0.882351	1	Phf2
Gnptg	7.71485e-05	0.0301981	0.416	0.405	0.88605	1	Gnptg
Ncstn	7.72461e-05	0.0173861	0.548	0.531	0.887172	1	Ncstn
Kat6a	7.72744e-05	0.0250472	0.454	0.449	0.887497	1	Kat6a
Prkci	7.79891e-05	0.031815	0.324	0.316	0.895705	1	Prkci
Supt6	7.91225e-05	0.029383	0.409	0.403	0.908721	1	Supt6
Bnip3l	7.96089e-05	-0.027583	0.889	0.899	0.914308	1	Bnip3l
1110008F13Rik	8.01416e-05	0.0202718	0.531	0.539	0.920426	1	1110008F13Rik
Ppfibp1	8.12823e-05	0.00602517	0.718	0.699	0.933527	1	Ppfibp1
Pmp22	8.19785e-05	-0.217873	0.912	0.947	0.941523	1	Pmp22
B4galt1	8.20576e-05	0.00441555	0.727	0.724	0.942432	1	B4galt1
Ltbp1	8.22079e-05	-0.0296314	0.934	0.932	0.944158	1	Ltbp1
Hmox1	8.30766e-05	0.0657338	0.316	0.294	0.954135	1	Hmox1
Sec24b	8.37384e-05	0.0255628	0.417	0.399	0.961736	1	Sec24b
Grn	8.37443e-05	-0.0250848	0.896	0.923	0.961803	1	Grn
U2surp	8.40472e-05	0.0138292	0.568	0.59	0.965282	1	U2surp
Atp2b4	8.44401e-05	0.0448479	0.332	0.301	0.969794	1	Atp2b4
Plekhm2	8.48736e-05	0.0386702	0.307	0.286	0.974774	1	Plekhm2
Rmnd5a	8.52147e-05	0.0248719	0.433	0.419	0.978691	1	Rmnd5a
Mex3c	8.57918e-05	-0.147504	0.299	0.416	0.985319	1	Mex3c
Gnb1	8.58548e-05	-0.197142	0.828	0.891	0.986042	1	Gnb1
Usp19	8.70762e-05	0.0236722	0.476	0.472	1	1	Usp19
Tmem63a	8.82895e-05	-0.148549	0.254	0.372	1	1	Tmem63a
Bzw2	8.86567e-05	0.0469266	0.307	0.267	1	1	Bzw2
Nudt4	8.9396e-05	0.0254993	0.473	0.456	1	1	Nudt4
Ppp2r2d	8.99081e-05	0.0168297	0.548	0.543	1	1	Ppp2r2d
Slc31a1	8.99796e-05	0.0762795	0.241	0.178	1	1	Slc31a1
Arf6	9.01278e-05	0.0271381	0.484	0.456	1	1	Arf6
Clk4	9.19758e-05	0.0228914	0.515	0.534	1	1	Clk4
Pfdn1	9.2369e-05	-0.155881	0.426	0.572	1	1	Pfdn1
Itpr2	9.24981e-05	0.0381599	0.374	0.327	1	1	Itpr2
Cystm1	9.28475e-05	0.0969526	0.235	0.152	1	1	Cystm1
Fam120a	9.39372e-05	0.00585371	0.648	0.664	1	1	Fam120a
Maml2	9.41141e-05	0.0341641	0.356	0.332	1	1	Maml2
Pdlim4	9.48501e-05	-0.168988	0.421	0.534	1	1	Pdlim4
Zfp91	9.49919e-05	0.00927181	0.677	0.673	1	1	Zfp91
Tbc1d4	9.55135e-05	0.0443974	0.37	0.319	1	1	Tbc1d4
Ctsf	9.55263e-05	0.00849478	0.704	0.669	1	1	Ctsf
Metap1d	9.5935e-05	0.0394757	0.302	0.268	1	1	Metap1d
Col6a2	9.61368e-05	0.0164833	0.961	0.937	1	1	Col6a2
Rnasel	9.61821e-05	0.0359577	0.367	0.36	1	1	Rnasel
Hspa14	9.64341e-05	0.0313538	0.325	0.304	1	1	Hspa14
Abi2	9.67711e-05	0.0302202	0.4	0.364	1	1	Abi2
Cast	9.85083e-05	-0.207375	0.863	0.903	1	1	Cast
Bmp1	9.87053e-05	-0.217708	0.784	0.847	1	1	Bmp1
Yrdc	9.92501e-05	0.067881	0.255	0.182	1	1	Yrdc
Setd3	0.000100831	0.0243023	0.417	0.405	1	1	Setd3
Ackr1	0.000102417	-0.205025	0.104	0.253	1	1	Ackr1
[truncated: 14,085 more rows]
