# Supplementary material for: Constitutive loss of DNMT3A causes morbid obesity through misregulation of adipogenesis
Source: eLife. 2022 May 30;11:e72359. doi: 10.7554/eLife.72359 (PMC9150890; doi:10.7554/eLife.72359)
Supplement: Figure 5—source data 1. [file elife-72359-fig5-data1.xlsx]

## Sheet: Sheet1
upregulatd_3T3_con	upregulatd_3T3_siDnmt3a	upregulatd_BAC-C4-Con	upregulatd_BAC-C4-KO	Overlap in Dnm3a Kos
Fhl2	Serpinb9f	Efemp1	AU019823	Acer2
Unc80	Mcm3	Trim44	AW209491	Adm
Mreg	Mfsd9	Rbp4	AW549877	Ak4
Rufy4	Col3a1	Mt2	Abca7	Anxa2
Csprs	AK140358	Slc16a3	Abcb6	Apln
Gm7609	Slc40a1	Loxl2	Abcb8	Arc
BC038927	TMEFF2	Gpx3	Abcb9	Atf3
Csprs	Hecw2	AI507597	Abcc4	Basp1
Sp110	Sgol2	AW112010	Abcd3	Bhlhe40
Sp100	Fzd7	Aacs	Abcg1	Bnip3
Fmod	Fam117b	Abcd4	Abhd11	Bsg
Tor3a	P2rx7	Mboat2	Abhd12	Btg2
Pydc4	Serpinb9g	Abhd8	Abhd14a	Ccdc109b
Ifi203	Hmgcs2	Abi2	Abhd14b	Ccdc6
Dpp7	Krt19	Acaa1b	Abhd4	Ccnd3
Mir126	Ankzf1	Acbd4	Abhd5	Cda
Egfl7	Epo	Acer2	Acaa1a	Cdk18
Agpat2	Gmppa	Fam110c	Acacb	Cep170
Prrx2	Inha	Acp1	Acad10	Cep55
Ifih1	5033414K04Rik	Lgals3	Acad11	Chst1
Fam171b	AK012157	Acsm3	Acad9	Cldn15
AK019679	Snora75	S100a4	Acadl	Col15a1
AK079670	4930524B15Rik	Actn1	Acadvl	Col18a1
Gm1337	Pnliprp1	Acvr1b	Acat1	Col3a1
Plcb2	Ghrh	Adck4	Accs	Cryab
Ralgapa2	Fam135b	Ndrg1	Aco1	Cxcl1
Sdcbp2	Gpat2	Adgrg1	Aco2	Dcaf4
Dusp15	Rgs4	Hsf4	Acot13	Ddah1
Mmp9	Acer2	Adk	Acp2	Ddit4
Slc13a3	Ang4	Adm	Acsl4	Dtx4
Znfx1	Epb4.1l5	Adm2	Acss3	Efemp1
Col9a3	Cdhr1	Enpp5	Actr3	Egln1
BC006779	Marco	Adrb3	Acy1	Egln3
Cpa3	Rab42	Sncg	Acyp2	Ehhadh
Nceh1	Slc45a3	Aebp1	Ada	Elf4
Tm4sf1	Cdk18	Ager	Adamts12	Ero1l
Mfsd1	Cntn2	Ago1	Adamts9	Fam110c
AK086005	Ren1	Agpat4	Adck3	Fam117b
Pear1	Serpinb9e	Fam107a	Adcyap1r1	Fam162a
Gm5544	Mybph	Fstl3	Adhfe1	Fam57a
Dennd2d	Alppl2	Agrn	Adig	Fam57b
Csf1	Ptpn7	Peg10	Adtrp	Fam60a
Eps8l3	Nos2	Ahnak	Aggf1	Fblim1
Gpr88	Kif21b	Ak4	Agk	Fgf21
Elovl6	Crb1	Akap2	Agl	Fos
Cyp2u1	Cfh	Isyna1	Agpat3	Fosl1
Gbp3	Fam5c	Akr7a5	Agtpbp1	Fosl2
Ifi44	Gm10494	Akt3	Aifm1	G2e3
Cngb3	ENSMUSG00000073540	Aldh1a1	Ak3	Gas2l3
6230409E13Rik	Ang6	Aldh1a7	Akr1b10	Ghrh
Spag8	Ier5	Aldh1l1	Akr1b7	Gm11110
Cer1	Soat1	Aldh3b1	Alas1	Gpi1
Marcksl1	Tlr7	Amn1	Alcam	Gprc5a
AK082693	4930523C07Rik	Krt19	Aldh2	Grtp1
Isg15	4930562F07Rik	Ankrd27	Aldh3b2	Gsg2
A930005I04Rik	Cenpl	Thtpa	Alkbh8	Hcls1
Nsg1	Dnm3	Ankrd9	Alpl	Hk1
Cd38	Fmo2	Anxa1	Amacr	Hmox1
Cxcl10	Ang3	Lcn2	Amd2	Hp
Gbp9	Gorab	Anxa4	Amotl1	Hrct1
Gbp4	Fgf21	Anxa9	Amotl2	Hspb1
Gbp10	Slc19a2	Htatip2	Ampd2	Htra1
Gbp4	Cyp4f39	Ap2b1	Amy1	Htra3
Gbp11	Uhmk1	Ap3m1	Anapc1	Ier3
Lrrc8c	AK143195	Apbb1	Anapc13	Ier5
Ube2d2	Fcgr4	Apbb1ip	Angel2	Isg20
Pgam5	Sele	Apitd1	Angptl2	Itgae
Asphd2	Atp1a4	Apln	Angptl6	Kazald1
Acacb	Slamf9	Apoa1	Ankrd32	Kbtbd11
Oasl2	Tagln2	Apol6	Ankrd49	Kdm3a
Oas2	Cda	Apol9a	Anxa8	Krt13
Oas1b	Klhl38	Appl1	Aox1	Krt19
Oas1h	Cep170	Aprt	Ap2m1	Krt36
Oas1g	Lbr	Arap1	Ap5m1	Lcn2
Oas1a	1700056E22Rik	Crip2	Apeh	Ldha
Kntc1	Mosc1	Col15a1	Aph1a	Lgals3
Aacs	Otof	Arf4	Apoc1	Limk1
Adap1	Myo16	Arfgap3	Apoc2	Lox
Elfn1	AK006895	Arhgap10	Apoc3	Loxl2
BC046508	Sema3g	Arhgef10	Apoc4	Lrg1
Slc46a3	Serpinb6b	Arhgef17	Apoo	Maff
N4bp2l1	Camk1g	Arhgef25	App	Mgll
A430107O13Rik	Aire	Arhgef39	Arfgef2	Mt1
1110001J03Rik	Serpinb9c	Arl13b	Arfrp1	Mt2
Parp12	Frmd4a	Arl16	Arhgap24	Mthfd1l
Dennd2a	Ccdc3	Arl2bp	Arhgef2	Mxi1
Adcyap1r1	Car9	Arl3	Arhgef6	Myadm
Gadd45a	Itih5	Vldlr	Arhgef9	Ndrg1
Loxl3	Gpr133	Arl6	Arih1	Npepps
AK029023	Fbxw18	Armcx2	Arih2	Npnt
Gxylt2	Gm13315	Arrb2	Arl15	Npr1
Usp18	Dub1	Arrdc1	Armc1	Nxn
Tspan11	Fa2h	Asb3	Arpc5l	P4ha1
Brsk1	Fcna	Spp1	Arrdc3	P4ha2
Gng8	Lhx3	Asl	Arrdc4	P4hb
Kcnn4	Gbgt1	Aspg	Arsb	Pafah1b3
Vrk3	Ntng2	Asph	Asah1	Pak1
Snord35a	Aif1l	Atat1	Aste1	Palb2
Ldhc	Serpina9	Atf3	Atad3a	Pde1b
Prss23	Sh2d3c	Wfdc21	Cox6a2	Pdk1
Trim30a	Hspa5	Atp11a	Atf6	Pdk3
EG625321	Fbp2	Atp8b2	Atg10	Pdxp
Hpx	Morn5	Atxn3	Atg4d	Peg10
Gvin1	Ptgs1	Atxn7l1	Atg7	Pgam1
AK041647	Nr6a1	Axl	Atl2	Pgk1
Gm1966	Gpr35	Azin2	Atp1a2	Piga
Tmc7	8430408G22Rik	B3galt2	Atp1b3	Plekha2
Itgal	Cpa1	B3gnt2	Atp2a2	Plod1
Mettl10	Lypd6b	B4galt2	Atp2a3	Plod2
Cyp2e1	Arl5a	B9d1	Atp2c1	Pold4
Irf7	Cacnb4	BC030867	Atp5a1	Ppme1
Retn	Arl6ip6	BC051226	Atp5b	Ppp1r13l
AK007249	Pkp4	BC068281	Atp5c1	Ppp1r3b
Lamp1	AK166079	Bahd1	Atp5d	Prelid2
Gas6	Scn7a	Baiap2l1	Atp5e	Ptgs1
Ddx60	4930579C15Rik	Basp1	Atp5f1	Rara
Bst2	Plekha3	Bax	Atp5g3	Rassf7
Capns2	Ccdc141	Fgf21	Atp5h	Rcor2
9330175E14Rik	Ypel4	Bcl9l	Atp5j2	Rgma
Psmb10	Ehhadh	Bdh2	Atp5k	Rlf
Afg3l1	Dusp9	Adh1	Atp5l	Rnd2
Fam89a	Cyp2ab1	Bhlhe40	Atp5o	Rnf217
Mmp3	Arhgap1	Bhlhe41	Atp6v1e1	Rtn4rl1
Endod1	Chst1	Bicc1	Atp6v1h	S100a3
Fut4	Prdm11	Bin1	Atpaf2	Sap30
S1pr2	Adora3	Bloc1s3	Atrip	Sbsn
Icam5	Alx4	Bscl2	Atrn	Selenbp1
Ei24	Lman1l	Isg20	Atxn7l3b	Sema3g
Sema7a	Prr5l	Cyp2d22	Auh	Sema4g
Bbs4	Arhgap11a	Brwd1	Azi2	Serpine1
Klhl31	Car12	Syce2	B230208H11Rik	Sh3bgrl3
Gsta4	Bmf	Btd	B230219D22Rik	Slc25a34
1700102P08Rik	5430417L22Rik	Btg2	B3galt1	Slc2a1
Hhatl	Ccdc155	Btrc	B3glct	Slc40a1
Chm	Shc4	Ltc4s	BC005537	Slc44a3
Slc35d3	AK087581	Cacnb3	Bag1	Slc9a5
Fam26e	Ncaph	Ndrg2	Bckdhb	Smyd1
Frk	Olr1	Calm3	Bcl2l13	Snta1
Zfp365	Bcl2l11	Camk2g	Bcl7a	Soat1
AK015956	Slpi	Capg	Blcap	Spata24
Bicc1	5730494N06Rik	Caprin2	Bmi1	Spp1
Mmp11	Mybpc3	Car11	Bnip2	Spsb2
Itgb2	Tmx4	Tmsb10	Bok	Tagln2
Adamtsl5	Ctgf	Card10	Bola1	Tbc1d8b
Sycp3	Jag1	Cbr1	Bola3	Tbl2
Chpt1	Vnn1	Cbr3	Bpnt1	Tgfb1
Lum	Slc24a3	Cbx6	Brpf3	Thbs2
Trhde	P2ry14	Cbx7	C130026I21Rik	Tlcd2
Slc35e3	9230104L09Rik	Ccdc109b	C130074G19Rik	Tmem82
Stat2	Fam110a	Ccdc134	C330006A16Rik	Tnfsf9
Gdf11	Gm4832	Ccdc136	Cab39	Tpm2
Gck	Nepn	Ccdc23	Cab39l	Tpm4
Upp1	6430550D23Rik	Ccdc6	Cabp4	Trem2
Cnrip1	Adam6a	Ccdc66	Cacybp	Ttc39a
Irgm1	Muc13	Ccdc80	Caml	Ugdh
Olfr56	Lpin3	Cchcr1	Capza1	Ulbp1
Gm12250	Hist1h4f	Sh3kbp1	Car3	Ulk3
Igtp	Snta1	Ccl2	Casp8	Vcan
Pld6	Wfdc12	Ccl5	Cav2	Vldlr
Zfp286	Kpna7	Ccl7	Cbx4	Wdr54
Xaf1	BC065997	Bgn	Cc2d2a	Xbp1
Aspa	Ptgis	Ccnd3	Ccar2	Zfp654
Hic1	Atp9a	Ccnf	Ccdc12	Zmiz1
Sarm1	Pappa2	Ccp110	Ccdc122
Ccl7	Aurka	Ccpg1os	Ccdc25
Slfn9	Gnas	Ezr	Ccdc28b
Slfn8	Dnajc5	Cd3eap	Ccdc32
Slfn10-ps	Synpo2	Cd47	Ccdc71
Ccl5	Fabp12	Gas6	Ccdc82
Ccl6	Tectb	Ifitm3	Ccnl1
Msi2	Car3	Cda	Cd1d1
Dhx58	Cyp4a10	Cdc42ep2	Cd36
Hsd17b1	Gpnmb	Cdc6	Cdadc1
Ifi35	Cp	Cdca4	Cdc25a
Dusp3	Skil	Cdca5	Cdc42ep3
Rnf213	3110057O12Rik	Cdh2	Cdk14
AK217856	Gm884	Pdxp	Cdk2
BC075659	Cldn9	Capn6	Cdk2ap1
Dnmt3a	Ckmt2	Cdkn1b	Cdk5rap1
Rsad2	Rarres1	Cdr2	Cdk7
Cmpk2	Trim59	Cdr2l	Cdkal1
4933437F05Rik	C630004H02Rik	Cecr5	Cdo1
Dio2	Col12a1	Cenpm	Cdon
Lgmn	Npr1	Cenpu	Cdv3
Ifi27l2a	S100a3	Cep170	Cep350
Tubb2b	Lce1h	Cep55	Cep63
Nop16	Fam46b	Cerk	Cept1
5133401N09Rik	Snord52	P4ha2	Ces1d
Edil3	Gm129	Cers6	Cfd
Asb14	Txnip	Cetn4	Cflar
Il17rd	Rassf4	Cfap36	Cgrrf1
AK207688	Ptpn22	Gprc5a	Agpat9
Lrrc16b	Ankk1	Arhgap22	Chchd10
Gm6904	Mthfd1l	Chac2	Chchd2
Setdb2	Atxn7l2	Rnf113a2	Chchd3
Ephx2	Hoxb8	Ctsc	Chchd4
Lmo7	A930005H10Rik	Chst12	Chkb
BC037032	Ntsr2	Chst14	Chp1
Cox6c	Slc44a3	Cidea	Chrac1
Rims2	Arhgap29	Cited4	Chrdl1
Ly6e	Catsperg2	Cklf	Chst15
Ly6a	Krt13	Clcf1	Chtop
Apol9a	Serping1	Clcn3	Cisd2
Apol9b	Rasgrf2	Cldn15	Clasp2
Fbln1	AK076984	Mt1	Clk1
Tuba1a	Baalc	Clint1	Clptm1l
Slc4a8	Dmkn	Clmp	Clpx
Nagpa	AK008496	Cmas	Cmc1
Rtp4	Gstcd	Angptl4	Cmc2
AI480653	Mttp	Dtx4	Cnih4
Apod	Meox2	Sprr1a	Cnnm3
Wrb	Gm2016	Cnn2	Cnot10
Mx1	Clca5	Cnp	Cnppd1
Mx2	Ddah1	Cntd1	Cnst
Tmprss2	Egln3	Nfatc4	Coa5
Dcpp2	Lrriq3	Foxg1	Coasy
Slc9a3r2	Ly6f	Naprt	Cobll1
4930528F23Rik	Plag1	Col18a1	Commd3
Tmem204	Tox	Col1a1	Coq5
Gm9705	AK080160	Col3a1	Coq7
H2-K2	Gpr63	Col5a1	Cox10
H2-K1	Pnrc1	Col5a2	Cox11
Col11a2	Zfp292	Arhgdib	Cox4i1
Psmb9	B4galt1	Col6a1	Cox5a
Tap1	Ndrg1	Stxbp2	Cox5b
Psmb8	Tpm2	Col6a3	Cox6a1
Tap2	Hrct1	Gfpt2	Cox6c
Cfb	5430416O09Rik	Colec12	Cox7a2
H2-Q6	Cib4	Coprs	Cox7b
H2-D1	Col15a1	Copz2	Cox7c
H2-Q1	Gipr	Coro1c	Cpped1
H2-Q2	Serpinb1a	S100a6	Cpt1b
H2-Gs10	Zfp462	Cpe	Cr1l
H2-Q6	U09772	Cpne2	Creb1
H2-T23	AK015404	Adssl1	Crot
H2-T9	Zfp618	Creld1	Cry1
H2-Bl	Tnc	Emp2	Cs
H2-t9	Leprel1	Rab15	Csde1
H2-T10	Dner	Cryab	Csrnp1
2410017I17Rik	Hmgcll1	Csf1	Csrp2bp
Gm8909	Tusc1	Csrp2	Cst3
Rab31	Il2rb	Cstf3	Cstf2t
Gm6548	Efemp1	Dcxr	Ctbp1
Mcfd2	Pgm2	Ctif	Ctdsp1
AK088734	Cpa5	Ctps2	Ctdspl
Ctxn3	Pde4b	Hist3h2a	Trim66
Gm4951	Hspb1	Ctsh	Ctsb
F830016B08Rik	Klra9	Cttn	Ctsf
Iigp1	Peg10	Cttnbp2nl	Cul5
BC023105	Ttc39a	Cox7a1	Cux1
Pcyox1l	Stil	Cul7	Cwc22
Ccbe1	AK077157	Cxcl1	Cyb5r4
Unc93b1	Selenbp2	Cxcl12	Cyc1
Kcnk4	AK133303	Cxx1b	Cycs
Olfr1420	Cyp4b1	Cxx1c	Cyp20a1
Mpeg1	Mutyh	Plod1	Cyp2j6
Ifit2	Ptch2	Cyp1b1	Dag1
Ifit3	Btbd19	Scd1	Dalrd3
Gm14446	Ptprf	Cers4	Dbi
I830012O16Rik	Selenbp1	Cyp2s1	Dbt
2010002M12Rik	Sirpa	Cyp39a1	Dcaf11
Ifit1	Kcnq4	Cyp4f16	Dcun1d1
AK156902	Rlf	Cyp4v3	Dcun1d2
Gm16026	Eya4	Agt	Dcun1d3
Csprs	Tmem39b	Cyr61	Ddrgk1
BC147527	Tinagl1	Daglb	Ddt
	C1qtnf1	Dbnl	Ddx3x
	Unc13c	Dcaf4	Ddx51
	Sh3bgrl3	Dcbld2	Ddx6
	Mir210	Ddah1	Deb1
	Mns1	Ddah2	Decr1
	Itgb8	Slc27a3	Dek
	AK030206	Ddost	Deptor
	Sema6b	Ddr1	Des
	Pla2g2e	Ddx11	Atf5
	Dnahc6	Stbd1	Dgcr8
	Bglap-rs1	Ddx58	Dgkd
	AK043690	Dennd2a	Dhcr24
	Eno2	Dfna5	Dhps
	Fblim1	Dgka	Dhrs11
	Pkd1l2	Dlg4	Dhrs4
	Ak4	Dmwd	Dhrs9
	Dnajc16	Dnaaf2	Dhx30
	Rex2	Dnaja4	Dhx36
	AK135471	Dnal1	Dhx9
	Car6	Hoxa10	Dip2a
	Plekhg4	Dnmbp	Dis3
	Vamp3	Dnph1	Dis3l
	Zfp474	Dopey2	Dlat
	Tnfsf9	Dtd2	Dld
	Fam132a	Dtnb	Dna2
	9430015G10Rik	Dtx3	Dnaja3
	Cldn12	Slc2a1	Dnajb14
	Klhl30	Dync1h1	Dnajc13
	Cyp4a32	Dynlt3	Dnajc15
	Tmem45a	Dysf	Dnajc19
	Hgf	E2f5	Dnajc3
	1700096K18Rik	Ebpl	Dnm2
	1700019B03Rik	Ece2	Dock9
	AK089217	Echdc2	Dopey1
	Apln	Edem2	Dpp8
	Fosl2	Eef2k	Dram1
	C330019G07Rik	Efhd2	Dram2
	Cd53	Ulbp1	Dsn1
	Dab1	Itpk1	Dusp18
	Otop1	Egln3	Dusp22
	Cd79b	Egr2	Dusp23
	BC038278	Ehhadh	Dusp28
	Ugdh	Krt13	Dusp4
	Slc13a2	Elf4	Dync1li1
	Itga9	Elmsan1	Dyrk2
	Dcun1d4	Ly6a	Eaf2
	AK144862	Hilpda	Ebf1
	Hopx	Emilin1	Echdc1
	Gm8883	Cyp51	Echdc3
	Ugt2b1	Sh3bgrl2	Eci2
	Dck	Ifngr2	Ecsit
	Slc4a4	Epb4.1l3	Eef1e1
	Cxcl15	Ephx1	Ei24
	Cxcl1	Ephx2	Eif2b4
	Mlph	Epn2	Eif2s3x
	Art3	Ercc1	Ell2
	Hist1h2ae	Erich1	Elovl3
	Ccni	Eps8	Elp4
	Cnot6l	Espl1	Elp6
	Tec	Esyt2	Emc2
	Sbsn	Tmem141	Emc3
	Crlf2	Evc	Emg1
	Ulk1	Evl	En1
	4930515G01Rik	Exd2	Enc1
	Slc25a34	Ezh1	Enpp2
	Dynll1	Btbd6	Epc2
	Tbx3	Acss2	Epm2aip1
	Mme	Faap20	Eprs
	Snap25	Cdk18	Ept1
	Scarb1	Fam111a	Erap1
	Lat2	Fam114a1	Erbb2ip
	Gprc5a	Fam114a2	Esco2
	Tbl2	Fam117b	Esrra
	Fxyd7	Fam129b	Esyt1
	Cldn15	Emp1	Etfa
	Coil	Fam149a	Etfdh
	AK045700	Ddit4	Exoc2
	Fbxo24	Prl2c2	Exoc3
	Irs3	Fam57a	Exog
	C130050O18Rik	Fam57b	Extl3
	Cdh18	Fam89a	F2r
	Cdk8	Fancb	Fabp4
	Rasl11a	Far1	Fads1
	Wdr95	Pafah1b3	Faf2
	Hsph1	Fbf1	Fam117a
	Bdh1	Fbln2	Fam129a
	Col28a1	Fos	Fam13a
	AK040143	Fbxl8	Fam160b2
	B630005N14Rik	Fbxo25	Fam168b
	Foxp2	Fbxo36	Fam175a
	Tes	Fcf1	Fam20c
	Tnfrsf9	Fdxr	Fam21
	Csnk1d	Ffar4	Fam210a
	abParts	Fga	Fam210b
	Fam71f1	Tpd52	Fam213b
	Cpa2	Fhl3	Fam49b
	Fmo3	Fhod1	Fam76b
	A130040M12Rik	Fkbp10	Fam8a1
	Lrp2bp	Flnb	Fam96a
	Tsga14	Flnc	Fars2
	Akr1b7	Flot1	Fastk
	Trim24	Pctp	Fastkd1
	Clcn1	Fmnl2	Fastkd2
	Ezh2	Slc1a4	Fastkd3
	Tmem176a	Fn1	Fbxl3
	Ddc	Ly6e	Fbxo18
	Mpp6	Fosb	Fbxo4
	AK039090	Fosl1	Fbxo9
	9130019P16Rik	Fosl2	Fbxw5
	Fam188b	Foxred2	Fcgrt
	Vmn1r4	Frmd6	Fdxacb1
	Slc22a20	Fstl1	Ffar2
	P4ha2	Fut10	Fgfr2
	Hpgds	Fut11	Fh1
	Smyd1	Fuz	Fibin
	Kdm3a	Fxyd5	Fitm2
	AK045624	Fyn	Fkbpl
	Nod2	G2e3	Fmo1
	Hk2	Map6	Fnbp1
	Edar	G6pdx	Cth
	Cyp26b1	Cald1	Foxred1
	AK079912	Gamt	Gsto1
	AK131825	Gas2l3	Fth1
	Mgll	Gas8	Fuom
	Uroc1	Gata6	Fzd1
	Adamts9	Gbp2	Fzd8
	Oit3	Gbp3	G0s2
	Bhlhe40	Gck	Gadd45g
	Rad18	Gcnt2	Gak
	Il17re	Gdap10	Galt
	Syn2	Gemin8	Ganc
	Trem2	Gen1	Gapvd1
	Serpine1	Gfod2	Gars
	AK140161	Gga2	Gatad1
	Aldoc	Ggh	Gatc
	Spsb2	Ggnbp1	Gbas
	Dnajc5b	Ghrh	Gca
	Vwf	Gins3	Gfm1
	AK048274	Glipr2	Gfm2
	Dusp27	Glrb	Gid8
	Ccdc65	Gls2	Gigyf1
	Panx3	Glt8d1	Ginm1
	Gpr120	Gltp	Gk5
	Lrit1	Gm10560	Glcci1
	Ppp1r3c	Gm11110	Glrx
	2810454H06Rik	Chst1	Gm12338
	Trim71	Gm12942	Gm15417
	Golt1b	Gm15706	Gm1673
	AK005539	Egr1	Gm53
	Ifltd1	Gm3219	Gm5460
	Fam60a	Gm4013	Gm5512
	Myadm	Gmds	Gm5627
	Prkcc	Ifi27l2a	Gm7120
	Spon2	Slfn2	Gmnn
	Peg3	Gng10	Gmppb
	Ccdc8	Gng11	Gna12
	Fam65b	Gng2	Gng12
	Fcrlb	Gnl1	Gng5
	Pvrl2	Gnl3l	Gng7
	Bcl3	Gnpda2	Cdsn
	Fam162a	Gnptg	Gnpnat1
	Tgfb1	Got2	Golga1
	DQ543801	Gpam	Golim4
	Tmc1	Gphn	Gosr1
	C030039L03Rik	Snora52	Gpalpp1
	Siglec15	Gpr19	Gpd1
	Npffr1	Gprc5c	Gpd1l
	Zfp568	Gpx8	Gpd2
	AK014513	Gramd1a	Gpld1
	Hspb6	Nfatc1	Gpx4
	Zbtb32	Grhl1	Gramd1b
	Palmd	Grk5	Grina
	Actr3b	Grtp1	Grk6
	Fam71f2	Gsdmd	Gsta3
	Trfr2	Gsg2	Cgnl1
	Gpi1	Gskip	Gstm1
	Kctd15	Gpt2	Gstz1
	Kcnc3	Gstm5	Gtf2a2
	Mamstr	Cyp27a1	Gtf2i
	Nrn1	H13	Gtf2ird1
	Gucy2g	H2-K2	Gtf2ird2
	Hsd17b14	H2-M3	Gtf3c3
	Ptgs2	H2-T9	Gtf3c6
	Ly49G	Srebf1	Guf1
	Haao	Hace1	Gyg
	Grtp1	Hacl1	H2-DMb1
	AK146937	Hagh	Hacd1
	Ndn	Haghl	Hadha
	Tjp1	Haus6	Hadhb
	Igf1r	Hcls1	Haus3
	Klra1	Hcn2	Haus4
	AK045070	Hdac11	Hcar1
	AK133139	Hdac7	Hcar2
	Rgma	Hdac8	Hcfc1
	Fgl1	Hddc3	Hdgf
	AK006114	Hdgfrp2	Hemk1
	Wdr93	Heatr5a	Heph
	Furin	Spire1	Herc3
	Blm	Hebp2	Hey2
	Mir1839	Herc6	Hfe
	Egln1	Hgd	Hiat1
	Folh1	Hhex	Hiatl1
	Nox4	Hif1a	Hibch
	Kctd14	Higd1a	Higd2a
	Pak1	H2-T23	Hint3
	Arrb1	Hjurp	Hivep1
	Ppme1	Hk1	Hlx
	Dnajb13	Hk1os	Hmgb1
	Kdm4d	Hmgn3	Hmgb3
	Klra15	Galk1	Hmgcs1
	Lox	Hoga1	Hoxa5
	Adm	Pkm	Hoxa7
	Ampd3	Hoxa2	Hoxb5
	Galntl4	Hoxa9	Hoxb5os
	Arntl	Hoxb2	Hoxc13
	Ccdc109b	Hoxc6	Hpd
	Acsm5	Coro6	Hpdl
	Gdf15	P4ha1	Hspb8
	4933427G17Rik	Hps1	Hspd1
	Palb2	Hrct1	Hspe1
	Aqp8	Hs1bp3	Hsph1
	Fam57b	Hs6st1	Hyal2
	Fam57b	Hsd11b1	Hypk
	Htr3a	Hsd17b11	Iars
	AK007112	Hsd3b7	Iars2
	Itga11	Hsp90aa1	Ice2
	Ero1l	Hspa12a	Idh3a
	Prelid2	Hspa13	Idh3b
	Gm5177	Hspa2	Idi1
	AK029726	Hspb1	Ifngr1
	Mt2	Mrap	Ifrd2
	Odf3	Htra1	Rmnd1
	Epyc	Htra3	Ift81
	Dusp8	Ier3	Igf2bp2
	Igf2	Ier5	Ikbkg
	AK039657	Iffo1	Il15ra
	Tspan32	Bnip1	Il1rap
	Gapdh	Gpc1	Immp1l
	Tnfrsf22	Ifitm2	Immt
	Gm12603	Hp	Impdh2
	Slc2a1	Eid2	Ing4
	2310057J16Rik	Ift122	Ip6k1
	Cadm1	Ift140	Ip6k2
	Gm11110	Ift57	Ipo9
	Zc3h12d	Ift74	Ireb2
	Hspa1a	Igfbp7	Isca1
	Mrgprd	Igsf8	Iscu
	4932443I19Rik	Igtp	Isoc1
	AK038428	Iigp1	Itga1
	Arhgap6	Ikbip	Itga6
	Angpt2	Immp2l	Itga7
	Pgk1	Il17ra	Itgb5
	Hs3st6	Impa2	Itm2b
	Alg11	Inpp5k	Itpr1
	Htra4	Insig1	Ivns1abp
	Lrrc4c	Irf1	Jag1
	Erlin2	Tgfb1	Jak3
	Bsg	Irgm2	Jarid2
	AI429214	Isg15	Jazf1
	Cd74	Bsg	Jrkl
	Krt14	Itga5	Kcnk3
	Gapdh	Itgae	Kctd3
	Vegfc	Itpka	Kctd9
	AK138521	Plin2	Kdelc1
	AK141659	Ero1l	Kdm5c
	Hmgb2	Itpripl2	Kdm6a
	Ncan	Ckb	Khdrbs3
	Camk2a	Jmjd6	Kif13b
	A330050F15Rik	Jmjd8	Kiz
	Slc5a7	Prorsd1	Klb
	Nxnl1	Jun	Klf15
	Arc	Junb	Klhl23
	Tpm4	Kank3	Klhl24
	Hmox1	Kbtbd11	Krtcap2
	Ednra	Hpcal1	Lacc1
	Htra3	Kctd17	Lace1
	Elmod2	Kdelr3	Lactb
	Dnajb1	Kdm3a	Lamb2
	Pde1b	Kif23	Lamp2
	Palm3	Kirrel	Lamtor3
	Cacna1a	Klc1	Larp1b
	4921524J17Rik	Col6a2	Lbh
	D830046C22Rik	Klf16	Lctl
	Calr4	St6galnac2	Ldhb
	Lamc2	Klhl2	Leo1
	AK141565	Klhl21	Letm1
	Mt1	Klhl25	Letmd1
	Cx3cl1	Pdlim1	Lgals8
	Ces4a	Kremen1	Lhfpl2
	Slc9a5	Col5a3	Limd1
	AI427809	Krt36	Lin7c
	AK028033	Fam60a	Lin9
	Dpep2	Ksr1	Lipe
	Hp	Lama5	Lman2
	Hydin	Adcy3	Lncbate1
	Tbxa2r	Pgk1	Lpar6
	Bcar1	Ldah	Lpgat1
	Cntnap4	Ldb1	Lrba
	Maff	Leprot	Lrpprc
	Bcmo1	Lgals4	Lrrc39
	Cdh13	Lgals9	Lrrfip2
	P2rx1	Lgr4	Lypla1
	Foxl1	Lhfp	Lyrm4
	AY512943	Emc9	Lzts1
	Filip1l	P4hb	Reep6
	Apoc3	Limd2	Mafg
	AK041328	Limk1	Magohb
	Mmp8	Sdc1	Manba
	E230008N13Rik	Vim	Manf
	Gpr116	Litaf	Map4k4
	Cdkn2d	Lonrf1	Mapkbp1
	Eepd1	Lox	2018-03-02
	Il13	Fam208a	Mat2a
	Cdon	Lrg1	Mat2b
	Myo5c	Lrig1	Mavs
	Olfr1033	Lrp1	Mboat1
	AK084170	Lrpap1	Mc2r
	Ipw	Lrrc1	Mcam
	Tnni3k	Lrrc27	Mccc2
	Plekha2	Lrrc42	Mcts1
	Ddit4	Lrrc45	Mcts2
	Gm5057	Lrrcc1	Mcur1
	Ncam1	Lta4h	Mecom
	Dixdc1	Lxn	Med12
	Cryab	Npr2	Med22
	Arhgap20	Pltp	Mef2d
	Gapdh	Pdk1	Megf9
	Acsbg1	G6pc3	Mertk
	Ulk3	Mad2l1bp	Mettl14
	2310016C08Rik	Mad2l2	Mettl25
	AK020793	Maff	Mettl7a1
	Kbtbd11	Maged2	Mff
	Emb	Malt1	Mfn1
	Gm5523	Map1lc3a	Mfsd8
	cip7	Map1s	Mgst1
	Kbtbd13	Map2k6	Mif4gd
	Rasl12	Map3k12	Mios
	Htra1	Map4k1	Mkks
	Anxa2	Map7d1	Mlh1
	Adam10	Map7d2	Mlst8
	Flrt3	Mapk3	Mlxipl
	Hspa1b	Mapk7	Mmadhc
	3930402G23Rik	Marcksl1	Mmp11
	Bcl2l10	Mast3	Mmp19
	Fbll1	Max	Mnd1
	Cd109	Mbip	Mocs2
	Fgd3	Lhpp	Mon1a
	1190002N15Rik	Me2	Mpc2
	Pcolce2	Med6	Mroh1
	Acpl2	Megf8	Mrpl13
	Foxl2os	Melk	Mrpl15
	Lcn2	Metrn	Mrpl19
	Serpinb9b	Metrnl	Mrpl3
	6430571L13Rik	Mettl21a	Mrpl30
	Mpl	Mettl7b	Mrpl32
	Sema3b	Mfge8	Mrpl34
	Mst1r	Mfng	Mrpl35
	E2f2	Mfsd10	Mrpl36
	Xkr5	Mgat2	Mrpl4
	Ccdc36	Mgll	Mrpl42
	Prkar2a	Mical1	Mrpl44
	Sdc4	Arc	Mrpl47
	3000002C10Rik	Ifi30	Mrpl52
	Sap30	Mis18bp1	Mrpl57
	Cdc25a	Mki67	Mrpl9
	Tnfrsf23	Mkl1	Mrps17
	Als2cl	Mknk2	Mrps2
	Serpinb1b	Mllt1	Mrps26
	Polr3g	Mllt3	Mrps27
	Pkhd1l1	Mospd2	Mrps28
	Acvr2b	Mpp5	Mrs2
	Csrnp1	Desi1	Msh3
	Brca1	Mrc2	Msra
	Ulk4	Mreg	Msrb2
	Cabp1	Psmb9	Mtbp
	Ano1	Atg101	Mtch2
	Fam198a	Mtap	Mterf3
	Pdk1	Rassf7	Mtfp1
	Gm5506	Mthfd1l	Mtmr2
	Cox2	Tgif1	Mtr
	Ppp1r3b	Mthfr	Mtrf1
	Gm6787	Mthfsd	Mtrf1l
	BC019681	Mvd	Mtx1
	As3mt	Mxi1	Mtx2
	Elf4	Mxra7	Mtx3
	Pdcd1lg2	Mxra8	Mut
	AK021262	Myadm	Mxd1
	Fam122b	Mybl2	Mxd4
	Gm773	Myl12b	Myd88
	Ier3	Myo10	Myl6b
	Fhl1	Myo18a	Mylip
	Spp1	Nab2	Mynn
	Ntrk3	Naglu	Myo19
	Gm9790	Nampt	N4bp2l1
	Prrg1	Nans	N4bp2l2
	Npnt	Hoxb6	N6amt1
	4631405J19Rik	Nat2	Naa16
	Spin4	Prps2	Naa20
	Cma1	Ncdn	Naa30
	Cyp2b10	Msl3	Nabp1
	Brwd3	Ndc80	Nacc2
	Chst15	Psmb8	Napepld
	Gla	Ldha	Nat8l
	Armcx4	Rbbp7	Ncoa7
	Tbc1d8b	Nek4	Ncstn
	Hnrnpa1	Nek8	Ndrg3
	Ammecr1	Net1	Ndufa10
	Chrdl1	Tom1l1	Ndufa11
	Sdc3	Kazald1	Ndufa12
	1700018A04Rik	Nfkbia	Ndufa13
	A230072E10Rik	Anxa2	Ndufa4
	Phf8	Nid2	Ndufa5
	Ribc1	Nipa1	Ndufa8
	Iqsec2	Nisch	Ndufaf1
	Kctd12b	Nle1	Ndufaf3
	Prdx4	Nlrc5	Ndufaf4
	Capn3	Nlrx1	Ndufb10
	Phex	Nmi	Ndufb11
	Astn2	Neat1	Ndufb2
	Cdkl5	Npepps	Ndufb3
	Gm5506	Npnt	Ndufb5
	Ptpre	Npr1	Ndufb6
	Steap4	Nqo1	Ndufb9
	AK086660	Nr2f2	Ndufc1
	Rgs17	Rnd1	Ndufs1
	Hist1h2bg	Nrbp2	Ndufs2
	Cyp2c44	Nrg4	Ndufs3
	Car1	Nt5c	Ndufs4
	Atp7b	Ncoa4	Ndufs6
	Cited2	Nubp2	Ndufs7
	Tnfaip3	Nucb1	Ndufs8
	Zcwpw2	Nucb2	Ndufv1
	Loxl2	Nudt16	Negr1
	Ahr	Numbl	Nfkb1
	Efnb2	Nxn	Nfu1
	Col10a1	Gsn	Nhej1
	AK166420	Olfm2	Nhlrc3
	Grik2	Oma1	Nicn1
	Hist1h3d	Osbpl3	Nnmt
	Hes2	Oscp1	Nol7
	Il13ra2	Otub2	Npdc1
	Cish	Chmp2a	Nprl2
	Gm8709	P2rx5	Nqo2
	4632428N05Rik	P3h3	Nr1h3
	Lrrc20	Egln1	Nr2c2
	Serpinb5	Pgam1	Nsun5
	Hk1	Car5b	Nt5m
	Tet1	Pacs1	Nudt17
	Ccdc6	Bst2	Nudt19
	AK135671	Pak1	Nup37
	1110038D17Rik	Palb2	Ociad1
	Ggt1	Palld	Odf3l1
	Atp2b3	Palm	Ogdh
	Col18a1	Papln	Ogfod2
	Plce1	Papss2	Opa1
	AK076692	Pard6g	Optn
	Coro2b	L3hypdh	Osbpl1a
	Rnf126	Txlng	Oxa1l
	Ip6k1	Pcnxl4	Oxsr1
	Elane	Pcolce	Pafah2
	Arid3a	Pcyox1l	Pak1ip1
	Midn	Pdcd4	Parm1
	Cirbp	Pde1b	Parp10
	Gng7	Pdgfrb	Parp3
	Cd28	Hcfc1r1	Parp6
	Fhl4	Pdia5	Paxbp1
	Stab2	Pdia6	Pbx3
	Gas2l3	Acsl5	Pbxip1
	Btg1	Pdk3	Pcca
	Ccdc46	Pdk4	Pccb
	Poc1b	Heg1	Pck2
	Kitl	Pdlim2	Pcmtd1
	Sctr	Pdlim7	Pcmtd2
	Caps2	Pea15a	Pcsk6
	Cpm	Pef1	Pcyox1
	Hmga2	Rab26os	Pdcd6ip
	Srgap1	Pelp1	Pdcl
	Cox4i2	Pex11a	Pde1a
	Zbtb39	Pfkp	Pde4dip
	Ankrd52	Pfn2	Pdgfc
	Cdk2	Ugdh	Pdhx
	Xbp1	Dnm1	Pdk2
	Camk2b	Limk2	Pdpr
	Zfp82	Phax	Pds5a
	Cck	Phf13	Pds5b
	Grap2	Phf7	Pdss1
	AK028422	Phka2	Pdxk
	Ugp2	Phtf1	Pecr
	Rel	Cd9	Peli2
	Kcnj14	Pigf	Per2
	Abcc9	Pigh	Pex1
	A630033H20Rik	Pigs	Pex19
	AK144695	Pik3ip1	Pex7
	Arhgef37	Pim2	Pfkfb2
	Stk10	Bves	Pfkfb3
	Tmie	Pisd-ps1	Phb
	Phf15	C3	Phgdh
	Cdkn2aipnl	Pla2g16	Phldb1
	Adamts8	Pla2g6	Phospho2
	Slc22a4	Pld2	Phpt1
	Hdac9	Pld3	Pign
	Gdap1l1	Plec	Pigq
	Mfap3	Plekha2	Pik3cb
	Alkbh5	Plekha5	Pitpnb
	Serpinb1a	Plekhg2	Pitrm1
	Trpv2	Plekhg6	Pkd2l1
	Stc1	Pycr1	Plcb4
	Gm9524	Plin5	Plcl2
	Ccdc42	Pmepa1	Plin4
	Aurkb	Plk3	Pmf1
	Foxf1a	Hn1	Poc1a
	2810408A11Rik	Plod2	Poc5
	Clec10a	Pls3	Pogk
	Has1	Plscr4	Poldip2
	Itgae	Plxnb2	Poln
	Gsg2	Pmm1	Polr2m
	Rap1gap2	Pmp22	Polr3b
	Rtn4rl1	Pnkp	Polrmt
	Tlcd2	Pnpla3	Pomt1
	Fam57a	Pnpla6	Pon3
	Cubn	Podn	Ppapdc2
	Pipox	Pold4	Ppara
	Ldha	Poli	Ppargc1a
	Clca3	Polm	Ppargc1b
	Tmem97	Polr3h	Ppic
	Lphn3	Pou6f1	Ppip5k2
	Adcy5	Ppap2a	Ppp1cb
	Mir365-2	Fam162a	Ppp1r14b
	Adap2	Ppme1	Ppp1r15b
	Ccl11	Ppp1r13b	Ppp1r3c
	Ccl8	Ppp1r13l	Ppp1r3d
	Fndc8	Ppp1r18	Pptc7
	Emilin3	Ppp1r3b	Ppwd1
	Hsf5	Zxdc	Pradc1
	AK040276	Praf2	Prdx6
	Dmd	Prelid2	Prelp
	Tmem82	Prkab2	Prkaa1
	Comp	Prkcd	Prkar2a
	Itga3	Prkcdbp	Prkar2b
	Arrdc4	Zrsr2	Prkce
	Npepps	Prl2c5	Prkd3
	Mustn1	Prlr	Prpf38b
	AK155239	Prmt2	Prpf4b
	Atf3	Prps1	Psen2
	AU021092	Mipol1	Psmb5
	cdc6	Prpsap1	Chst11
	Rara	Prr13	Psmd9
	Actn3	Eno1	Ptcd2
	Ldb3	Prss36	Ptcd3
	Bnip3	Arhgef5	Ptger1
	Gprin3	Hebp1	Ptges2
	F11r	Psmc1	Ptk2b
	Grb10	H2afj	Ptpmt1
	Taf7l	Ptgr1	Ptpn11
	Rnd2	Ptgs1	Ptpn9
	Fos	Ankrd37	Ptprm
	Cd300lg	Ptprs	Pts
	AK144330	Ptrf	Pttg1
	Arhgap27	Pvr	Pxmp2
	Pdlim4	Dhrs7	Pyurf
	AK047141	Pxdn	Qars
	Lrrc36	Pxn	Qdpr
	Kcnma1	Trappc6a	Qrich1
	Camp	Pyroxd2	Qrsl1
	Itgb4	Qsox1	Rab11b
	mKIAA0585	Rab13	Rab14
	Afmid	Sipa1l1	Rab3d
	Afmid	Agpat6	Rab3gap1
	Socs3	Rab31	Rac3
	Kif26a	Rab3a	Rad17
	Trp63	Irgm1	Rad54l2
	AK077811	Rab40b	Raet1d
	P4hb	Rab4b	Ralgapa2
	Cbr2	Rab9	Raph1
	Camk1d	Rabep2	Rassf6
	1700034E13Rik	Rabl2	Rbbp5
	Tex19.1	Rad51ap1	Rbm39
	Apoa4	Rad51b	Rbm47
	Ranbp3l	Ralgds	Rbm5
	Gbe1	Acot7	Rbm6
	Odc1	Rap2b	Rbmx
	1700030C10Rik	Rara	Rbpms2
	AK133650	Rarg	Rcbtb2
	AK039780	Rarres2	Rchy1
	Gm4983	Rassf2	Rcor3
	Fam110c	Fasn	Rdh13
	AK016225	Rcn3	Rdx
	AK016682	Rcor2	Timm8a1
	Il11	Rdh10	Rev1
	Lipf	Rdh11	Rexo1
	Plxdc1	Rdh5	Rfc3
	Tmem195	Recql	Rfesd
	Nrcam	Relb	Rgl3
	Grem2	Rell1	Rhbdd1
	G2e3	Retn	Rhoa
	Kcnk2	Rgma	Rhot1
	Tcte2	Dok1	Rhou
	Clec14a	Zmym6	Rilp
	Sec23a	Rhebl1	Rint1
	Igsf21	Rhoc	Ripk1
	Rad51l1	Ripk2	Rit1
	Zfp36l1	Ripply3	Rita1
	AK145430	Rlf	Rmi1
	Smoc1	Adgre5	Rnaseh2b
	Dcaf4	Rnaseh1	Rnf123
	Pdk3	Rnaseh2a	Rnf125
	C130039O16Rik	Piga	Rnf130
	Gabre	Rnd2	Rnf149
	Slc34a2	Rnf128	Rnf185
	Ston2	Rnf144b	Rnf2
	Flrt2	Rnf145	Rnf4
	AK039487	Rnf217	Rnf44
	Plod2	Cdk5rap3	Romo1
	Serpina3n	Rogdi	Rora
	4831426I19Rik	Ropn1l	Rorc
	Pgam1	Rps6ka1	Rpe
	AK156148	Rps6ka4	Rpl13a
	5033406O09Rik	Rpusd1	Rpl22l1
	Il15	Rraga	Rpl29
	Fabp9	Rras	Rpl35
	Olfml2a	Rrp12	Rpph1
	Atp8b4	Rrp7a	Rprd2
	Larp4b	Rsu1	Rps23
	Plod1	Rtn4rl1	Rps27l
	Gli3	Rtp4	Rqcd1
	Mos	Rufy4	Rrp9
	Id4	Ruvbl2	Rsbn1
	Zfp389	Rwdd2a	Rtel1
	Pdxp	S100a10	Rtn4ip1
	Hist1h4i	S100a3	Rundc3a
	Hist1h2bj	Bnip3	S100a1
	Lgi4	Ngfrap1	S100a16
	Mc2r	S100pbp	Sacm1l
	AK153534	S1pr3	Sash1
	Hist1h1d	Saa3	Sbk1
	Gldc	Samd14	Scamp3
	Rassf7	Samd9l	Scap
	Styk1	Sap30	Scara5
	Kcna7	Sat2	Scd3
	Hist1h4b	Sav1	Scyl3
	Gm11346	Sbsn	Sdha
	Ms4a1	Scarf2	Sdhb
	Gmnn	Rnh1	Sdhc
	Slc38a4	Xbp1	Sdhd
	Limk1	Sdf2l1	Sdpr
	Cd93	Sdsl	Secisbp2
	Foxf2	Sec14l1	Selt
	Klf4	Sec24d	Sepsecs
	Mxi1	Selenbp1	Serinc3
	A530053G22Rik	Selk	Serpina3c
	Hs3st3a1	Selm	Serpine2
	Stard10	Sema3g	Serpinf1
	Hist1h2ac	Sema4g	Sestd1
	Serpinb9d	Sepn1	Setd2
	Acot1	2018-09-05	Setdb2
	Shroom3	2018-09-06	Sfxn1
	Has2	Sepw1	Sgms1
	Slc38a1	Gja1	Sgpl1
	AK155516	Serpine1	Sgta
	Tcfap2a	Eif4g3	Sh2b2
	Tmem170b	Setd7	Sh3glb1
	4930526D03Rik	Sfi1	Shisa5
	Hspb7	Sh3bgrl	Shmt1
	Ptchd1	Sh3bgrl3	Shmt2
	Ecm2	Sh3bp1	Sidt2
	Omd	Rcc2	Sik2
	Cks2	Sh3glb2	Sike1
	Nfil3	Shkbp1	Sirt1
	Prelid1	Shroom1	Sirt3
	Isca1	Kras	Ski
	AK040640	Sipa1	Skiv2l2
	Gys1	Pwwp2b	Slc12a2
	Aknad1	Siva1	Slc12a7
	Slc6a7	Slc11a2	Slc16a10
	Ptch1	Slc12a4	Slc17a5
	Zfp367	Slc25a34	Slc18b1
	AK029746	Slc25a45	Slc1a3
	Ell2	Slc27a1	Ank
	Nr2f1	Errfi1	Slc22a12
	Krt36	Slc29a1	Slc25a11
	Fam186a	Lipa	Slc25a16
	AB341556	Slc35b2	Slc25a20
	AK040967	Slc35e4	Slc25a22
	Wdr52	Slc35g1	Slc25a26
	Ulbp1	Snta1	Slc25a3
	Homer1	Slc39a6	Slc25a32
	Zbed3	Slc39a8	Slc25a36
	Rs1	Slc40a1	Slc25a40
	AK006690	Slc41a1	Slc25a46
	Cd180	Gtf2e2	Slc25a5
	Erbb2ip	Slc44a2	Slc26a6
	Zswim6	Slc44a3	Slc30a5
	Map3k1	Slc4a7	Slc36a2
	Ankrd55	Ier2	Slc38a2
	Itga1	Gnb1l	Slc38a7
	4833403I15Rik	Ydjc	Slc4a2
	Lbp	Slc9a3r1	Slc6a6
	Zmiz1	Slc9a3r2	Slc7a1
	Lrtm1	Slc9a5	Smad5
	Tns4	Akip1	Smad6
	Itih3	Smad3	Smarcb1
	Rian	Smap2	Smarcc1
	Ppm1h	Slc43a3	Smarcd3
	Anxa8	Smc5	Smim10l1
	Lmod1	Smchd1	Cyb5r1
	AK090209	Smim5	Smurf1
	Lamb3	Smim8	Snap23
	Pcdhb6	Clic1	Snhg6
	E030003E18Rik	Sms	Snora43
	AK007836	Smtn	Sntb1
	Slc7a8	Smyd1	Snx14
	Ear2	Snap47	Snx17
	Krt80	Ctf1	Snx18
	Isg20	Snhg18	Snx21
	Mapk1ip1l	Snhg3	Snx7
	Lgals3	Smarcd2	Socs4
	EG624367	Snrpn	Sod2
	AK013046	Syngr2	Sorbs1
	A930018M24Rik	Snx6	Sorbs3
	Akap6	Soat1	Sord
	Wdr54	Socs2	Sort1
	AK078979	Sod1	Spopl
	Msra	Fblim1	Sptlc3
	Clu	Spata24	Srd5a3
	Bnip3l	Spata6	Srek1
	Ebf2	Spidr	Srek1ip1
	Adam28	Dpep1	Srprb
	AK016661	Spry4	Ssbp4
	Lrg1	Spryd3	Ssh2
	Hr	Spsb2	St3gal4
	Slc25a30	Sptlc2	Stag1
	Cpt1b	St3gal1	Sulf2
	9630013A20Rik	St3gal2	Stap2
	Pcdh9	St3gal5	Stard13
	Gpc6	Sh3bp5	Stard5
	Ptger4	St6galnac4	Stard7
	Gdnf	St6galnac6	Stau2
	Mif	Stat3	Steap1
	Skp2	Hmox1	Steap4
	Meig1	Stk38l	Stk16
	Basp1	Strada	Stk24
	Dap	Stxbp1	Stradb
	Rnf19a	Syap1	Strip2
	AK002663	Tst	Stt3b
	Alpl	Syde2	Stx18
	Ccdc40	Syne2	Sub1
	Epb4.1l4b	Syngr1	Sucla2
	Gm514	Tagln2	Suclg1
	Atad2	Tap1	Sugt1
	Slc22a2	Npc2	Supt16
	5830416P10Rik	Tapbp	Supv3l1
	Adcy7	Tbc1d10a	Surf6
	Eif2c2	Tbc1d16	Svep1
	6030408B16Rik	Tbc1d22a	Syne1
	Masp1	Tbc1d8b	Sys1
	Gpihbp1	Tbcb	Taco1
	Eppk1	Tbcd	Tada1
	Spatc1	Tbkbp1	Tada2b
	A330040F15Rik	Tbl2	Taf2
	EG232599	Tmco4	Tank
	Gpr141	Tcaf1	Tatdn1
	Inhba	Tcof1	Tatdn2
	Srcin1	Tctex1d2	Tbc1d13
	Parvb	Tdrd7	Tbc1d24
	Tex19.2	Tead2	Tbc1d4
	Slc2a13	Pcgf6	Tbce
	Gm4371	Tecpr2	Tbk1
	Steap1	Tecr	Tbl1x
	Apol7a	Ten1	Tbrg4
	Ly-49Q	Tfcp2	Tcaim
	Arf3	Tfrc	Tcea1
	AK016307	Cox16	Tcp11l2
	St6gal1	Ccser2	Tdrd3
	Epha8	Eif2b2	Tdrkh
	Nova1	Tha1	Tenm4
	Krt79	Thbs1	Tep1
	4933406I18Rik	Thbs2	Tfb2m
	Krt18	Them6	Tgds
	AK035706	Thnsl2	Tgfbr3
	Smug1	Ticrr	Hspa9
	Cbx5	Timp1	Thap2
	Hnrnpa1	Tjap1	Them4
	4930486L24Rik	Tjp2	Thumpd2
	1300017J02Rik	Tlcd1	Thyn1
	Myh11	Tlcd2	Timm10
	Snai2	Tm7sf3	Timm17a
	2310008H04Rik	Tmco6	Timm8b
	Hic2	Tmem107	Tm9sf1
	Emilin2	Tmem110	Tm9sf2
	Piga	Tmem119	Tma7
	Parm1	Tmem132a	Tmbim6
	AK048775	Tmem159	Tmcc3
	AK144897	Tmem18	Tmco1
	Prtg	Tmem184b	Tmed1
	Pcdh17	Tmem198b	Tmed5
	AK039608	Tmem206	Tmem106b
	Slc12a8	Tmem231	Tmem115
	Tmsb4x	Tmem251	Tmem126a
	AK141187	Tmem37	Tmem129
	A830007P12Rik	Tmem41a	Tmem131
	Ccdc58	Tmem45b	Tmem14c
	Hcls1	Tmem50b	Tmem161b
	Polq	Tmem63a	Tmem176a
	4932425I24Rik	Tmem82	Tmem176b
	Ccr7	Gpi1	Tmem182
	Serpina3g	Tmsb15b1	Tmem241
	Cd200r3	Tmsb15l	Tmem33
	Plcxd2	Tnfrsf10b	Tmem43
	5330426P16Rik	Tnfrsf12a	Tmem62
	Alcam	Tnfsf9	Tmx2
	Tfg	Tnk2	Tns1
	Gdf5	Tnrc6a	Tomm40l
	AK085969	Zfp277	Tomm5
	Zfp654	Rad51d	Topbp1
	Enpep	Tpd52l1	Tor1aip1
	Btg3	Tpi1	Tpk1
	Adamts5	Tpm2	Tpt1
	Clca6	Tpm4	Traip
	Rnf186	Snapc1	Trappc13
	Epn3	Tpst1	Triap1
	Kdm4b	Trabd2b	Trib3
	Mef2b	Tradd	Trim35
	Olfr976	Trappc2	Trim46
	Thbs2	Trappc5	Trim56
	Lix1	Hacd2	Trp53inp2
	Myocd	Trem2	Trpm7
	AK142664	Trib1	Tsc1
	Prss27	Trim12a	Tsnax
	Tbc1d24	Trim12c	Tspan18
	Niacr1	Trim3	Tspan3
	Rgs11	Trim32	Tspan7
	Neurl1b	Trim47	Ttc23
	Dusp1	Triobp	Ttc32
	Ppard	Trip10	Ttc37
	Srpk1	Trp53inp1	Ttc38
	Abcg1	Tsc22d1	Ttl
	Pdxk-ps	Tsc22d3	Tusc2
	Notch3	Tspan4	Txn2
	Pafah1b3	Tspan5	Txndc15
	Ccl9	Tspan6	Txndc9
	Cacnb2	Tspan9	Txnrd1
	Trim63	Hspb11	Uba3
	Hspa1l	Ttc39a	Uba5
	4930505A04Rik	Ttc39c	Ubac1
	Nrm	Ttc8	Ubd
	Tnfrsf21	Ttll1	Ube2f
	Zpbp2	Ttll12	Ube3b
	Pla2g7	Tuba1a	Ube3c
	Ecm1	Tubb5	Ube4a
	Cd200r2	Tube1	Ubp1
	Klhdc3	Tulp3	Ubqln1
	Ccnd3	Mapk12	Ubr3
	Tomm6	Ubald1	Ubxn4
	Phlda1	Ube2e1	Ufc1
	Daam2	Ube2l6	Ugt1a6b
	Kif6	Ube2o	Uhmk1
	Rftn1	Ucp2	Unc50
	Dazl	Tap2	Uqcc1
	Ttc25	Ulk3	Uqcr10
	Epm2a	Unc119	Uqcr11
	Arrdc3	Ppap2c	Uqcrb
	P4ha1	Ift43	Uqcrc1
	Mbnl3	Usp18	Uqcrfs1
	Gramd2	Usp22	Uqcrq
	Btn2a2	Usp49	Urm1
	Cpa4	Vamp5	Usp19
	Cox6a2	Vasn	Usp4
	Slc8a1	Vasp	Utrn
	Pkdcc	Vat1	Uxs1
	Pkm2	Vcan	Vegfc
	Pfkl	Vcpkmt	Vill
	Zfp36l2	Cyb5r3	Vopp1
	Gm5057	Vrk2	Vprbp
	Mpp7	Vti1b	Vps11
	Fzd8	Wasf1	Vps13c
	Hfm1	Wbp5	Vps26a
	BC005764	Wdpcp	Vps33a
	Sft2d3	Wdr35	Vwa8
	Lims2	Wdr54	Vwa9
	Spata24	Wdr55	Wdfy1
	Hbegf	Wdr81	Wdfy2
	Pcdha1	F3	Wdr41
	Pcdhb5	Wnk4	Wdr6
	2010011I20Rik	Wrb	Wdr76
	Pcdhb7	Wsb1	Wdr82
	Pcdhb9	Cuedc1	Wls
	Kcnj15	Wwp2	Wwtr1
	Klf10	Nt5dc2	Xist
	Trpm6	Xdh	Xpo4
	Asf1b	Xpnpep1	Xpot
	Ces1e	Yipf1	Xrn1
	Syt14	Ylpm1	Ythdf3
	Znf608	Zbtb4	Zak
	Prrc1	Zc3h12a	Zbed3
	Prx	Zc3h7a	Zbed5
	Vcan	Josd2	Zbed6
	BC025054	Zdhhc24	Zbtb18
	Sh3gl3	Zdhhc9	Zbtb2
	Acsm2	Zfp13	Zbtb43
	mKIAA1629	Zfp36	Zbtb5
	Rin3	Zfp385a	Zbtb7a
	Inhbb	Zfp516	Zcchc9
	Lipg	Zfp553	Zcwpw1
	Rnf217	Zfp654	Zfand1
	Mbp	Zfp692	Zfp106
	Zfp407	Zfp703	Zfp110
	1810055G02Rik	Zfp821	Zfp131
	AK081788	Zfyve21	Zfp219
	Pold4	Zmiz1	Zfp335
	Crtac1	Zyx	Zfp397
	Rin1	Zfp68	Zfp503
	Fosl1	Zfp868	Zfp609
	AK148054	Zfp961	Zfp639
	Ppfia4	Zfyve16	Zfp651
	Nrxn2	Zhx2	Zfp653
	Rcor2	Zkscan3	Zfp68
	Gm5057	Zkscan8	Zfp868
	Cybasc3	Zmym5	Zfp961
	Btg2	Zmynd11	Zfyve16
	Dtx4	Znf512b	Zhx2
	Lancl3	Znrf2	Zkscan3
	Specc1	Zscan26	Zkscan8
	Limch1	Zscan29	Zmym5
	Cep55	Zzz3	Zmynd11
	AK089615		Znf512b
	AK019124		Znrf2
	Mamdc2		Zscan26
	Vldlr		Zscan29
	Ppp1r13l		Zzz3
	2210409E12Rik
	AK050164
	Kif20b
	Ankrd1
	Hectd2
	Per1
	Myof
	Klhl33
	Casp6
	Ggta1
	Nxn
	Cyp2c70
	Aldh18a1
	Frat2
	Pole2
	Golga7b
	Hist1h3f
	Loxl4
	Snrk
	Erlin1
	Sema4g
	Kazald1
	2010012O05Rik
	Cacna2d2
	Col17a1
	BC048080
	Gm10790
	Dusp5
	Dscc1
	Krt78
	1600014C23Rik
	Nanos1
	AK083703
	Ablim3
