# Supplementary material for: Constitutive loss of DNMT3A causes morbid obesity through misregulation of adipogenesis
Source: eLife. 2022 May 30;11:e72359. doi: 10.7554/eLife.72359 (PMC9150890; doi:10.7554/eLife.72359)
Supplement: Figure 6—source data 1. [file elife-72359-fig6-data1.xlsx]

## Sheet: Supp-Table4-NT-NES
pathway	padj in BAC NT	BAC_NTP_NES_score	scRNA transition padj	scRNA transition_NES_score
HALLMARK_ADIPOGENESIS	0.260811	-1.22542	0.000559049	1.89174
HALLMARK_ALLOGRAFT_REJECTION	0.24367	-1.2967	0.000623338	-1.73129
HALLMARK_ANDROGEN_RESPONSE	0.591119	0.985731	0.640205	-0.975989
HALLMARK_ANGIOGENESIS	0.277704	1.36902	0.508266	-1.09298
HALLMARK_APICAL_JUNCTION	0.332142	1.16922	0.0515393	-1.43834
HALLMARK_APICAL_SURFACE	0.581657	-1.02128	0.624108	-0.98382
HALLMARK_APOPTOSIS	0.0179516	-1.66069	3.1e-05	-1.86012
HALLMARK_BILE_ACID_METABOLISM	0.277704	-1.27412	0.934211	0.728788
HALLMARK_CHOLESTEROL_HOMEOSTASIS	0.409509	-1.15666	0.531789	-1.03889
HALLMARK_COAGULATION	0.537121	-1.07077	0.209298	-1.27205
HALLMARK_COMPLEMENT	0.430571	-1.1136	0.000489186	-1.73651
HALLMARK_DNA_REPAIR	0.999736	-0.536078	0.221502	-1.2242
HALLMARK_E2F_TARGETS	0.999736	0.711278	0.657644	-0.95217
HALLMARK_EPITHELIAL_MESENCHYMAL_TRANSITION	0.00650941	-1.70475	0.00555153	-1.55778
HALLMARK_ESTROGEN_RESPONSE_EARLY	0.0380271	-1.57526	0.221502	-1.22099
HALLMARK_ESTROGEN_RESPONSE_LATE	0.0660899	-1.47103	0.645022	-0.970714
HALLMARK_FATTY_ACID_METABOLISM	0.344075	-1.16383	0.707189	-0.894176
HALLMARK_G2M_CHECKPOINT	0.624035	-0.962209	0.703763	-0.904523
HALLMARK_GLYCOLYSIS	0.00157399	-1.80545	0.531789	-1.032
HALLMARK_HEDGEHOG_SIGNALING	0.240066	-1.44876	0.269679	-1.27141
HALLMARK_HEME_METABOLISM	0.338524	-1.16712	0.508266	-1.05485
HALLMARK_HYPOXIA	0.00143211	-1.8054	2.81e-06	-1.93639
HALLMARK_IL2_STAT5_SIGNALING	0.00116691	-1.89676	0.0515393	-1.43237
HALLMARK_IL6_JAK_STAT3_SIGNALING	0.338524	-1.22734	3.1e-05	-1.99293
HALLMARK_INFLAMMATORY_RESPONSE	0.0467905	-1.57727	1.67e-09	-2.24039
HALLMARK_INTERFERON_ALPHA_RESPONSE	0.581657	-1.00312	0.000804339	-1.75928
HALLMARK_INTERFERON_GAMMA_RESPONSE	0.0380271	-1.53867	1.67e-09	-2.24436
HALLMARK_KRAS_SIGNALING_DN	0.260811	-1.3258	0.508266	-1.07008
HALLMARK_KRAS_SIGNALING_UP	0.0570648	-1.52129	0.221502	-1.22138
HALLMARK_MITOTIC_SPINDLE	0.999736	0.691215	0.169801	-1.26021
HALLMARK_MTORC1_SIGNALING	0.00143211	-1.75618	0.066709	-1.36752
HALLMARK_MYC_TARGETS_V1	0.0660899	-1.40132	0.314658	-1.14274
HALLMARK_MYC_TARGETS_V2	0.0747063	-1.52999	0.663699	-0.91649
HALLMARK_MYOGENESIS	0.304232	-1.21589	0.290851	1.16668
HALLMARK_NOTCH_SIGNALING	0.666637	0.895383	0.531789	-1.03444
HALLMARK_OXIDATIVE_PHOSPHORYLATION	0.999736	0.676519	0.169801	-1.23878
HALLMARK_P53_PATHWAY	0.0570648	-1.47001	0.000623338	-1.70071
HALLMARK_PANCREAS_BETA_CELLS	0.581657	-1.01998	0.660157	-0.923354
HALLMARK_PEROXISOME	0.624035	-0.955517	0.663699	-0.923278
HALLMARK_PI3K_AKT_MTOR_SIGNALING	0.964632	-0.742184	0.066709	-1.40323
HALLMARK_PROTEIN_SECRETION	0.957347	-0.761964	0.221502	-1.22945
HALLMARK_REACTIVE_OXYGEN_SPECIES_PATHWAY	0.581657	-1.0358	0.221502	-1.29307
HALLMARK_SPERMATOGENESIS	0.624035	-0.961671	0.663699	0.910256
HALLMARK_TGF_BETA_SIGNALING	0.581657	0.997891	0.0198058	-1.64126
HALLMARK_TNFA_SIGNALING_VIA_NFKB	0.0213851	-1.60439	1.67e-09	-2.45015
HALLMARK_UNFOLDED_PROTEIN_RESPONSE	0.0642618	-1.50059	0.432631	-1.1109
HALLMARK_UV_RESPONSE_DN	0.240066	-1.2821	0.0198058	-1.51882
HALLMARK_UV_RESPONSE_UP	0.0570648	-1.50709	0.00437295	-1.63085
HALLMARK_WNT_BETA_CATENIN_SIGNALING	0.548874	1.06707	0.256683	-1.28275
HALLMARK_XENOBIOTIC_METABOLISM	0.0660899	-1.4498	0.0580854	1.40214
