# Supplementary material for: Constitutive loss of DNMT3A causes morbid obesity through misregulation of adipogenesis
Source: eLife. 2022 May 30;11:e72359. doi: 10.7554/eLife.72359 (PMC9150890; doi:10.7554/eLife.72359)
Supplement: Figure 6—source data 2. [file elife-72359-fig6-data2.xlsx]

## Sheet: Supp-Table5-d6-NES
pathway	padj in BAC diff day 6	BAC_d6_NES_score	scRNA committed padj	scRNA committed_NES_score
HALLMARK_ADIPOGENESIS	3.81e-05	1.88938	0.752615	-0.942823
HALLMARK_ALLOGRAFT_REJECTION	6.23e-05	-2.02577	0.00384524	-1.5544
HALLMARK_ANDROGEN_RESPONSE	0.70665	0.936738	0.752615	-0.919584
HALLMARK_ANGIOGENESIS	0.319792	-1.26843	0.058554	-1.55787
HALLMARK_APICAL_JUNCTION	0.00157761	-1.77404	0.00137886	-1.61773
HALLMARK_APICAL_SURFACE	0.460788	-1.14681	0.00645351	-1.75105
HALLMARK_APOPTOSIS	0.00546726	-1.68252	0.00661115	-1.52123
HALLMARK_BILE_ACID_METABOLISM	0.363228	1.14511	0.562278	-1.05517
HALLMARK_CHOLESTEROL_HOMEOSTASIS	0.276941	1.2159	0.88726	-0.767294
HALLMARK_COAGULATION	0.00117887	-1.92312	0.000615806	-1.74936
HALLMARK_COMPLEMENT	0.00195424	-1.766	0.000163267	-1.7177
HALLMARK_DNA_REPAIR	0.603474	-1.00242	0.347043	-1.1398
HALLMARK_E2F_TARGETS	0.193755	1.19032	0.993821	-0.602934
HALLMARK_EPITHELIAL_MESENCHYMAL_TRANSITION	4.32e-16	-2.59052	0.00310044	-1.53352
HALLMARK_ESTROGEN_RESPONSE_EARLY	0.0447127	-1.48964	0.60974	-1.01196
HALLMARK_ESTROGEN_RESPONSE_LATE	0.0613909	-1.45499	0.0840489	-1.29402
HALLMARK_FATTY_ACID_METABOLISM	0.770505	-0.898317	0.467775	-1.09977
HALLMARK_G2M_CHECKPOINT	0.886596	0.851167	0.76775	-0.921333
HALLMARK_GLYCOLYSIS	0.0682258	-1.40305	0.0967462	-1.28158
HALLMARK_HEDGEHOG_SIGNALING	0.886596	-0.68217	0.00661115	-1.74096
HALLMARK_HEME_METABOLISM	0.578264	1.02292	0.628874	-1.00569
HALLMARK_HYPOXIA	0.603474	-1.00058	0.000351627	-1.62706
HALLMARK_IL2_STAT5_SIGNALING	0.0448194	-1.48007	0.0983619	-1.27945
HALLMARK_IL6_JAK_STAT3_SIGNALING	0.00117887	-1.94953	0.000511288	-1.76666
HALLMARK_INFLAMMATORY_RESPONSE	2.12e-05	-2.06759	4.49e-08	-1.94237
HALLMARK_INTERFERON_ALPHA_RESPONSE	3.81e-05	-2.09216	0.00661115	-1.61478
HALLMARK_INTERFERON_GAMMA_RESPONSE	2.33e-10	-2.35618	2.03e-06	-1.80136
HALLMARK_KRAS_SIGNALING_DN	0.578264	-1.03595	0.824012	-0.84819
HALLMARK_KRAS_SIGNALING_UP	2.08e-05	-2.06221	0.058554	-1.34255
HALLMARK_MITOTIC_SPINDLE	0.801995	-0.876313	0.240249	-1.17984
HALLMARK_MTORC1_SIGNALING	0.67038	0.976896	0.0967462	-1.27666
HALLMARK_MYC_TARGETS_V1	0.000176465	-1.83306	0.499671	-1.07512
HALLMARK_MYC_TARGETS_V2	0.014655	-1.7085	0.951477	-0.687345
HALLMARK_MYOGENESIS	0.0642516	-1.45189	0.330027	-1.15459
HALLMARK_NOTCH_SIGNALING	0.770505	-0.83974	0.530099	1.03673
HALLMARK_OXIDATIVE_PHOSPHORYLATION	0.603474	1.00436	0.058554	-1.30065
HALLMARK_P53_PATHWAY	0.193755	-1.26009	0.0967462	-1.27618
HALLMARK_PANCREAS_BETA_CELLS	0.102194	-1.5624	0.0330607	-1.60701
HALLMARK_PEROXISOME	0.85412	-0.794423	0.079967	-1.36797
HALLMARK_PI3K_AKT_MTOR_SIGNALING	0.295609	-1.21654	0.202661	-1.23042
HALLMARK_PROTEIN_SECRETION	0.999329	-0.500623	0.840346	-0.845092
HALLMARK_REACTIVE_OXYGEN_SPECIES_PATHWAY	0.102194	-1.48339	0.058554	-1.47861
HALLMARK_SPERMATOGENESIS	0.578264	1.02911	0.88726	-0.768529
HALLMARK_TGF_BETA_SIGNALING	0.770505	-0.852872	0.752615	-0.913885
HALLMARK_TNFA_SIGNALING_VIA_NFKB	0.000171835	-1.89339	5e-09	-1.99221
HALLMARK_UNFOLDED_PROTEIN_RESPONSE	0.699026	-0.943323	0.572168	-1.03948
HALLMARK_UV_RESPONSE_DN	0.00157761	-1.76675	0.0840489	-1.31273
HALLMARK_UV_RESPONSE_UP	0.194986	-1.27712	0.058554	-1.37731
HALLMARK_WNT_BETA_CATENIN_SIGNALING	0.838672	-0.76557	0.262745	-1.24826
HALLMARK_XENOBIOTIC_METABOLISM	0.00546726	-1.66399	0.604883	-1.02112
