# Supplementary material for: Constitutive loss of DNMT3A causes morbid obesity through misregulation of adipogenesis
Source: eLife. 2022 May 30;11:e72359. doi: 10.7554/eLife.72359 (PMC9150890; doi:10.7554/eLife.72359)
Supplement: Figure 8—source data 1. [file elife-72359-fig8-data1.xlsx]

## Sheet: 201215_adipo_dmra_hypo
chrom	start	end	locus_id	WT_8w	WT_1y	signal.diff	HET_8w	HET_1y
chr1	21323702	21323902	HYPO125	0.633318	0.0722222	0.561096	0.380584	0.528547
chr1	21544827	21545044	HYPO127	0.699315	0.230952	0.468363	0.51924	0.640877
chr1	36318590	36319284	HYPO228	0.646519	0.309982	0.336537	0.274405	0.571143
chr1	36353237	36353915	HYPO232	0.57854	0.242579	0.335961	0.375	0.438911
chr1	36366305	36366754	HYPO235	0.462013	0.118718	0.343295	0.333333	0.236919
chr1	36854050	36854802	HYPO255	0.658186	0.208507	0.449679	0.447111	0.513335
chr1	37925811	37925991	HYPO278	0.635201	0.274102	0.361099	0.379361	0.608355
chr1	38721177	38721624	HYPO288	0.730842	0.253807	0.477034	0.787355	0.767922
chr1	39146582	39146986	HYPO302	0.476656	0.170629	0.306027	0.579188	0.386735
chr1	39791323	39791489	HYPO322	0.587228	0.263596	0.323632	0.377116	0.484199
chr1	53902034	53902946	HYPO436	0.602948	0.279885	0.323063	0.518687	0.370223
chr1	56065288	56065351	HYPO468	0.654834	0.287823	0.367012	0.496825	0.396614
chr1	62922316	62922696	HYPO556	0.665305	0.232924	0.432381	0.570913	0.681886
chr1	64236011	64236356	HYPO586	0.488433	0.178399	0.310034	0.369457	0.267621
chr1	65932903	65932994	HYPO609	0.6	0.174339	0.425661	0.54	0.377876
chr1	67034093	67034553	HYPO618	0.580302	0.265343	0.314958	0.355495	0.492569
chr1	74114436	74114692	HYPO687	0.521164	0.19	0.331164	0.75	0.364484
chr1	78699340	78699464	HYPO815	0.530303	0.0661058	0.464197	0.279167	0.364583
chr1	79707489	79708729	HYPO825	0.520215	0.194673	0.325543	0.335673	0.281749
chr1	80386257	80386563	HYPO833	0.646465	0.292322	0.354143	0.415873	0.546033
chr1	82812579	82812882	HYPO853	0.577651	0.214323	0.363328	0.307694	0.375274
chr1	87583735	87584211	HYPO870	0.637218	0.215238	0.421981	0.3166	0.494227
chr1	88125423	88125609	HYPO887	0.690166	0.271102	0.419064	0.467803	0.789363
chr1	88321633	88321851	HYPO896	0.514626	0.18125	0.333376	0.319345	0.428968
chr1	94968036	94968290	HYPO1078	0.597197	0.277848	0.319349	0.372709	0.52787
chr1	127363270	127363551	HYPO1239	0.533755	0.160564	0.373191	0.318291	0.422258
chr1	127510788	127510835	HYPO1243	0.614647	0.107955	0.506692	0.559524	0.537049
chr1	132734956	132735172	HYPO1291	0.610615	0.19053	0.420084	0.358044	0.381315
chr1	132915973	132916242	HYPO1293	0.638906	0.281667	0.35724	0.619048	0.340134
chr1	133462669	133462916	HYPO1313	0.505135	0.108283	0.396852	0.244097	0.371289
chr1	135347724	135347981	HYPO1422	0.545321	0.18765	0.357671	0.302814	0.239294
chr1	135783760	135783908	HYPO1435	0.591156	0.142857	0.448299	0.402494	0.252431
chr1	138151703	138152014	HYPO1547	0.592208	0.181111	0.411097	0.261904	0.314066
chr1	138905500	138905683	HYPO1570	0.448377	0.0813491	0.367028	0.40211	0.450975
chr1	140071777	140072348	HYPO1577	0.617566	0.231235	0.386331	0.603297	0.623827
chr1	145763743	145763955	HYPO1601	0.632218	0.235637	0.396581	0.348072	0.522756
chr1	145766298	145766794	HYPO1602	0.646158	0.238571	0.407587	0.292063	0.426768
chr1	153117882	153118065	HYPO1628	0.594805	0.0701396	0.524666	0.227143	0.403977
chr1	154275437	154275801	HYPO1649	0.57407	0.227521	0.346548	0.485352	0.575846
chr1	158214448	158214692	HYPO1749	0.686322	0.291013	0.395309	0.550671	0.547046
chr1	163827483	163827696	HYPO1834	0.640045	0.245641	0.394404	0.597094	0.395826
chr1	169175374	169175653	HYPO1928	0.670467	0.314407	0.356061	0.333333	0.491394
chr1	173118508	173118718	HYPO2010	0.651584	0.228252	0.423331	0.354894	0.433261
chr1	173134029	173134239	HYPO2013	0.5875	0.1	0.4875	0.75	0.244444
chr1	173492026	173492186	HYPO2038	0.687528	0.297619	0.389909	0.375	0.552222
chr1	173893841	173894031	HYPO2043	0.544645	0.220785	0.323861	0.547717	0.575219
chr1	177569950	177571077	HYPO2102	0.622467	0.204762	0.417705	0.408441	0.561538
chr1	177749478	177750127	HYPO2105	0.333333	0	0.333333	0.541667	0.590909
chr1	182232635	182232910	HYPO2161	0.516667	0.137436	0.379231	0.395238	0.341106
chr1	183963643	183964070	HYPO2231	0.596154	0.166667	0.429487	0.675	0.585714
chr1	184185401	184185756	HYPO2241	0.690011	0.246162	0.44385	0.693056	0.553203
chr1	184293839	184294169	HYPO2244	0.641928	0.186127	0.455801	0.468282	0.30378
chr1	187032268	187032485	HYPO2304	0.637531	0.216733	0.420798	0.601551	0.495263
chr1	195027371	195028517	HYPO2425	0.606057	0.246062	0.359995	0.360417	0.561757
chr1	195194394	195194536	HYPO2429	0.679705	0.255612	0.424093	0.311284	0.352477
chr10	5142389	5142529	HYPO2473	0.565741	0.262637	0.303104	0.297619	0.530309
chr10	5264696	5264945	HYPO2475	0.713889	0	0.713889	0.5	0.428571
chr10	5726622	5728787	HYPO2482	0.595529	0.279169	0.31636	0.486148	0.442211
chr10	7554150	7554447	HYPO2518	0.575418	0.208227	0.367191	0.43545	0.650265
chr10	7559390	7559608	HYPO2519	0.5812	0.267514	0.313686	0.212689	0.420519
chr10	9904184	9904723	HYPO2545	0.515406	0.213179	0.302227	0.317573	0.457734
chr10	19514854	19515036	HYPO2655	0.540383	0.195729	0.344655	0.327216	0.406667
chr10	19855481	19855698	HYPO2667	0.556896	0.205728	0.351168	0.330831	0.308267
chr10	19886614	19886951	HYPO2669	0.628521	0.223906	0.404616	0.356525	0.605653
chr10	19939447	19939638	HYPO2672	0.55044	0.217949	0.332491	0.561818	0.484052
chr10	20803144	20803693	HYPO2684	0.591995	0.261583	0.330412	0.631323	0.578418
chr10	22026192	22026538	HYPO2713	0.570952	0.248391	0.322561	0.5	0.3575
chr10	25341241	25341850	HYPO2768	0.532783	0.192255	0.340528	0.322511	0.254763
chr10	26084136	26084621	HYPO2772	0.66155	0.259019	0.402531	0.479293	0.581512
chr10	43427869	43427908	HYPO2940	0.703492	0.276071	0.427421	0.647619	0.462637
chr10	44129931	44130253	HYPO2954	0.665409	0.283642	0.381767	0.460714	0.660658
chr10	59155302	59155504	HYPO3066	0.517749	0.180606	0.337143	0.615476	0.547587
chr10	59328294	59328377	HYPO3069	0.488842	0.138889	0.349953	0.423077	0.283253
chr10	60200888	60201116	HYPO3114	0.665625	0.294444	0.371181	0.630476	0.578846
chr10	60276342	60276679	HYPO3123	0.431945	0.1	0.331944	0.328571	0.437012
chr10	62639802	62640207	HYPO3230	0.721429	0.269444	0.451984	0.45086	0.573469
chr10	67044810	67045149	HYPO3277	0.623993	0.259017	0.364976	0.327231	0.409835
chr10	67048957	67049253	HYPO3278	0.66555	0.311873	0.353677	0.544968	0.698872
chr10	67703206	67703670	HYPO3299	0.693329	0.272386	0.420944	0.567749	0.581372
chr10	67953521	67953767	HYPO3306	0.519156	0.17684	0.342316	0.491667	0.18032
chr10	69750428	69750848	HYPO3346	0.42381	0.120181	0.303628	0.255952	0.254475
chr10	69969734	69969875	HYPO3350	0.613757	0.30541	0.308347	0.447917	0.439286
chr10	74444037	74444248	HYPO3377	0.754708	0.2663	0.488407	0.609281	0.836547
chr10	74608190	74608432	HYPO3384	0.68899	0.25703	0.431959	0.496753	0.507026
chr10	74892177	74892855	HYPO3391	0.610659	0.280211	0.330448	0.717974	0.610442
chr10	77136695	77136902	HYPO3469	0.595139	0.155983	0.439156	0.175325	0.269997
chr10	78879858	78880199	HYPO3519	0.818409	0.309067	0.509342	0.620379	0.759479
chr10	79056891	79057188	HYPO3522	0.362987	0.0560605	0.306926	0.118055	0.286713
chr10	79484963	79485111	HYPO3576	0.8	0.290909	0.509091	0.278078	0.392506
chr10	79924124	79924380	HYPO3631	0.491204	0.170455	0.320749	0.5	0.422917
chr10	80335834	80335868	HYPO3674	0.5	0.160714	0.339286	0.107143	0.5625
chr10	80452364	80452823	HYPO3693	0.56589	0.256109	0.30978	0.371032	0.405427
chr10	80960484	80961237	HYPO3780	0.553772	0.220048	0.333723	0.520729	0.53096
chr10	80961878	80962068	HYPO3781	0.624251	0.279286	0.344965	0.650358	0.677522
chr10	83181645	83181860	HYPO3845	0.616392	0.223088	0.393304	0.588312	0.724418
chr10	83409228	83409667	HYPO3853	0.658155	0.26875	0.389405	0.0545454	0.69369
chr10	84964739	84965424	HYPO3888	0.590278	0.147619	0.442659	0.247619	0.485364
chr10	86396033	86396266	HYPO3916	0.507845	0.191393	0.316452	0.468333	0.421741
chr10	86453481	86453693	HYPO3920	0.567424	0.178619	0.388805	0.526984	0.339621
chr10	87808741	87809353	HYPO3939	0.589337	0.242193	0.347144	0.225781	0.300998
chr10	88175064	88175385	HYPO3947	0.551813	0.239187	0.312627	0.529167	0.644841
chr10	92788286	92788856	HYPO4003	0.561305	0.1975	0.363805	0.103571	0.247156
chr10	92885718	92885997	HYPO4007	0.661607	0.266751	0.394856	0.572365	0.561561
chr10	93077687	93077859	HYPO4020	0.579861	0.166667	0.413194	0.321428	0.49881
chr10	93889037	93889350	HYPO4047	0.365255	0.0607587	0.304496	0.0886243	0.108348
chr10	94380058	94381085	HYPO4061	0.679365	0.320931	0.358434	0.43127	0.618825
chr10	95147860	95148112	HYPO4087	0.431203	0.0926282	0.338575	0.194775	0.196197
chr10	95833532	95833794	HYPO4097	0.60227	0.27109	0.33118	0.606823	0.592291
chr10	96249665	96250056	HYPO4100	0.73927	0.301408	0.437862	0.439983	0.504353
chr10	111433468	111433888	HYPO4225	0.708748	0.276762	0.431986	0.390609	0.806818
chr10	114994028	114994247	HYPO4249	0.514458	0.208974	0.305483	0.411111	0.326364
chr10	115243038	115243461	HYPO4254	0.594262	0.255187	0.339075	0.474895	0.484091
chr10	116264511	116264691	HYPO4272	0.738342	0.245369	0.492973	0.64776	0.538162
chr10	116367701	116368055	HYPO4275	0.525816	0.210304	0.315512	0.394984	0.36208
chr10	116722758	116722967	HYPO4288	0.638258	0.203595	0.434662	0.621321	0.665657
chr10	117310667	117310903	HYPO4306	0.594048	0.239603	0.354445	0.571429	0.433333
chr10	117615820	117616265	HYPO4317	0.533042	0.230753	0.302289	0.363928	0.452969
chr10	118448241	118448355	HYPO4332	0.470895	0.0458333	0.425061	0.338889	0.252966
chr10	120598315	120598598	HYPO4390	0.445422	0.12341	0.322012	0.260169	0.437079
chr10	120700985	120701468	HYPO4393	0.596604	0.235833	0.360771	0.207251	0.230206
chr10	120719588	120719802	HYPO4394	0.724056	0.271212	0.452844	0.467047	0.672795
chr10	122006781	122007092	HYPO4433	0.610873	0.235185	0.375688	0.541667	0.448932
chr10	122237452	122237685	HYPO4437	0.624657	0.302762	0.321896	0.671726	0.664803
chr10	126599720	126600222	HYPO4496	0.551378	0.221162	0.330217	0.341581	0.372255
chr10	126918493	126918645	HYPO4518	0.543358	0.148196	0.395162	0.426234	0.297081
chr10	127871849	127872135	HYPO4568	0.702022	0.29277	0.409253	0.493466	0.605766
chr11	4137276	4137941	HYPO4651	0.631895	0.272714	0.359181	0.562971	0.586982
chr11	5077183	5077438	HYPO4691	0.540091	0.186544	0.353547	0.210921	0.342776
chr11	8457115	8457282	HYPO4765	0.502051	0.116667	0.385385	0.288393	0.275699
chr11	21904682	21905039	HYPO4875	0.666234	0.253973	0.412261	0.314537	0.340623
chr11	21907550	21908439	HYPO4876	0.659464	0.301416	0.358048	0.473849	0.461496
chr11	22791245	22791660	HYPO4893	0.732053	0.155388	0.576666	0.618137	0.654546
chr11	23068598	23068868	HYPO4903	0.656987	0.288446	0.368541	0.495592	0.616124
chr11	23877106	23877407	HYPO4914	0.517647	0.176716	0.340931	0.407323	0.535834
chr11	23999354	23999481	HYPO4918	0.611622	0.245434	0.366187	0.448022	0.244103
chr11	24100329	24100568	HYPO4921	0.509578	0.155506	0.354072	0.469246	0.394538
chr11	26486195	26486712	HYPO4935	0.758547	0.272362	0.486185	0.518254	0.559789
chr11	32959916	32960024	HYPO5008	0.5	0.177976	0.322024	0.726852	0.333341
chr11	35351086	35351260	HYPO5048	0.538095	0.131961	0.406134	0.275	0.257936
chr11	48792994	48793744	HYPO5172_HYPO5597	0.571429	0.0833335	0.488095	NA	NA
chr11	51283934	51284015	HYPO5240	0.41572	0.0736111	0.342108	0.172917	0.153493
chr11	51307903	51308385	HYPO5241	0.532891	0.162202	0.370689	0.157143	0.502441
chr11	52929872	52930794	HYPO5299	0.611746	0.222577	0.389169	0.316667	0.273788
chr11	53365303	53365446	HYPO5317	0.695854	0.202867	0.492988	0.406927	0.620376
chr11	54062629	54062966	HYPO5346	0.586926	0.258333	0.328593	0.571769	0.654596
chr11	55150065	55150303	HYPO5375	0.399708	0.0948718	0.304836	0.28022	0.138281
chr11	57726643	57726813	HYPO5416	0.483333	0.0954545	0.387879	0.160714	0.105907
chr11	58809352	58809792	HYPO5454	0.429252	0.119048	0.310204	0.198413	0.256386
chr11	60929544	60929993	HYPO5532	0.678877	0.249389	0.429487	0.404308	0.506274
chr11	67763025	67763149	HYPO5678	0.740385	0.283273	0.457112	0.430916	0.673599
chr11	67948827	67949040	HYPO5682	0.711966	0.306706	0.40526	0.280202	0.382565
chr11	69305139	69305534	HYPO5753	0.568452	0.257576	0.310876	0.35873	0.438492
chr11	71541777	71542308	HYPO5857	0.597143	0.192002	0.40514	0.449405	0.539526
chr11	72363576	72364092	HYPO5891	0.585925	0.261462	0.324463	0.297768	0.415394
chr11	72776446	72777566	HYPO5901	0.642071	0.269311	0.37276	0.48125	0.382067
chr11	75354614	75355055	HYPO5958	0.567006	0.231731	0.335275	0.426458	0.489683
chr11	77331988	77332254	HYPO6025	0.648589	0.247863	0.400726	0.628307	0.565759
chr11	78836495	78837433	HYPO6106	0.522989	0.131028	0.391961	0.258069	0.23659
chr11	79337200	79338069	HYPO6121	0.62401	0.318165	0.305845	0.529059	0.544477
chr11	83475729	83476097	HYPO6251	0.594546	0.247649	0.346896	0.472594	0.553424
chr11	85653882	85654690	HYPO6313	0.531853	0.210663	0.321189	0.259457	0.319565
chr11	86625393	86625692	HYPO6339	0.518849	0.1875	0.331349	0.5	0.75
chr11	87547368	87548142	HYPO6374	0.540509	0.227103	0.313407	0.367576	0.299115
chr11	87570218	87570658	HYPO6378	0.76114	0.240292	0.520849	0.573978	0.616205
chr11	88486605	88487095	HYPO6425	0.828054	0.362004	0.466051	0.59265	0.521706
chr11	88940427	88940833	HYPO6443	0.691742	0.264253	0.427489	0.510006	0.59237
chr11	90249042	90249254	HYPO6482	0.573077	0.242619	0.330458	0.547959	0.653712
chr11	94274460	94274780	HYPO6518	0.450664	0.147578	0.303085	0.260976	0.250937
chr11	94887312	94887633	HYPO6560	0.777646	0.270833	0.506812	0.648016	0.632733
chr11	95092778	95092822	HYPO6579	0.577778	0.144444	0.433334	0.585859	0.545238
chr11	96206850	96207206	HYPO6668	0.492857	0.128558	0.364299	0.318452	0.165581
chr11	96302986	96303257	HYPO6677	0.531618	0.191836	0.339783	0.215238	0.256667
chr11	96480191	96480382	HYPO6684	0.652668	0.233889	0.418779	0.382576	0.451428
chr11	97003406	97004052	HYPO6727	0.523829	0.094829	0.429	0.319973	0.46452
chr11	99024448	99024882	HYPO6897	0.576337	0.188378	0.387959	0.227381	0.560448
chr11	100488226	100488442	HYPO6952	0.392619	0.065368	0.327251	0	0.241517
chr11	101025326	101025697	HYPO7002	0.620514	0.257581	0.362933	0.454186	0.404446
chr11	101025745	101025941	HYPO7003	0.811667	0.202116	0.60955	0.661667	0.438646
chr11	101026095	101026431	HYPO7004	0.617249	0.287943	0.329307	0.306667	0.498236
chr11	101026750	101026937	HYPO7005	0.612544	0.263117	0.349426	0.486395	0.495663
chr11	101762734	101762906	HYPO7061	0.694545	0.213333	0.481212	0.391369	0.458998
chr11	102290267	102290578	HYPO7106	0.7002	0.199811	0.500389	0.5	0.607155
chr11	102842895	102843059	HYPO7145	0.529286	0.222626	0.30666	0.599744	0.444615
chr11	102854298	102854607	HYPO7148	0.419643	0.0277778	0.391865	0.03125	0.227399
chr11	103125773	103125937	HYPO7170	0.553311	0.215278	0.338033	0.441473	0.40465
chr11	103205882	103206530	HYPO7178	0.602412	0.28862	0.313792	0.226449	0.535724
chr11	103236254	103237069	HYPO7184	0.659127	0.296313	0.362814	0.386642	0.499556
chr11	103462762	103463120	HYPO7187	0.449689	0.14	0.309689	0.271919	0.439722
chr11	103862286	103862998	HYPO7205	0.622443	0.257654	0.364789	0.48067	0.654375
chr11	105808041	105808244	HYPO7253	0.708305	0.270646	0.437659	0.31895	0.444772
chr11	105894464	105895032	HYPO7260	0.517019	0.216897	0.300123	0.167749	0.16164
chr11	106611654	106612863	HYPO7291	0.582817	0.234684	0.348133	0.412341	0.599156
chr11	109292854	109293315	HYPO7363	0.564369	0.253487	0.310882	0.207535	0.428793
chr11	110503948	110504155	HYPO7394	0.674732	0.247485	0.427246	0.51682	0.671821
chr11	112639296	112639913	HYPO7405	0.617262	0.271296	0.345965	0.380952	0.32045
chr11	114088004	114088264	HYPO7448	0.673431	0.241246	0.432185	0.25	0.827976
chr11	114601956	114602185	HYPO7474	0.449109	0.113034	0.336075	0.183333	0.158168
chr11	115092861	115093374	HYPO7509	0.489452	0.154694	0.334758	0.555556	0.437714
chr11	115313316	115313611	HYPO7533	0.574103	0.13566	0.438443	0.429121	0.229306
chr11	115730705	115731012	HYPO7562	0.647533	0.294915	0.352617	0.513293	0.594914
chr11	116126701	116126820	HYPO7589	0.679754	0.180507	0.499247	0.658997	0.544643
chr11	116230966	116231383	HYPO7596	0.50553	0.141464	0.364066	0.362735	0.535833
chr11	116644085	116644580	HYPO7628	0.480101	0.178503	0.301598	0.236111	0.28408
chr11	116898451	116898868	HYPO7647	0.586905	0.24003	0.346875	0.175794	0.256116
chr11	117270740	117270956	HYPO7687	0.715278	0.16553	0.549747	0.508503	0.415365
chr11	117837148	117837901	HYPO7729	0.4067	0.0991666	0.307534	0.254435	0.265129
chr11	118412564	118412960	HYPO7770	0.609524	0.263889	0.345635	0.238095	0.323512
chr11	118854011	118854733	HYPO7795	0.620328	0.295351	0.324977	0.395118	0.518007
chr11	119053171	119053456	HYPO7814	0.586667	0.243889	0.342778	0.19881	0.516737
chr12	8849764	8850026	HYPO8011	0.590894	0.195476	0.395418	0.405087	0.563736
chr12	9057581	9057910	HYPO8022	0.481843	0.11282	0.369023	0.0461538	0.25647
chr12	21214133	21214661	HYPO8151	0.562945	0.243502	0.319444	0.265272	0.337202
chr12	25361782	25361815	HYPO8197	0.575	0.265476	0.309524	0.225	0.475524
chr12	25903392	25903610	HYPO8209	0.662203	0.152778	0.509425	0.552381	0.405632
chr12	26872248	26872525	HYPO8216	0.496591	0.0681817	0.428409	0.230555	0.378314
chr12	32772218	32772532	HYPO8290	0.583895	0.256632	0.327263	0.496712	0.64471
chr12	33719460	33719928	HYPO8308	0.624152	0.26635	0.357802	0.140079	0.232798
chr12	33845444	33845578	HYPO8315	0.574107	0.163095	0.411012	0.107955	0.738553
chr12	36755908	36756394	HYPO8344	0.466667	0.125	0.341667	0.191667	0.309027
chr12	43667457	43667597	HYPO8382	0.686012	0.297073	0.388939	0.625	0.471428
chr12	52988799	52989135	HYPO8415	0.591191	0.25	0.341191	0.464286	0.441333
chr12	53929887	53930378	HYPO8429	0.368193	0.0576777	0.310515	0.223253	0.286875
chr12	55265681	55266008	HYPO8446	0.712799	0.289103	0.423696	0.170759	0.403759
chr12	56099732	56100265	HYPO8474	0.512846	0.165936	0.34691	0.426675	0.449696
chr12	70359030	70359142	HYPO8568	0.803784	0.269131	0.534654	0.594373	0.6681
chr12	70642799	70642929	HYPO8587	0.684356	0.280694	0.403662	0.249206	0.190767
chr12	70647948	70648054	HYPO8588	1	0.125	0.875	NA	NA
chr12	74694201	74694788	HYPO8689	0.637512	0.257452	0.38006	0.401819	0.553129
chr12	74757708	74758087	HYPO8694	0.530782	0.192231	0.33855	0.382578	0.39264
chr12	77587988	77588157	HYPO8747	0.628175	0.286003	0.342172	0.285714	0.410354
chr12	81523107	81523275	HYPO8835	0.895455	0.5	0.395455	0.811429	0.860985
chr12	85340277	85340454	HYPO8905	0.467619	0.142198	0.325421	0.240909	0.258297
chr12	86549830	86550102	HYPO8966	0.486299	0.138492	0.347807	0.135522	0.402315
chr12	86625287	86625498	HYPO8970	0.594091	0.111667	0.482424	0.8	0.311111
chr12	86761885	86762179	HYPO8979	0.485488	0.155428	0.33006	0.3	0.473286
chr12	86809912	86810037	HYPO8986	0.696321	0.269412	0.426909	0.530717	0.591924
chr12	87516480	87517108	HYPO9016	0.473532	0.172065	0.301467	0.102513	0.29869
chr12	87651429	87651679	HYPO9026	0.662732	0.138973	0.523759	0.423809	0.386943
chr12	94326379	94326553	HYPO9130	0.66164	0.222727	0.438913	0.608081	0.590774
chr12	99915609	99915949	HYPO9147	0.578272	0.22206	0.356212	0.368798	0.500993
chr12	100188487	100188606	HYPO9153	0.577902	0.266382	0.31152	0.385317	0.334241
chr12	101305823	101306172	HYPO9174	0.601922	0.241819	0.360102	0.538333	0.450552
chr12	101322120	101322519	HYPO9175	0.431452	0.0977891	0.333663	0.155045	0.0729556
chr12	103530021	103530295	HYPO9213	0.554149	0.19433	0.359819	0.353333	0.154545
chr12	103928473	103928673	HYPO9227	0.643162	0.194234	0.448929	0.453358	0.561557
chr12	106397106	106397388	HYPO9291	0.605131	0.207253	0.397878	0.403052	0.46706
chr12	107175326	107175750	HYPO9322	0.498743	0.195123	0.30362	0.358812	0.53086
chr12	107205054	107205668	HYPO9325	0.605159	0.234377	0.370782	0.334259	0.298466
chr12	109329082	109329191	HYPO9376	0.5996	0.262121	0.337479	0.779167	0.667925
chr12	109479453	109479791	HYPO9380	0.595539	0.213636	0.381903	0.228175	0.34526
chr12	109690566	109690767	HYPO9396	0.579793	0.237078	0.342715	0.434343	0.51936
chr12	110001759	110002022	HYPO9406	0.55439	0.239975	0.314416	0.243333	0.368379
chr12	110312321	110313167	HYPO9417	0.491703	0.110884	0.380818	0.66	0.269716
chr12	110750612	110751404	HYPO9430	0.54237	0.18975	0.352621	0.187963	0.317567
chr12	110779357	110779770	HYPO9432	0.648456	0.342486	0.305969	0.393311	0.392294
chr12	110780404	110780551	HYPO9433	1	0.25	0.75	0.388889	0.328373
chr12	112093110	112093441	HYPO9469	0.710523	0.306916	0.403607	0.752597	0.625384
chr12	113139516	113139820	HYPO9520	0.579445	0.262594	0.316851	0.405835	0.348663
chr12	114152866	114153080	HYPO9580	0.664966	0.141559	0.523407	0.325794	0.278099
chr13	13621340	13621800	HYPO9738	0.47257	0.148471	0.324099	0.280057	0.343147
chr13	24691500	24691724	HYPO9916	0.589841	0.227439	0.362401	0.415105	0.627984
chr13	24877805	24878233	HYPO9925	0.533024	0.230587	0.302437	0.497354	0.299946
chr13	25257663	25257792	HYPO9939	0.647619	0.111111	0.536508	0.490741	0.718723
chr13	28930262	28930740	HYPO9948	0.474246	0.135714	0.338532	0.433803	0.36183
chr13	30071155	30071391	HYPO9957	0.530361	0.217974	0.312387	0.0666667	0.367883
chr13	30134727	30134960	HYPO9961	0.741288	0.27238	0.468908	0.716061	0.59203
chr13	32762466	32762673	HYPO9999	0.507669	0.180127	0.327542	0.284223	0.136364
chr13	37222612	37222782	HYPO10056	0.661835	0.231647	0.430188	0.377569	0.527588
chr13	37893235	37894219	HYPO10078	0.521005	0.205625	0.315379	0.44672	0.447403
chr13	40557920	40558185	HYPO10117	0.656336	0.192929	0.463407	0.498294	0.5365
chr13	41023332	41023755	HYPO10131	0.611738	0.290388	0.321349	0.56627	0.600312
chr13	41064180	41064331	HYPO10132	0.55	0.0972222	0.452778	0.421428	0.163753
chr13	42156532	42156799	HYPO10159	0.536508	0.225397	0.311111	0.444805	0.688509
chr13	42191254	42191385	HYPO10160	0.61526	0.109127	0.506133	0.223333	0.278146
chr13	43345705	43346282	HYPO10195	0.581924	0.266515	0.315408	0.31586	0.495721
chr13	43396377	43396833	HYPO10197	0.463278	0.160446	0.302832	0.278061	0.32408
chr13	43881534	43881992	HYPO10215	0.536765	0.18844	0.348325	0.280203	0.291208
chr13	44353947	44354103	HYPO10222	0.649891	0.172203	0.477688	0.445635	0.556426
chr13	44677376	44677661	HYPO10228	0.549817	0.229273	0.320543	0.208333	0.461826
chr13	45204264	45204628	HYPO10239	0.674026	0.281385	0.392641	0.165168	0.493145
chr13	51342439	51342715	HYPO10346	0.610701	0.275643	0.335058	0.503316	0.66446
chr13	51837949	51838149	HYPO10366	0.683333	0.170238	0.513095	0.605357	0.603641
chr13	51845083	51845477	HYPO10368	0.586016	0.26057	0.325446	0.269898	0.727916
chr13	51863640	51863978	HYPO10369	0.610501	0.281838	0.328663	0.485792	0.618266
chr13	52195744	52195868	HYPO10380	0.640429	0.235745	0.404683	0.42094	0.551765
chr13	52378840	52379085	HYPO10385	0.62643	0.285499	0.340931	0.421428	0.45413
chr13	52692386	52692533	HYPO10392	0.608205	0.259423	0.348782	0.698377	0.688402
chr13	54965465	54965727	HYPO10476	0.398413	0.0674359	0.330977	0.268774	0.283571
chr13	55551173	55551256	HYPO10515	0.656248	0.20662	0.449628	0.69202	0.728679
chr13	58104213	58104573	HYPO10596	0.637236	0.25	0.387236	0.505225	0.486772
chr13	62981182	62981635	HYPO10697	0.430556	0.12963	0.300926	0.158333	0.235208
chr13	63512037	63512773	HYPO10706	0.674997	0.242512	0.432485	0.451933	0.640375
chr13	72298295	72298340	HYPO10828	0.778333	0.255555	0.522778	NA	0.76811
chr13	73606864	73607236	HYPO10859	0.53434	0.214154	0.320186	0.578572	0.360132
chr13	83666976	83667297	HYPO10938	0.491082	0.159777	0.331305	0.443311	0.437871
chr13	98031319	98031606	HYPO11075	1	0.262897	0.737103	0.266667	0.247619
chr13	100709291	100709490	HYPO11149	0.655293	0.204989	0.450305	0.544553	0.567879
chr13	112726294	112727075	HYPO11308	0.438695	0.136322	0.302373	0.242691	0.40834
chr13	114447544	114447682	HYPO11364	0.720455	0.280629	0.439825	0.636508	0.717308
chr14	8826708	8827207	HYPO11468	0.584793	0.2291	0.355693	0.348148	0.267341
chr14	20616242	20616533	HYPO11539	0.669643	0.305026	0.364617	0.338311	0.661045
chr14	27571779	27571975	HYPO11673	0.555244	0.223856	0.331388	0.521772	0.472666
chr14	30827871	30827988	HYPO11712	0.52052	0.216667	0.303853	0.385264	0.373726
chr14	33998190	33998502	HYPO11803	0.737162	0.215224	0.521938	0.528333	0.636427
chr14	53701163	53701785	HYPO12034	0.560134	0.2375	0.322634	0.361905	0.426078
chr14	55111612	55111901	HYPO12057	0.737037	0.243589	0.493447	0.644246	0.502849
chr14	55674060	55674478	HYPO12086	0.588815	0.24418	0.344635	0.551068	0.480832
chr14	61327951	61328594	HYPO12212	0.662945	0.228409	0.434536	0.209066	0.36727
chr14	62794322	62794639	HYPO12252	0.524582	0.213438	0.311144	0.356019	0.206517
chr14	66861641	66862005	HYPO12350	0.571862	0.155357	0.416504	0.254377	0.412686
chr14	70574690	70575223	HYPO12455	0.642857	0.286461	0.356396	0.541559	0.564316
chr14	71174044	71174478	HYPO12485	0.548587	0.245408	0.303179	0.451698	0.529144
chr14	73505437	73505863	HYPO12505	0.643083	0.283727	0.359356	0.339957	0.516513
chr14	74032533	74032749	HYPO12520	0.55915	0.222267	0.336884	0.225187	0.452661
chr14	76958233	76958532	HYPO12563	0.672995	0.286045	0.38695	0.483419	0.412813
chr14	77065638	77065986	HYPO12568	0.660534	0.255459	0.405076	0.682887	0.467349
chr14	77181171	77181634	HYPO12576	0.527424	0.182172	0.345252	0.175758	0.299599
chr14	79667355	79667879	HYPO12601	0.652615	0.309174	0.343441	0.689811	0.582612
chr14	79696309	79697057	HYPO12604	0.613795	0.236637	0.377159	0.402381	0.359567
chr14	79922409	79923330	HYPO12616	0.680025	0.306732	0.373293	0.493621	0.576104
chr14	99272722	99272963	HYPO12649	0.551503	0.217593	0.33391	0.198741	0.205823
chr14	99665122	99665529	HYPO12655	0.690606	0.30605	0.384556	0.571575	0.688896
chr14	100765663	100765867	HYPO12666	0.373455	0.0355392	0.337916	0.117172	0.396457
chr14	103407088	103407533	HYPO12690	0.789285	0.025	0.764285	0.462912	0.490631
chr14	104053004	104053370	HYPO12706	0.546655	0.165879	0.380776	0.321667	0.374269
chr14	115195909	115196816	HYPO12748	0.640693	0.283402	0.357291	0.516071	0.415995
chr14	115345197	115345916	HYPO12752	0.649397	0.30923	0.340167	0.278704	0.562386
chr14	119073815	119074110	HYPO12779	0.72482	0.295328	0.429493	0.645772	0.641632
chr14	119089284	119089732	HYPO12780	0.667792	0.254509	0.413283	0.339423	0.283137
chr14	119233594	119233868	HYPO12787	0.407738	0.0960317	0.311706	0.132143	0.131944
chr14	121765114	121765803	HYPO12825	0.536556	0.137879	0.398677	0.294805	0.349857
chr14	122412674	122413050	HYPO12848	0.734437	0.293671	0.440766	0.521325	0.501494
chr15	7757855	7758148	HYPO12918	0.654121	0.244762	0.409359	0.379167	0.574242
chr15	8796559	8796731	HYPO12935	0.6	0	0.6	0.55	0.232143
chr15	25758276	25758560	HYPO13012	0.60031	0.234751	0.365559	0.366242	0.390869
chr15	25839839	25840307	HYPO13019	0.641994	0.224231	0.417763	0.438744	0.215193
chr15	27447860	27448124	HYPO13029	0.6275	0.270133	0.357367	0.451667	0.508024
chr15	28010999	28011225	HYPO13047	0.557794	0.255269	0.302525	0.43836	0.52381
chr15	31259674	31259942	HYPO13062	0.630989	0.176667	0.454322	0.470139	0.383883
chr15	36674144	36674644	HYPO13125	0.697757	0.275974	0.421783	0.39188	0.479881
chr15	37573693	37574196	HYPO13147	0.544983	0.178175	0.366808	0.302877	0.653699
chr15	37931552	37931749	HYPO13153	0.540956	0.232786	0.30817	0.356667	0.610857
chr15	38496926	38497173	HYPO13172	0.641529	0.129786	0.511743	0.469562	0.564854
chr15	39078001	39078096	HYPO13185	0.686607	0.333333	0.353274	0.425	0.267857
chr15	42269859	42269955	HYPO13210	0.505317	0.0454545	0.459863	0.416666	0.298864
chr15	53144159	53144230	HYPO13253	0.65	0.170833	0.479167	0.375	0.175595
chr15	58003017	58003217	HYPO13297	0.592152	0.257001	0.335152	0.311039	0.479017
chr15	58811595	58812191	HYPO13314	0.533036	0.228472	0.304564	0.451454	0.431245
chr15	63719600	63720260	HYPO13353	0.445079	0.103175	0.341905	0.5	0.485852
chr15	66644097	66644517	HYPO13377	0.568326	0.186451	0.381875	0.330909	0.402727
chr15	72759309	72760009	HYPO13407	0.636702	0.308105	0.328597	0.424956	0.432271
chr15	75920221	75920488	HYPO13528	0.713889	0.298893	0.414995	0.562857	0.359434
chr15	77992795	77993008	HYPO13633	0.791802	0.294444	0.497358	0.40625	0.662739
chr15	78078181	78079292	HYPO13640	0.51505	0.189322	0.325729	0.224314	0.484989
chr15	78156312	78156514	HYPO13642	0.428352	0.105	0.323352	0.25505	0.50774
chr15	78369950	78370072	HYPO13653	0.822222	0.204762	0.61746	0.333333	0.503077
chr15	78427476	78428566	HYPO13660	0.644789	0.251218	0.393571	0.438273	0.590185
chr15	78753960	78754255	HYPO13686	0.541667	0.215245	0.326422	0.333968	0.501798
chr15	79039419	79039580	HYPO13710	0.441998	0.133333	0.308665	0.402778	0.292308
chr15	80361705	80361886	HYPO13801	0.596721	0.272035	0.324686	0.465212	0.7169
chr15	80402401	80403121	HYPO13804	0.639942	0.32228	0.317662	0.336016	0.465529
chr15	81917494	81918110	HYPO13864_HYPO14817	0.353042	0.0185185	0.334523	0.177778	0.120901
chr15	82839536	82839817	HYPO13904	0.55161	0.238208	0.313402	0.429981	0.321641
chr15	83360650	83360965	HYPO13933	0.554082	0.238328	0.315754	0.429629	0.42227
chr15	83909380	83909470	HYPO13961	0.787145	0.339376	0.447769	0.518855	0.630097
chr15	84066248	84066386	HYPO13970	0.629869	0.204327	0.425542	0.209048	0.451405
chr15	84136464	84136562	HYPO13972	0.613468	0.144841	0.468627	1	0.690741
chr15	84343315	84343610	HYPO13981	0.4375	0.108442	0.329058	0	0.306471
chr15	84795355	84795622	HYPO14000	0.587738	0.261508	0.32623	0.509028	0.610861
chr15	86175315	86175503	HYPO14067	0.727879	0.215238	0.512641	0.532179	0.632293
chr15	88961566	88962093	HYPO14111	0.664621	0.301977	0.362644	0.653515	0.55469
chr15	90499793	90500262	HYPO14140	0.625828	0.290288	0.33554	0.461105	0.568428
chr15	96486031	96486265	HYPO14227	0.587482	0.267546	0.319936	0.434091	0.476026
chr15	97192037	97192274	HYPO14243	0.551786	0.153846	0.39794	0.40601	0.513691
chr15	97331906	97332285	HYPO14248	0.564586	0.162679	0.401907	0.286593	0.330911
chr15	98960802	98961005	HYPO14358	0.677215	0.258928	0.418287	0.448412	0.37402
chr15	99064313	99064468	HYPO14360	0.54478	0.131876	0.412904	0.60496	0.267061
chr15	99547764	99548577	HYPO14394	0.613078	0.217849	0.395229	0.39375	0.381313
chr15	100499425	100499903	HYPO14439	0.734762	0.33443	0.400332	0.690472	0.739271
chr15	100883818	100884626	HYPO14464_HYPO15462_HYPO15463	0.582035	0.190965	0.39107	0.319246	0.316533
chr15	101088265	101089002	HYPO14487	0.619048	0.297159	0.321889	0.621758	0.65873
chr15	101198169	101198646	HYPO14499	0.532576	0.162963	0.369613	0.476667	0.50368
chr15	102775688	102776295	HYPO14591	0.549469	0.21964	0.329829	0.287496	0.162178
chr15	102965004	102965739	HYPO14618	0.525397	0.198889	0.326508	0.207143	0.236364
chr16	8997991	8998306	HYPO14740	0.534372	0.187302	0.347071	0.469372	0.433333
chr16	10969252	10969767	HYPO14767	0.635406	0.248638	0.386767	0.395747	0.54865
chr16	17734305	17734358	HYPO14864	0.726667	0.270346	0.45632	NA	0.41875
chr16	18220118	18220248	HYPO14892	0.57	0.216623	0.353377	0.234921	0.346659
chr16	18387651	18388115	HYPO14900	0.444445	0	0.444445	NA	0.325
chr16	18776080	18776237	HYPO14923	0.539881	0.216768	0.323113	0.438182	0.28
chr16	22432130	22432365	HYPO14991	0.808832	0.284767	0.524066	0.431603	0.82
chr16	22444780	22445038	HYPO14993	0.706044	0.303902	0.402142	0.25947	0.518957
chr16	22466547	22466764	HYPO14994	0.71426	0.222489	0.491771	0.379293	0.621192
chr16	22890943	22891211	HYPO15003	0.610898	0.275995	0.334903	0.340476	0.620914
chr16	23144154	23144781	HYPO15011	0.545486	0.219218	0.326269	0.32969	0.505763
chr16	23262314	23262909	HYPO15015_HYPO16026	0.463676	0.15	0.313675	0.05	0.274475
chr16	23284436	23284761	HYPO15018	0.582727	0.1875	0.395227	0.587088	0.714404
chr16	28911659	28911950	HYPO15071	0.676555	0.323442	0.353113	0.37623	0.451664
chr16	30155278	30155536	HYPO15100	0.468089	0.163496	0.304593	0.325	0.144463
chr16	30234260	30234466	HYPO15105	0.709849	0.255088	0.454761	0.354401	0.598834
chr16	32520406	32521025	HYPO15197	0.594631	0.275843	0.318788	0.348801	0.53718
chr16	34120942	34121288	HYPO15249	0.466107	0.144797	0.32131	0.329557	0.400157
chr16	35742517	35742757	HYPO15278	0.659188	0.244742	0.414446	0.15	0.607341
chr16	36505793	36506600	HYPO15287	0.56184	0.240443	0.321397	0.277365	0.340075
chr16	36665874	36666270	HYPO15290	0.72981	0.330262	0.399548	0.61339	0.544958
chr16	42784877	42785269	HYPO15361	0.45477	0.135764	0.319006	0.127778	0.28961
chr16	50839834	50840164	HYPO15440	0.608145	0.288785	0.31936	0.316071	0.547775
chr16	58498536	58499026	HYPO15487	0.623218	0.297277	0.325941	0.446296	0.419276
chr16	59517413	59517607	HYPO15496	0.581722	0.27252	0.309203	0.442857	0.605435
chr16	76053819	76054155	HYPO15548	0.725529	0.292544	0.432985	0.604582	0.814003
chr16	76365840	76366316	HYPO15554	0.533149	0.224257	0.308892	0.366667	0.365013
chr16	78540692	78540995	HYPO15581	0.667109	0.327203	0.339906	0.617819	0.522238
chr16	78546772	78547061	HYPO15582	0.932723	0.294697	0.638026	0.677922	0.928788
chr16	84583739	84583892	HYPO15591	0.594884	0.179286	0.415598	0.453247	0.578645
chr16	84584082	84584717	HYPO15592	0.64707	0.335337	0.311732	0.76286	0.622748
chr16	87654382	87654654	HYPO15626	0.513765	0.1325	0.381265	0.199242	0.224848
chr16	89817150	89817573	HYPO15642	0.487338	0.164114	0.323224	0.282323	0.331385
chr16	90044259	90044423	HYPO15650	0.62983	0.213471	0.416359	0.487181	0.588727
chr16	92825891	92826179	HYPO15764	0.789766	0.294345	0.495421	0.630194	0.66262
chr16	92904199	92904570	HYPO15766	0.483168	0.168254	0.314914	0.215368	0.350732
chr16	93574835	93575029	HYPO15781	0.546009	0.189718	0.356291	0.384529	0.246354
chr16	93586143	93586906	HYPO15783	0.797157	0.26623	0.530927	0.544064	0.71226
chr16	93787252	93787415	HYPO15790	0.526655	0.180736	0.345919	0.466331	0.504321
chr16	93810345	93810593	HYPO15792	0.576001	0.241944	0.334057	0.49381	0.457823
chr16	95623418	95623658	HYPO15843	0.542057	0.239634	0.302423	0.392118	0.593262
chr16	95676379	95677039	HYPO15848	0.522243	0.206406	0.315837	0.456998	0.364427
chr16	96151372	96151735	HYPO15863	0.631667	0.230087	0.40158	0.504487	0.39623
chr16	96494659	96495227	HYPO15877	0.587235	0.277217	0.310018	0.41506	0.471451
chr16	96513613	96513793	HYPO15879	0.523295	0.218182	0.305113	0.388889	0.626244
chr16	96594096	96594528	HYPO15884	0.523732	0.192332	0.3314	0.347294	0.502089
chr17	3379767	3379950	HYPO15920	0.625714	0.319444	0.30627	0.329167	0.236111
chr17	4276735	4277286	HYPO15925	0.609602	0.227058	0.382544	0.416125	0.621991
chr17	5303375	5303783	HYPO15941	0.637429	0.226827	0.410602	0.49076	0.512889
chr17	6514863	6515287	HYPO15982	1	0.342857	0.657143	0.626667	0.685185
chr17	6948183	6948495	HYPO15985	0.538084	0.210922	0.327162	0.260577	0.272817
chr17	8192231	8192383	HYPO16019	0.504365	0.172078	0.332287	0.541667	0.275553
chr17	8224570	8225238	HYPO16020	0.53	0.166667	0.363333	0.388889	0.369048
chr17	8228541	8228711	HYPO16021	0.4	0	0.4	0.583333	NA
chr17	8285959	8286363	HYPO16023	0.75	0.283333	0.466667	0.5	0.875
chr17	8309300	8309831	HYPO16025_HYPO17095	0.390649	0.0826839	0.307965	0.466667	0.184294
chr17	8833614	8833877	HYPO16049	0.606403	0.216696	0.389707	0.267676	0.507574
chr17	10618310	10618687	HYPO16068	0.58313	0.256378	0.326752	0.553601	0.604861
chr17	12500683	12500921	HYPO16084	0.573174	0.144973	0.428201	0.421433	0.540082
chr17	13235389	13235800	HYPO16107	0.5	0.125	0.375	NA	0.38836
chr17	15509119	15509214	HYPO16138	0.688889	0.32619	0.362698	0.8	0.248809
chr17	24167703	24167824	HYPO16250	0.732514	0.238636	0.493878	0.137755	0.517308
chr17	24644044	24644125	HYPO16272	0.55	0.138889	0.411111	0.448809	0.395833
chr17	25347513	25348159	HYPO16309	0.57499	0.265609	0.309381	0.585784	0.566787
chr17	25384874	25385295	HYPO16312	0.507643	0.163105	0.344537	0.489394	0.563352
chr17	27395854	27396441	HYPO16428	0.607639	0.292538	0.315101	0.25	0.526726
chr17	28233428	28233605	HYPO16466	0.622145	0.311152	0.310993	0.443853	0.459957
chr17	28383759	28383897	HYPO16479	0.626278	0.215687	0.410591	0.469017	0.514585
chr17	29498751	29499160	HYPO16556	0.597778	0.17	0.427778	0.225	0.465338
chr17	29502110	29502463	HYPO16557	0.525874	0.194769	0.331105	0.0416667	0.537464
chr17	30116949	30117112	HYPO16595	0.421826	0.107738	0.314087	0.4	0.369927
chr17	30472835	30473297	HYPO16597	0.588185	0.206731	0.381454	0.281848	0.485978
chr17	30763756	30764006	HYPO16601_HYPO17711	0.6	0	0.6	NA	0.166667
chr17	34273667	34273776	HYPO16735	0.760096	0.0944445	0.665652	0.356799	0.738553
chr17	34809537	34809612	HYPO16774	0.582334	0.250777	0.331558	0.344988	0.287747
chr17	34824843	34824968	HYPO16779	0.510985	0	0.510985	0.316667	0.473214
chr17	35161945	35162126	HYPO16801	0.616667	0.180952	0.435715	0.35	0.448296
chr17	35355368	35355857	HYPO16822	0.570929	0.251299	0.31963	0.463435	0.496297
chr17	40958467	40958658	HYPO16959	0.564863	0.219634	0.34523	0.47629	0.462056
chr17	45472074	45472196	HYPO17022	0.803704	0.311508	0.492196	0.589683	0.662698
chr17	45514019	45514481	HYPO17024	0.432619	0.113809	0.31881	0.21	0.212888
chr17	46759463	46759581	HYPO17110	0.616667	0.250673	0.365993	0.6875	0.568071
chr17	47576180	47576738	HYPO17150	0.490019	0.155754	0.334265	0.211309	0.387796
chr17	47693809	47694499	HYPO17162	0.785062	0.272492	0.51257	0.728572	0.666026
chr17	47896690	47896905	HYPO17176	0.584722	0.284524	0.300198	0.433157	0.501765
chr17	57333254	57333711	HYPO17356	0.64618	0.287404	0.358776	0.533353	0.574923
chr17	57417923	57419758	HYPO17362	0.570265	0.259752	0.310512	0.393057	0.447848
chr17	64557755	64557999	HYPO17389	0.748214	0.262996	0.485218	0.544973	0.599311
chr17	64929193	64929375	HYPO17394	0.639451	0.250763	0.388688	0.392531	0.426714
chr17	67060262	67060405	HYPO17430	0.618611	0.26	0.358611	0.475	0.464986
chr17	67543520	67543721	HYPO17432	0.5688	0.190151	0.378649	0.278697	0.353738
chr17	68238859	68239033	HYPO17441	0.56841	0.17996	0.38845	0.328441	0.450476
chr17	78486332	78486660	HYPO17556	0.657471	0.187729	0.469742	0.46442	0.61853
chr17	79630290	79630474	HYPO17578	0.613219	0.258408	0.354811	0.497475	0.491799
chr17	80316517	80316642	HYPO17585	0.651314	0.197619	0.453694	0.415556	0.522101
chr17	80364070	80364670	HYPO17586	0.589365	0.23684	0.352525	0.427195	0.579303
chr17	81161865	81162036	HYPO17613	0.745192	0.224387	0.520806	0.520079	0.545151
chr17	81171787	81172407	HYPO17615	0.679416	0.254602	0.424814	0.414563	0.531933
chr17	84515332	84516399	HYPO17679	0.490955	0.183751	0.307204	0.327898	0.38769
chr17	84544890	84545782	HYPO17681	0.424462	0.107072	0.31739	0.135185	0.26963
chr17	84576842	84577127	HYPO17684	0.641737	0.310293	0.331444	0.269841	0.380582
chr17	84940077	84940169	HYPO17689	0.662554	0.314047	0.348507	0.402146	0.390367
chr17	86607496	86607728	HYPO17722	0.728281	0.246572	0.481709	0.421232	0.605454
chr17	87345329	87345546	HYPO17740	0.468254	0.143939	0.324315	0.416667	0.268588
chr17	87726467	87726878	HYPO17754	0.542817	0.242195	0.300622	0.359375	0.42197
chr18	4295070	4296197	HYPO17817	0.507126	0.165205	0.341921	0.306734	0.303704
chr18	22537164	22537326	HYPO17963	0.480577	0.178415	0.302162	0.336903	0.346853
chr18	31992826	31992865	HYPO18042	1	0.333333	0.666667	0.75	0.617761
chr18	33130010	33130125	HYPO18067	0.582897	0.200256	0.38264	0.452308	0.519368
chr18	38224194	38224593	HYPO18264	0.641827	0.33	0.311827	0.5125	0.415
chr18	38860609	38860926	HYPO18314	0.641775	0.247531	0.394244	0.194797	0.348052
chr18	39065836	39066164	HYPO18320	0.50119	0.177778	0.323413	NA	0.06
chr18	55066419	55067183	HYPO18475	0.580889	0.274552	0.306337	0.212949	0.41505
chr18	55133256	55133313	HYPO18478	0.557612	0.11158	0.446032	0.0614719	0.290705
chr18	58604467	58604557	HYPO18526	0.461244	0.124848	0.336395	0.291538	0.519192
chr18	61193270	61193628	HYPO18574	0.553175	0.189815	0.36336	0.264286	0.473062
chr18	61621649	61621955	HYPO18592	0.527576	0.177778	0.349798	0	0.280736
chr18	62336407	62336958	HYPO18619	0.65238	0.347739	0.304641	0.402933	0.430838
chr18	62348224	62348940	HYPO18621	0.574598	0.223186	0.351412	0.37868	0.380046
chr18	65090926	65091164	HYPO18657	0.501975	0.191533	0.310443	0.291453	0.306057
chr18	65961765	65962377	HYPO18680	0.643931	0.293496	0.350435	0.453283	0.597144
chr18	66589308	66589622	HYPO18696	0.388889	0.065	0.323889	0	0.216667
chr18	67528465	67528643	HYPO18723	0.667064	0.157407	0.509656	0.3	0.460476
chr18	68378035	68378355	HYPO18743	0.603333	0.228578	0.374755	0.3	0.238214
chr18	68678739	68678844	HYPO18750	0.666667	0.166667	0.499999	0.19	0.340476
chr18	70681924	70682236	HYPO18780	0.608227	0.25491	0.353317	0.233333	0.391243
chr18	74031996	74032242	HYPO18799	0.48842	0.170118	0.318302	0.269047	0.318332
chr18	75039710	75039895	HYPO18822	0.4988	0.161201	0.337599	0.370578	0.466716
chr18	75105460	75105511	HYPO18824	0.741071	0.130555	0.610516	0.614583	0.807015
chr18	75354336	75354548	HYPO18834	0.482751	0.137617	0.345133	0.489322	0.584716
chr18	75446299	75446416	HYPO18838	0.666407	0.293048	0.373359	0.850926	0.602513
chr18	75464736	75465102	HYPO18839	0.683333	0.265484	0.417849	0.264881	0.408025
chr18	75665637	75665802	HYPO18858	0.8	0.141667	0.658333	0.267677	0.199134
chr18	75738131	75738433	HYPO18859	0.557684	0.181538	0.376145	0.249444	0.167079
chr18	76055349	76055934	HYPO18872	0.611207	0.23001	0.381197	0.397277	0.571074
chr18	76243780	76244281	HYPO18878	0.589683	0.235	0.354683	0.107143	0.271968
chr18	81768454	81768636	HYPO18985	0.642421	0.314242	0.328178	0.5125	0.535054
chr19	3855326	3855966	HYPO19103	0.628598	0.277633	0.350965	0.3125	0.159967
chr19	4184888	4185647	HYPO19132	0.560152	0.231346	0.328806	0.320441	0.439871
chr19	4203760	4204257	HYPO19136	0.509425	0.153082	0.356343	0.402678	0.43927
chr19	4218385	4218516	HYPO19138	0.663159	0.287612	0.375547	0.303086	0.568454
chr19	6530417	6530526	HYPO19307	0.541667	0.133333	0.408333	NA	0.233929
chr19	7092616	7093510	HYPO19332	0.601949	0.256694	0.345255	0.411012	0.564609
chr19	8094147	8094442	HYPO19359	0.799484	0.308608	0.490876	0.72964	0.853156
chr19	8646237	8646527	HYPO19363	0.580808	0.088955	0.491853	0.204365	0.189881
chr19	10875715	10875890	HYPO19462	0.363203	0	0.363203	0.274603	0.424142
chr19	11122506	11122908	HYPO19477	0.584927	0.278315	0.306611	0.249903	0.559127
chr19	15556182	15556399	HYPO19516	0.555556	0.24302	0.312535	0.308728	0.501501
chr19	24601295	24602090	HYPO19616	0.647545	0.32439	0.323155	0.495653	0.581832
chr19	25127089	25127458	HYPO19630	0.75467	0.325144	0.429526	0.610293	0.742933
chr19	29302907	29303394	HYPO19686	0.583243	0.275855	0.307389	0.370257	0.52963
chr19	33176050	33176684	HYPO19758	0.605755	0.238801	0.366954	0.478629	0.746237
chr19	36424808	36424947	HYPO19793	0.685104	0.255325	0.429779	0.185714	0.568158
chr19	41708529	41708822	HYPO19902	0.610052	0.309472	0.300579	0.490224	0.630979
chr19	43101899	43102294	HYPO19969	0.525253	0.214924	0.310329	0.233333	0.325666
chr19	44665662	44665864	HYPO20028	0.730586	0.278254	0.452332	0.486085	0.606904
chr19	45185147	45185482	HYPO20082	0.637581	0.30472	0.332861	0.581423	0.646208
chr19	45917951	45918293	HYPO20125	0.676537	0.27888	0.397657	0.561316	0.631319
chr19	47417653	47418387	HYPO20202_HYPO21540_HYPO21541	0.458048	0.138724	0.319324	0.260936	0.164971
chr19	47523031	47524289	HYPO20207	0.677735	0.13909	0.538645	0.323565	0.42303
chr19	56605065	56605321	HYPO20325	0.671513	0.33663	0.334882	0.368189	0.637497
chr19	57517502	57517935	HYPO20370	0.663369	0.209598	0.453772	0.503184	0.683923
chr2	5404405	5404508	HYPO20482	0.585	0.20085	0.38415	0.417532	0.238652
chr2	5563696	5564079	HYPO20485	0.509524	0.188628	0.320896	0.375	0.348247
chr2	9919222	9919414	HYPO20523	0.664685	0.251154	0.413531	0.436508	0.765168
chr2	11161008	11161124	HYPO20543	0.623077	0.260699	0.362378	0.35	0.777665
chr2	18860596	18860955	HYPO20614	0.492951	0.167542	0.325409	0.172423	0.362001
chr2	20215145	20215206	HYPO20635	0.615079	0.240909	0.374171	0.411667	0.564872
chr2	24603447	24603637	HYPO20682	0.601363	0.207148	0.394215	0.545707	0.504724
chr2	25702202	25702268	HYPO20734	0.546795	0.114286	0.432509	0.442761	0.412902
chr2	27583858	27584240	HYPO20806	0.495984	0.150842	0.345142	0.187153	0.432336
chr2	29594799	29594894	HYPO20886	0.65035	0.0748106	0.575539	0.51875	0.586607
chr2	30479497	30479605	HYPO20936	0.653169	0.280724	0.372445	0.611111	0.455556
chr2	30992042	30992140	HYPO20979	0.34965	0	0.34965	0.0714285	0.151515
chr2	31688660	31688879	HYPO21009	0.638848	0.32935	0.309498	0.494949	0.645154
chr2	31709937	31710315	HYPO21012	0.502522	0.198175	0.304347	0.232143	0.129305
chr2	31936777	31937119	HYPO21022	0.639941	0.295987	0.343954	0.504966	0.698184
chr2	31976632	31976683	HYPO21026	0.576445	0.246296	0.330149	0.262115	0.590126
chr2	35588238	35588446	HYPO21197	0.758333	0.28303	0.475303	0.60253	0.656526
chr2	43594273	43594634	HYPO21279	0.554601	0.210657	0.343945	0.542088	0.608397
chr2	44660192	44660305	HYPO21282	0.763445	0.216364	0.547082	0.614286	0.828571
chr2	45715265	45715724	HYPO21291	0.600563	0.17577	0.424793	0.388186	0.547222
chr2	49426165	49426386	HYPO21302	0.615741	0.288889	0.326852	0.487678	0.470943
chr2	51493351	51493636	HYPO21317	0.628307	0.267929	0.360378	0.492088	0.629798
chr2	52369799	52369880	HYPO21327	0.592857	0.133929	0.458929	0.212798	0.488656
chr2	59331645	59332022	HYPO21379	0.52415	0.214737	0.309413	0.302742	0.488996
chr2	60460138	60460581	HYPO21400	0.583363	0.212317	0.371046	0.457143	0.646215
chr2	60761187	60761476	HYPO21408	0.615861	0.233117	0.382744	0.272381	0.466984
chr2	61352088	61352323	HYPO21415	0.59453	0.181002	0.413528	0.457381	0.615126
chr2	61826455	61826531	HYPO21423	0.55627	0.25	0.30627	0.295833	0.366061
chr2	65031322	65031774	HYPO21443	0.520124	0.173059	0.347065	0.322448	0.304912
chr2	69966580	69966897	HYPO21506	0.383597	0.05625	0.327347	0.2125	0.273539
chr2	72244790	72244914	HYPO21567	0.675605	0.264762	0.410843	0.491935	0.637666
chr2	72712025	72712448	HYPO21577	0.669475	0.308235	0.36124	0.591352	0.641447
chr2	73291658	73292014	HYPO21593	0.630769	0.252224	0.378546	0.618506	0.361346
chr2	73809152	73809200	HYPO21615	0.583333	0.266402	0.316931	0.5875	0.388889
chr2	74538064	74538339	HYPO21630	0.681481	0.310012	0.371469	0.4	0.371266
chr2	84266553	84266795	HYPO21746	0.69135	0.25814	0.433209	0.622863	0.381502
chr2	84770505	84771062	HYPO21777	0.62865	0.26794	0.36071	0.670857	0.705166
chr2	84892500	84892573	HYPO21785	0.541667	0.222222	0.319445	0.665476	0.410457
chr2	90492412	90492635	HYPO21802	0.483796	0.176124	0.307672	0.416667	0.613492
chr2	90882753	90883320	HYPO21814	0.613894	0.27684	0.337054	0.549908	0.508419
chr2	93001917	93002241	HYPO21897	0.642857	0.2	0.442857	0.383929	0.749444
chr2	103774553	103775025	HYPO22002	0.719475	0.299748	0.419727	0.492063	0.617619
chr2	116758027	116758317	HYPO22132	0.625913	0.267424	0.358489	0.323148	0.284616
chr2	118380160	118380540	HYPO22165	0.503219	0.173384	0.329835	0.187009	0.275516
chr2	119162350	119162530	HYPO22218	0.602041	0.253143	0.348897	0.2	0.230132
chr2	121132321	121132886	HYPO22268_HYPO23726	0.452919	0.147143	0.305777	0.438272	0.326999
chr2	127163623	127163940	HYPO22369	0.480159	0.151604	0.328554	0.245971	0.405971
chr2	127164143	127164799	HYPO22370	0.770412	0.32963	0.440783	0.607407	0.812879
chr2	127742290	127742833	HYPO22393	0.607723	0.178252	0.429471	0.422923	0.310311
chr2	128120794	128121120	HYPO22403	0.714208	0.28145	0.432758	0.489188	0.644329
chr2	130997156	130997822	HYPO22489	0.525759	0.222501	0.303258	0.334417	0.368876
chr2	144100739	144101369	HYPO22622	0.614286	0.269184	0.345101	0.402778	0.267712
chr2	150395717	150396023	HYPO22714	0.648094	0.283297	0.364797	0.302828	0.541952
chr2	151431415	151431715	HYPO22732	0.472222	0.118506	0.353716	0.255456	0.285414
chr2	152877474	152877727	HYPO22818	0.653846	0.201025	0.452821	0.54	0.413339
chr2	153337790	153338056	HYPO22840	0.640606	0.223457	0.417149	0.335714	0.462738
chr2	154817287	154817421	HYPO22877	0.666079	0.272619	0.39346	0.313828	0.371168
chr2	155456282	155456541	HYPO22902	0.618374	0.303548	0.314826	0.446164	0.495065
chr2	156348847	156348993	HYPO22932	0.775674	0.274969	0.500704	0.449375	0.786832
chr2	156708247	156708601	HYPO22954	0.528744	0.161819	0.366925	0.302997	0.527387
chr2	156955067	156955743	HYPO22963	0.543506	0.209311	0.334195	0.443271	0.493113
chr2	157313755	157313863	HYPO22977	0.486111	0.125	0.361111	0.125	0.335697
chr2	158708486	158708596	HYPO23046	0.485874	0.143651	0.342223	0.276364	0.280932
chr2	158782748	158782907	HYPO23051	0.512426	0.190724	0.321701	0.298363	0.141146
chr2	163054804	163055175	HYPO23113	0.626334	0.252415	0.373919	0.617519	0.5331
chr2	163057744	163058326	HYPO23114	0.61282	0.274037	0.338784	0.367138	0.517275
chr2	163570603	163571266	HYPO23146	0.674936	0.312678	0.362258	0.451279	0.679197
chr2	163909950	163910294	HYPO23161	0.679478	0.292592	0.386886	0.603307	0.747155
chr2	164384771	164385263	HYPO23187	0.464165	0.0948806	0.369285	0.223319	0.376272
chr2	165293704	165293922	HYPO23272	0.586667	0.282751	0.303916	0.2	0.357821
chr2	165777050	165777196	HYPO23296	0.575842	0.1846	0.391242	0.369643	0.345567
chr2	166185250	166185749	HYPO23317	0.670476	0.282487	0.387989	0.598141	0.443772
chr2	166455808	166456644	HYPO23331	0.665472	0.285614	0.379858	0.382231	0.442627
chr2	166571213	166571657	HYPO23338	0.633785	0.229101	0.404685	0.556944	0.492194
chr2	167482161	167482558	HYPO23386	0.520428	0.198034	0.322394	0.25496	0.378933
chr2	167512419	167512642	HYPO23391	0.598986	0.168809	0.430177	0.2625	0.597778
chr2	167548760	167549586	HYPO23395	0.641367	0.186704	0.454663	0.557323	0.727162
chr2	167630350	167631335	HYPO23401	0.652556	0.283048	0.369508	0.422982	0.391779
chr2	167656627	167656837	HYPO23403	0.697619	0.226073	0.471547	0.455885	0.341985
chr2	167735490	167735842	HYPO23413	0.619422	0.191264	0.428158	0.408333	0.58597
chr2	167944661	167944978	HYPO23428	0.625813	0.283574	0.342239	0.294165	0.576161
chr2	168365246	168365578	HYPO23456	0.561332	0.226894	0.334438	0.249621	0.524292
chr2	170161768	170161987	HYPO23530	0.617058	0.291051	0.326007	0.486054	0.392672
chr2	172473360	172474000	HYPO23590	0.508838	0.182697	0.326141	0.326314	0.370983
chr2	172886991	172887607	HYPO23616	0.549967	0.24893	0.301036	0.376923	0.624547
chr2	173090155	173090498	HYPO23632	0.612052	0.264871	0.347181	0.42247	0.38787
chr2	173174932	173175202	HYPO23636	0.780859	0.174545	0.606313	0.272222	0.540324
chr2	173360195	173360394	HYPO23642	0.683064	0.242778	0.440286	0.256667	0.44544
chr2	173622066	173622210	HYPO23649	0.64329	0.269743	0.373547	0.349091	0.476987
chr2	174152772	174152996	HYPO23668	0.554942	0.237586	0.317356	0.600655	0.388279
chr2	180785673	180785871	HYPO23798	0.457828	0.111905	0.345924	0.253182	0.291944
chr3	8669551	8669953	HYPO23856	0.560798	0.198573	0.362226	0.397232	0.429432
chr3	8718310	8718609	HYPO23859	0.663481	0.211111	0.45237	0.30381	0.292135
chr3	8857223	8857264	HYPO23861	0.5375	0.123214	0.414286	0.27	0.166666
chr3	9402870	9403446	HYPO23879	0.532152	0.186963	0.345189	0.129924	0.371039
chr3	10134530	10134613	HYPO23899	0.666372	0.225476	0.440896	0.507692	0.660684
chr3	27361881	27362018	HYPO23968	0.834524	0.25	0.584524	0.629932	0.60235
chr3	30959848	30960064	HYPO24011	0.641378	0.279945	0.361433	0.36006	0.574693
chr3	35217256	35217478	HYPO24068	0.756097	0.275199	0.480898	0.367619	0.599524
chr3	35631300	35631630	HYPO24078	0.708735	0.269627	0.439108	0.571429	0.772976
chr3	38571019	38571204	HYPO24144	0.716518	0.3	0.416518	0.580952	0.453621
chr3	50387404	50387668	HYPO24184	0.587273	0.279395	0.307877	0.384499	0.408571
chr3	51115688	51115924	HYPO24196	0.634269	0.25399	0.380279	0.39949	0.364859
chr3	51602212	51602645	HYPO24224	0.638889	0.105555	0.533334	NA	0.311111
chr3	52438376	52438667	HYPO24250	0.502976	0.191408	0.311568	0.174444	0.221643
chr3	57415704	57415977	HYPO24315	0.483225	0.177399	0.305826	0.413571	0.383388
chr3	58923867	58924350	HYPO24346	0.759391	0.326983	0.432407	0.435981	0.707309
chr3	65467177	65467399	HYPO24390	0.592745	0.21455	0.378195	0.392934	0.606558
chr3	68593305	68593615	HYPO24438	0.53053	0.198219	0.332311	0.433983	0.311259
chr3	69363608	69364064	HYPO24452	0.569079	0.240981	0.328098	0.292063	0.350319
chr3	78765313	78765424	HYPO24474	0.606452	0.274332	0.332121	0.369647	0.370916
chr3	86647258	86647304	HYPO24587	0.541667	0.09	0.451667	0.875	0.257491
chr3	88259169	88259453	HYPO24669	0.475758	0.09375	0.382008	0.2	0.274787
chr3	89035328	89035624	HYPO24716	0.548871	0.22123	0.327641	0.633333	0.559388
chr3	89047488	89047800	HYPO24717	0.556457	0.215699	0.340759	0.351558	0.2808
chr3	89183730	89184020	HYPO24734	0.617172	0.31243	0.304741	0.502778	0.544644
chr3	89396156	89396972	HYPO24746	0.580966	0.267482	0.313484	0.39933	0.434368
chr3	94945491	94945769	HYPO24840	0.690992	0.366209	0.324783	0.672478	0.746667
chr3	94977007	94977063	HYPO24843	0.473333	0.127976	0.345357	0.3	0.328962
chr3	100240690	100240965	HYPO25030	0.640752	0.28038	0.360372	0.735714	0.568652
chr3	108743099	108743228	HYPO25234	0.567857	0.233163	0.334694	0.70873	0.381777
chr3	115392327	115392613	HYPO25261	0.46732	0.12356	0.34376	0.167557	0.273358
chr3	116143142	116143378	HYPO25280	0.621429	0.251498	0.369931	0.213333	0.530256
chr3	116168686	116168822	HYPO25281	0.61336	0.290972	0.322387	0.441865	0.684421
chr3	121067995	121068231	HYPO25317	0.623873	0.231818	0.392054	0.349112	0.440496
chr3	121186789	121186981	HYPO25321	0.505633	0.189899	0.315734	0.318452	0.200603
chr3	121424811	121425010	HYPO25329	0.714082	0.238574	0.475508	0.358297	0.358413
chr3	121905250	121905352	HYPO25342	0.576572	0.0801281	0.496443	0.346154	0.397321
chr3	123143568	123144026	HYPO25369	0.709858	0.228813	0.481046	0.521103	0.652765
chr3	127462257	127462465	HYPO25401	0.353383	0.0336134	0.31977	0.124074	0.101232
chr3	128989471	128989893	HYPO25421	0.563243	0.241342	0.321901	0.636118	0.343664
chr3	130150257	130151152	HYPO25440	0.436364	0.076923	0.35944	0	0.514285
chr3	130842360	130842882	HYPO25458	0.627652	0.30241	0.325242	0.400345	0.281539
chr3	130911648	130911865	HYPO25459	0.673799	0.229727	0.444072	0.588946	0.732759
chr3	135299495	135299629	HYPO25507	0.396825	0.0720085	0.324817	0.0834415	0.083916
chr3	144224752	144224998	HYPO25580	0.687724	0.300981	0.386743	0.461111	0.437735
chr3	147941538	147942161	HYPO25644	0.536116	0.228834	0.307282	0.411237	0.485821
chr3	148468680	148468869	HYPO25649	0.513065	0.207064	0.306001	0.188691	0.50691
chr3	152574786	152575353	HYPO25702	0.656372	0.266515	0.389857	0.646717	0.611314
chr4	8764727	8765188	HYPO25801	0.500205	0.192235	0.307971	0.355361	0.478649
chr4	8993391	8993919	HYPO25809	0.672328	0.217153	0.455175	0.438136	0.440838
chr4	40770902	40771140	HYPO26032	0.549206	0.249093	0.300113	0.561012	0.478515
chr4	41044323	41044480	HYPO26045	0.624459	0.256734	0.367725	0.425373	0.534948
chr4	41611676	41612755	HYPO26073	0.605337	0.22171	0.383626	0.313979	0.28306
chr4	43438413	43438715	HYPO26128	0.718585	0.318518	0.400066	0.679674	0.617227
chr4	45701164	45701355	HYPO26222	0.612271	0.229524	0.382747	0.563095	0.744198
chr4	46588103	46588878	HYPO26263	0.753968	0.255844	0.498124	0.75	0.532937
chr4	46596998	46597571	HYPO26264	0.679649	0.154341	0.525308	0.377778	0.443162
chr4	46610688	46611380	HYPO26265	0.667335	0.323961	0.343374	0.466284	0.528517
chr4	46767841	46768069	HYPO26275	0.510694	0.158385	0.352309	0.125	0.316902
chr4	47438478	47438493	HYPO26295	0.659864	0.173469	0.486395	0.291666	0.70955
chr4	53525423	53525704	HYPO26339	0.424925	0.0861162	0.338809	0.0535714	0.112838
chr4	53872856	53873028	HYPO26345	0.627557	0.265793	0.361764	0.474033	0.37489
chr4	58063212	58063361	HYPO26419	0.699518	0.276587	0.422931	0.385714	0.306384
chr4	59458072	59458563	HYPO26443	0.626313	0.253529	0.372784	0.603716	0.576981
chr4	63251332	63251854	HYPO26497	0.731331	0.292935	0.438396	0.514385	0.503373
chr4	63521942	63522448	HYPO26501	0.629574	0.16983	0.459744	0.412188	0.50068
chr4	63560464	63560865	HYPO26502	0.61674	0.286681	0.33006	0.437481	0.64185
chr4	70952806	70953112	HYPO26520	0.653696	0.323623	0.330073	0.612626	0.516578
chr4	82919672	82919932	HYPO26554	0.670262	0.199165	0.471098	0.58373	0.517375
chr4	94820613	94820939	HYPO26674	0.571429	0.157143	0.414286	0.31619	0.133655
chr4	101183086	101183659	HYPO26760	0.658523	0.307692	0.350832	0.489467	0.457474
chr4	104291924	104292300	HYPO26789	0.615438	0.212744	0.402694	0.273969	0.409477
chr4	106206024	106206726	HYPO26809	0.524083	0.16921	0.354872	0.33539	0.364346
chr4	106538102	106538300	HYPO26825	0.575	0.238889	0.336111	0.45	0.189444
chr4	106621687	106622360	HYPO26827	0.664124	0.144629	0.519495	0.358333	0.467545
chr4	114338969	114339052	HYPO26921	0.52	0.213426	0.306574	0.388889	0.171455
chr4	118162404	118162651	HYPO27050	0.628254	0.135714	0.49254	0.225714	0.21241
chr4	118799641	118800357	HYPO27072	0.622004	0.263548	0.358456	0.364899	0.51933
chr4	120370537	120370613	HYPO27125	0.452526	0.145833	0.306692	0.306667	0.274132
chr4	123621963	123622317	HYPO27193	0.660714	0.307987	0.352728	0.385556	0.403864
chr4	123715753	123715888	HYPO27200	0.663492	0	0.663492	0.302976	0.221635
chr4	124646179	124646685	HYPO27260	0.525	0.170424	0.354576	0.282857	0.356025
chr4	124931251	124931511	HYPO27291	0.528749	0.217706	0.311043	0.466414	0.51945
chr4	125343143	125343416	HYPO27324	0.377706	0.0375	0.340205	0.211806	0.520833
chr4	125914216	125914243	HYPO27362	0.68	0.296667	0.383333	0.726667	0.28
chr4	126220025	126220318	HYPO27378	0.535625	0.182133	0.353492	0.631111	0.487475
chr4	126230402	126230661	HYPO27379	0.590188	0.253348	0.33684	0.357077	0.488695
chr4	126941093	126941271	HYPO27414	0.61	0.225022	0.384978	0.476136	0.428217
chr4	128412694	128412885	HYPO27444	0.59697	0.197708	0.399262	0.254286	0.546599
chr4	128515777	128516241	HYPO27449	0.616631	0.208645	0.407986	0.415993	0.327546
chr4	129825816	129825980	HYPO27540	0.435303	0.132367	0.302936	0.164907	0.210989
chr4	129854270	129854532	HYPO27544	0.520707	0.176282	0.344425	0.197778	0.257399
chr4	129961224	129961401	HYPO27553	0.616667	0.257143	0.359524	0.70068	0.434524
chr4	130466703	130466894	HYPO27576	0.3375	0.0277778	0.309722	0.3	0.238626
chr4	132500093	132500254	HYPO27656	0.634795	0.243559	0.391236	0.337302	0.437554
chr4	133176582	133176968	HYPO27718	0.688254	0.304167	0.384087	0.58305	0.660531
chr4	133398855	133399511	HYPO27738	0.631896	0.297897	0.333999	0.491667	0.566696
chr4	134051002	134051301	HYPO27793	0.716016	0.288999	0.427017	0.480839	0.511016
chr4	134313002	134313269	HYPO27808	0.714935	0.100661	0.614274	0.793155	0.557392
chr4	135061806	135062032	HYPO27859	0.596278	0.220055	0.376224	0.290212	0.310308
chr4	135451180	135451574	HYPO27883	0.59194	0.284657	0.307283	0.393218	0.387914
chr4	136358085	136358656	HYPO27943	0.619467	0.234293	0.385173	0.33371	0.529393
chr4	136372602	136372873	HYPO27945	0.581585	0.197222	0.384363	0.1625	0.386738
chr4	137363365	137363771	HYPO28008	0.569859	0.255331	0.314528	0.29195	0.419451
chr4	137422161	137422332	HYPO28013	0.476191	0.162247	0.313943	0.0694445	0.294147
chr4	137812590	137813252	HYPO28021	0.678321	0.281591	0.39673	0.521455	0.631391
chr4	138383083	138383483	HYPO28070	0.602592	0.292948	0.309644	0.30404	0.501302
chr4	139195736	139195915	HYPO28114	0.808225	0.308881	0.499344	0.602886	0.395057
chr4	139530634	139530751	HYPO28145	0.532401	0.21847	0.313931	0.498333	0.366782
chr4	139780044	139780230	HYPO28162	0.571361	0.258628	0.312733	0.345436	0.420441
chr4	140157098	140157355	HYPO28176	0.655574	0.246032	0.409542	0.470833	0.819013
chr4	140246390	140246498	HYPO28187	0.640984	0.20457	0.436414	0.410714	0.5375
chr4	140296579	140296789	HYPO28191	0.630909	0.257631	0.373278	0.432984	0.576953
chr4	140338873	140339012	HYPO28194	0.642906	0.248638	0.394268	0.512727	0.532763
chr4	140343418	140343864	HYPO28195	0.493333	0.179199	0.314134	0.47483	0.419703
chr4	140508358	140508492	HYPO28207	0.716346	0.239682	0.476664	0.404805	0.463333
chr4	141630061	141630601	HYPO28284	0.619449	0.241162	0.378288	0.390845	0.438294
chr4	141659190	141659579	HYPO28291	0.451389	0.145918	0.305471	0.047619	0.291455
chr4	146181127	146181434	HYPO28363	0.492851	0.127747	0.365104	0.319347	0.366071
chr4	148200404	148200883	HYPO28451	0.663925	0.212634	0.451292	0.177551	0.398138
chr4	148277187	148277324	HYPO28459	0.4875	0.139286	0.348214	0.09	0.129683
chr4	149080245	149080306	HYPO28491	0.73345	0.223775	0.509675	0.459798	0.727467
chr4	149251987	149252229	HYPO28504	0.645238	0.295635	0.349603	0.469444	0.615967
chr4	149263298	149263503	HYPO28505	0.651023	0.262963	0.38806	0.370047	0.209257
chr4	151715051	151715250	HYPO28650_HYPO30326	0.555556	0.119218	0.436338	0.047619	0.05
chr4	151821898	151822022	HYPO28659	0.6625	0.250926	0.411574	NA	0.782407
chr4	153874457	153874678	HYPO28729	0.551389	0.0902778	0.461111	0.15625	0.385317
chr4	154680620	154680925	HYPO28783	0.531746	0.160082	0.371664	0.345599	0.290283
chr4	155444228	155444725	HYPO28830	0.692496	0.270238	0.422258	0.436054	0.553485
chr5	20186858	20187103	HYPO28919	0.659288	0.291222	0.368066	0.638517	0.58001
chr5	20473729	20474295	HYPO28925	0.540754	0.193846	0.346908	0.208974	0.38693
chr5	24495626	24496500	HYPO29020	0.540945	0.239298	0.301647	0.493764	0.411998
chr5	24587485	24587530	HYPO29025	0.556071	0.253334	0.302738	0.654808	0.436269
chr5	28391107	28392069	HYPO29049	0.572861	0.240311	0.33255	0.456137	0.613829
chr5	28642005	28642165	HYPO29058	0.848747	0.280797	0.56795	0.754506	0.764771
chr5	33694714	33695275	HYPO29164	0.503175	0.0994708	0.403704	0.227665	0.450397
chr5	34024403	34024688	HYPO29180	0.578095	0.239286	0.33881	0.405714	0.486079
chr5	37113660	37114100	HYPO29260	0.495571	0.153009	0.342562	0.45754	0.37252
chr5	38212564	38212891	HYPO29292	0.585918	0.251747	0.334172	0.381839	0.269873
chr5	39215521	39216052	HYPO29322	0.658477	0.254176	0.404301	0.336508	0.53424
chr5	43472994	43473747	HYPO29334	0.486206	0.177839	0.308367	0.33881	0.245778
chr5	53001007	53001217	HYPO29397	0.354029	0.0521885	0.301841	0.154899	0.318147
chr5	53680811	53680977	HYPO29414	0.570833	0.22619	0.344643	0.214286	0.378803
chr5	65350217	65351110	HYPO29472	0.523208	0.216382	0.306826	0.349057	0.387061
chr5	65351221	65351428	HYPO29473	0.493845	0.0902778	0.403567	0.378126	0.530878
chr5	65417160	65417395	HYPO29476	0.421673	0.111058	0.310615	0.138889	0.215733
chr5	66242077	66242390	HYPO29493	0.600648	0.266468	0.33418	0.377346	0.557457
chr5	66302871	66303192	HYPO29496	0.558413	0.180621	0.377792	0.286111	0.555039
chr5	66310690	66310799	HYPO29497	0.440972	0.125	0.315972	NA	0.426923
chr5	66466196	66466719	HYPO29504	0.500941	0.12727	0.37367	0.189732	0.420616
chr5	66544705	66545128	HYPO29510	0.609788	0.150129	0.459659	0.248022	0.404334
chr5	67841594	67841859	HYPO29545	0.778692	0.332514	0.446178	0.51828	0.646474
chr5	73632798	73632952	HYPO29583	0.551262	0.188456	0.362807	0.298809	0.436382
chr5	75681963	75682255	HYPO29626	0.554538	0.220233	0.334305	0.341518	0.540079
chr5	75862919	75863150	HYPO29629	0.559167	0.233547	0.32562	0.439394	0.349575
chr5	76126165	76126395	HYPO29632	0.57521	0.153571	0.421639	0.430963	0.366835
chr5	76329766	76330021	HYPO29642	0.557065	0.24199	0.315075	0.428419	0.110933
chr5	77596552	77596685	HYPO29669	0.385714	0.0357143	0.35	0.4125	0.508949
chr5	77797259	77797561	HYPO29678	0.623333	0.299134	0.324199	0.396825	0.168773
chr5	77960268	77960749	HYPO29686	0.691809	0.336685	0.355124	0.366835	0.634813
chr5	90971567	90971786	HYPO29731	0.75	0.375	0.375	0.821429	0.5
chr5	93356722	93356998	HYPO29788	0.698966	0.227544	0.471422	0.441636	0.474062
chr5	93393807	93394000	HYPO29790	0.588095	0.210185	0.37791	0.478344	0.552096
chr5	97377886	97378317	HYPO29815	0.714951	0.33166	0.383291	0.282339	0.5381
chr5	104185303	104185595	HYPO29927	0.363399	0.0622222	0.301176	0.206753	0.285317
chr5	105872306	105872816	HYPO29961	0.478036	0.175882	0.302154	0.266082	0.335891
chr5	106080548	106080734	HYPO29965	0.543127	0.237057	0.30607	0.420593	0.2677
chr5	106144519	106144790	HYPO29970	0.592007	0.279138	0.312869	0.306653	0.266187
chr5	107942672	107942837	HYPO30016	0.497108	0.175653	0.321455	0.245018	0.359238
chr5	112671372	112671711	HYPO30143	0.529832	0.166667	0.363165	0.356349	0.271895
chr5	112721096	112721305	HYPO30151	0.549123	0.215986	0.333137	0.429592	0.596864
chr5	112727359	112727955	HYPO30152	0.637687	0.282565	0.355122	0.533876	0.390607
chr5	113639110	113639205	HYPO30203	0.580688	0.203175	0.377513	0.325	0.245316
chr5	114932683	114932928	HYPO30303	0.458009	0.0259259	0.432083	0.207814	0.0758697
chr5	115616445	115616727	HYPO30351	0.504329	0.144487	0.359842	0.253333	0.225909
chr5	117960951	117961061	HYPO30468	0.557143	0.189783	0.367359	0.19697	0.546191
chr5	120205977	120206093	HYPO30570	0.625	0	0.625	NA	0.52
chr5	121008839	121009172	HYPO30628	0.496886	0.159524	0.337362	0.329762	0.338231
chr5	121154139	121154857	HYPO30647	0.517979	0.175926	0.342053	0.444558	0.510189
chr5	122480614	122480761	HYPO30706	0.575	0.15	0.425	NA	0.328896
chr5	122511015	122511255	HYPO30711	0.45	0.14881	0.301191	0.390476	0.0815296
chr5	122683118	122683438	HYPO30728	0.634738	0.226042	0.408697	0.544955	0.646076
chr5	123440362	123440727	HYPO30769	0.653533	0.314502	0.339031	0.445305	0.453129
chr5	124472318	124472614	HYPO30826	0.699932	0.175505	0.524428	0.733784	0.595426
chr5	124499995	124500576	HYPO30828	0.547422	0.225064	0.322358	0.273306	0.305165
chr5	124501893	124502537	HYPO30829	0.607135	0.287964	0.31917	0.333703	0.375893
chr5	124525718	124526035	HYPO30830	0.696825	0.25496	0.441865	0.554365	0.474074
chr5	124664700	124665098	HYPO30837	0.590514	0.262107	0.328407	0.304048	0.688574
chr5	124668022	124668377	HYPO30838	0.520844	0.204087	0.316757	0.273545	0.24639
chr5	132024979	132025095	HYPO31049	0.563782	0.223809	0.339972	0.204167	0.385714
chr5	134690105	134690702	HYPO31072	0.627271	0.254762	0.372509	0.355556	0.44361
chr5	134921065	134921667	HYPO31082	0.673809	0.330208	0.343601	0.530159	0.296115
chr5	136542419	136542815	HYPO31176	0.500203	0.17598	0.324224	0.38492	0.423938
chr5	138012470	138012700	HYPO31247	0.642857	0.272857	0.37	0.3625	0.589524
chr5	139775044	139775877	HYPO31311	0.621268	0.270374	0.350894	0.521726	0.651224
chr5	139925186	139925757	HYPO31326	0.504944	0.17718	0.327764	0.205347	0.343331
chr5	141093633	141094145	HYPO31391	0.610687	0.268898	0.341789	0.429048	0.50876
chr5	141420650	141420835	HYPO31406	0.602564	0.125926	0.476638	0.513095	0.62974
chr5	143556007	143556677	HYPO31441	0.661515	0.31146	0.350056	0.507823	0.60463
chr5	148174652	148174974	HYPO31596	0.545685	0.166385	0.3793	0.387037	0.463443
chr5	148204424	148204620	HYPO31598	0.678785	0.265539	0.413246	0.617808	0.731157
chr5	148375520	148375690	HYPO31603	0.490476	0.18	0.310476	NA	0.305556
chr5	149191205	149191482	HYPO31633	0.824375	0.286325	0.53805	0.801282	0.796778
chr5	151395215	151395439	HYPO31710	0.573333	0.173809	0.399524	0.295714	0.418604
chr5	152049643	152050445	HYPO31721	0.524097	0.213339	0.310758	0.166954	0.380732
chr6	17359792	17360246	HYPO31837	0.64375	0.220833	0.422917	0.409162	0.624881
chr6	22373646	22374568	HYPO31871	0.7329	0.276364	0.456537	0.557143	0.475598
chr6	28269087	28269298	HYPO31900	0.712231	0.268087	0.444144	0.349394	0.440953
chr6	34825418	34825851	HYPO32051	0.689384	0.154094	0.535289	0.234694	0.414117
chr6	38724679	38724708	HYPO32102	0.611508	0.234694	0.376814	0.669331	0.528571
chr6	48682913	48683185	HYPO32235	0.605476	0.163333	0.442143	0.2625	0.34047
chr6	48971165	48971770	HYPO32245	0.659923	0.322429	0.337494	0.505857	0.496945
chr6	51230264	51230525	HYPO32296	0.540952	0.191341	0.349611	0.226667	0.544134
chr6	51311871	51312094	HYPO32297	0.643784	0.163889	0.479895	0.566667	0.645551
chr6	53648398	53648493	HYPO32377	0.446886	0.104935	0.341951	0.334091	0.233333
chr6	53971408	53971634	HYPO32388	0.795139	0.264583	0.530556	0.925	0.651538
chr6	54112643	54113114	HYPO32393	0.588961	0.252246	0.336715	0.308419	0.533627
chr6	54721284	54721533	HYPO32410	0.62274	0.271429	0.351311	0.377381	0.402964
chr6	58856843	58856955	HYPO32458	0.775499	0.285559	0.48994	0.578139	0.370627
chr6	66879819	66879979	HYPO32494	0.494485	0.108824	0.385662	0.204762	0.190392
chr6	67006312	67006525	HYPO32498	0.732336	0.265559	0.466777	0.166071	0.38969
chr6	71706611	71707416	HYPO32548	0.586751	0.23474	0.35201	0.52758	0.527465
chr6	72912232	72912508	HYPO32610	0.606963	0.222286	0.384677	0.245974	0.228889
chr6	87155455	87155791	HYPO32782	0.594048	0.158333	0.435714	0.332222	0.348553
chr6	87178006	87178243	HYPO32783	0.759615	0.367526	0.392089	0.249621	0.557302
chr6	87482471	87482736	HYPO32793	0.662003	0.327074	0.334928	0.509431	0.714602
chr6	87483024	87483799	HYPO32794	0.543452	0.234283	0.309169	0.454321	0.366926
chr6	88692402	88692577	HYPO32838	0.669444	0.274411	0.395034	0.488095	0.476241
chr6	91059931	91060668	HYPO32895	0.689903	0.307034	0.382869	0.422776	0.339506
chr6	94710777	94710961	HYPO32962	0.686762	0.287741	0.399022	0.51164	0.640999
chr6	94807976	94808576	HYPO32965	0.519048	0.20761	0.311438	0.430794	0.585823
chr6	96964040	96964264	HYPO32980	0.613691	0.301696	0.311994	0.261678	0.46035
chr6	99661961	99661982	HYPO33028	0.625	0.15	0.475	0.775	0.68141
chr6	99671129	99671361	HYPO33029	0.626715	0.29204	0.334675	0.570025	0.556259
chr6	100164694	100164772	HYPO33046	0.725	0	0.725	NA	0.125
chr6	103423181	103423594	HYPO33074	0.548737	0.237661	0.311077	0.568182	0.359565
chr6	108667512	108667838	HYPO33102	0.539799	0.150623	0.389177	0.346428	0.304502
chr6	112497385	112497547	HYPO33117	0.495282	0.191841	0.30344	0.434686	0.474459
chr6	114483331	114483733	HYPO33194	0.645455	0.341667	0.303788	NA	0.303114
chr6	114490636	114490835	HYPO33196	0.553535	0.166667	0.386869	0.5	0.304082
chr6	114938502	114938876	HYPO33226	0.436667	0.134632	0.302035	0.229166	0.430113
chr6	115680348	115680499	HYPO33246	0.610498	0.284722	0.325776	0.312434	0.401038
chr6	116593165	116593296	HYPO33276	0.570274	0.233333	0.336941	0.564445	0.716795
chr6	117381546	117381855	HYPO33289	0.659524	0.271057	0.388466	0.328345	0.47214
chr6	118209831	118210000	HYPO33310	0.567949	0.249624	0.318325	0.416825	0.585714
chr6	120403003	120403323	HYPO33351	0.616957	0.263735	0.353222	0.314603	0.501968
chr6	120419586	120420292	HYPO33354	0.554895	0.155678	0.399218	0.239377	0.414265
chr6	120865184	120865512	HYPO33367	0.515801	0.162222	0.353579	0.21746	0.358382
chr6	121165154	121165627	HYPO33378	0.581434	0.277906	0.303528	0.369733	0.498677
chr6	121197939	121198035	HYPO33381	0.345614	0.0435606	0.302053	0.335816	0.491382
chr6	124670892	124671114	HYPO33452	0.561813	0.230457	0.331357	0.257365	0.4161
chr6	124679696	124680139	HYPO33454	0.608617	0.183333	0.425283	0.55368	0.445887
chr6	124682377	124682553	HYPO33455	0.764236	0.31369	0.450546	0.533929	0.660895
chr6	125215248	125215553	HYPO33502	0.53351	0.2034	0.33011	0.187005	0.238939
chr6	127516253	127516428	HYPO33570	0.368398	0.03125	0.337148	0.303571	0.190923
chr6	134014924	134015357	HYPO33638	0.636023	0.216606	0.419417	0.60083	0.546241
chr6	134314337	134314948	HYPO33647	0.673782	0.251591	0.422192	0.351722	0.522757
chr6	135909710	135909923	HYPO33694	0.71115	0.263933	0.447217	0.60873	0.776777
chr6	136692276	136692449	HYPO33715	0.561458	0.25519	0.306268	0.451825	0.649752
chr6	137525711	137525831	HYPO33744	0.540657	0.120087	0.42057	0.190873	0.234545
chr6	140230562	140230810	HYPO33759	0.452635	0.089899	0.362736	0.375926	0.301418
chr6	143129189	143129259	HYPO33807	0.834308	0.279998	0.554311	0.690278	0.54582
chr6	145038721	145039131	HYPO33820	0.762121	0.210769	0.551352	0.328373	0.480917
chr6	145070450	145071704	HYPO33822	0.609004	0.299803	0.309201	0.383179	0.469545
chr6	145142123	145142196	HYPO33823	0.487374	0.103788	0.383586	0.546428	0.516312
chr6	146169971	146170987	HYPO33846	0.544888	0.195992	0.348896	0.335817	0.396566
chr6	146401062	146401269	HYPO33849	0.728916	0.31621	0.412706	0.462334	0.695973
chr7	4013925	4014012	HYPO33919	0.7	0	0.7	NA	NA
chr7	5052807	5053295	HYPO33983	0.596429	0.267788	0.328641	0.435119	0.712205
chr7	8120097	8122042	HYPO34024	0.4	0	0.4	NA	0.285714
chr7	17317370	17317596	HYPO34112	0.564142	0.236282	0.32786	0.258182	0.156802
chr7	19904093	19904191	HYPO34218	0.744014	0.257265	0.486749	0.591492	0.664693
chr7	20085783	20086406	HYPO34240	0.521002	0.219545	0.301456	0.425397	0.399379
chr7	20430121	20430264	HYPO34273	0.56359	0.203434	0.360156	0.511111	0.451111
chr7	23340736	23342968	HYPO36224_HYPO34292	0.5625	0.166667	0.395833	0.25	0.316667
chr7	25164890	25165251	HYPO34318	0.587475	0.235476	0.351999	0.287619	0.401906
chr7	25217831	25217902	HYPO34324	0.595238	0.207936	0.387302	0.670606	0.373718
chr7	25587310	25587667	HYPO34347	0.537326	0.23007	0.307256	0.362727	0.513705
chr7	25905319	25906057	HYPO34372_HYPO36292	0.523437	0.209837	0.3136	0.321225	0.442661
chr7	25937240	25937457	HYPO34378	0.75	0.375	0.375	NA	0.421429
chr7	25990316	25990627	HYPO34383	0.57745	0.234417	0.343032	0.342901	0.520009
chr7	26429283	26429833	HYPO34405	0.5468	0.235317	0.311483	0.509151	0.244096
chr7	26430115	26430389	HYPO34406	0.621039	0.270669	0.35037	0.614677	0.416214
chr7	31202604	31203374	HYPO34641	0.679311	0.347946	0.331365	0.513723	0.616379
chr7	31617582	31617821	HYPO34677_HYPO36607	0.711111	0.321071	0.39004	0.55	0.466538
chr7	38875199	38875579	HYPO34815	0.568337	0.233809	0.334528	0.413889	0.578298
chr7	38948383	38948970	HYPO34817	0.519938	0.201058	0.31888	0.273465	0.35784
chr7	50788310	50788525	HYPO34858	0.767677	0.0416667	0.72601	0.586667	0.745665
chr7	52563913	52564052	HYPO34979	0.715332	0.303401	0.41193	0.259864	0.609814
chr7	53313849	53314059	HYPO35056	0.603843	0.302879	0.300964	0.771354	0.832367
chr7	53645062	53645349	HYPO35067	0.567724	0.219914	0.34781	0.399603	0.647734
chr7	56374492	56374677	HYPO35113	0.615079	0.269286	0.345794	0.2	0.660409
chr7	62853881	62853993	HYPO35161	0.537374	0.21663	0.320744	0.57381	0.492144
chr7	67300507	67300563	HYPO35183	0.561448	0.242063	0.319385	0.55	0.410353
chr7	71146587	71147048	HYPO35218	0.665556	0.281198	0.384358	0.383705	0.460909
chr7	72026306	72026594	HYPO35239	0.637235	0.247869	0.389365	0.601399	0.548572
chr7	74645103	74645522	HYPO35289	0.689915	0.210101	0.479814	0.473095	0.603813
chr7	75293190	75293613	HYPO35308	0.600958	0.226007	0.374951	0.222222	0.346967
chr7	77472305	77474341	HYPO35338	0.629715	0.329095	0.30062	0.30367	0.47403
chr7	77512553	77513351	HYPO35350	0.659171	0.304821	0.354349	0.457959	0.360405
chr7	82716760	82717198	HYPO35406	0.626164	0.300533	0.325631	0.479998	0.667586
chr7	82941407	82941753	HYPO35419	0.455839	0.145833	0.310005	0.15377	0.150947
chr7	85938933	85939236	HYPO35437	0.65055	0.246897	0.403653	0.408425	0.497747
chr7	86460110	86460309	HYPO35459	0.539433	0.188866	0.350567	0.248016	0.288426
chr7	87236046	87236371	HYPO35509	0.662293	0.183673	0.47862	0.358163	0.491642
chr7	96984253	96984449	HYPO35654	0.558526	0.220945	0.337581	0.483333	0.558859
chr7	103852453	103852560	HYPO35708	0.700964	0.245238	0.455726	0.25	0.528893
chr7	106473492	106473697	HYPO35777	0.4875	0.125	0.3625	0.166667	0.406674
chr7	108208601	108209279	HYPO35841	0.689974	0.193266	0.496708	0.569048	0.541259
chr7	108505110	108505756	HYPO35850	0.633333	0.107407	0.525926	0.6	0.509259
chr7	108605238	108605864	HYPO35858	0.619426	0.243496	0.37593	0.352351	0.43616
chr7	114851201	114851577	HYPO35938	0.578747	0.246944	0.331804	0.366498	0.254554
chr7	120217408	120217542	HYPO36022	0.597109	0.260952	0.336157	0.369231	0.600501
chr7	120837503	120838245	HYPO36039	0.55677	0.225699	0.331071	0.373314	0.502784
chr7	121212957	121213577	HYPO36044	0.758639	0.233723	0.524916	0.610149	0.738426
chr7	122759532	122760094	HYPO36064	0.445171	0.123369	0.321801	0.329861	0.323483
chr7	124537179	124537967	HYPO36086	0.598982	0.247426	0.351556	0.392778	0.474286
chr7	128660302	128661168	HYPO36168	0.511213	0.201527	0.309686	0.476786	0.536928
chr7	129453462	129454419	HYPO36185	0.594554	0.256839	0.337716	0.45188	0.565691
chr7	132746688	132747167	HYPO36218	0.596707	0.26308	0.333628	0.365968	0.518281
chr7	133512642	133512864	HYPO36240	0.646825	0.219102	0.427724	0.703605	0.652372
chr7	133512954	133513398	HYPO36241	0.572109	0.189762	0.382347	0.408608	0.380087
chr7	133615641	133615958	HYPO36248	0.675733	0.323386	0.352347	0.585714	0.577284
chr7	134457413	134457703	HYPO36305	0.518651	0.166409	0.352242	0.25484	0.347689
chr7	135395530	135395732	HYPO36352	0.576819	0.23373	0.343089	0.354365	0.278492
chr7	135535409	135535889	HYPO36357	0.66562	0.253346	0.412275	0.351786	0.591766
chr7	139760636	139760758	HYPO36430	0.529323	0.132892	0.396431	0.564935	0.486111
chr7	142844534	142844843	HYPO36485	0.489443	0.143044	0.3464	0.611111	0.560203
chr7	142860619	142860769	HYPO36486	0.583838	0.256667	0.327172	0.26948	0.286111
chr7	142996434	142996768	HYPO36490	0.575985	0.0770563	0.498929	0.305	0.403282
chr7	143773639	143773974	HYPO36508	0.61369	0.192203	0.421487	0.339292	0.366191
chr7	146209304	146209797	HYPO36540	0.634176	0.262184	0.371992	0.37486	0.572975
chr7	148281978	148282865	HYPO36619	0.557614	0.21169	0.345924	0.283841	0.482612
chr7	149268033	149268169	HYPO36662	0.737202	0.364286	0.372917	0.607967	0.668838
chr7	149526259	149526791	HYPO36669	0.62661	0.296642	0.329968	0.507504	0.594675
chr7	149767924	149767991	HYPO36679	0.649964	0.235858	0.414106	0.715278	0.457598
chr8	3352595	3353577	HYPO36765	0.60617	0.264611	0.341558	0.448755	0.540787
chr8	3606702	3606785	HYPO36775	0.59752	0.27257	0.32495	0.583333	0.399588
chr8	9317056	9317775	HYPO36828	0.496038	0.194949	0.301088	0.504444	0.517857
chr8	9423764	9424047	HYPO36829	0.613206	0.242703	0.370503	0.458562	0.282677
chr8	10519478	10519743	HYPO36842	0.571723	0.209324	0.362399	0.564645	0.397273
chr8	14986728	14986938	HYPO36973	0.468085	0.155556	0.312529	0.532738	0.495623
chr8	25302943	25303056	HYPO37061	0.479624	0.108333	0.371291	0.234091	0.318182
chr8	26384497	26384695	HYPO37095	0.744865	0.29243	0.452435	0.429167	0.386121
chr8	27943613	27944300	HYPO37135	0.687869	0.339979	0.347891	0.479199	0.523422
chr8	28119391	28119768	HYPO37142	0.422571	0.0733333	0.349238	0.0936507	0.205102
chr8	35685725	35687094	HYPO37231	0.531111	0.228943	0.302168	0.395626	0.515144
chr8	36603502	36603831	HYPO37250	0.723681	0.262566	0.461114	0.514657	0.606587
chr8	36741860	36742750	HYPO37254	0.563215	0.211018	0.352196	0.318147	0.466345
chr8	43229766	43229971	HYPO37329	0.612954	0.219852	0.393101	0.524845	0.493985
chr8	49825715	49825839	HYPO37423	0.525794	0.162824	0.36297	0.307028	0.238584
chr8	66848685	66849063	HYPO37512	0.354121	0.0416668	0.312454	0.225	0.172727
chr8	71692383	71692570	HYPO37554	0.481946	0.168867	0.313078	0.39704	0.277729
chr8	73122256	73122496	HYPO37631	0.566865	0.263843	0.303022	0.47771	0.164111
chr8	74294577	74294838	HYPO37731	0.600276	0.281649	0.318627	0.595548	0.680883
chr8	75285261	75285812	HYPO37760	0.712085	0.113333	0.598752	0.143939	0.506838
chr8	80033140	80033351	HYPO37774	0.834473	0.28547	0.549003	0.731643	0.729012
chr8	81891447	81891566	HYPO37802	0.534694	0.2	0.334694	0.194848	0.118019
chr8	86587843	86588033	HYPO37879	0.446474	0.10625	0.340224	0.0819128	0.233869
chr8	87349689	87350226	HYPO37937	0.56978	0.1893	0.38048	0.344017	0.408121
chr8	91159104	91159486	HYPO38048	0.565476	0.241981	0.323495	0.35	0.317619
chr8	94781931	94782379	HYPO38112	0.557121	0.250278	0.306843	0.46	0.511811
chr8	95377348	95377945	HYPO38126	0.647262	0.296042	0.35122	0.61921	0.53875
chr8	96878273	96878657	HYPO38158	0.697534	0.260198	0.437337	0.455102	0.563294
chr8	97064943	97065361	HYPO38166	0.657537	0.268488	0.389048	0.500695	0.549673
chr8	97520638	97520796	HYPO38195	0.568572	0.227912	0.34066	0.342222	0.327767
chr8	97771214	97771594	HYPO38209	0.75	0.216667	0.533333	0.4	0.642349
chr8	98222095	98222521	HYPO38228	0.508354	0.175036	0.333318	0.174107	0.250454
chr8	107792730	107792782	HYPO38287	0.712013	0.268651	0.443363	0.513095	0.181004
chr8	107879125	107879445	HYPO38300	0.539743	0.15625	0.383493	0.168027	0.300165
chr8	107979056	107979464	HYPO38306	0.653714	0.256036	0.397677	0.376331	0.379118
chr8	108955389	108955714	HYPO38351	0.529288	0.209944	0.319343	0.462081	0.439992
chr8	118030633	118030840	HYPO38543	0.801939	0.207343	0.594596	0.664815	0.599752
chr8	118142372	118142646	HYPO38546	0.700602	0.17522	0.525382	0.516178	0.609223
chr8	119606945	119607260	HYPO38566	0.608431	0.200136	0.408295	0.280591	0.324086
chr8	119772308	119772453	HYPO38572	0.585734	0.2782	0.307534	0.437229	0.49451
chr8	120060648	120061253	HYPO38586	0.619865	0.318522	0.301343	0.55	0.307404
chr8	120067760	120067990	HYPO38587	0.651682	0.231191	0.420491	0.575476	0.510952
chr8	120225902	120226081	HYPO38592	0.539908	0.212999	0.326909	0.353788	0.479468
chr8	121521993	121522439	HYPO38602	0.46307	0.147712	0.315357	0.264863	0.298613
chr8	122351399	122351827	HYPO38642	0.590641	0.22034	0.370301	0.384568	0.448688
chr8	122538146	122538351	HYPO38654	0.639966	0.265986	0.37398	0.175	0.206633
chr8	122794469	122794679	HYPO38668	0.480664	0.168883	0.311782	0.314987	0.44251
chr8	122808861	122809525	HYPO38670	0.470671	0.1558	0.314871	0.185	0.199881
chr8	122830997	122831327	HYPO38673	0.67607	0.1469	0.529169	0.255246	0.426679
chr8	122947664	122947801	HYPO38683	0.637721	0.253119	0.384601	0.194286	0.459474
chr8	123225889	123226275	HYPO38708	0.562719	0.238998	0.323721	0.34127	0.503319
chr8	123455057	123455389	HYPO38724	0.341991	0.0416668	0.300324	0.166666	0.354762
chr8	124634226	124634510	HYPO38818	0.585317	0.24671	0.338608	0.349206	0.378344
chr8	124860057	124860103	HYPO38830	0.6	0.285714	0.314286	0.64	0.154759
chr8	125222064	125222619	HYPO38857	0.550099	0.231329	0.318771	0.211905	0.637301
chr8	125224292	125226839	HYPO38859	0.591618	0.264057	0.327561	0.366486	0.562389
chr8	125233163	125233352	HYPO38860	0.5	0.186508	0.313492	0.294048	0.383443
chr8	125388453	125388653	HYPO38870	0.638889	0.274074	0.364815	0.266666	0.542517
chr8	125878183	125878368	HYPO38897	0.458035	0.12214	0.335896	0.379509	0.220482
chr8	126783980	126784468	HYPO38965	0.613463	0.298718	0.314745	0.368783	0.475672
chr8	127914749	127915408	HYPO39006	0.68641	0.233598	0.452812	0.507234	0.664538
chr8	128022313	128022754	HYPO39007	0.650569	0.24834	0.40223	0.401948	0.387237
chr8	128124046	128124546	HYPO39012	0.558036	0.234848	0.323188	0.34011	0.638085
chr9	13273337	13273647	HYPO39119	0.567857	0.266666	0.301191	0.412037	0.415507
chr9	21000786	21001187	HYPO39213	0.685238	0.183922	0.501316	0.233333	0.416618
chr9	21136281	21136817	HYPO39228	0.616083	0.272601	0.343483	0.538672	0.561388
chr9	24990290	24990401	HYPO39316	0.672369	0.306699	0.36567	0.422115	0.763812
chr9	29458279	29458734	HYPO39348	0.382867	0.0666666	0.3162	0	0.243056
chr9	30935573	30935959	HYPO39370	0.57691	0.266019	0.310891	0.189286	0.368144
chr9	32314770	32315415	HYPO39398	0.523663	0.11572	0.407943	0.286464	0.465895
chr9	37361927	37362867	HYPO39482	0.427381	0.116071	0.311309	0.260417	0.390303
chr9	42678496	42678613	HYPO39580	0.472728	0.166667	0.306061	0.25	0.875
chr9	43436949	43437124	HYPO39604	0.507829	0.177778	0.330051	0.478503	0.254613
chr9	43920124	43920227	HYPO39633	0.584175	0.228175	0.356	0.483333	0.418262
chr9	44021808	44022018	HYPO39640	0.764698	0.25616	0.508538	0.725695	0.724792
chr9	44390502	44390765	HYPO39672	0.642762	0.283808	0.358955	0.511694	0.551471
chr9	44806344	44806602	HYPO39692	0.526576	0.159199	0.367377	0.315444	0.453873
chr9	45480424	45480577	HYPO39719	0.571429	0.25	0.321429	NA	0.25
chr9	47781478	47781600	HYPO39770	0.461607	0.125	0.336607	0.4	0.536905
chr9	48622678	48622916	HYPO39797	0.608578	0.213866	0.394712	0.271146	0.385698
chr9	50661022	50661316	HYPO39848	0.65223	0.299786	0.352444	0.377689	0.382722
chr9	56456603	56457145	HYPO39946	0.554813	0.166667	0.388147	0.295536	0.347571
chr9	56468803	56468966	HYPO39948	0.524167	0.166572	0.357595	0.227698	0.258537
chr9	58383733	58383995	HYPO40040	0.545833	0.227857	0.317976	0.375	0.417806
chr9	60846643	60847223	HYPO40089	0.54951	0.240224	0.309286	0.354308	0.413388
chr9	61197551	61197859	HYPO40098	0.504278	0.131111	0.373167	0.298889	0.542256
chr9	61226435	61226726	HYPO40100	0.500361	0.182828	0.317532	0.201905	0.156063
chr9	61237026	61237195	HYPO40102	0.61	0.183333	0.426667	0.404545	0.364799
chr9	61721130	61721442	HYPO40117	0.576156	0.210417	0.365739	0.331818	0.332574
chr9	63567707	63568033	HYPO40178	0.565411	0.248622	0.31679	0.149643	0.212185
chr9	64075546	64075812	HYPO40213	0.568029	0.239348	0.328681	0.277131	0.574711
chr9	71515335	71515761	HYPO40384	0.522998	0.126364	0.396634	0.0619048	0.296318
chr9	75262137	75262213	HYPO40444	0.361742	0.0416668	0.320076	0.0833333	0.125
chr9	78381241	78381416	HYPO40499	0.559127	0.215745	0.343382	0.620833	0.369699
chr9	80334505	80335260	HYPO40524	0.465671	0.164536	0.301135	0.412381	0.494037
chr9	83005718	83006254	HYPO40533	0.546737	0.242531	0.304206	0.444712	0.35466
chr9	83171505	83172075	HYPO40536	0.52328	0.216288	0.306993	0.490675	0.564454
chr9	83536905	83537652	HYPO40546	0.591228	0.273202	0.318027	0.361111	0.368912
chr9	87622100	87622354	HYPO40583	0.527313	0.222884	0.304429	0.0444445	0.304739
chr9	96536878	96537773	HYPO40678	0.616959	0.311866	0.305093	0.444353	0.598534
chr9	96836045	96836675	HYPO40690	0.544592	0.231959	0.312633	0.332152	0.234479
chr9	102443585	102444295	HYPO40768	0.571838	0.239748	0.33209	0.480219	0.763405
chr9	103049135	103049439	HYPO40792	0.556909	0.247385	0.309524	0.41627	0.536228
chr9	104241068	104241535	HYPO40823	0.645312	0.331943	0.313369	0.440308	0.597012
chr9	105943323	105943537	HYPO40845	0.55989	0.209127	0.350763	0.317857	0.444261
chr9	106288530	106288727	HYPO40863	0.674887	0.226422	0.448464	0.274405	0.457303
chr9	106415174	106415613	HYPO40877	0.527576	0.181288	0.346288	0.347619	0.334436
chr9	108953235	108953789	HYPO41007	0.596528	0.27181	0.324718	0.517857	0.599279
chr9	114684282	114684791	HYPO41117	0.520779	0.158333	0.362446	0.308586	0.511741
chr9	114686673	114687604	HYPO41118	0.622805	0.194929	0.427876	0.441679	0.510311
chr9	118634327	118634478	HYPO41182	0.614024	0.20401	0.410014	0.329262	0.614927
chr9	118730682	118731061	HYPO41183	0.460904	0.146407	0.314497	0.234533	0.282923
chr9	119055446	119055555	HYPO41195	0.433333	0	0.433333	0	0.333333
chr9	121037201	121037368	HYPO41267_HYPO43489	0.625	0.31	0.315	NA	0.703542
chr9	121522391	121523237	HYPO41287	0.528776	0.157936	0.37084	0.507143	0.379478
chrX	3814799	3816224	HYPO41367	0.604167	0.3	0.304167	NA	0.5
chrX	7222183	7222972	HYPO41389_HYPO43619	0.457639	0.127273	0.330366	0	0.308849
chrX	9995415	9995801	HYPO41440	0.702922	0.197619	0.505303	0.3125	0.440476
chrX	11021654	11021819	HYPO41450	0.483333	0.0666666	0.416667	0.296428	0.156436
chrX	11102513	11102681	HYPO41454	0.475198	0.0944445	0.380754	0.3875	0.304762
chrX	11430054	11430758	HYPO41466	0.75	0.338889	0.411111	0.75	0.394286
chrX	11659903	11660102	HYPO41477	0.731951	0.291342	0.440609	0.642328	0.443386
chrX	11729520	11729697	HYPO41486	0.625	0.25	0.375	NA	0.139881
chrX	12147637	12147762	HYPO41496	0.657168	0.119048	0.538121	0.333333	0.4625
chrX	12783834	12784160	HYPO41510	0.584538	0.25	0.334538	0.378231	0.268037
chrX	26124413	26126513	HYPO41575	0.75	0.242857	0.507143	NA	0.271111
chrX	26231524	26232337	HYPO41577	0.649206	0.322857	0.326349	0.548571	0.482143
chrX	34521014	34521280	HYPO41631	0.79623	0.215079	0.581151	0.725	0.82215
chrX	45490105	45490433	HYPO41683	0.847222	0.0833333	0.763889	0.6	0.689286
chrX	48438339	48438569	HYPO41734	0.573939	0.193333	0.380606	0.666667	0.5625
chrX	54449434	54450007	HYPO41792	0.618471	0.286627	0.331844	0.704233	0.545248
chrX	55410453	55410895	HYPO41806	0.585714	0.27619	0.309524	0.833333	0.25
chrX	57252717	57253479	HYPO41812	0.530858	0.227324	0.303534	0.491667	0.627922
chrX	58422919	58423592	HYPO41826	0.625	0.175	0.45	0.45	0.46875
chrX	72108905	72109255	HYPO44157_HYPO41925	0.4	0.1	0.3	NA	0.0833333
chrX	84503027	84503905	HYPO41975	1	0.333333	0.666667	1	1
chrX	91108010	91109137	HYPO41985	0.591191	0.177778	0.413413	0.667857	0.50582
chrX	91788806	91789070	HYPO42000	0.55	0.25	0.3	NA	NA
chrX	96777147	96777915	HYPO42046	0.409375	0.0972222	0.312153	0.090625	0.125758
chrX	98509464	98509912	HYPO42070	0.462358	0.152778	0.30958	0.192857	0.330241
chrX	98962753	98963304	HYPO42082	0.527337	0.189021	0.338316	0.142857	0.456002
chrX	99289736	99290089	HYPO42093	0.428571	0.125	0.303571	0.25	0.574405
chrX	99758969	99759403	HYPO42101	0.6	0.25	0.35	0.2	0.592063
chrX	100057572	100059071	HYPO42104_HYPO44349	0.5	0.1	0.4	0	0.116515
chrX	103417487	103417502	HYPO42155	0.959184	0.251701	0.707483	0.807143	0.431122
chrX	131117341	131117584	HYPO42255	0.666667	0.248571	0.418095	0.75	0.75
chrX	131276388	131276728	HYPO42263	0.524242	0.158333	0.365909	0.625	0.141667
chrX	136332541	136332727	HYPO42323	0.58322	0.117803	0.465417	0.426667	0.345869
chrX	136347838	136348169	HYPO42324	0.702143	0.15	0.552143	0.594445	0.511544
chrX	136348639	136349087	HYPO42325	0.833333	0.315816	0.517517	0.506812	0.58557
chrX	156173498	156173699	HYPO42460	0.325	0.025	0.3	0.202381	0.17096
chrX	162766920	162767458	HYPO42503	0.404464	0.0666667	0.337798	0	0.275
chrX	166418934	166419058	HYPO42543	0.727765	0.154762	0.573003	0.488089	0.507275
chrY	1799151	1801383	HYPO42562	0.552198	0.227938	0.324259	0.260877	0.261111
