# Supplementary material for: Constitutive loss of DNMT3A causes morbid obesity through misregulation of adipogenesis
Source: eLife. 2022 May 30;11:e72359. doi: 10.7554/eLife.72359 (PMC9150890; doi:10.7554/eLife.72359)
Supplement: Figure 8—source data 2. [file elife-72359-fig8-data2.xlsx]

## Sheet: 201215_adipo_dmra_hyper
chrom	start	end	locus_id	WT_8w	WT_1y	signal.diff	HET_8w	HET_1y
chr1	12862114	12862338	HYPO60	0.265224	0.655024	-0.389799	0.28767	0.478276
chr1	14579976	14580548	HYPO83	0.21844	0.551631	-0.333191	0.513609	0.515503
chr1	17592757	17592905	HYPO101	0.203598	0.59291	-0.389312	0.442891	0.429894
chr1	24618783	24621484	HYPO152_HYPO150	0.018624	0.43184	-0.413216	0.013333	0.495833
chr1	25245976	25246501	HYPO157	0.252535	0.574235	-0.3217	0.551629	0.452483
chr1	34195814	34196265	HYPO188	0.198362	0.50259	-0.304228	0.100198	0.377055
chr1	34224058	34225141	HYPO190	0.180298	0.517705	-0.337407	0.282907	0.242723
chr1	34519633	34519904	HYPO197	0.076923	0.421428	-0.344506	0.25	0.165385
chr1	34862967	34863339	HYPO213	0.160019	0.601703	-0.441684	0.430678	0.186504
chr1	36087061	36087625	HYPO224	0.119091	0.426214	-0.307123	0.33631	0.146401
chr1	36312789	36312952	HYPO230	0.189279	0.648869	-0.45959	0.119048	0.222804
chr1	36549312	36549633	HYPO241	0.0555556	0.500808	-0.445253	0.279538	0.191325
chr1	36646208	36646596	HYPO248	0.170106	0.547222	-0.377116	0.270911	0.223304
chr1	37575001	37575822	HYPO268	0.196481	0.579113	-0.382631	0.273514	0.380401
chr1	38275085	38275296	HYPO279	0.248162	0.644784	-0.396622	0.278396	0.147653
chr1	38318984	38319544	HYPO280	0.321387	0.631468	-0.310082	0.283333	0.385425
chr1	39744259	39744516	HYPO310	0.165232	0.552335	-0.387103	0.45847	0.281516
chr1	39788422	39788659	HYPO313	0.17004	0.568143	-0.398103	0.291204	0.121434
chr1	39815133	39815564	HYPO315	0.218662	0.550471	-0.331809	0.479252	0.247804
chr1	40018975	40019331	HYPO327	0.202723	0.55069	-0.347966	0.312843	0.386121
chr1	40025987	40026045	HYPO328	0.128889	0.589477	-0.460589	0.186905	0.186422
chr1	40228788	40229192	HYPO332	0.124395	0.452462	-0.328067	0.266865	0.201103
chr1	40332036	40332311	HYPO336	0.231854	0.533289	-0.301436	0.337393	0.198227
chr1	43367812	43368357	HYPO379	0.207098	0.594375	-0.387278	0.336219	0.181702
chr1	43559758	43560192	HYPO382	0.200582	0.505038	-0.304456	0.269841	0.385034
chr1	45411945	45412942	HYPO396	0.270869	0.605345	-0.334476	0.371139	0.379341
chr1	51324017	51324505	HYPO414	0.178547	0.593582	-0.415035	0.171667	0.233471
chr1	51979851	51979998	HYPO427	0.244101	0.585327	-0.341225	0.22805	0.314505
chr1	52206778	52207257	HYPO432	0.241295	0.593145	-0.35185	0.183373	0.287307
chr1	54859410	54860105	HYPO458	0.201685	0.551106	-0.349421	0.271337	0.367189
chr1	55920390	55920688	HYPO476	0.147485	0.615215	-0.46773	0.310065	0.355097
chr1	57909732	57910066	HYPO490	0.1	0.400303	-0.300303	0.165	0.487912
chr1	59326973	59327110	HYPO528	0.259024	0.645746	-0.386721	0.470455	0.194494
chr1	59433075	59433304	HYPO533	0.181169	0.566982	-0.385814	0.417403	0.15314
chr1	60792191	60792303	HYPO556	0.180632	0.503627	-0.322995	0.142222	0.174876
chr1	62897867	62898582	HYPO581	0.250603	0.593254	-0.342651	0.412018	0.465529
chr1	64421089	64421580	HYPO614	0.122753	0.494289	-0.371535	0.136607	0.413675
chr1	64459261	64459608	HYPO615	0.254763	0.55773	-0.302967	0.28478	0.227457
chr1	64661824	64662252	HYPO620	0.19996	0.691044	-0.491084	0.276064	0.531432
chr1	71553876	71554160	HYPO662	0.239344	0.639763	-0.400419	0.259821	0.213476
chr1	71586932	71587464	HYPO663	0.303478	0.650899	-0.347421	0.556548	0.455011
chr1	71853460	71854455	HYPO668	0.281451	0.616883	-0.335432	0.32343	0.441305
chr1	71891650	71891822	HYPO669	0.281401	0.707552	-0.426151	0.401339	0.219121
chr1	71942777	71943362	HYPO672	0.176199	0.504734	-0.328535	0.352468	0.206371
chr1	73979425	73979842	HYPO713	0.193915	0.551398	-0.357483	0.316667	0.289557
chr1	73994181	73994785	HYPO715	0.157799	0.510736	-0.352937	0.240227	0.321159
chr1	74004143	74005379	HYPO717	0.247125	0.558683	-0.311559	0.468475	0.375403
chr1	74137185	74138098	HYPO734	0.329302	0.668568	-0.339266	0.459975	0.345951
chr1	74345604	74346271	HYPO744	0.158069	0.502849	-0.34478	0.15386	0.136537
chr1	76109639	76110125	HYPO829	0.20731	0.512564	-0.305254	0.261282	0.292263
chr1	76279825	76280475	HYPO831	0.265346	0.724811	-0.459465	0.277718	0.192646
chr1	76862801	76863474	HYPO833	0.228906	0.594785	-0.365879	0.421693	0.341827
chr1	78816817	78817001	HYPO860	0.253435	0.651397	-0.397962	0.483333	0.380273
chr1	78817642	78817930	HYPO861	0.174206	0.610348	-0.436142	0.304633	0.18232
chr1	79914250	79914717	HYPO875	0.140842	0.480881	-0.34004	0.217249	0.172136
chr1	80705374	80706471	HYPO878	0.230553	0.567847	-0.337294	0.454766	0.294074
chr1	80706800	80707631	HYPO879	0.265333	0.579165	-0.313831	0.411259	0.25015
chr1	82355616	82356187	HYPO890	0.243973	0.689612	-0.445639	0.440344	0.199143
chr1	83447745	83448067	HYPO905	0.198918	0.566555	-0.367638	0.368671	0.418842
chr1	84878148	84878695	HYPO917	0.202178	0.514881	-0.312703	0.417857	0.43782
chr1	88317625	88317910	HYPO945	0.227083	0.573201	-0.346117	0.246428	0.142445
chr1	88529238	88529770	HYPO961	0.15101	0.619589	-0.468579	0.215476	0.288889
chr1	88932030	88932968	HYPO966	0.206916	0.52868	-0.321764	0.338945	0.36452
chr1	90353463	90353701	HYPO1003	0.151515	0.534512	-0.382997	0.125	0.425
chr1	90757656	90758232	HYPO1008	0.124914	0.459361	-0.334448	0.186201	0.184916
chr1	90998621	90998753	HYPO1014	0.1875	0.694445	-0.506945	NA	0.516081
chr1	91032598	91033075	HYPO1015	0.10109	0.474588	-0.373498	0.155366	0.0761784
chr1	91425397	91425793	HYPO1023	0.244164	0.622349	-0.378185	0.445069	0.344643
chr1	91553245	91553733	HYPO1028	0.274237	0.57561	-0.301373	0.384062	0.231289
chr1	92035973	92036476	HYPO1038	0.123333	0.446881	-0.323548	0.25	0.317381
chr1	92305190	92305991	HYPO1045	0.239268	0.603607	-0.36434	0.372887	0.552041
chr1	92401019	92401501	HYPO1048	0.255157	0.615377	-0.36022	0.456935	0.367623
chr1	92646814	92647179	HYPO1055	0.22887	0.600086	-0.371216	0.242981	0.4353
chr1	94744295	94744582	HYPO1124	0.151515	0.548543	-0.397028	0.532381	0.29217
chr1	94948017	94948059	HYPO1133	0.2	0.5	-0.3	1	NA
chr1	95591584	95592213	HYPO1154	0.275264	0.648266	-0.373002	0.108681	0.341772
chr1	95905538	95905719	HYPO1161	0.253335	0.616196	-0.36286	0.557619	0.84607
chr1	99807583	99807808	HYPO1172	0.21662	0.609785	-0.393165	0.583875	0.477118
chr1	107254468	107254595	HYPO1183	0.095238	0.436508	-0.34127	0.1	0.188095
chr1	107709975	107710582	HYPO1186_HYPO1125	0.215238	0.576484	-0.361247	0.348909	0.309674
chr1	120832095	120833076	HYPO1234	0.295432	0.656871	-0.361439	0.340238	0.353198
chr1	120851492	120852037	HYPO1235	0.102626	0.545	-0.442374	0.310476	0.359398
chr1	120898515	120898620	HYPO1237	0.187619	0.634444	-0.446825	0.642479	0.384545
chr1	121049180	121049540	HYPO1247	0.199008	0.725223	-0.526215	0.784286	0.554757
chr1	122691934	122692306	HYPO1298	0.222129	0.562303	-0.340174	0.445574	0.463781
chr1	122860479	122860960	HYPO1299_HYPO1225	0.0854058	0.430108	-0.344703	0.156015	0.0827374
chr1	127404677	127405426	HYPO1317	0.359864	0.698352	-0.338488	0.311721	0.518341
chr1	129277431	129277651	HYPO1335	0.2027	0.673759	-0.471059	0.175304	0.223722
chr1	129339478	129339802	HYPO1336_HYPO1258	0.194048	0.507639	-0.313591	0.329166	0.282576
chr1	130448474	130448874	HYPO1351	0.261004	0.637427	-0.376423	0.405952	0.332323
chr1	132900102	132900191	HYPO1370	0.182749	0.607448	-0.4247	0.392857	0.277573
chr1	134230109	134232482	HYPO1425	0.16679	0.510259	-0.343469	0.330681	0.167843
chr1	134234415	134234978	HYPO1426	0.182292	0.511458	-0.329167	0.234323	0.393081
chr1	134273635	134273992	HYPO1430	0.171562	0.531385	-0.359824	0.16627	0.397766
chr1	134285223	134285882	HYPO1432	0.16923	0.634019	-0.464789	0.423491	0.412977
chr1	134328367	134328654	HYPO1435	0.179466	0.573736	-0.394271	0.291342	0.287856
chr1	134968188	134968564	HYPO1464	0.217983	0.664679	-0.446696	0.313961	0.232823
chr1	134974698	134974900	HYPO1466	0.187118	0.536364	-0.349245	0.482143	0.19371
chr1	135106205	135106978	HYPO1475	0.187383	0.494312	-0.306929	0.275309	0.336887
chr1	135155041	135155264	HYPO1480	0.183571	0.637522	-0.45395	0.5	0.377186
chr1	135367425	135367848	HYPO1497	0.231706	0.540923	-0.309216	0.210813	0.0821869
chr1	135382900	135383258	HYPO1498	0.211376	0.552778	-0.341402	0.259375	0.146577
chr1	135632851	135632970	HYPO1502	0.223166	0.564038	-0.340872	0.285714	0.201105
chr1	135663457	135663979	HYPO1504	0.311925	0.649405	-0.337479	0.330357	0.289216
chr1	135767884	135768139	HYPO1509	0.192958	0.504153	-0.311196	0.262476	0.269154
chr1	135983357	135983909	HYPO1525	0.295066	0.618793	-0.323728	0.2679	0.170896
chr1	136579082	136579409	HYPO1553	0.244205	0.566332	-0.322126	0.536143	0.564964
chr1	137055002	137055232	HYPO1574	0.279581	0.71905	-0.439468	0.389178	0.477466
chr1	137220918	137221477	HYPO1581	0.062933	0.407227	-0.344294	0.157002	0.146925
chr1	137277135	137277422	HYPO1584	0.226441	0.535549	-0.309108	0.241138	0.233617
chr1	137439471	137440439	HYPO1590	0.19921	0.506293	-0.307083	0.363348	0.270562
chr1	137477415	137477765	HYPO1594	0.0928572	0.604762	-0.511905	0.306364	0.260766
chr1	137479844	137481189	HYPO1595	0.223024	0.546753	-0.323729	0.251715	0.194496
chr1	137565686	137566022	HYPO1600	0.168734	0.47718	-0.308446	0.366213	0.308869
chr1	137758560	137759110	HYPO1621	0.178553	0.504855	-0.326301	0.301029	0.28551
chr1	138466292	138466460	HYPO1649	0.142308	0.696429	-0.554121	0.23226	0.270695
chr1	140878577	140880342	HYPO1690	0.223017	0.524363	-0.301346	0.191407	0.204936
chr1	141275704	141276326	HYPO1691	0.127778	0.42798	-0.300202	0.379113	0.22178
chr1	152382978	152383788	HYPO1715	0.295433	0.606833	-0.3114	0.271154	0.117033
chr1	152528134	152528563	HYPO1716	0.219688	0.53185	-0.312162	0.462859	0.490994
chr1	152720321	152720657	HYPO1717	0.137081	0.466985	-0.329904	0.228704	0.144186
chr1	152725643	152725854	HYPO1718	0.198026	0.612133	-0.414107	0.382243	0.24095
chr1	153443426	153443870	HYPO1735	0.266802	0.685471	-0.418669	0.499594	0.572813
chr1	153509992	153510363	HYPO1737	0.15726	0.585556	-0.428296	0.372698	0.216935
chr1	153539939	153540551	HYPO1740	0.216568	0.555489	-0.338922	0.288059	0.296331
chr1	153557666	153558213	HYPO1742	0.0728715	0.490909	-0.418037	0.229365	0.267681
chr1	153898919	153899191	HYPO1747	0.188059	0.610401	-0.422342	0.188811	0.265313
chr1	154403353	154404536	HYPO1759	0.135222	0.508244	-0.373023	0.179936	0.191017
chr1	154436612	154437036	HYPO1762	0.134099	0.57168	-0.437581	0.305225	0.143362
chr1	154455915	154456214	HYPO1766	0.0694445	0.476007	-0.406563	0.252381	0.241342
chr1	154524805	154525340	HYPO1772	0.234887	0.573684	-0.338797	0.27914	0.277446
chr1	154656841	154657269	HYPO1778	0.135846	0.543898	-0.408052	0.155844	0.184238
chr1	154662625	154662904	HYPO1779	0.177143	0.493939	-0.316797	0.285714	0.433069
chr1	155112199	155112922	HYPO1791	0.205376	0.620967	-0.415591	0.253816	0.31566
chr1	155913075	155913490	HYPO1820	0.193648	0.702397	-0.508749	0.454034	0.21982
chr1	155950021	155950514	HYPO1821	0.149567	0.50536	-0.355793	0.244356	0.179171
chr1	156940746	156941043	HYPO1844	0.0733334	0.538889	-0.465556	0.0222222	0.112944
chr1	157958942	157959228	HYPO1868	0.204706	0.649282	-0.444576	0.379063	0.200382
chr1	158110039	158110377	HYPO1870	0.195721	0.623266	-0.427545	0.228488	0.272854
chr1	158152744	158153104	HYPO1874	0.287988	0.607602	-0.319614	0.311576	0.380375
chr1	158160565	158161106	HYPO1876	0.129412	0.473077	-0.343665	0.269192	0.107143
chr1	160783346	160783591	HYPO1919	0.196296	0.629702	-0.433406	0.463027	0.780916
chr1	161853064	161853421	HYPO1935	0.0770054	0.523361	-0.446356	0.322399	0.329167
chr1	163913867	163914720	HYPO1966	0.245791	0.551964	-0.306173	0.316746	0.244001
chr1	163938746	163939220	HYPO1968	0.160472	0.463463	-0.302991	0.227385	0.170949
chr1	164114102	164114816	HYPO1973	0.156148	0.525709	-0.369562	0.124327	0.211028
chr1	164788150	164788285	HYPO1987	0.203333	0.516667	-0.313333	0.5	0.467064
chr1	164789016	164790350	HYPO1988	0.252105	0.572751	-0.320646	0.462541	0.357493
chr1	165056524	165057042	HYPO1994	0.298462	0.633819	-0.335358	0.499825	0.576095
chr1	165310247	165310803	HYPO1999	0.130709	0.550972	-0.420263	0.0992062	0.135618
chr1	165537673	165538365	HYPO2002	0.167354	0.716703	-0.549349	0.41415	0.400736
chr1	165823749	165824093	HYPO2004	0.265035	0.608162	-0.343126	0.559034	0.6243
chr1	166700666	166700984	HYPO2020	0.271767	0.644339	-0.372572	0.360317	0.355984
chr1	166827128	166827407	HYPO2021	0.142857	0.6625	-0.519643	0.625	0.335554
chr1	166976435	166977154	HYPO2024	0.150722	0.520875	-0.370153	0.186508	0.19916
chr1	167546864	167547620	HYPO2038	0.204686	0.520545	-0.315859	0.306371	0.163855
chr1	167678210	167678418	HYPO2048	0.186539	0.499681	-0.313142	0.256341	0.204387
chr1	168227296	168227452	HYPO2067	0.169576	0.572262	-0.402685	0.155944	0.239409
chr1	169428715	169429323	HYPO2096	0.296183	0.608417	-0.312233	0.48745	0.471982
chr1	169548492	169548696	HYPO2099	0.219742	0.575376	-0.355634	0.389133	0.318615
chr1	169633519	169633710	HYPO2110	0.187568	0.68545	-0.497882	0.381945	0.353466
chr1	170002052	170002583	HYPO2118	0.213283	0.539841	-0.326558	0.412024	0.412428
chr1	171846660	171847042	HYPO2137	0.170288	0.482601	-0.312313	0.270988	0.339651
chr1	172037940	172038328	HYPO2144	0.218192	0.681683	-0.463491	0.354058	0.548651
chr1	172118713	172119028	HYPO2149	0.179167	0.586135	-0.406968	0.470397	0.145628
chr1	172624689	172625432	HYPO2156	0.244408	0.556944	-0.312537	0.474748	0.410206
chr1	173119219	173119762	HYPO2185	0.127874	0.474804	-0.34693	0.422222	0.168286
chr1	174482927	174483593	HYPO2251	0.223571	0.702857	-0.479286	0.23	0.458076
chr1	180730293	180730504	HYPO2313	0.30205	0.625691	-0.323641	0.548052	0.74401
chr1	182204934	182205188	HYPO2337	0.231036	0.641809	-0.410772	0.431547	0.267313
chr1	182216287	182216963	HYPO2339	0.213685	0.536486	-0.322801	0.347063	0.469478
chr1	182332698	182333062	HYPO2347	0.0863096	0.427381	-0.341071	0.302366	0.217937
chr1	183350225	183350559	HYPO2392	0.264646	0.57096	-0.306313	0.26	0.15045
chr1	184033587	184034033	HYPO2408	0.292505	0.665733	-0.373228	0.501692	0.401064
chr1	184040888	184041381	HYPO2410	0.168308	0.517683	-0.349375	0.255956	0.454934
chr1	184044467	184044656	HYPO2411	0.15888	0.483578	-0.324698	0.375541	0.242767
chr1	184157281	184158055	HYPO2416	0.174983	0.48356	-0.308577	0.34881	0.183128
chr1	184424561	184425264	HYPO2424	0.203646	0.640999	-0.437353	0.293733	0.157858
chr1	184427035	184427296	HYPO2425	0.197151	0.657432	-0.460281	0.510101	0.338869
chr1	184429512	184429952	HYPO2426	0.111111	0.494455	-0.383344	0.281838	0.278025
chr1	184605553	184605778	HYPO2437	0.217016	0.579167	-0.36215	0.582281	0.279305
chr1	184770082	184770616	HYPO2441	0.185096	0.489092	-0.303996	0.30754	0.264284
chr1	186263039	186263628	HYPO2455	0.177273	0.540103	-0.36283	0.173714	0.280423
chr1	186273003	186273290	HYPO2458	0.214243	0.644553	-0.43031	0.602368	0.444603
chr1	186554642	186554729	HYPO2465	0.126587	0.619048	-0.492461	0.419813	0.0722222
chr1	186606049	186606348	HYPO2472	0.24548	0.597777	-0.352297	0.226127	0.214593
chr1	186646729	186646875	HYPO2477	0.215999	0.611336	-0.395337	0.571591	0.389833
chr1	187788378	187788610	HYPO2501	0.205851	0.526923	-0.321072	0.367399	0.356147
chr1	188237171	188237761	HYPO2508	0.142093	0.686179	-0.544086	0.416742	0.257953
chr1	188410823	188411285	HYPO2512	0.137162	0.462854	-0.325692	0.514682	0.465232
chr1	188506592	188506832	HYPO2514	0.161237	0.533495	-0.372258	0.222751	0.329319
chr1	189049940	189050726	HYPO2522	0.303596	0.625814	-0.322218	0.332505	0.212614
chr1	189560508	189560772	HYPO2527	0.265834	0.659091	-0.393257	0.348611	0.258347
chr1	190899670	190899763	HYPO2538	0.192963	0.49742	-0.304457	0.474964	0.285198
chr1	191703872	191704312	HYPO2551	0.160935	0.613212	-0.452277	0.383014	0.293192
chr1	191734800	191735168	HYPO2552	0.206391	0.702651	-0.496261	0.518707	0.405335
chr1	192916115	192916596	HYPO2576	0.310493	0.629018	-0.318526	0.333333	0.247074
chr1	192931101	192931488	HYPO2578	0.208673	0.530303	-0.32163	0.265476	0.144429
chr1	193319148	193319595	HYPO2596	0.164137	0.561082	-0.396944	0.157143	0.363607
chr1	193770025	193770605	HYPO2605	0.229773	0.574595	-0.344821	0.433016	0.265163
chr1	194648726	194649510	HYPO2620	0.134329	0.513709	-0.379379	0.20053	0.168247
chr1	194916818	194916965	HYPO2625	0.290729	0.78443	-0.493701	0.664147	0.662128
chr10	3085823	3086146	HYPO2655	0.168651	0.549254	-0.380603	0.26996	0.15889
chr10	5863950	5864572	HYPO2685	0.155804	0.473114	-0.31731	0.474931	0.315779
chr10	5991694	5991836	HYPO2689	0.244584	0.736255	-0.491672	0.473052	0.45095
chr10	6235214	6235332	HYPO2698	0.183031	0.658297	-0.475266	0.531784	0.120993
chr10	8476929	8478452	HYPO2734	0.287143	0.669893	-0.382749	0.643275	0.376793
chr10	8630251	8630650	HYPO2740	0.267596	0.593635	-0.326039	0.332961	0.144938
chr10	9586697	9587059	HYPO2747	0.264395	0.684206	-0.419811	0.498864	0.325979
chr10	10373929	10374155	HYPO2755	0.244883	0.668923	-0.42404	0.214059	0.380751
chr10	13046048	13046260	HYPO2784	0.208478	0.605423	-0.396946	0.176094	0.446093
chr10	13557742	13557812	HYPO2796	0.238034	0.635257	-0.397222	0.380134	0.499475
chr10	16714299	16714550	HYPO2812	0.112925	0.462579	-0.349653	0.149411	0.141612
chr10	17319053	17319389	HYPO2818	0.270593	0.630403	-0.35981	0.689484	0.492878
chr10	17859155	17859284	HYPO2826	0.15	0.552273	-0.402273	0.57294	0.679546
chr10	18147725	18148012	HYPO2834	0.272193	0.664585	-0.392393	0.419048	0.298869
chr10	18846451	18846948	HYPO2847	0.240286	0.758695	-0.51841	0.318894	0.364278
chr10	20206326	20206901	HYPO2876	0.238393	0.56757	-0.329177	0.389729	0.30209
chr10	20864671	20865278	HYPO2883	0.119179	0.423841	-0.304662	0.309153	0.133366
chr10	21348283	21348949	HYPO2889	0.207961	0.574052	-0.366091	0.257912	0.403437
chr10	21718530	21718872	HYPO2898	0.327386	0.757639	-0.430253	0.414204	0.469183
chr10	21720486	21720984	HYPO2899	0.311648	0.754163	-0.442515	0.357143	0.344789
chr10	24354153	24354454	HYPO2954	0.148776	0.508256	-0.35948	0.362963	0.395266
chr10	24831368	24832180	HYPO2965	0.210757	0.532415	-0.321658	0.299639	0.238827
chr10	24859912	24860243	HYPO2967	0.146825	0.493308	-0.346483	0.391667	0.147691
chr10	25089581	25089792	HYPO2974	0.202778	0.761902	-0.559124	0.626263	0.587061
chr10	25105690	25106154	HYPO2976	0.216503	0.532568	-0.316066	0.339759	0.382732
chr10	25151825	25152584	HYPO2980	0.187569	0.584016	-0.396448	0.287144	0.262564
chr10	25427725	25428223	HYPO2984	0.245227	0.679576	-0.434349	0.392262	0.298841
chr10	25629695	25630274	HYPO2985	0.145918	0.477522	-0.331604	0.545552	0.338546
chr10	27832971	27833908	HYPO3000	0.201925	0.526124	-0.3242	0.175248	0.366712
chr10	31090030	31090198	HYPO3018	0	0.332071	-0.332071	0.220139	0.0799783
chr10	36767159	36767939	HYPO3040	0.0901795	0.477026	-0.386846	0.314014	0.216581
chr10	37120031	37120708	HYPO3045	0.0838204	0.42045	-0.336629	0.121429	0.174512
chr10	38628135	38628519	HYPO3048	0.252815	0.553614	-0.300799	0.342532	0.14953
chr10	39229724	39230230	HYPO3065	0.256376	0.57346	-0.317084	0.231047	0.318692
chr10	40357860	40357975	HYPO3085	0.188889	0.514957	-0.326068	0.430555	0.0672222
chr10	40433010	40433383	HYPO3088	0.123759	0.430905	-0.307145	0.220418	0.161553
chr10	40456873	40457489	HYPO3089	0.173149	0.570088	-0.396939	0.364205	0.395467
chr10	41923725	41924410	HYPO3122	0.228753	0.580751	-0.351999	0.359367	0.244533
chr10	41931295	41931813	HYPO3124	0.246293	0.556147	-0.309855	0.40456	0.424395
chr10	42066146	42066675	HYPO3133	0.251705	0.695562	-0.443857	0.597854	0.49682
chr10	43387206	43387333	HYPO3166	0.203102	0.55622	-0.353118	0.664286	0.457359
chr10	44147774	44147992	HYPO3179	0.230952	0.572357	-0.341404	0.573082	0.397077
chr10	53181818	53183000	HYPO3237	0.208736	0.584856	-0.37612	0.320306	0.401612
chr10	53238947	53239569	HYPO3239	0.25145	0.55799	-0.30654	0.199681	0.220983
chr10	56301698	56302139	HYPO3258	0.126013	0.476616	-0.350603	0.135714	0.223272
chr10	56640573	56641656	HYPO3260	0.119234	0.499781	-0.380547	0.187089	0.131864
chr10	58407519	58408007	HYPO3288	0.202721	0.542697	-0.339976	0.445527	0.412485
chr10	58704856	58705299	HYPO3291	0.216832	0.526191	-0.309359	0.55369	0.377229
chr10	59262767	59263296	HYPO3302	0.174107	0.562761	-0.388654	0.456548	0.345774
chr10	59382318	59382802	HYPO3309	0.125303	0.442826	-0.317523	0.0673895	0.10832
chr10	60282135	60282373	HYPO3359	0.244246	0.592857	-0.348611	0.290909	0.159858
chr10	60637874	60638132	HYPO3382	0.136154	0.482855	-0.346701	0.46373	0.29376
chr10	60775352	60775873	HYPO3393	0.27718	0.644012	-0.366831	0.269457	0.488567
chr10	60820509	60820768	HYPO3395	0.130555	0.623162	-0.492606	0.248316	0.174284
chr10	60825672	60826059	HYPO3396	0.25481	0.728307	-0.473497	0.523016	0.371543
chr10	60833069	60833334	HYPO3397	0.254269	0.66158	-0.407312	0.394587	0.202986
chr10	61328752	61329151	HYPO3420	0.201435	0.646089	-0.444654	0.543056	0.438229
chr10	61486627	61487258	HYPO3429	0.131553	0.507257	-0.375705	0.360635	0.263109
chr10	62520035	62520495	HYPO3471	0.195119	0.646123	-0.451004	0.300729	0.26994
chr10	63440948	63441446	HYPO3485	0.275656	0.625491	-0.349835	0.398016	0.211791
chr10	67299235	67299568	HYPO3527	0.218257	0.658366	-0.440109	0.309842	0.571087
chr10	67569601	67570080	HYPO3537	0.298753	0.711116	-0.412363	0.344697	0.440826
chr10	67589866	67591706	HYPO3538	0.193494	0.527266	-0.333772	0.289478	0.326211
chr10	67671050	67671731	HYPO3545	0.222163	0.536022	-0.31386	0.282211	0.0531565
chr10	68507094	68507357	HYPO3559	0.2772	0.615404	-0.338204	0.545465	0.28677
chr10	69351137	69351515	HYPO3597	0.174874	0.476656	-0.301782	0.412037	0.236443
chr10	69611970	69612169	HYPO3608	0.119318	0.424709	-0.305391	0.198359	0.141481
chr10	69645791	69646805	HYPO3609_HYPO3342	0.164765	0.514827	-0.350062	0.264464	0.265373
chr10	70277206	70277880	HYPO3618	0.25166	0.563208	-0.311548	0.321624	0.261681
chr10	70431554	70432150	HYPO3620	0.272379	0.634993	-0.362613	0.441775	0.291421
chr10	70524919	70525258	HYPO3623	0.145942	0.471885	-0.325943	0.325519	0.22201
chr10	70577320	70577522	HYPO3624	0.146032	0.5666	-0.420569	0.283605	0.404951
chr10	70656033	70656136	HYPO3627	0.143182	0.52	-0.376818	0.467857	0.350446
chr10	72095070	72095735	HYPO3643	0.220128	0.532355	-0.312227	0.360119	0.145486
chr10	74458280	74458609	HYPO3379_HYPO3653	0.194775	0.546154	-0.351379	0.513333	0.146964
chr10	74526210	74526516	HYPO3658	0.205913	0.510116	-0.304202	0.444084	0.410163
chr10	74567121	74567672	HYPO3660	0.111466	0.565873	-0.454407	0.0295139	0.146304
chr10	74907789	74908032	HYPO3668	0.265383	0.754167	-0.488784	0.642172	0.247571
chr10	74918935	74919530	HYPO3671	0.0985609	0.474472	-0.375911	0.316267	0.250701
chr10	75058795	75059112	HYPO3679	0.183472	0.584663	-0.401191	0.40522	0.300941
chr10	75393830	75394077	HYPO3699	0.233071	0.552183	-0.319112	0.157143	0.191627
chr10	76162563	76162909	HYPO3719	0.261667	0.587193	-0.325526	0.452381	0.442712
chr10	76336787	76337098	HYPO3725	0.175973	0.514952	-0.338979	0.176527	0.187725
chr10	76368714	76368839	HYPO3727	0.175084	0.643963	-0.468879	0.277421	0.308722
chr10	76663240	76663537	HYPO3739	0.103187	0.608225	-0.505038	0.407778	0.297253
chr10	76669454	76670236	HYPO3740	0.194066	0.495284	-0.301219	0.234994	0.301587
chr10	76706507	76706927	HYPO3744	0.258135	0.632405	-0.374271	0.477435	0.308714
chr10	76918105	76918537	HYPO3751	0.164966	0.497857	-0.332891	0.350737	0.402705
chr10	79264984	79265506	HYPO3844	0.197809	0.533951	-0.336141	0.184722	0.191468
chr10	79285159	79285283	HYPO3847	0.107143	0.623413	-0.51627	0.297619	0.255103
chr10	79395445	79395757	HYPO3865	0.0490741	0.418687	-0.369613	0	0.0579594
chr10	79547669	79547991	HYPO3883	0.25873	0.678141	-0.41941	0.328571	0.125045
chr10	79619026	79619160	HYPO3890	0	0.515873	-0.515873	0.494286	0.465717
chr10	80047072	80047459	HYPO3956	0.285795	0.698062	-0.412266	0.498469	0.346905
chr10	80826618	80828449	HYPO4055_HYPO3749_HYPO3750	0.182436	0.496498	-0.314062	0.347519	0.20082
chr10	80864333	80865308	HYPO4060_HYPO3755	0.103571	0.429464	-0.325893	0.304365	0.152018
chr10	80865770	80866079	HYPO4061	0.177778	0.625	-0.447222	0.4	0.339286
chr10	80975034	80975161	HYPO4085	0.025	0.407143	-0.382143	0.328704	0.161399
chr10	81326379	81327426	HYPO3803_HYPO4106	0.166667	0.486111	-0.319445	0.416667	0.209248
chr10	82482730	82482874	HYPO4134	0.286742	0.696085	-0.409343	0.198512	0.244798
chr10	82532411	82532840	HYPO4135	0.188131	0.532318	-0.344187	0.288889	0.274978
chr10	83174625	83175109	HYPO4150	0.244114	0.574531	-0.330417	0.34222	0.536254
chr10	83188870	83189067	HYPO4152	0.183783	0.550132	-0.366349	0.282035	0.314216
chr10	85794515	85795147	HYPO4206	0.161141	0.47819	-0.317048	0.203463	0.153155
chr10	87026729	87026841	HYPO4226	0.128571	0.750201	-0.62163	0.405714	0.378086
chr10	87389981	87390479	HYPO4232	0.0817848	0.402037	-0.320252	0.15771	0.134651
chr10	87765850	87766145	HYPO4235	0.225818	0.674553	-0.448735	0.370505	0.412955
chr10	88996334	88996556	HYPO4256	0.267244	0.594112	-0.326868	0.615741	0.301403
chr10	92754216	92754808	HYPO4304_HYPO3999	0.0769445	0.379982	-0.303037	0.327208	0.232681
chr10	93262449	93263187	HYPO4326	0.246365	0.554632	-0.308267	0.343463	0.312372
chr10	93693340	93693480	HYPO4338	0.199176	0.660922	-0.461746	0.51532	0.44426
chr10	93813798	93814303	HYPO4343	0.230563	0.543235	-0.312673	0.585952	0.256194
chr10	93942820	93943078	HYPO4351	0.138889	0.55	-0.411111	0	0.288034
chr10	93943480	93943870	HYPO4352	0.135828	0.44436	-0.308533	0.327994	0.063492
chr10	93957300	93957718	HYPO4353	0.0801623	0.460355	-0.380193	0.225871	0.218389
chr10	93968084	93968806	HYPO4354	0.134441	0.581306	-0.446865	0.288719	0.220939
chr10	94030720	94030952	HYPO4359	0.221281	0.570778	-0.349496	0.585645	0.249154
chr10	94466444	94467417	HYPO4370	0.268423	0.575805	-0.307382	0.435266	0.141574
chr10	94654483	94654957	HYPO4376	0.114265	0.451745	-0.33748	0.161646	0.161526
chr10	94680722	94681152	HYPO4379	0.180614	0.498649	-0.318035	0.211541	0.197123
chr10	94780463	94781378	HYPO4383	0.270465	0.613031	-0.342566	0.298148	0.318627
chr10	95653095	95653495	HYPO4406	0.265757	0.738226	-0.472468	0.481481	0.520337
chr10	95943044	95943271	HYPO4412	0.157879	0.601345	-0.443466	0.248333	0.045
chr10	96946660	96947973	HYPO4418	0.228364	0.547626	-0.319262	0.620503	0.427332
chr10	98081825	98082206	HYPO4423	0.314014	0.614994	-0.30098	0.514286	0.411638
chr10	98671839	98672337	HYPO4436	0.207675	0.524481	-0.316806	0.247983	0.502878
chr10	99149628	99150131	HYPO4455	0.12	0.618012	-0.498012	0.108566	0.353032
chr10	99495381	99495701	HYPO4460	0.177443	0.499853	-0.32241	0.327381	0.470125
chr10	107377353	107377673	HYPO4498	0.245364	0.579308	-0.333944	0.463272	0.256481
chr10	107550178	107550860	HYPO4500	0.194536	0.54882	-0.354284	0.500413	0.266033
chr10	109366297	109366529	HYPO4514	0.226671	0.585461	-0.358789	0.364286	0.569248
chr10	111102906	111103051	HYPO4550	0.249008	0.669697	-0.420689	0.488216	0.455655
chr10	111221049	111221408	HYPO4553	0.255494	0.767901	-0.512407	0.335714	0.374249
chr10	116193207	116193422	HYPO4608	0.186642	0.615463	-0.428821	0.656548	0.356739
chr10	116211457	116211943	HYPO4610	0.197937	0.565741	-0.367804	0.269372	0.220298
chr10	116458183	116458420	HYPO4614	0.219269	0.585013	-0.365744	0.323809	0.201224
chr10	116640154	116640353	HYPO4624	0.298298	0.665502	-0.367204	0.521939	0.267751
chr10	116878515	116878881	HYPO4634	0.183095	0.488065	-0.304969	0.290793	0.342222
chr10	116954707	116954954	HYPO4637	0.239899	0.758333	-0.518434	0.342063	0.275865
chr10	117325941	117326201	HYPO4648	0.308447	0.617209	-0.308762	0.524761	0.385852
chr10	117384318	117384702	HYPO4653	0.279235	0.613853	-0.334618	0.342063	0.298758
chr10	117486319	117487034	HYPO4655	0.250223	0.561105	-0.310882	0.308576	0.340945
chr10	117832834	117833047	HYPO4663	0.291667	0.597673	-0.306007	0.370322	0.329913
chr10	118258056	118258310	HYPO4667	0.156203	0.487363	-0.331159	0.349231	0.130477
chr10	118438063	118438401	HYPO4669	0.267063	0.63335	-0.366287	0.493326	0.438898
chr10	118513242	118513621	HYPO4673	0.227565	0.600023	-0.372458	0.416868	0.16881
chr10	119679565	119680146	HYPO4695	0.19695	0.678079	-0.481129	0.42134	0.588458
chr10	119828475	119828637	HYPO4700	0.224432	0.769485	-0.545053	0.432921	0.267615
chr10	119838949	119839226	HYPO4701	0.171871	0.715073	-0.543202	0.11016	0.333726
chr10	119950021	119950510	HYPO4706	0.186751	0.542063	-0.355312	0.357143	0.161135
chr10	120008288	120008932	HYPO4709	0.127129	0.515804	-0.388676	0.314394	0.181699
chr10	120189047	120189317	HYPO4720	0.246647	0.592979	-0.346332	0.515266	0.316856
chr10	120665055	120665463	HYPO4741	0.281185	0.814692	-0.533507	0.332975	0.660132
chr10	120665514	120665771	HYPO4742	0.282143	0.720833	-0.43869	0.347619	0.697222
chr10	122238971	122239501	HYPO4789	0.154712	0.540504	-0.385791	0.390944	0.244865
chr10	122328515	122328905	HYPO4795	0.153799	0.496934	-0.343135	0.268056	0.294439
chr10	122530113	122530485	HYPO4804	0.246101	0.546302	-0.300201	0.436765	0.44638
chr10	125578829	125579437	HYPO4822	0.156727	0.577679	-0.420952	0.405952	0.604631
chr10	125959163	125959670	HYPO4825	0.181587	0.523718	-0.342131	0.175	0.222503
chr10	126371607	126371837	HYPO4834	0.21508	0.632155	-0.417075	0.519643	0.630323
chr10	126408534	126409394	HYPO4838	0.236356	0.619562	-0.383206	0.285526	0.168686
chr10	126528606	126529270	HYPO4852	0.199833	0.534016	-0.334184	0.265278	0.257076
chr10	126621100	126621276	HYPO4859	0.15	0.557143	-0.407143	0.1	0.173979
chr10	126723496	126724069	HYPO4866	0.231393	0.600309	-0.368915	0.511429	0.511059
chr10	127721218	127721371	HYPO4926	0	0.354166	-0.354166	0.025	0.273271
chr10	127945366	127945664	HYPO4940	0.286075	0.596071	-0.309996	0.585147	0.281482
chr11	3384129	3384520	HYPO4988	0.175248	0.532735	-0.357487	0.420181	0.18448
chr11	3931414	3931964	HYPO5014	0.218147	0.620768	-0.402621	0.386461	0.178715
chr11	4203116	4203406	HYPO5029	0.111111	0.479734	-0.368623	0.334756	0.143151
chr11	4880297	4880915	HYPO5054	0.0966667	0.477607	-0.38094	0.465278	0.288732
chr11	5079579	5079738	HYPO5068	0.205952	0.617865	-0.411913	0.213763	0.270897
chr11	5410249	5410749	HYPO5075	0.267467	0.723847	-0.456379	0.416667	0.357247
chr11	5820328	5820815	HYPO5093_HYPO4718	0.125649	0.459722	-0.334073	0.302721	0.203668
chr11	8479753	8480084	HYPO5141	0.148701	0.478788	-0.330087	0.273359	0.0814014
chr11	11926765	11926843	HYPO5166	0.3125	0.835245	-0.522745	0.796601	0.212416
chr11	17627520	17628054	HYPO5193	0.161159	0.464689	-0.30353	0.239019	0.151598
chr11	18991194	18991853	HYPO5207	0.255112	0.588149	-0.333037	0.524342	0.460176
chr11	19375219	19375835	HYPO5212	0.190643	0.54247	-0.351826	0.33961	0.142001
chr11	19911603	19911951	HYPO5228	0.186922	0.623944	-0.437022	0.283887	0.173613
chr11	19938822	19939097	HYPO5229	0.184097	0.494047	-0.309951	0.172863	0.193741
chr11	20247656	20247913	HYPO5236	0.16412	0.507667	-0.343548	0.463492	0.350625
chr11	20363492	20363686	HYPO5241	0.13	0.642857	-0.512857	0.8	0.263691
chr11	20758844	20760098	HYPO5254	0.166972	0.472751	-0.305779	0.215245	0.124958
chr11	20936249	20936828	HYPO5258	0.190224	0.594315	-0.404091	0.298701	0.131316
chr11	24596577	24597140	HYPO5310	0.215262	0.557197	-0.341934	0.369658	0.45333
chr11	25056964	25057431	HYPO5315	0.177818	0.508906	-0.331089	0.306818	0.181652
chr11	30111787	30112516	HYPO5347	0.21688	0.527203	-0.310322	0.299405	0.186865
chr11	30131357	30132739	HYPO5348	0.248259	0.690577	-0.442318	0.316713	0.249873
chr11	31671020	31671379	HYPO5367	0.30101	0.626781	-0.325771	0.500694	0.495603
chr11	31964188	31964735	HYPO5375	0.275238	0.674098	-0.39886	0.413393	0.281491
chr11	32242245	32242917	HYPO5391	0.27402	0.606187	-0.332168	0.415751	0.385806
chr11	32446472	32446946	HYPO5396	0.106746	0.45117	-0.344424	0.118326	0.281154
chr11	34025005	34025419	HYPO5438	0.172694	0.664006	-0.491312	0.238445	0.299377
chr11	34043445	34044178	HYPO5439	0.302249	0.666994	-0.364745	0.594875	0.821789
chr11	35400451	35400977	HYPO5456	0.220101	0.580874	-0.360773	0.436774	0.351793
chr11	43163097	43163541	HYPO5500	0.210418	0.51674	-0.306322	0.445933	0.434087
chr11	44343993	44344098	HYPO5526	0.10303	0.645788	-0.542758	0.470419	0.117448
chr11	44488886	44489215	HYPO5533	0.147489	0.515341	-0.367852	0.378696	0.143073
chr11	44776407	44776828	HYPO5542	0.316298	0.623877	-0.307579	0.400859	0.519224
chr11	44916936	44917252	HYPO5545	0.27525	0.668403	-0.393153	0.525949	0.432654
chr11	45079183	45079572	HYPO5546	0.311177	0.657527	-0.346351	0.449495	0.433235
chr11	45876613	45877400	HYPO5565	0.0583188	0.366998	-0.308679	0.11	0.20804
chr11	45883388	45883548	HYPO5568	0.239718	0.540669	-0.300951	0.170918	0.147169
chr11	49624540	49624851	HYPO5619	0.13658	0.497311	-0.360731	0.232904	0.489025
chr11	49962794	49963074	HYPO5630	0.130632	0.616738	-0.486106	0.229497	0.263942
chr11	50253315	50253672	HYPO5649	0.181493	0.563229	-0.381736	0.185387	0.47863
chr11	50435834	50436453	HYPO5652	0.231169	0.601009	-0.36984	0.265483	0.237062
chr11	50552877	50553202	HYPO5655	0.171588	0.474703	-0.303115	0.360084	0.375053
chr11	51694611	51694745	HYPO5690	0.235615	0.581352	-0.345737	0.355459	0.372086
chr11	53626737	53627349	HYPO5748	0.244868	0.557271	-0.312403	0.361804	0.330234
chr11	53632233	53632793	HYPO5749	0.0651515	0.384024	-0.318872	0.177273	0.199868
chr11	53873668	53874060	HYPO5759	0.220952	0.618749	-0.397797	0.420923	0.227722
chr11	53876084	53876387	HYPO5760	0.298588	0.611503	-0.312916	0.161667	0.154031
chr11	53885259	53886394	HYPO5762	0.204318	0.547614	-0.343296	0.340398	0.331123
chr11	54618661	54618986	HYPO5774	0.238086	0.563714	-0.325628	0.252863	0.330018
chr11	57014711	57015099	HYPO5819	0.321049	0.709126	-0.388077	0.656633	0.3781
chr11	57717701	57717981	HYPO5842	0.242582	0.548878	-0.306295	0.345125	0.156445
chr11	57797583	57797807	HYPO5846	0.266894	0.610235	-0.343341	0.287699	0.220491
chr11	58384017	58384382	HYPO5863	0.208211	0.515746	-0.307535	0.451852	0.338886
chr11	58823218	58824048	HYPO5882	0.319114	0.651213	-0.3321	0.526191	0.49753
chr11	59096521	59096804	HYPO5896	0.109722	0.472222	-0.3625	0.153409	0.253013
chr11	59448790	59449161	HYPO5910	0.220985	0.525589	-0.304604	0.413579	0.428022
chr11	61113948	61114574	HYPO5965_HYPO5542	0.138269	0.512987	-0.374718	0.483333	0.131028
chr11	63982204	63982611	HYPO6046	0.221599	0.565141	-0.343543	0.235544	0.232285
chr11	67337218	67337830	HYPO6094	0.134244	0.483889	-0.349645	0.256945	0.368141
chr11	67611574	67611902	HYPO6104	0.0376984	0.538712	-0.501014	0.15873	0.338424
chr11	68122733	68123015	HYPO6113	0.153061	0.542347	-0.389286	0.430688	0.300371
chr11	68192682	68193100	HYPO6115	0.247993	0.550285	-0.302292	0.354533	0.341865
chr11	69324398	69324773	HYPO6189	0.144242	0.471429	-0.327186	0.384242	0.114286
chr11	70333535	70334078	HYPO6271	0.161529	0.480807	-0.319279	0.250576	0.110899
chr11	70409044	70409277	HYPO6277	0.204286	0.55	-0.345714	0.243889	0.372409
chr11	72985290	72985839	HYPO6351	0.159794	0.580836	-0.421042	0.34828	0.345592
chr11	74860304	74861698	HYPO6380	0.142352	0.552825	-0.410473	0.167326	0.210054
chr11	74864516	74865873	HYPO6381	0.143649	0.516162	-0.372513	0.167133	0.198081
chr11	74866804	74868228	HYPO6382	0.249477	0.556175	-0.306699	0.282113	0.204937
chr11	74976975	74977400	HYPO6390	0.233161	0.599733	-0.366571	0.2235	0.267856
chr11	76123207	76123732	HYPO6449	0.224702	0.549303	-0.3246	0.29594	0.258863
chr11	76281870	76282059	HYPO6459	0.175	0.527778	-0.352778	0.205	0.114336
chr11	76670704	76671000	HYPO6476	0.185684	0.56386	-0.378176	0.178595	0.429654
chr11	77254391	77254809	HYPO6490	0.277546	0.703041	-0.425496	0.317976	0.335382
chr11	79543128	79543473	HYPO6601	0.192221	0.610847	-0.418626	0.304167	0.206655
chr11	81795807	81795970	HYPO6657	0.246577	0.55975	-0.313173	0.349621	0.201562
chr11	82258430	82258514	HYPO6671	0.157143	0.789744	-0.632601	0.59127	0.316542
chr11	85305565	85306193	HYPO6773	0.215636	0.519754	-0.304118	0.113872	0.0890122
chr11	85864128	85865150	HYPO6796	0.238536	0.597778	-0.359242	0.548083	0.376232
chr11	86194460	86195363	HYPO6800	0.221334	0.540278	-0.318943	0.310995	0.408325
chr11	86226224	86226513	HYPO6802	0.257654	0.59845	-0.340797	0.399206	0.249981
chr11	86768246	86768699	HYPO6824	0.102934	0.627579	-0.524645	0.36462	0.232273
chr11	86804887	86805458	HYPO6826	0.183248	0.618634	-0.435386	0.314394	0.456693
chr11	87542963	87543024	HYPO6854	0.205357	0.580952	-0.375595	0.425264	0.37719
chr11	87591231	87591586	HYPO6860	0.210714	0.58502	-0.374306	0.604167	0.311284
chr11	87919827	87919960	HYPO6874	0.261255	0.782576	-0.52132	0.210119	0.35056
chr11	87926992	87927608	HYPO6876	0.116968	0.573224	-0.456256	0.302597	0.219264
chr11	87986497	87987219	HYPO6885	0.164626	0.511458	-0.346833	0.113636	0.156565
chr11	88227587	88227897	HYPO6896	0.285098	0.880732	-0.595634	0.597002	0.470401
chr11	88274069	88274255	HYPO6897	0.217347	0.693186	-0.475838	0.299242	0.29724
chr11	88281357	88281730	HYPO6898	0.190087	0.508465	-0.318378	0.293012	0.21962
chr11	88681961	88682974	HYPO6909_HYPO6428	0.110196	0.439827	-0.32963	0.131213	0.0928541
chr11	90003719	90005116	HYPO6953	0.291323	0.622602	-0.331279	0.313	0.28
chr11	90705961	90706364	HYPO6967	0.299075	0.664242	-0.365166	0.299074	0.230739
chr11	94050898	94051067	HYPO6988	0.153571	0.550672	-0.3971	0.375758	0.35904
chr11	94101372	94101718	HYPO6991	0.257744	0.575926	-0.318182	0.470726	0.268282
chr11	94802558	94803104	HYPO7028	0.192186	0.537919	-0.345733	0.396844	0.332844
chr11	95456230	95456349	HYPO7080	0.178241	0.504629	-0.326389	0.25	0.322199
chr11	95698518	95698790	HYPO7099	0.179253	0.62752	-0.448267	0.281313	0.181952
chr11	96624455	96624694	HYPO7168	0.289232	0.611983	-0.322752	0.263617	0.25911
chr11	96789998	96791123	HYPO7183	0.213756	0.544094	-0.330338	0.280577	0.219575
chr11	97009925	97010281	HYPO7211	0.335548	0.692316	-0.356768	0.42215	0.385073
chr11	97595016	97595400	HYPO7256	0.30204	0.658211	-0.356172	0.241667	0.297553
chr11	97693324	97694093	HYPO7270	0.202325	0.510045	-0.307719	0.393868	0.262223
chr11	97698438	97698759	HYPO7271	0.262812	0.757937	-0.495125	0.352315	0.374686
chr11	98827824	98828441	HYPO7362	0.183388	0.565909	-0.382522	0.43	0.288411
chr11	98981877	98982131	HYPO7370	0.179012	0.586695	-0.407683	0.332261	0.16793
chr11	100249179	100250195	HYPO7408	0.21243	0.553218	-0.340788	0.295309	0.257642
chr11	100252267	100252884	HYPO7409	0.199103	0.5579	-0.358797	0.459524	0.229409
chr11	100254141	100254652	HYPO7410	0.140782	0.552247	-0.411465	0.319351	0.43341
chr11	100667735	100667987	HYPO7442	0.233271	0.594118	-0.360846	0.416162	0.406941
chr11	100766115	100766268	HYPO7451	0.166666	0.588294	-0.421627	0.472222	0.419872
chr11	101478413	101478728	HYPO7508	0.231401	0.550966	-0.319565	0.162798	0.245484
chr11	101529191	101530197	HYPO7515	0.182589	0.550681	-0.368092	0.516272	0.22255
chr11	101548644	101549474	HYPO7517	0.145052	0.532492	-0.387441	0.367177	0.17164
chr11	101712423	101713075	HYPO7530	0.225378	0.604203	-0.378825	0.217901	0.280114
chr11	101758137	101758675	HYPO7537	0.192857	0.723936	-0.531079	0.458334	0.226712
chr11	102172341	102172509	HYPO7575	0.25	0.8	-0.55	0.316667	0.226959
chr11	102188551	102188818	HYPO7577	0.191587	0.669877	-0.47829	0.336111	0.22606
chr11	102505235	102505502	HYPO7605	0.194885	0.529853	-0.334969	0.293338	0.294272
chr11	102653400	102653846	HYPO7618	0.240928	0.590085	-0.349158	0.21833	0.235459
chr11	102798040	102798476	HYPO7624	0.177399	0.599903	-0.422504	0.574008	0.446981
chr11	103054661	103054915	HYPO7647	0.308045	0.705556	-0.397511	0.279762	0.31948
chr11	103060319	103061107	HYPO7648_HYPO7163	0.239321	0.556316	-0.316995	0.226572	0.143017
chr11	103084893	103085849	HYPO7650	0.204594	0.508623	-0.304029	0.305521	0.335099
chr11	103147361	103147624	HYPO7655	0.141667	0.542078	-0.400411	0.27619	0.182333
chr11	103216703	103216821	HYPO7663	0.0571428	0.416667	-0.359524	0.47619	0.159298
chr11	104164002	104164328	HYPO7697	0.161396	0.503279	-0.341883	0.179674	0.235047
chr11	105346895	105347052	HYPO7729	0.108383	0.495364	-0.386981	0.435065	0.221678
chr11	105814738	105814948	HYPO7734	0.17298	0.485205	-0.312225	0.202727	0.214298
chr11	106235071	106235556	HYPO7758	0.242044	0.618777	-0.376733	0.318627	0.270663
chr11	106433351	106433731	HYPO7762	0.117613	0.449004	-0.331391	0.0570945	0.209225
chr11	106450149	106450343	HYPO7764	0.159634	0.459641	-0.300007	0.0810023	0.217583
chr11	106570926	106571212	HYPO7774	0.214241	0.688476	-0.474234	0.237958	0.124354
chr11	106656820	106657249	HYPO7779	0.254985	0.626972	-0.371987	0.371179	0.176703
chr11	106837458	106837966	HYPO7783	0.138783	0.557919	-0.419136	0.465678	0.108843
chr11	107178928	107179503	HYPO7792	0.280295	0.58145	-0.301156	0.43729	0.286252
chr11	107202297	107203058	HYPO7793_HYPO7310	0.0910014	0.402175	-0.311173	0.140572	0.172167
chr11	107227638	107228191	HYPO7794	0.28945	0.692498	-0.403049	0.358029	0.237201
chr11	107240816	107241185	HYPO7796	0.226549	0.717237	-0.490688	0.322133	0.320091
chr11	107624517	107624763	HYPO7812	0.127965	0.4329	-0.304935	0.0717532	0.111905
chr11	107923231	107923429	HYPO7821	0.286466	0.601768	-0.315302	0.5	0.363817
chr11	108120176	108120857	HYPO7826	0.12746	0.471133	-0.343672	0.208117	0.260301
chr11	108226464	108226783	HYPO7828	0.099026	0.428889	-0.329863	0.3	0.226364
chr11	108902568	108902886	HYPO7839	0.207875	0.516764	-0.308889	0.578333	0.379642
chr11	108987105	108987232	HYPO7842	0.149697	0.47101	-0.321313	0.7	0.399567
chr11	109217029	109217502	HYPO7855	0.260426	0.601073	-0.340647	0.38007	0.353575
chr11	109228331	109228868	HYPO7857	0.280095	0.654325	-0.37423	0.394864	0.418503
chr11	109567386	109567501	HYPO7873	0.244705	0.545559	-0.300853	0.246938	0.446987
chr11	109734712	109736674	HYPO7877	0.176366	0.51593	-0.339563	0.287515	0.263709
chr11	110028754	110029831	HYPO7880	0.176443	0.597677	-0.421234	0.244299	0.233767
chr11	110396294	110396765	HYPO7892	0.300334	0.722674	-0.42234	0.495584	0.645614
chr11	111157442	111157823	HYPO7896	0.206861	0.613398	-0.406537	0.572842	0.219569
chr11	112100546	112100836	HYPO7903	0.228978	0.550222	-0.321244	0.314286	0.186708
chr11	112853339	112853406	HYPO7915	0.141667	0.523308	-0.381642	0.3	0.286667
chr11	113082784	113082944	HYPO7922	0.212798	0.543651	-0.330853	0.192177	0.297992
chr11	113144806	113144959	HYPO7923	0.130952	0.575677	-0.444724	0.206945	0.184445
chr11	113588699	113588903	HYPO7936	0.251683	0.577042	-0.325359	0.410119	0.463598
chr11	113668592	113668765	HYPO7942	0.0833334	0.606746	-0.523413	0.165873	0.19332
chr11	114518383	114518636	HYPO7975	0.264417	0.671236	-0.406819	0.288118	0.335354
chr11	114560951	114561189	HYPO7982	0.308013	0.706845	-0.398833	0.489583	0.334314
chr11	115599775	115600108	HYPO8057	0.170515	0.555656	-0.385141	0.35695	0.334563
chr11	115988597	115988991	HYPO8083	0.223424	0.600848	-0.377424	0.141865	0.15868
chr11	116250698	116251046	HYPO8099	0.182946	0.492021	-0.309075	0.530495	0.576441
chr11	116251136	116252340	HYPO8100	0.294524	0.786767	-0.492244	0.672917	0.928889
chr11	116417495	116417791	HYPO8114	0.208759	0.520223	-0.311464	0.544011	0.249101
chr11	116491951	116492263	HYPO8123	0.0886243	0.588889	-0.500264	0.136805	0.439286
chr11	116510016	116510183	HYPO8127	0.191667	0.85	-0.658333	0.232727	0.175849
chr11	116674160	116674447	HYPO8136	0.17801	0.549887	-0.371877	0.403704	0.29144
chr11	116675383	116676583	HYPO8137_HYPO7631	0.135427	0.449191	-0.313764	0.263645	0.175062
chr11	116958569	116959845	HYPO8166	0.269367	0.624504	-0.355137	0.307499	0.314619
chr11	116991486	116992367	HYPO8174	0.292963	0.622659	-0.329697	0.544841	0.315444
chr11	117108379	117109169	HYPO8182	0.251066	0.575854	-0.324789	0.282359	0.288141
chr11	117117457	117117703	HYPO8183	0.132862	0.771014	-0.638152	0.111472	0.252224
chr11	117129977	117130245	HYPO8186	0.243136	0.555291	-0.312155	0.315278	0.343254
chr11	117137130	117137584	HYPO8187	0.0711996	0.573017	-0.501817	0.191239	0.245114
chr11	117489332	117489873	HYPO8218	0.236905	0.538519	-0.301615	0.150583	0.152227
chr11	118185692	118186096	HYPO8270	0.218697	0.698413	-0.479716	0.362245	0.433065
chr11	118226584	118227333	HYPO8274	0.242941	0.61486	-0.371919	0.368745	0.413771
chr11	118294603	118295301	HYPO8281	0.268869	0.576215	-0.307346	0.323473	0.281085
chr11	118297746	118298042	HYPO8283	0.20671	0.533497	-0.326787	0.376498	0.256786
chr11	118414079	118414650	HYPO8295	0.151263	0.529833	-0.37857	0.232143	0.283934
chr11	118462686	118462762	HYPO8300	0.170563	0.600635	-0.430072	0.561905	0.528822
chr11	118868769	118869493	HYPO8318	0.229612	0.541215	-0.311603	0.263968	0.196283
chr11	119176053	119176262	HYPO8347	0.217592	0.609741	-0.392148	0.51746	0.505911
chr11	120112072	120113317	HYPO8389_HYPO7867	0.130443	0.455557	-0.325114	0.187985	0.30167
chr11	120116824	120118728	HYPO8391	0.176796	0.609259	-0.432463	0.217267	0.313628
chr12	3385975	3386291	HYPO8468	0.261334	0.633791	-0.372458	0.361369	0.355273
chr12	4046475	4046594	HYPO8486	0.137121	0.443424	-0.306303	0.118518	0.0954964
chr12	8393347	8393856	HYPO8527	0.152012	0.581746	-0.429734	0	0.151876
chr12	8824715	8825105	HYPO8541	0.118762	0.498038	-0.379276	0.261111	0.212869
chr12	10456653	10456690	HYPO8565	0.25	1	-0.75	NA	0.375
chr12	10520545	10521204	HYPO8566	0.313044	0.678207	-0.365162	0.444733	0.557379
chr12	11210847	11211502	HYPO8574	0.1589	0.489256	-0.330356	0.258001	0.230458
chr12	12732665	12732943	HYPO8591	0.219231	0.585374	-0.366143	0.394627	0.256092
chr12	12849093	12849448	HYPO8596	0.286025	0.622715	-0.336691	0.16621	0.157355
chr12	15711204	15711678	HYPO8612	0.0941468	0.439885	-0.345738	0.164025	0.130086
chr12	16152485	16152751	HYPO8615	0.16266	0.49838	-0.33572	0.079365	0.356594
chr12	17748376	17748895	HYPO8660	0.142887	0.480781	-0.337895	0.335714	0.145211
chr12	18142826	18142865	HYPO8669	0.201587	0.541667	-0.340079	0.432478	0.234636
chr12	28152727	28153276	HYPO8794	0.276078	0.659771	-0.383693	0.413426	0.542494
chr12	29275186	29275559	HYPO8802	0.226551	0.580989	-0.354437	0.351479	0.361073
chr12	30095195	30095316	HYPO8819	0.279304	0.668051	-0.388747	0.752495	0.749696
chr12	31822259	31822472	HYPO8841	0.207937	0.623016	-0.415079	0.412121	0.378645
chr12	31888449	31889080	HYPO8844	0.160469	0.545784	-0.385315	0.29448	0.318562
chr12	33562862	33563413	HYPO8870	0.18956	0.638954	-0.449394	0.31379	0.360382
chr12	33756873	33757383	HYPO8879	0.162607	0.556108	-0.393501	0.335555	0.225719
chr12	33920684	33921039	HYPO8885	0.28032	0.621459	-0.34114	0.302307	0.187984
chr12	34963587	34964321	HYPO8900	0.262146	0.594667	-0.332521	0.562348	0.613812
chr12	37449319	37450086	HYPO8921	0.163075	0.48642	-0.323345	0.13543	0.380357
chr12	42082055	42083506	HYPO8946	0.294012	0.598739	-0.304727	0.492143	0.469345
chr12	46041112	46041518	HYPO8957	0.220797	0.590961	-0.370164	0.401629	0.402669
chr12	52830070	52830407	HYPO8981	0.143083	0.476021	-0.332938	0.0973546	0.254832
chr12	54393723	54394265	HYPO9009	0.304215	0.625373	-0.321158	0.380497	0.461895
chr12	56588459	56588600	HYPO9062	0.16814	0.684891	-0.516751	0.349387	0.453898
chr12	57061281	57061557	HYPO9077	0.294526	0.735817	-0.441291	0.456104	0.425783
chr12	57694681	57695431	HYPO9091	0.184602	0.548596	-0.363993	0.315585	0.238889
chr12	58060143	58060334	HYPO9101	0.284227	0.611111	-0.326884	0.306614	0.270818
chr12	70400360	70400580	HYPO9153	0.255117	0.63375	-0.378633	0.184132	0.195044
chr12	70598093	70598464	HYPO9169	0.241115	0.682601	-0.441486	0.502976	0.407705
chr12	71699218	71699633	HYPO9196	0.260267	0.620521	-0.360253	0.563991	0.455028
chr12	71717167	71717757	HYPO9197	0.267965	0.641996	-0.374031	0.259447	0.163638
chr12	72986896	72987235	HYPO9237	0.105754	0.530953	-0.425198	0.173965	0.348049
chr12	73763559	73763783	HYPO9252	0.118333	0.486667	-0.368334	0.0833334	0.290557
chr12	74388679	74388969	HYPO9279	0.16772	0.481944	-0.314225	0.104167	0.121243
chr12	74487714	74488120	HYPO9283	0.15544	0.586145	-0.430705	0.32389	0.291941
chr12	74608190	74608357	HYPO9287	0.285198	0.812443	-0.527245	0.645543	0.136919
chr12	76405011	76405531	HYPO9322	0.191991	0.514804	-0.322813	0.396744	0.404852
chr12	76455311	76455805	HYPO9325	0.219519	0.698174	-0.478655	0.303929	0.334004
chr12	76488915	76489144	HYPO9326	0.0551183	0.484043	-0.428924	0.393466	0.256969
chr12	76496489	76496773	HYPO9328	0.259288	0.779406	-0.520118	0.486743	0.614583
chr12	78149458	78149638	HYPO9378	0.178451	0.58168	-0.403229	0.284921	0.0859649
chr12	80980528	80980878	HYPO9421	0.2	0.678788	-0.478788	0.404643	0.243991
chr12	81324519	81325024	HYPO9442	0.196188	0.559567	-0.363379	0.129476	0.141597
chr12	82917400	82918306	HYPO9486	0.133995	0.435387	-0.301392	0.250031	0.140661
chr12	84201467	84201934	HYPO9504	0.0948472	0.503802	-0.408955	0.173908	0.264998
chr12	84961884	84962009	HYPO9514	0.212419	0.677454	-0.465035	0.451755	0.16242
chr12	85288083	85288350	HYPO9520	0.244759	0.576871	-0.332112	0.629461	0.278192
chr12	85506578	85507183	HYPO9530	0.163675	0.482168	-0.318493	0.0860529	0.38879
chr12	85555696	85556901	HYPO9538	0.201433	0.615858	-0.414426	0.333884	0.265006
chr12	85828495	85828865	HYPO9547	0.234524	0.561328	-0.326804	0.205177	0.191002
chr12	85955626	85955874	HYPO9552	0.138462	0.442366	-0.303905	0.157738	0.294017
chr12	86192493	86192911	HYPO9568	0.121058	0.501435	-0.380376	0.208493	0.315399
chr12	86435706	86435865	HYPO9576	0.256036	0.607606	-0.35157	0.449405	0.341468
chr12	86516250	86516567	HYPO9581	0.257938	0.63211	-0.374172	0.510417	0.336599
chr12	86526715	86527061	HYPO9584	0.301282	0.700227	-0.398945	0.176364	0.237153
chr12	86707158	86707724	HYPO9595	0.250974	0.640218	-0.389244	0.379329	0.443423
chr12	86778194	86778666	HYPO9598	0.111047	0.5227	-0.411653	0.216025	0.0780638
chr12	87428923	87429675	HYPO9627	0.180786	0.492943	-0.312157	0.301587	0.370335
chr12	87858426	87858982	HYPO9651	0.0908163	0.455754	-0.364938	0.326389	0.430789
chr12	98640976	98641438	HYPO9748	0	0.411111	-0.411111	0.037037	0.15625
chr12	99572471	99573018	HYPO9753	0.284313	0.595207	-0.310894	0.45488	0.707041
chr12	99575776	99576455	HYPO9754	0.198593	0.509524	-0.310931	0.341667	0.290278
chr12	101527854	101528550	HYPO9792	0.195833	0.595952	-0.400119	0.09375	0.171861
chr12	101751036	101751221	HYPO9796	0.145253	0.86489	-0.719638	0.472381	0.421667
chr12	102246268	102246518	HYPO9814	0.156818	0.496261	-0.339442	0.132606	0.285112
chr12	103542080	103542550	HYPO9830	0.0708333	0.386136	-0.315303	0.294444	0.213684
chr12	103736683	103736980	HYPO9837	0.275543	0.755006	-0.479464	0.411111	0.306137
chr12	103929366	103929741	HYPO9843	0.182936	0.532117	-0.34918	0.440584	0.317972
chr12	105672207	105672465	HYPO9879	0.270511	0.60485	-0.334339	0.502835	0.411977
chr12	105799143	105799624	HYPO9887	0.212868	0.615593	-0.402724	0.517361	0.380017
chr12	106231080	106231406	HYPO9904	0.16303	0.476179	-0.313148	0.1	0.218689
chr12	107143138	107143795	HYPO9938	0.107928	0.447619	-0.339691	0.319444	0.216104
chr12	107753424	107753678	HYPO9961	0.190476	0.496429	-0.305953	0.34	0.148547
chr12	108350325	108350723	HYPO9974	0.204573	0.612002	-0.407429	0.461343	0.524219
chr12	109287909	109288160	HYPO9992	0.241518	0.555542	-0.314024	0.126443	0.270454
chr12	109671630	109672164	HYPO10014	0.279873	0.728535	-0.448662	0.611905	0.472801
chr12	110852695	110852915	HYPO10049	0.10191	0.406133	-0.304223	0.23943	0.256036
chr12	111846853	111847400	HYPO10071	0.079509	0.417151	-0.337643	0.253683	0.142904
chr12	111926009	111926557	HYPO10073	0.0787242	0.403571	-0.324847	0.155354	0.152454
chr12	112233031	112233152	HYPO10084	0.158333	0.531111	-0.372778	0.41746	0.338069
chr12	112373013	112373305	HYPO10088	0.190853	0.510508	-0.319654	0.494949	0.341017
chr12	112523890	112524239	HYPO10096	0.244154	0.591317	-0.347163	0.237951	0.100989
chr12	112601660	112602200	HYPO10099	0.287832	0.650304	-0.362472	0.450541	0.451786
chr12	112603218	112603725	HYPO10100	0.189951	0.537178	-0.347227	0.276122	0.294668
chr12	112946894	112947096	HYPO10131	0.158207	0.66022	-0.502012	0.335897	0.546389
chr12	112963256	112964669	HYPO10133	0.276885	0.608483	-0.331598	0.376774	0.259458
chr12	113054794	113054966	HYPO10139	0.176317	0.535669	-0.359353	0.284226	0.138367
chr12	113174973	113175478	HYPO10142	0.162348	0.470334	-0.307986	0.320089	0.0822649
chr12	113251173	113251565	HYPO10146	0.108929	0.456605	-0.347677	0.488095	0.258436
chr12	113568234	113568412	HYPO10161	0.24122	0.611111	-0.369891	0.300694	0.395211
chr12	113726664	113726933	HYPO10166	0.221144	0.580732	-0.359589	0.366711	0.138873
chr12	113814538	113815230	HYPO10173	0.0654762	0.480237	-0.414761	0.28424	0.152232
chr12	113833973	113834800	HYPO10175	0.2873	0.658041	-0.370741	0.352845	0.321257
chr12	113905768	113906414	HYPO10183	0.177469	0.532468	-0.354998	0.321428	0.231617
chr12	114032476	114032973	HYPO10192	0.190044	0.510733	-0.320689	0.217262	0.161957
chr12	114034961	114035353	HYPO10194	0.334312	0.7096	-0.375288	0.4375	0.496932
chr12	118989568	118990434	HYPO10255	0.228875	0.639481	-0.410606	0.320005	0.266527
chr12	119153182	119153700	HYPO10262	0.281478	0.645748	-0.36427	0.352835	0.33626
chr13	5864681	5865526	HYPO10307	0.292512	0.650192	-0.35768	0.29966	0.298321
chr13	10652507	10653006	HYPO10340	0.243207	0.555396	-0.312189	0.339562	0.377692
chr13	20266214	20266903	HYPO10418	0.227556	0.558953	-0.331397	0.143147	0.0713925
chr13	24613185	24614078	HYPO10551	0.224962	0.584208	-0.359246	0.245068	0.300705
chr13	24721398	24721776	HYPO10556	0.162143	0.790556	-0.628413	0.537143	0.380115
chr13	28636058	28636273	HYPO10583	0.284911	0.617857	-0.332946	0.585119	0.442641
chr13	29269692	29270329	HYPO10594	0.17722	0.523771	-0.346551	0.303112	0.315198
chr13	29447894	29448169	HYPO10596	0.283082	0.668038	-0.384955	0.475053	0.381987
chr13	30510368	30510891	HYPO10609	0.22479	0.541853	-0.317064	0.535119	0.606814
chr13	30575998	30576771	HYPO10610	0.319004	0.619392	-0.300388	0.497742	0.459779
chr13	30901101	30901473	HYPO10619	0.126694	0.554368	-0.427674	0.379457	0.298635
chr13	31851710	31852733	HYPO10633	0.152525	0.458901	-0.306376	0.286111	0.160484
chr13	32868292	32868455	HYPO10646	0.200069	0.622484	-0.422415	0.319048	0.75563
chr13	33087159	33087839	HYPO10653	0.224803	0.590278	-0.365475	0.35167	0.23277
chr13	34176030	34176424	HYPO10662	0.194063	0.524932	-0.330869	0.291156	0.158172
chr13	34486501	34487313	HYPO10671	0.253579	0.666037	-0.412458	0.455744	0.311043
chr13	36387810	36388280	HYPO10698	0.13752	0.456747	-0.319227	0.389845	0.179148
chr13	38382352	38382727	HYPO10738	0.301775	0.636777	-0.335001	0.33039	0.0769036
chr13	41435510	41435626	HYPO10785	0.254753	0.731513	-0.47676	0.499514	0.39111
chr13	42979449	42980238	HYPO10814	0.240222	0.544042	-0.30382	0.251587	0.20345
chr13	43594323	43594532	HYPO10834	0.254581	0.701125	-0.446544	0.425012	0.421705
chr13	43780049	43780288	HYPO10844	0.101587	0.462648	-0.361061	0.194697	0.12742
chr13	44002756	44003571	HYPO10852	0.259549	0.57037	-0.310821	0.207692	0.170104
chr13	44456262	44456485	HYPO10862	0.231271	0.545155	-0.313884	0.392857	0.46853
chr13	45524669	45524818	HYPO10885	0.226357	0.540281	-0.313924	0.171923	0.445892
chr13	45671464	45672074	HYPO10893	0.245278	0.746324	-0.501046	0.284643	0.174126
chr13	45804715	45805070	HYPO10895	0.249416	0.716831	-0.467416	0.236344	0.363163
chr13	46618734	46619277	HYPO10916	0.23429	0.550661	-0.316372	0.278125	0.389262
chr13	47312505	47313203	HYPO10932	0.178049	0.523209	-0.345159	0.238011	0.415603
chr13	47319788	47320513	HYPO10933	0.336498	0.644633	-0.308135	0.327338	0.289643
chr13	47893100	47894129	HYPO10941	0.31243	0.62619	-0.313761	0.365669	0.319687
chr13	49599997	49601455	HYPO10998	0.187042	0.524601	-0.337559	0.270258	0.344324
chr13	49676935	49677703	HYPO10999	0.246128	0.625917	-0.37979	0.278571	0.222432
chr13	51423519	51424532	HYPO11013	0.295624	0.596377	-0.300753	0.344439	0.295405
chr13	51469805	51470102	HYPO11014	0.310893	0.621955	-0.311063	0.423363	0.360969
chr13	51971700	51971776	HYPO11042	0.215699	0.592522	-0.376823	0.755485	0.43996
chr13	52141660	52142337	HYPO11050	0.192862	0.552983	-0.360121	0.317888	0.186865
chr13	52155783	52156315	HYPO11051	0.188933	0.605155	-0.416223	0.116667	0.113165
chr13	52209916	52210326	HYPO11053	0.322538	0.681708	-0.35917	0.471428	0.344747
chr13	53104237	53104518	HYPO11079	0.11857	0.43141	-0.31284	0.500331	0.344808
chr13	53765873	53766112	HYPO11103	0.210135	0.515036	-0.304901	0.350831	0.377059
chr13	55310887	55311169	HYPO11169	0.250105	0.705391	-0.455285	0.380952	0.45016
chr13	55480440	55481034	HYPO11176	0.256571	0.610033	-0.353462	0.356456	0.249979
chr13	55956927	55957519	HYPO11206	0.21676	0.622205	-0.405444	0.398173	0.46266
chr13	56000360	56001102	HYPO11207	0.195355	0.496464	-0.301108	0.347439	0.254547
chr13	56078159	56078571	HYPO11212	0.193115	0.515957	-0.322842	0.348589	0.197025
chr13	56442010	56442205	HYPO11234	0.220833	0.690344	-0.469511	0.572283	0.480119
chr13	56667633	56668055	HYPO11244	0.300061	0.602008	-0.301947	0.321514	0.390268
chr13	56699234	56699555	HYPO11247	0.105583	0.412492	-0.306909	0.091163	0.141085
chr13	56763950	56764500	HYPO11255	0.328168	0.779332	-0.451164	0.618888	0.556164
chr13	60155612	60156097	HYPO11338	0.173627	0.481297	-0.30767	0.291799	0.289217
chr13	60159094	60159749	HYPO11339	0.293668	0.702884	-0.409216	0.376089	0.266129
chr13	60599112	60599574	HYPO11357	0.160419	0.567614	-0.407194	0.216617	0.0949266
chr13	60745908	60746260	HYPO11360	0.129524	0.466667	-0.337143	0.272321	0.263593
chr13	60784627	60784881	HYPO11363	0.262337	0.629942	-0.367605	0.252568	0.375684
chr13	60808642	60809166	HYPO11365	0.278182	0.620303	-0.342121	0.407265	0.362283
chr13	63343826	63344496	HYPO11394	0.266729	0.576944	-0.310216	0.206689	0.277706
chr13	63356712	63357310	HYPO11395	0.279847	0.605357	-0.32551	0.367169	0.417221
chr13	63358100	63358456	HYPO11396	0.144396	0.55036	-0.405965	0.277502	0.148512
chr13	63373501	63374587	HYPO11398_HYPO10704	0.084613	0.494421	-0.409808	0.299463	0.122277
chr13	67876436	67876763	HYPO11476	0.0416668	0.464583	-0.422916	0.714286	0.457857
chr13	72865233	72865485	HYPO11542	0.230006	0.543519	-0.313513	0.259307	0.37426
chr13	73847250	73847606	HYPO11560	0.212957	0.582828	-0.369871	0.373413	0.40873
chr13	74030160	74030565	HYPO11566	0.150481	0.573611	-0.42313	0.128571	0.217366
chr13	90499450	90499810	HYPO11655	0.201868	0.55455	-0.352683	0.211343	0.255026
chr13	90534184	90534914	HYPO11656	0.188889	0.555268	-0.366379	0.432612	0.182244
chr13	93499711	93500282	HYPO11680	0.183881	0.504324	-0.320443	0.270303	0.257626
chr13	94010750	94011261	HYPO11690	0.17232	0.643778	-0.471458	0.248022	0.340952
chr13	94557611	94557984	HYPO11698	0.0995393	0.505824	-0.406284	0.312956	0.169541
chr13	94834509	94834935	HYPO11708	0.161493	0.570185	-0.408692	0.153525	0.410834
chr13	96409362	96409510	HYPO11750	0.260964	0.696561	-0.435597	0.376058	0.287802
chr13	96564373	96564877	HYPO11754	0.203265	0.623967	-0.420702	0.392441	0.174359
chr13	96843685	96844390	HYPO11759	0.180174	0.486324	-0.30615	0.296154	0.382205
chr13	98051981	98052440	HYPO11782	0.235091	0.558127	-0.323037	0.165917	0.0745932
chr13	98065211	98065976	HYPO11783	0.0994949	0.456534	-0.357039	0.333732	0.321807
chr13	98111407	98111696	HYPO11785	0.140183	0.495428	-0.355244	0.232381	0.297876
chr13	98387858	98388361	HYPO11793	0.213593	0.619039	-0.405447	0.284379	0.341695
chr13	98680970	98681438	HYPO11798	0.262844	0.648005	-0.385161	0.337692	0.0995367
chr13	99894693	99895298	HYPO11843	0.199662	0.571141	-0.37148	0.267226	0.247089
chr13	99958548	99958887	HYPO11845	0.21485	0.538374	-0.323523	0.192682	0.312146
chr13	100411864	100412531	HYPO11858	0.297307	0.613883	-0.316575	0.56425	0.581117
chr13	100506971	100507712	HYPO11859	0.188718	0.513986	-0.325268	0.389524	0.2625
chr13	100563987	100564571	HYPO11861	0.257809	0.565254	-0.307445	0.234048	0.310551
chr13	101720342	101721152	HYPO11891	0.161887	0.530867	-0.368981	0.276531	0.248664
chr13	103296753	103297003	HYPO11910	0.162215	0.513507	-0.351292	0.276107	0.243189
chr13	103415430	103416262	HYPO11912	0.280001	0.597039	-0.317038	0.304464	0.256851
chr13	103600509	103600813	HYPO11916	0.125	0.6375	-0.5125	0.75	0.25619
chr13	103664870	103665309	HYPO11919	0.224835	0.676888	-0.452053	0.261111	0.328572
chr13	104061179	104061397	HYPO11931	0.162337	0.725128	-0.562791	0.556111	0.606439
chr13	104450811	104451132	HYPO11934	0.245921	0.576768	-0.330846	0.374526	0.266033
chr13	104775608	104775879	HYPO11941	0.202865	0.586917	-0.384052	0.290025	0.441523
chr13	105612752	105613084	HYPO11951	0.294433	0.607341	-0.312909	0.464444	0.272681
chr13	105778390	105779125	HYPO11956	0.256336	0.632351	-0.376015	0.308496	0.51936
chr13	106014035	106014361	HYPO11958	0.268486	0.594129	-0.325643	0.436905	0.468467
chr13	108283861	108284179	HYPO11977	0.213307	0.579502	-0.366195	0.0988095	0.374505
chr13	112082083	112082373	HYPO12034	0.130726	0.561355	-0.43063	0.248443	0.198932
chr13	112582874	112583240	HYPO12041	0.292527	0.604898	-0.31237	0.347338	0.257074
chr13	113553673	113554197	HYPO12070	0.151119	0.589705	-0.438586	0.268175	0.161003
chr13	114508657	114509042	HYPO12104_HYPO11368	0	0.45	-0.45	0	0.236508
chr13	114719695	114721002	HYPO12110	0.297348	0.646999	-0.349651	0.324517	0.347666
chr13	114744656	114744968	HYPO12111	0.275891	0.723173	-0.447282	0.56457	0.604648
chr13	115549635	115550787	HYPO12115	0.30371	0.637897	-0.334187	0.329356	0.387276
chr13	116626287	116626763	HYPO12127	0.186191	0.555455	-0.369264	0.317619	0.302637
chr14	8226939	8227099	HYPO12197	0.249921	0.550735	-0.300814	0.487331	0.227904
chr14	8641152	8641432	HYPO12206	0.151281	0.506059	-0.354778	0.141497	0.202763
chr14	8661928	8662414	HYPO12208	0.178075	0.641111	-0.463036	0.677619	0.351256
chr14	13221178	13221632	HYPO12240	0.280065	0.639458	-0.359393	0.365013	0.36946
chr14	15636504	15636952	HYPO12259	0.113707	0.5062	-0.392494	0.14246	0.0601271
chr14	20982135	20982426	HYPO12301	0.13826	0.600044	-0.461784	0.516402	0.408256
chr14	21065926	21066178	HYPO12303	0.177495	0.608012	-0.430516	0.375926	0.348281
chr14	21087588	21087848	HYPO12304	0.115105	0.452451	-0.337346	0.242133	0.290271
chr14	21266570	21266750	HYPO12309	0.277637	0.602505	-0.324868	0.258262	0.454958
chr14	21646634	21646891	HYPO12327	0.277155	0.581385	-0.304229	0.569813	0.459569
chr14	23259716	23260389	HYPO12364	0.235927	0.564331	-0.328404	0.283815	0.282802
chr14	24610619	24611002	HYPO12370	0.0531995	0.402381	-0.349181	0.114583	0.307991
chr14	25397977	25398356	HYPO12388	0.0680272	0.399703	-0.331676	0.154545	0.143591
chr14	26123428	26124485	HYPO12397_HYPO11624	0.118056	0.42888	-0.310824	0.219217	0.199018
chr14	26346517	26347193	HYPO12413	0.145238	0.604167	-0.458929	0.290179	0.384772
chr14	26374787	26375257	HYPO12416	0.231832	0.636074	-0.404242	0.328619	0.245694
chr14	26419401	26419533	HYPO12418	0.218434	0.588545	-0.370111	0.358059	0.424213
chr14	26558152	26558387	HYPO12426	0.247449	0.62742	-0.379972	0.434908	0.209436
chr14	26606467	26606929	HYPO12431	0.222763	0.60395	-0.381187	0.405128	0.169509
chr14	27269595	27269818	HYPO12444	0.307295	0.746439	-0.439144	0.463272	0.49026
chr14	27984465	27984850	HYPO12459	0.258284	0.720346	-0.462062	0.246561	0.259835
chr14	27995179	27995521	HYPO12462	0.239951	0.654403	-0.414452	0.102324	0.254893
chr14	28759331	28759444	HYPO12478	0.232479	0.551768	-0.319289	0.583333	0.314407
chr14	31694116	31694261	HYPO12508	0.223611	0.610796	-0.387184	0.675	0.565451
chr14	31947032	31947570	HYPO12515	0.223385	0.692884	-0.469499	0.381319	0.282869
chr14	32214083	32214540	HYPO12531	0.232603	0.608128	-0.375525	0.311157	0.128946
chr14	32225589	32226343	HYPO12532	0.230137	0.570906	-0.340769	0.258891	0.302609
chr14	32773676	32773981	HYPO12551	0.183699	0.544294	-0.360595	0.538624	0.291616
chr14	34621802	34622373	HYPO12595	0.0715946	0.384592	-0.312997	0.152873	0.183575
chr14	34739402	34740210	HYPO12598	0.166414	0.511297	-0.344882	0.376547	0.369867
chr14	37466381	37466753	HYPO12634	0.129317	0.586447	-0.45713	0.241025	0.196896
chr14	41866677	41867188	HYPO12654	0.220292	0.579508	-0.359217	0.204046	0.238707
chr14	46604066	46604422	HYPO12699	0.222585	0.562912	-0.340327	0.241481	0.383053
chr14	46937151	46937583	HYPO12705	0.161178	0.507848	-0.34667	0.239848	0.311328
chr14	47618879	47620354	HYPO12723	0.164075	0.477454	-0.313379	0.415244	0.265128
chr14	48109114	48109472	HYPO12735	0.296907	0.674991	-0.378084	0.47501	0.340561
chr14	48424751	48426137	HYPO12740	0.268454	0.582492	-0.314037	0.647883	0.348505
chr14	54834207	54834953	HYPO12828	0.284707	0.617972	-0.333266	0.487308	0.407515
chr14	54854259	54854478	HYPO12831	0.17773	0.686147	-0.508418	0.447761	0.32485
chr14	54917000	54917130	HYPO12836	0.228571	0.730159	-0.501587	0.776667	0.92919
chr14	55355896	55356237	HYPO12861	0.266926	0.683993	-0.417067	0.438617	0.308471
chr14	55787192	55787460	HYPO12888	0.186364	0.535556	-0.349192	0.135714	0.209596
chr14	56101437	56101543	HYPO12894	0	0.488095	-0.488095	0.246667	0.317143
chr14	58418972	58419087	HYPO12971	0.196597	0.564835	-0.368239	0.55487	0.371301
chr14	59983615	59984368	HYPO12983	0.144905	0.4573	-0.312395	0.241517	0.407982
chr14	61152534	61152734	HYPO13001	0.276984	0.590909	-0.313925	0.568934	0.413837
chr14	61274879	61275102	HYPO13006	0.189286	0.590278	-0.400992	0.262515	0.123812
chr14	62622077	62622448	HYPO13046	0.319021	0.619443	-0.300422	0.59536	0.369166
chr14	64348708	64349052	HYPO13091	0.184829	0.589101	-0.404272	0.37993	0.225723
chr14	64841482	64841926	HYPO13104	0.297165	0.617391	-0.320225	0.424228	0.447907
chr14	65425035	65425557	HYPO13113	0.151425	0.656803	-0.505378	0.244048	0.377091
chr14	67470075	67471595	HYPO13171	0.224586	0.564419	-0.339833	0.370821	0.245282
chr14	67745046	67745442	HYPO13181	0.190542	0.542361	-0.351819	0.493005	0.159614
chr14	68036639	68037095	HYPO13201	0.30986	0.64986	-0.34	0.351852	0.47405
chr14	70255020	70255230	HYPO13255	0.104286	0.552618	-0.448332	0.307143	0.0805037
chr14	70419484	70420554	HYPO13261	0.168144	0.48989	-0.321747	0.300216	0.418218
chr14	70641361	70641858	HYPO13281	0.177718	0.660236	-0.482518	0.370914	0.102302
chr14	71492517	71493066	HYPO13313	0.272195	0.581502	-0.309307	0.42583	0.498611
chr14	73269305	73269481	HYPO13322	0.186029	0.593327	-0.407297	0.426852	0.217692
chr14	73875227	73875804	HYPO13337	0.199814	0.574987	-0.375174	0.276667	0.256247
chr14	76654918	76655206	HYPO13382	0.253186	0.590712	-0.337527	0.397452	0.365059
chr14	76848738	76849254	HYPO13386	0.239682	0.773377	-0.533694	0.275	0.189044
chr14	76926197	76926375	HYPO13391	0.215076	0.604711	-0.389636	0.256386	0.409612
chr14	77219204	77219902	HYPO13405	0.125711	0.470911	-0.3452	0.305923	0.0706735
chr14	79557254	79557788	HYPO13434	0.113675	0.419557	-0.305881	0.303636	0.230826
chr14	79606145	79606341	HYPO13435	0.213548	0.665115	-0.451567	0.263059	0.236328
chr14	86795493	86795661	HYPO13467	0.175	0.644822	-0.469822	0.313847	0.349737
chr14	86867798	86868223	HYPO13468	0.264941	0.664155	-0.399213	0.243197	0.160001
chr14	86889169	86889461	HYPO13469	0.217455	0.625616	-0.408161	0.320181	0.236799
chr14	90009573	90009923	HYPO13477	0.193717	0.533905	-0.340188	0.210053	0.245834
chr14	99418341	99418603	HYPO13487	0.256451	0.568901	-0.31245	0.3468	0.162649
chr14	104339026	104339434	HYPO13548	0.128566	0.510943	-0.382377	0.146667	0.11585
chr14	105816899	105817448	HYPO13565	0.228271	0.734314	-0.506042	0.555267	0.658967
chr14	106139978	106140570	HYPO13574	0.24248	0.556218	-0.313738	0.374101	0.1343
chr14	106143418	106143931	HYPO13575	0.183824	0.583974	-0.40015	0.462704	0.190797
chr14	106269596	106269942	HYPO13578	0.315966	0.649884	-0.333918	0.38322	0.267846
chr14	106292499	106292718	HYPO13579	0.294243	0.636688	-0.342446	0.600083	0.369723
chr14	106378620	106380028	HYPO13583	0.210616	0.531567	-0.32095	0.189374	0.204446
chr14	113582018	113582185	HYPO13594	0.15014	0.487036	-0.336896	0.395243	0.165009
chr14	113626072	113626409	HYPO13595	0.220551	0.540636	-0.320085	0.393295	0.268254
chr14	118307855	118308679	HYPO13609	0.242825	0.556887	-0.314062	0.229323	0.255883
chr14	118360219	118360818	HYPO13611	0.198348	0.500306	-0.301958	0.502857	0.416691
chr14	118574596	118574633	HYPO13617	0.357143	0.75625	-0.399107	0.513228	0.222222
chr14	118762617	118762953	HYPO13622	0.262576	0.570914	-0.308337	0.553917	0.472992
chr14	118905746	118906016	HYPO13629	0.208477	0.615505	-0.407029	0.204911	0.215496
chr14	118965640	118965912	HYPO13631	0.145706	0.521501	-0.375795	0.339557	0.398769
chr14	119001288	119001568	HYPO13633	0.230639	0.581018	-0.350379	0.537119	0.570455
chr14	119136640	119136861	HYPO13639	0.258834	0.685395	-0.426561	0.407867	0.345353
chr14	120554481	120555478	HYPO13658	0.283604	0.589785	-0.306181	0.442657	0.245014
chr14	120687727	120688620	HYPO13660	0.131967	0.512321	-0.380354	0.167745	0.149556
chr14	120706750	120707642	HYPO13665	0.14532	0.460507	-0.315187	0.24909	0.158999
chr14	120899419	120899731	HYPO13674	0.141865	0.518729	-0.376864	0.462209	0.289636
chr14	121036874	121037303	HYPO13676	0.224024	0.525928	-0.301904	0.307079	0.305351
chr14	121240537	121241031	HYPO13680	0.222449	0.550054	-0.327605	0.173604	0.335127
chr14	121625077	121625395	HYPO13689	0.248349	0.747909	-0.49956	0.365043	0.247946
chr14	121746926	121747109	HYPO13691	0.194385	0.513445	-0.319061	0.385555	0.404449
chr14	121747690	121747998	HYPO13692	0.231285	0.627676	-0.396391	0.1732	0.265955
chr14	122036234	122036628	HYPO13702	0.124394	0.526807	-0.402413	0.379492	0.102357
chr14	122074827	122075164	HYPO13706	0.169444	0.54127	-0.371825	0.24359	0.191625
chr14	122110487	122111160	HYPO13708	0.216101	0.541534	-0.325433	0.210101	0.272708
chr15	3454782	3455114	HYPO13743	0.129047	0.482857	-0.35381	0.374603	0.0967676
chr15	5819369	5819683	HYPO13759	0.300331	0.6342	-0.333869	0.565163	0.554597
chr15	6181377	6181879	HYPO13762	0.209186	0.532537	-0.323351	0.333563	0.205285
chr15	6361495	6361757	HYPO13767	0.194986	0.563195	-0.368209	0.200136	0.14852
chr15	7094273	7095200	HYPO13784	0.21975	0.533554	-0.313804	0.405903	0.342944
chr15	7095707	7096748	HYPO13785	0.193411	0.570883	-0.377472	0.319786	0.364289
chr15	7153904	7154264	HYPO13787	0.144444	0.465909	-0.321465	0.173129	0.153491
chr15	7884213	7884943	HYPO13796	0.203719	0.510782	-0.307063	0.434371	0.239655
chr15	8917502	8917842	HYPO13811	0.286448	0.736345	-0.449897	0.321833	0.225811
chr15	10763783	10764255	HYPO13822	0.173481	0.568557	-0.395075	0.326852	0.126656
chr15	10881683	10881957	HYPO13825	0.235714	0.557051	-0.321337	0.430098	0.217436
chr15	11045617	11047067	HYPO13829	0.245361	0.582119	-0.336759	0.399703	0.405311
chr15	11058266	11058488	HYPO13830	0.080238	0.454102	-0.373864	0.2	0.196201
chr15	11384768	11385505	HYPO13834	0.268239	0.654796	-0.386557	0.369224	0.401902
chr15	11947512	11947762	HYPO13843	0.233333	0.661905	-0.428571	0.611111	0.493849
chr15	12013999	12014510	HYPO13845	0.174012	0.521197	-0.347184	0.439815	0.243006
chr15	12443405	12443575	HYPO13855	0.18326	0.569806	-0.386546	0.405772	0.296654
chr15	25289699	25290049	HYPO13888	0.207045	0.642857	-0.435812	0.374892	0.495238
chr15	25347780	25348181	HYPO13891	0.225839	0.673099	-0.447261	0.39619	0.167605
chr15	25653598	25653849	HYPO13900	0.169482	0.743532	-0.57405	0.375447	0.164812
chr15	26569047	26569475	HYPO13912	0.131647	0.464418	-0.332771	0.116382	0.341137
chr15	27415489	27415964	HYPO13916	0.271219	0.61314	-0.341921	0.358844	0.425091
chr15	27980706	27981441	HYPO13932	0.179101	0.562261	-0.383161	0.251548	0.237499
chr15	30545223	30545535	HYPO13941	0.140981	0.519676	-0.378695	0.3304	0.518855
chr15	31933044	31933520	HYPO13963	0.138889	0.466667	-0.327778	0.0454546	0.267821
chr15	34724927	34725458	HYPO13986	0.310009	0.665989	-0.35598	0.369805	0.340619
chr15	36599480	36599708	HYPO14016	0.120578	0.570449	-0.449871	0	0.179399
chr15	38850467	38851261	HYPO14080	0.198114	0.541803	-0.343689	0.295055	0.298012
chr15	39645278	39645552	HYPO14089	0.297741	0.690598	-0.392858	0.433532	0.251443
chr15	50092833	50093236	HYPO14127	0.354701	0.80604	-0.451339	0.431415	0.502206
chr15	51102845	51103382	HYPO14133	0.250312	0.710974	-0.460662	0.710494	0.251245
chr15	52963954	52964566	HYPO14150	0.167179	0.47452	-0.307341	0.386666	0.257845
chr15	53055252	53055912	HYPO14153	0.179542	0.522008	-0.342466	0.263052	0.116673
chr15	53090078	53090483	HYPO14154	0.237049	0.537652	-0.300603	0.354365	0.343954
chr15	53103210	53103600	HYPO14155	0.176551	0.525108	-0.348557	0.311224	0.294813
chr15	53489848	53490099	HYPO14159	0.26875	0.661917	-0.393167	0.534839	0.257845
chr15	54785496	54785794	HYPO14168	0.297054	0.66121	-0.364157	0.393254	0.543276
chr15	55526017	55526724	HYPO14182	0.28671	0.5884	-0.301689	0.326068	0.287628
chr15	55703083	55703334	HYPO14183	0.150997	0.478571	-0.327574	0.159048	0.201028
chr15	56056768	56057012	HYPO14188	0.220881	0.873366	-0.652485	0.33362	0.177778
chr15	56573696	56574549	HYPO14191	0.201024	0.589164	-0.388141	0.282828	0.195916
chr15	57549110	57549178	HYPO14201	0.213387	0.627755	-0.414368	0.432789	0.352751
chr15	57576914	57577381	HYPO14202	0.277518	0.628739	-0.351221	0.402778	0.167063
chr15	57581082	57581396	HYPO14203	0.199451	0.576396	-0.376945	0.477891	0.345044
chr15	57836625	57836942	HYPO14213	0.250167	0.631283	-0.381116	0.559519	0.373934
chr15	57841430	57841781	HYPO14214	0.185846	0.624403	-0.438557	0.513333	0.285403
chr15	59016170	59016257	HYPO14240	0.103333	0.565657	-0.462323	0.463333	0.434872
chr15	59474693	59475264	HYPO14253	0.250604	0.600097	-0.349492	0.245894	0.347264
chr15	59587855	59588100	HYPO14260	0.0926687	0.404271	-0.311602	0.299603	0.0753513
chr15	59776785	59776972	HYPO14267	0.174019	0.552078	-0.378059	0.327381	0.221396
chr15	61966356	61966593	HYPO14280	0.112222	0.49509	-0.382868	0.270556	0.394103
chr15	62047817	62048508	HYPO14282	0.21144	0.574426	-0.362986	0.481633	0.277865
chr15	64081740	64082607	HYPO14296	0.250965	0.558921	-0.307956	0.291162	0.328455
chr15	64176619	64177139	HYPO14300	0.236196	0.614492	-0.378296	0.141468	0.232603
chr15	64253342	64253862	HYPO14305	0.200324	0.672078	-0.471753	0.270139	0.163753
chr15	66964871	66965128	HYPO14327	0.0606837	0.5	-0.439316	0.0855839	0.102771
chr15	67032811	67033313	HYPO14331	0.292816	0.637387	-0.34457	0.161448	0.223115
chr15	67903056	67903443	HYPO14332	0.244445	0.561441	-0.316996	0.389352	0.285714
chr15	72631556	72632245	HYPO14350	0.132852	0.555208	-0.422356	0.222371	0.100518
chr15	73534261	73534625	HYPO14375	0.232078	0.593332	-0.361254	0.514947	0.260054
chr15	73559551	73559911	HYPO14380	0.21458	0.592163	-0.377582	0.528571	0.475998
chr15	73570317	73570462	HYPO14384	0.151852	0.605353	-0.453501	0.366667	0.487259
chr15	75512758	75513315	HYPO14433	0.183115	0.494823	-0.311708	0.330415	0.278466
chr15	77554299	77555308	HYPO14560_HYPO13610	0.1	0.53978	-0.43978	0.0408654	0.129167
chr15	77636748	77637768	HYPO14566	0.211385	0.579942	-0.368557	0.191558	0.258075
chr15	77713200	77713521	HYPO14575	0.145288	0.579442	-0.434154	0.387755	0.130443
chr15	78070898	78071109	HYPO14590	0.127468	0.477273	-0.349805	0.393333	0.217596
chr15	78085076	78085584	HYPO14591	0.216029	0.579222	-0.363193	0.374082	0.259448
chr15	78267243	78269073	HYPO13648_HYPO14598	0.238471	0.59337	-0.354899	0.25509	0.263489
chr15	78350753	78351112	HYPO14602	0.179486	0.560923	-0.381437	0.194248	0.187027
chr15	78465822	78466077	HYPO14613	0.0835652	0.443785	-0.36022	0.223129	0.143769
chr15	78662759	78663611	HYPO14628	0.212037	0.626108	-0.414071	0.340965	0.23023
chr15	78698910	78699088	HYPO14632	0.168844	0.595413	-0.42657	0.361224	0.21772
chr15	79225392	79225807	HYPO14676	0.0865438	0.615135	-0.528591	0.450989	0.291235
chr15	79266891	79267351	HYPO14682	0.0745581	0.42495	-0.350392	0.146428	0.0760837
chr15	79356816	79357146	HYPO14695	0.106667	0.406926	-0.30026	0.325	0.293224
chr15	79654273	79654564	HYPO14711	0.111842	0.44006	-0.328218	0.349614	0.178458
chr15	80416692	80417388	HYPO14753	0.207999	0.569319	-0.36132	0.205739	0.246355
chr15	80479531	80479864	HYPO14758	0.0932088	0.579468	-0.486259	0.376058	0.417248
chr15	80680516	80680758	HYPO14765	0.169439	0.615874	-0.446435	0.236447	0.154776
chr15	80917338	80918232	HYPO14771	0.255182	0.578215	-0.323033	0.453378	0.288894
chr15	81910447	81910524	HYPO14815	0.111616	0.546032	-0.434416	0.472857	0.327381
chr15	82206927	82207545	HYPO14839	0.188683	0.514284	-0.325601	0.207255	0.199857
chr15	83013319	83013499	HYPO14871	0.273016	0.573333	-0.300318	0.346667	0.590909
chr15	83135904	83136145	HYPO14878	0.14054	0.622487	-0.481947	0.211428	0.379436
chr15	83247835	83248192	HYPO14882	0.187205	0.518315	-0.33111	0.53288	0.325306
chr15	83513539	83513908	HYPO14898	0.253704	0.700397	-0.446693	0.352525	0.497183
chr15	84250378	84250605	HYPO14931	0.0625	0.419196	-0.356696	0.166667	0.185427
chr15	84543013	84543545	HYPO14946	0.257461	0.609738	-0.352277	0.202925	0.268284
chr15	85442151	85442654	HYPO14984	0.186236	0.498244	-0.312008	0.297475	0.133984
chr15	85491195	85491405	HYPO14990	0.332972	0.714342	-0.38137	0.550206	0.463128
chr15	85507235	85507776	HYPO14993	0.185861	0.561981	-0.376119	0.20544	0.319184
chr15	85516128	85516918	HYPO14997	0.286156	0.620275	-0.334119	0.383454	0.541488
chr15	85531599	85532239	HYPO14999	0.321577	0.643256	-0.321678	0.261756	0.294638
chr15	86050242	86051347	HYPO15028	0.211334	0.522296	-0.310961	0.258848	0.260611
chr15	86309209	86309722	HYPO15029	0.234152	0.612088	-0.377936	0.298193	0.456699
chr15	88680473	88681276	HYPO15063	0.135939	0.653796	-0.517857	0.358135	0.187888
chr15	88999517	88999785	HYPO15083	0.246408	0.55354	-0.307132	0.238889	0.271535
chr15	89256100	89256488	HYPO15097	0.281942	0.591721	-0.309779	0.602516	0.46073
chr15	91144796	91145131	HYPO15113	0.300458	0.71101	-0.410552	0.45119	0.230085
chr15	93392041	93392414	HYPO15143	0.163792	0.468202	-0.30441	0.364688	0.264525
chr15	93530488	93530741	HYPO15150	0.191948	0.560745	-0.368797	0.304376	0.206838
chr15	93763395	93763990	HYPO15160	0.233621	0.614266	-0.380645	0.39986	0.183244
chr15	93875613	93875934	HYPO15164	0.285976	0.606541	-0.320565	0.314099	0.265246
chr15	93969995	93970301	HYPO15165	0.166923	0.500488	-0.333566	0.300092	0.131621
chr15	94020324	94020847	HYPO15166	0.253029	0.664133	-0.411104	0.536541	0.56118
chr15	94049677	94051445	HYPO15168	0.220521	0.564703	-0.344182	0.252953	0.157516
chr15	94832274	94832700	HYPO15183	0.243164	0.545273	-0.30211	0.531725	0.413749
chr15	95657598	95658281	HYPO15195	0.294216	0.693317	-0.399101	0.327933	0.400297
chr15	95737795	95737965	HYPO15199	0.227062	0.651501	-0.424439	0.341667	0.187916
chr15	95782104	95782592	HYPO15200	0.271	0.583642	-0.312642	0.445801	0.331177
chr15	96574581	96574785	HYPO15222	0.195337	0.599595	-0.404258	0.208333	0.483102
chr15	97087590	97087812	HYPO15232	0.122222	0.705844	-0.583622	0.279634	0.157305
chr15	97295360	97295510	HYPO15238	0.219556	0.522471	-0.302915	0.339394	0.349424
chr15	97428712	97429094	HYPO15243	0.182123	0.605378	-0.423254	0.3329	0.202329
chr15	97593233	97593573	HYPO15254	0.176389	0.528788	-0.352399	0.414849	0.202602
chr15	97621447	97621761	HYPO15263	0.282211	0.650656	-0.368445	0.22	0.288456
chr15	97670089	97670981	HYPO15271	0.246239	0.547184	-0.300945	0.257697	0.250268
chr15	98871097	98871435	HYPO15344	0.234127	0.653809	-0.419682	0.483334	0.483334
chr15	98883875	98884307	HYPO15346	0.158671	0.471907	-0.313235	0.168055	0.0699405
chr15	99300591	99300940	HYPO15374	0.25306	0.755614	-0.502554	0.515391	0.29782
chr15	99534648	99534814	HYPO15395	0.214739	0.569898	-0.355159	0.335714	0.396175
chr15	99632291	99632677	HYPO15399	0.207055	0.606863	-0.399809	0.185568	0.158883
chr15	99647860	99650540	HYPO15401_HYPO14399_HYPO14400_HYPO14401	0.0749538	0.378591	-0.303637	0.142422	0.0975358
chr15	99697876	99698502	HYPO15406	0.254089	0.608554	-0.354465	0.287894	0.213041
chr15	100514920	100515122	HYPO15439	0.236667	0.542088	-0.305421	0.293333	0.362133
chr15	100534228	100534704	HYPO15442	0.216969	0.559006	-0.342037	0.376564	0.149619
chr15	100895481	100895937	HYPO15464	0.206993	0.545395	-0.338402	0.370346	0.296375
chr15	100964599	100965203	HYPO15472_HYPO14471	0.149342	0.536667	-0.387325	0.359127	0.23403
chr15	101059392	101059591	HYPO15483	0.197443	0.509289	-0.311846	0.299107	0.282993
chr15	101925565	101925728	HYPO15531	0.144099	0.599095	-0.454996	0.430359	0.251321
chr15	101948213	101948978	HYPO15536	0.251722	0.654414	-0.402693	0.257143	0.246264
chr15	102282610	102282738	HYPO15563	0.291111	0.650132	-0.359021	0.7	0.510432
chr16	5134818	5135110	HYPO15685	0.129563	0.550047	-0.420484	0.246825	0.195786
chr16	5139783	5140240	HYPO15687	0.237898	0.648064	-0.410166	0.373078	0.294935
chr16	5382410	5383369	HYPO15695	0.145408	0.459903	-0.314495	0.13658	0.189729
chr16	5536840	5536973	HYPO15700	0.147475	0.469841	-0.322367	0.100769	0.388048
chr16	9166110	9166444	HYPO15738	0.156032	0.463175	-0.307143	0.3125	0.240827
chr16	10762763	10763778	HYPO15759	0.244841	0.700485	-0.455644	0.535152	0.531754
chr16	10796729	10796775	HYPO15761	0.2307	0.644558	-0.413858	0.27356	0.311443
chr16	10981533	10982099	HYPO15767	0.163185	0.509504	-0.346319	0.240232	0.168291
chr16	11017986	11018286	HYPO15770	0.210722	0.562937	-0.352215	0.366071	0.299014
chr16	12328485	12328981	HYPO15785	0.241667	0.574212	-0.332546	0.650298	0.366567
chr16	13189551	13190071	HYPO15790	0.196128	0.518041	-0.321914	0.351016	0.118063
chr16	17409536	17410616	HYPO15855	0.256068	0.565693	-0.309625	0.195539	0.376145
chr16	18395590	18395972	HYPO15905	0.266667	0.603572	-0.336905	0.119048	0.315687
chr16	18608448	18608698	HYPO15917	0.191508	0.541048	-0.34954	0.125794	0.203287
chr16	21282044	21282438	HYPO15970_HYPO14965	0.219448	0.573191	-0.353743	0.296875	0.214591
chr16	21377201	21377919	HYPO15977	0.312798	0.678765	-0.365968	0.301494	0.431828
chr16	21402087	21402483	HYPO15978	0.130259	0.567212	-0.436953	0.234404	0.140021
chr16	21644389	21644583	HYPO15982	0.14303	0.707619	-0.564589	0.644444	0.331117
chr16	21701913	21703018	HYPO15984	0.189042	0.57886	-0.389817	0.29027	0.195611
chr16	21908241	21909055	HYPO15992	0.268613	0.593963	-0.325349	0.300738	0.344901
chr16	24282272	24282932	HYPO16039	0.179537	0.497691	-0.318154	0.386786	0.109767
chr16	24367517	24367951	HYPO16042	0.107035	0.451714	-0.34468	0.286977	0.223572
chr16	24433634	24433983	HYPO16044	0.172942	0.584772	-0.41183	0.258929	0.17841
chr16	24913668	24914665	HYPO16047	0.194871	0.497005	-0.302133	0.306217	0.29383
chr16	26597209	26598222	HYPO16061	0.194648	0.516359	-0.32171	0.289123	0.323612
chr16	27925616	27926993	HYPO16065	0.266668	0.585824	-0.319156	0.432555	0.3866
chr16	29745947	29747020	HYPO16089	0.302015	0.61429	-0.312275	0.350733	0.485494
chr16	30604324	30604939	HYPO16127	0.276058	0.61153	-0.335472	0.385338	0.327595
chr16	30827672	30828419	HYPO16138	0.24614	0.594939	-0.348799	0.357304	0.285686
chr16	31303474	31304100	HYPO16153	0.211107	0.560779	-0.349672	0.318322	0.357881
chr16	32064063	32064183	HYPO16183	0.154287	0.46596	-0.311673	0.293147	0.200658
chr16	32930474	32930705	HYPO16225	0.15	0.463333	-0.313333	NA	0.150909
chr16	33191611	33192726	HYPO16230	0.234005	0.591965	-0.357961	0.328929	0.282353
chr16	33576916	33577122	HYPO16238	0.293011	0.601443	-0.308432	0.487912	0.396734
chr16	33581340	33582233	HYPO16239	0.241783	0.578467	-0.336683	0.32364	0.308347
chr16	33739281	33739968	HYPO16248	0.277387	0.696403	-0.419016	0.564102	0.379014
chr16	33878167	33879034	HYPO16254	0.207435	0.537434	-0.329999	0.397425	0.245438
chr16	33916958	33917530	HYPO16257	0.222091	0.549733	-0.327642	0.141975	0.225738
chr16	33941741	33942790	HYPO16260	0.201931	0.553452	-0.351521	0.31759	0.252554
chr16	34807595	34808159	HYPO16276	0.26511	0.571884	-0.306774	0.344412	0.330102
chr16	35630579	35631482	HYPO16297_HYPO15275	0.262659	0.58317	-0.32051	0.363723	0.16435
chr16	37676457	37676915	HYPO16320	0.160147	0.478598	-0.31845	0.324206	0.228856
chr16	37687530	37687991	HYPO16322	0.272577	0.605474	-0.332897	0.352064	0.261205
chr16	37704866	37705490	HYPO16324	0.286911	0.645911	-0.359	0.375	0.407971
chr16	37742522	37742864	HYPO16326	0.169541	0.565844	-0.396303	0.4	0.332337
chr16	37790899	37791145	HYPO16329	0.166071	0.4935	-0.327428	0.300914	0.21553
chr16	37809396	37809767	HYPO16330	0.212631	0.55931	-0.346678	0.179441	0.299343
chr16	38368495	38368726	HYPO16345	0.126944	0.450054	-0.32311	0.154725	0.20661
chr16	38626049	38626403	HYPO16358	0.247079	0.55702	-0.309941	0.48373	0.288492
chr16	38637349	38637518	HYPO16359	0.0958333	0.61418	-0.518347	0.157828	0.176377
chr16	38688437	38688980	HYPO16364	0.173024	0.489646	-0.316622	0.423016	0.193252
chr16	38700537	38700953	HYPO16365	0.084085	0.449381	-0.365296	0.146561	0.243075
chr16	38753808	38754059	HYPO16370	0.177176	0.587663	-0.410487	0.295518	0.3835
chr16	39065443	39065819	HYPO16378	0.239327	0.678958	-0.439631	0.519728	0.636181
chr16	43236101	43236604	HYPO16397	0.231851	0.60209	-0.370239	0.269041	0.192265
chr16	45096359	45096576	HYPO16438	0.204759	0.655439	-0.45068	0.545833	0.526782
chr16	45832743	45833113	HYPO16449	0.200878	0.571823	-0.370945	0.345617	0.167742
chr16	45922531	45923225	HYPO16452	0.236793	0.560646	-0.323853	0.333929	0.164043
chr16	46034161	46034298	HYPO16456	0.177375	0.572877	-0.395502	0.413333	0.270833
chr16	49951820	49952412	HYPO16473	0.214316	0.556995	-0.342679	0.360209	0.207128
chr16	50601947	50602468	HYPO16482	0.23689	0.652741	-0.415851	0.361035	0.410333
chr16	50702230	50702418	HYPO16484	0.311231	0.80219	-0.490959	0.465256	0.424603
chr16	50752445	50752656	HYPO16487	0.240685	0.545764	-0.30508	0.30366	0.0818015
chr16	51758690	51759568	HYPO16491	0.286202	0.626098	-0.339896	0.389512	0.368666
chr16	51985639	51985816	HYPO16492	0.113815	0.564212	-0.450397	0.2157	0.398679
chr16	55556173	55556706	HYPO16502	0.249212	0.551349	-0.302137	0.41121	0.362067
chr16	55731200	55731462	HYPO16503	0.192859	0.602249	-0.40939	0.375465	0.236196
chr16	57304079	57304181	HYPO16529	0.256945	0.695971	-0.439026	0.460606	0.541392
chr16	57326864	57327433	HYPO16530	0.165818	0.574549	-0.408731	0.343033	0.293451
chr16	57641562	57641993	HYPO16539	0.179677	0.52195	-0.342273	0.325757	0.49531
chr16	58513977	58514461	HYPO16551	0.318427	0.665327	-0.3469	0.382135	0.283281
chr16	62653771	62653995	HYPO16566	0.261758	0.613576	-0.351818	0.308557	0.565052
chr16	73530360	73530705	HYPO16605	0.28678	0.615943	-0.329163	0.490129	0.356027
chr16	76454298	76454507	HYPO16622	0.195906	0.688492	-0.492586	0.273571	0.288222
chr16	78052598	78053614	HYPO16644	0.313011	0.621995	-0.308983	0.469048	0.48782
chr16	78102079	78102530	HYPO16645	0.218524	0.745727	-0.527202	0.530934	0.180075
chr16	78451725	78451896	HYPO16654	0.0704761	0.426984	-0.356508	0.195	0.180022
chr16	85133801	85134249	HYPO16676	0.125307	0.438016	-0.312709	0.0510101	0.136167
chr16	85156241	85156507	HYPO16678	0.295634	0.625017	-0.329383	0.415926	0.482801
chr16	87553055	87553717	HYPO16699	0.266493	0.574119	-0.307626	0.450955	0.24441
chr16	87611747	87611941	HYPO16702	0.256419	0.570731	-0.314312	0.392677	0.328431
chr16	87752889	87752969	HYPO16709	0.243044	0.599262	-0.356218	0.6	0.258141
chr16	89897309	89897434	HYPO16723	0.317399	0.644078	-0.326679	0.595578	0.457171
chr16	90302264	90302387	HYPO16735	0.253302	0.601742	-0.34844	0.414779	0.539703
chr16	90624294	90624903	HYPO16749	0.264371	0.574832	-0.310462	0.178015	0.15249
chr16	91130268	91130477	HYPO16769	0.302041	0.702467	-0.400426	0.484524	0.643436
chr16	91334604	91335296	HYPO16784	0.199111	0.581969	-0.382858	0.2125	0.306703
chr16	91378828	91379259	HYPO16789	0.285012	0.614709	-0.329697	0.471083	0.137316
chr16	91551375	91551688	HYPO16800	0.212771	0.609663	-0.396892	0.550264	0.429808
chr16	91558039	91558251	HYPO16802	0.324425	0.708	-0.383576	0.699822	0.456115
chr16	91863163	91863482	HYPO16815	0.282715	0.59163	-0.308916	0.325675	0.401987
chr16	92151527	92152502	HYPO16827	0.190064	0.514818	-0.324754	0.430794	0.222252
chr16	92345427	92345804	HYPO16836	0.2635	0.591361	-0.327862	0.193597	0.329664
chr16	92605724	92605974	HYPO16847	0.218221	0.683586	-0.465365	0.404502	0.243574
chr16	93329061	93329293	HYPO16868	0.102031	0.58373	-0.481699	0.288862	0.212181
chr16	93442950	93443372	HYPO16871	0.188362	0.546705	-0.358343	0.30486	0.250086
chr16	93932820	93933235	HYPO16888	0.274608	0.619231	-0.344623	0.371172	0.121571
chr16	94471691	94471961	HYPO16898	0.271591	0.794589	-0.522998	0.278061	0.433641
chr16	94529532	94529771	HYPO16902	0.289123	0.628516	-0.339393	0.528225	0.270198
chr16	94766196	94766509	HYPO16911	0.248285	0.689594	-0.441308	0.353558	0.359637
chr16	94936162	94936620	HYPO16919	0.314591	0.644535	-0.329944	0.331946	0.223744
chr16	95543695	95544057	HYPO16934	0.140005	0.460192	-0.320187	0.370599	0.322987
chr16	96056349	96056604	HYPO16951	0.25253	0.693168	-0.440639	0.225189	0.233856
chr17	3454032	3454375	HYPO17001	0.0365385	0.397267	-0.360729	0.199523	0.0808033
chr17	5799593	5799698	HYPO17036	0.274825	0.799273	-0.524447	0.817461	0.621829
chr17	5872612	5872840	HYPO17043	0.117348	0.438885	-0.321537	0.183622	0.191368
chr17	6420857	6421210	HYPO17062	0.261993	0.667356	-0.405364	0.318367	0.625541
chr17	8011192	8011414	HYPO17087	0.270958	0.573443	-0.302486	0.333135	0.475853
chr17	10193622	10194314	HYPO17135	0.134151	0.496605	-0.362454	0.212566	0.200033
chr17	12171141	12171362	HYPO17153	0.188889	0.517323	-0.328434	0.295299	0.289081
chr17	12485688	12486704	HYPO17160	0.281855	0.660002	-0.378147	0.374678	0.436588
chr17	12608060	12608726	HYPO17164	0.227255	0.572801	-0.345546	0.4	0.343418
chr17	12983509	12984628	HYPO17177	0.15792	0.497977	-0.340057	0.339294	0.198881
chr17	13748247	13749169	HYPO17190	0.249592	0.551224	-0.301632	0.277579	0.229593
chr17	14212774	14213261	HYPO17195	0.202083	0.52483	-0.322746	0.303274	0.169015
chr17	14870979	14871217	HYPO17212	0.19093	0.535382	-0.344453	0.341071	0.367424
chr17	15205123	15205261	HYPO17218	0.132142	0.477576	-0.345434	0.334415	0.199778
chr17	15546029	15546303	HYPO17226	0.256855	0.678657	-0.421802	0.469331	0.18026
chr17	15809578	15810005	HYPO17235	0.323682	0.635048	-0.311367	0.427381	0.384562
chr17	17628169	17628737	HYPO17256	0.21233	0.527485	-0.315155	0.404922	0.184879
chr17	24681648	24681964	HYPO17360	0.294974	0.622341	-0.327368	0.380183	0.232533
chr17	24780656	24781687	HYPO17363	0.240278	0.606005	-0.365727	0.277597	0.211822
chr17	24782015	24782550	HYPO17364	0.190385	0.568849	-0.378465	0.252976	0.382258
chr17	25219218	25220775	HYPO17391	0.230149	0.541663	-0.311514	0.214223	0.254164
chr17	26341926	26342459	HYPO17455	0.222168	0.702873	-0.480704	0.42403	0.267321
chr17	26562429	26562627	HYPO17462	0.0813636	0.524142	-0.442778	0.351111	0.4175
chr17	26666733	26667251	HYPO17470	0.184343	0.52125	-0.336907	0.270833	0.2821
chr17	26713596	26714476	HYPO17476	0.152116	0.589426	-0.43731	0.283707	0.240367
chr17	26721081	26722152	HYPO17477	0.195049	0.560915	-0.365865	0.285328	0.177592
chr17	26739364	26739945	HYPO17480	0.172242	0.601113	-0.428872	0.430704	0.187648
chr17	27131363	27132166	HYPO17509	0.162503	0.56125	-0.398747	0.380508	0.283996
chr17	27175359	27175803	HYPO17516	0.223363	0.564153	-0.34079	0.275	0.382983
chr17	27185426	27185863	HYPO17517	0.224433	0.59631	-0.371876	0.292547	0.167713
chr17	27559007	27559935	HYPO17534	0.179862	0.488872	-0.30901	0.14879	0.202243
chr17	27683718	27684406	HYPO17541	0.193678	0.524131	-0.330453	0.304334	0.326092
chr17	28104959	28105469	HYPO17564	0.250413	0.552341	-0.301928	0.35119	0.143756
chr17	28483043	28483298	HYPO17589	0.150794	0.505953	-0.355159	0.46875	0.208571
chr17	29008882	29009141	HYPO17622	0.236429	0.613564	-0.377136	0.298809	0.396751
chr17	29155632	29156104	HYPO17633	0.227555	0.531526	-0.30397	0.286265	0.206505
chr17	29187893	29188029	HYPO17637	0.136508	0.456097	-0.319588	0.319841	0.218268
chr17	29190713	29191265	HYPO17638	0.0599326	0.448457	-0.388524	0.142046	0.141806
chr17	29293721	29294122	HYPO17648	0.242172	0.61062	-0.368449	0.437879	0.505598
chr17	29868392	29868678	HYPO17686	0.257211	0.633333	-0.376122	0.577778	0.279444
chr17	30122434	30122751	HYPO17702	0.176428	0.552788	-0.376359	0.319307	0.346802
chr17	31369024	31369521	HYPO17726	0.1796	0.511781	-0.332181	0.391799	0.275471
chr17	31442520	31442824	HYPO17730	0.100794	0.601191	-0.500397	0.318182	0.183878
chr17	31973340	31974289	HYPO17745	0.270007	0.646743	-0.376736	0.580606	0.506899
chr17	34355608	34355765	HYPO17852	0.133658	0.478095	-0.344437	0.25	0.194359
chr17	34791999	34793123	HYPO17877	0.227654	0.604587	-0.376932	0.267903	0.14471
chr17	34812651	34813083	HYPO17881	0.126527	0.492424	-0.365897	0.372222	0.328345
chr17	34883474	34883737	HYPO17889	0.177436	0.734026	-0.55659	0.541667	0.36899
chr17	35078442	35079009	HYPO17899	0.14836	0.499626	-0.351267	0.173538	0.0514598
chr17	43213629	43214324	HYPO18066_HYPO16975	0.0998862	0.418708	-0.318822	0.219071	0.065988
chr17	43378014	43378356	HYPO18069	0.231862	0.62145	-0.389588	0.208514	0.0985708
chr17	43529155	43529300	HYPO18075	0.200132	0.578799	-0.378667	0.100392	0.236572
chr17	44237752	44238210	HYPO18093	0.117871	0.43892	-0.321048	0.209032	0.203053
chr17	44391754	44391957	HYPO18100	0.110091	0.509992	-0.399901	0.434048	0.146949
chr17	45330529	45330756	HYPO18115	0.293193	0.633878	-0.340685	0.625	0.304588
chr17	47149964	47150158	HYPO18226	0.157935	0.639475	-0.48154	0.280938	0.184714
chr17	47316075	47316443	HYPO18234	0.26926	0.65	-0.38074	0.586667	0.196429
chr17	47413011	47413372	HYPO18235	0.255	0.754894	-0.499894	0.616667	0.447159
chr17	47609437	47609753	HYPO18247	0.161672	0.496981	-0.335309	0.209533	0.154189
chr17	47654869	47655504	HYPO18253	0.155303	0.468708	-0.313405	0.269235	0.176391
chr17	47849882	47849917	HYPO18266	0	0.641667	-0.641667	NA	0.526124
chr17	49380186	49380372	HYPO18314	0.30619	0.607113	-0.300923	0.627273	0.653746
chr17	49386647	49386792	HYPO18315	0.161661	0.538152	-0.376491	0.667517	0.216607
chr17	51360373	51360743	HYPO18337	0.164358	0.538152	-0.373794	0.317919	0.443468
chr17	51444331	51444584	HYPO18338	0.234475	0.569857	-0.335382	0.45593	0.239857
chr17	51722785	51723113	HYPO18342	0.262302	0.664983	-0.402682	0.659722	0.212901
chr17	56095436	56096236	HYPO18364	0.121083	0.465253	-0.34417	0.258163	0.118108
chr17	56324970	56325673	HYPO18394	0.168766	0.497061	-0.328295	0.370238	0.241225
chr17	62906521	62906809	HYPO18475	0.283114	0.625962	-0.342849	0.43287	0.359581
chr17	64555621	64555861	HYPO18492	0.279687	0.686322	-0.406635	0.370975	0.51942
chr17	65114687	65114956	HYPO18503	0.225665	0.543202	-0.317537	0.5	0.254904
chr17	66265544	66266295	HYPO18525	0.126448	0.463096	-0.336648	0.188227	0.0717817
chr17	66280344	66280567	HYPO18526	0.142421	0.581761	-0.43934	0.536667	0.269593
chr17	66701662	66701860	HYPO18540	0.169011	0.752272	-0.583261	0.238889	0.496768
chr17	66714121	66714676	HYPO18542	0.131217	0.537246	-0.406028	0.30899	0.382316
chr17	71069310	71069586	HYPO18595	0.218485	0.59311	-0.374625	0.321284	0.29551
chr17	71342808	71343565	HYPO18611	0.275488	0.697186	-0.421698	0.347001	0.143694
chr17	71347289	71347503	HYPO18612	0.14972	0.522152	-0.372432	0.382262	0.174101
chr17	71412515	71412824	HYPO18614	0.315388	0.639058	-0.323671	0.378854	0.390659
chr17	71470128	71470346	HYPO18616	0.117778	0.43873	-0.320952	0.36	0.282051
chr17	71600482	71600825	HYPO18621	0.234671	0.616027	-0.381356	0.458479	0.199537
chr17	71634311	71635556	HYPO18623	0.27457	0.597115	-0.322545	0.5165	0.396716
chr17	72145060	72145354	HYPO18633	0.22135	0.57555	-0.354201	0.580723	0.448987
chr17	73275299	73275816	HYPO18645	0.132528	0.472675	-0.340147	0.291085	0.125978
chr17	74311458	74312744	HYPO18667	0.115402	0.428821	-0.313419	0.187302	0.271387
chr17	75266028	75266615	HYPO18679	0.214187	0.57526	-0.361072	0.11751	0.0766803
chr17	75684338	75685064	HYPO18685	0.257701	0.584946	-0.327246	0.368144	0.409299
chr17	78653411	78653812	HYPO18691	0.193723	0.689796	-0.496073	0.50368	0.548636
chr17	78698496	78698749	HYPO18693	0.158333	0.529511	-0.371177	0.275	0.22
chr17	78800681	78801732	HYPO18694	0.215992	0.527197	-0.311205	0.245932	0.207234
chr17	79850639	79851122	HYPO18715	0.209462	0.573033	-0.363571	0.219471	0.250443
chr17	81179082	81179768	HYPO18753	0.159159	0.460537	-0.301378	0.395062	0.372148
chr17	83520342	83520462	HYPO18770	0.162963	0.534605	-0.371642	0.389556	0.30199
chr17	83547699	83548034	HYPO18772	0.23101	0.558681	-0.327671	0.363055	0.440882
chr17	83687430	83687672	HYPO18779	0.123253	0.585324	-0.46207	0.320833	0.211438
chr17	84288860	84289548	HYPO18798	0.201587	0.581193	-0.379606	0.458135	0.34985
chr17	84430684	84431388	HYPO18809	0.19004	0.618828	-0.428787	0.355264	0.33838
chr17	84443671	84444814	HYPO18811	0.199351	0.607063	-0.407713	0.264286	0.333503
chr17	85057126	85057789	HYPO18829	0.285268	0.606559	-0.32129	0.529235	0.400708
chr17	86136433	86136632	HYPO18855	0.242143	0.627706	-0.385563	0.610606	0.478333
chr17	86217670	86217901	HYPO18858	0.235131	0.568192	-0.333061	0.501912	0.353174
chr17	86629370	86629805	HYPO18864	0.25797	0.754577	-0.496607	0.573319	0.350961
chr17	86656130	86656469	HYPO18865	0.244001	0.592679	-0.348678	0.209821	0.387223
chr17	86686036	86686583	HYPO18868	0.180979	0.562698	-0.381719	0.112897	0.271276
chr17	86701433	86701857	HYPO18870	0.18805	0.619577	-0.431527	0.374206	0.444041
chr17	87109916	87110230	HYPO18877	0.238584	0.565289	-0.326705	0.359237	0.387091
chr17	88717878	88718145	HYPO18932	0.229107	0.603295	-0.374187	0.515707	0.370005
chr18	4518448	4518846	HYPO18972	0.166667	0.771549	-0.604882	0.304762	0.327417
chr18	4818073	4818532	HYPO18976	0.217376	0.672258	-0.454883	0.361111	0.229001
chr18	11488729	11489116	HYPO19045	0.230203	0.556923	-0.32672	0.709286	0.347265
chr18	12073894	12074563	HYPO19056	0.173016	0.576389	-0.403373	0.0555555	0.250018
chr18	12154405	12154976	HYPO19058	0.15022	0.515335	-0.365116	0.293498	0.299641
chr18	14224758	14224944	HYPO19093	0.0381818	0.453885	-0.415704	0.333939	0.179206
chr18	14471278	14471575	HYPO19094	0.264408	0.657754	-0.393346	0.579817	0.241816
chr18	14478896	14479156	HYPO19095	0.24945	0.616414	-0.366963	0.373377	0.330342
chr18	15220238	15220516	HYPO19102	0.297042	0.699272	-0.402231	0.537803	0.384843
chr18	15328397	15328527	HYPO19107	0.180797	0.575495	-0.394697	0.353571	0.364583
chr18	15463307	15463772	HYPO19110	0.296428	0.605746	-0.309318	0.512817	0.38695
chr18	25793091	25794006	HYPO19196	0.206594	0.543748	-0.337154	0.240509	0.207937
chr18	32081603	32082012	HYPO19227	0.204167	0.567125	-0.362958	0.361003	0.533955
chr18	32083957	32084694	HYPO19228	0.188309	0.663179	-0.47487	0.4	0.427204
chr18	32507989	32508203	HYPO19243	0.201683	0.651249	-0.449566	0.58873	0.307854
chr18	32570140	32570671	HYPO19247	0.138007	0.440421	-0.302413	0.18984	0.152658
chr18	32575899	32576059	HYPO19248	0.147817	0.522973	-0.375156	0.288889	0.219385
chr18	32683382	32683622	HYPO19251	0.0884199	0.435053	-0.346633	0.263492	0.176474
chr18	32973586	32973960	HYPO19255	0.208846	0.566432	-0.357586	0.290024	0.298774
chr18	33219111	33220034	HYPO19261	0.265325	0.597532	-0.332206	0.281015	0.236854
chr18	33452457	33453105	HYPO19264	0.237474	0.561879	-0.324405	0.248569	0.257802
chr18	33607123	33608113	HYPO19267	0.195447	0.546601	-0.351154	0.227542	0.152487
chr18	33620080	33620836	HYPO19268	0.260712	0.567665	-0.306953	0.21533	0.249133
chr18	33810354	33811023	HYPO19271	0.2463	0.600315	-0.354015	0.430555	0.592973
chr18	34048434	34048695	HYPO19275	0.239728	0.564841	-0.325113	0.426732	0.317424
chr18	34617235	34617524	HYPO19295	0.214111	0.641162	-0.427051	0.494683	0.247222
chr18	36490072	36490227	HYPO19376	0.238317	0.558974	-0.320657	0.337037	0.220454
chr18	36546083	36546379	HYPO19378	0.0460859	0.498412	-0.452326	0.241089	0.145946
chr18	36667474	36667820	HYPO19383	0.227301	0.628968	-0.401667	0.200758	0.147454
chr18	36855600	36855781	HYPO19393	0.19422	0.498943	-0.304724	0.234524	0.192877
chr18	37982138	37982321	HYPO19452	0.318532	0.643146	-0.324614	0.498485	0.349819
chr18	38323098	38323456	HYPO19478	0.287353	0.686231	-0.398878	0.532504	0.310108
chr18	38575266	38575926	HYPO19501	0.250752	0.567409	-0.316657	0.311264	0.25704
chr18	38672474	38672904	HYPO19506	0.292399	0.645059	-0.35266	0.382639	0.326692
chr18	38858526	38858820	HYPO19520	0.220445	0.521303	-0.300858	0.208995	0.255622
chr18	38955274	38956005	HYPO19523	0.202907	0.516852	-0.313945	0.354193	0.272861
chr18	39347360	39347899	HYPO19537	0.16063	0.49748	-0.336849	0.135501	0.113379
chr18	40228134	40228442	HYPO19547	0.160392	0.472051	-0.311659	0.185714	0.588601
chr18	43674612	43675179	HYPO19582	0.132436	0.567659	-0.435223	0.250732	0.229495
chr18	43766312	43766654	HYPO19585	0.248859	0.618594	-0.369735	0.55754	0.445071
chr18	44661379	44661885	HYPO19591	0.189487	0.676079	-0.486592	0.354148	0.209285
chr18	52913473	52914114	HYPO19666	0.146951	0.523004	-0.376053	0.385824	0.275403
chr18	53539901	53540217	HYPO19675	0.220261	0.565226	-0.344965	0.427183	0.299267
chr18	54710154	54710732	HYPO19695	0.268599	0.606021	-0.337422	0.27596	0.289217
chr18	56370027	56370238	HYPO19713	0.197899	0.506933	-0.309034	0.413309	0.617333
chr18	56410604	56410986	HYPO19714	0.125806	0.525228	-0.399422	0.240512	0.199726
chr18	58423121	58423378	HYPO19751	0.271352	0.620829	-0.349476	0.358532	0.301287
chr18	58554614	58554927	HYPO19753	0.12276	0.609816	-0.487057	0.401146	0.178134
chr18	60905303	60905918	HYPO19785	0.208277	0.510216	-0.301939	0.394794	0.41192
chr18	60910103	60910566	HYPO19787	0.0876458	0.403744	-0.316098	0.162302	0.206555
chr18	60942649	60943094	HYPO19790	0.162197	0.472792	-0.310595	0.203333	0.080993
chr18	61108263	61108434	HYPO19797	0.209722	0.647222	-0.4375	0.383333	0.48784
chr18	61200778	61201037	HYPO19807	0.190977	0.557222	-0.366245	0.208333	0.346782
chr18	61769152	61769752	HYPO19830	0.187047	0.543303	-0.356256	0.245435	0.289347
chr18	61897004	61897245	HYPO19842	0.311889	0.630058	-0.31817	0.544227	0.192792
chr18	63083820	63084234	HYPO19866	0.213293	0.630016	-0.416722	0.572218	0.501131
chr18	64779041	64779735	HYPO19892	0.216592	0.55191	-0.335318	0.295635	0.429534
chr18	64950527	64951236	HYPO19898	0.215062	0.641963	-0.4269	0.344526	0.379249
chr18	64960862	64961922	HYPO19899	0.232262	0.542857	-0.310595	0.380195	0.193177
chr18	65664714	65665136	HYPO19910	0.199074	0.528042	-0.328968	0.447619	0.466043
chr18	65670057	65670439	HYPO19911	0.283935	0.755826	-0.471891	0.439815	0.305264
chr18	65693835	65693991	HYPO19913	0.256855	0.658096	-0.401241	0.464744	0.455533
chr18	66234581	66235450	HYPO19940	0.219492	0.520005	-0.300513	0.243705	0.308543
chr18	68271738	68271926	HYPO19985	0.269659	0.748701	-0.479043	0.446537	0.257732
chr18	68346320	68346588	HYPO19987	0.244193	0.61778	-0.373587	0.288014	0.164583
chr18	68655505	68655861	HYPO19995	0.142555	0.489562	-0.347007	0.280336	0.259005
chr18	69284429	69284922	HYPO20004	0.14147	0.525379	-0.383909	0.281101	0.138485
chr18	69676988	69677189	HYPO20012	0.191238	0.546168	-0.35493	0.439683	0.243
chr18	69681842	69682130	HYPO20014	0.26105	0.767739	-0.506689	0.216964	0.399608
chr18	69683018	69683633	HYPO20015	0.268462	0.695858	-0.427396	0.46164	0.501094
chr18	69694752	69695495	HYPO20016	0.240562	0.637665	-0.397103	0.328139	0.333172
chr18	69790144	69790429	HYPO20022	0.248811	0.549199	-0.300387	0.311591	0.295875
chr18	69796206	69796686	HYPO20023	0.216593	0.718267	-0.501674	0.308892	0.281453
chr18	69840296	69840480	HYPO20027	0.280449	0.749706	-0.469257	0.398197	0.337364
chr18	69939376	69939576	HYPO20029	0.152761	0.515439	-0.362678	0.268831	0.253354
chr18	69954063	69954824	HYPO20030	0.179243	0.524017	-0.344774	0.280288	0.177959
chr18	73330417	73330854	HYPO20050	0.0778083	0.389771	-0.311962	0.242857	0.207852
chr18	74632076	74632193	HYPO20084	0.135714	0.588788	-0.453074	0.318182	0.330769
chr18	75582934	75583137	HYPO20115	0.225264	0.668891	-0.443627	0.272487	0.154881
chr18	75697381	75697791	HYPO20124	0.201637	0.571011	-0.369374	0.248363	0.212443
chr18	75842280	75843223	HYPO20129	0.171995	0.604537	-0.432542	0.135029	0.227783
chr18	77547012	77547232	HYPO20174	0.266667	0.916667	-0.65	NA	0.573214
chr18	77726676	77726945	HYPO20177	0.164966	0.491017	-0.326052	0.409864	0.415335
chr18	77750556	77751118	HYPO20179	0.237867	0.541919	-0.304052	0.292142	0.16305
chr18	78505686	78506256	HYPO20201	0.189437	0.531272	-0.341835	0.407913	0.285703
chr18	78681346	78682679	HYPO20204	0.142692	0.489222	-0.346529	0.32217	0.220068
chr18	78692063	78692400	HYPO20206	0.107304	0.442051	-0.334747	0.195714	0.218308
chr18	80373195	80373310	HYPO20221	0.224079	0.545774	-0.321695	0.35203	0.234018
chr18	80484260	80484549	HYPO20228	0.181838	0.63064	-0.448802	0.248809	0.270565
chr18	80828171	80828726	HYPO20239	0.239762	0.604967	-0.365205	0.238784	0.285486
chr18	80835429	80835659	HYPO20240	0.2	0.636905	-0.436905	0.474286	0.48044
chr18	81845306	81845607	HYPO20263	0.212727	0.516547	-0.30382	0.15625	0.174078
chr18	82309529	82309732	HYPO20274	0.250017	0.709259	-0.459242	0.450794	0.613247
chr18	82656953	82657076	HYPO20281	0.0867375	0.466586	-0.379848	0.259931	0.284722
chr18	82661905	82663103	HYPO20282	0.251374	0.582862	-0.331489	0.525198	0.377652
chr18	82753292	82753543	HYPO20290	0.247853	0.643648	-0.395794	0.585009	0.257636
chr18	82962006	82962369	HYPO20300	0.0890652	0.58079	-0.491724	0.266828	0.211128
chr18	84925056	84925497	HYPO20343	0.121111	0.47033	-0.349219	0.403313	0.109363
chr18	85024355	85024780	HYPO20346	0.24394	0.659561	-0.415621	0.270545	0.441377
chr19	3044763	3046883	HYPO20364	0.1	0.666667	-0.566667	0.5	0.486111
chr19	3223713	3224213	HYPO20367_HYPO19079	0	0.474603	-0.474603	NA	0.237523
chr19	4745141	4745298	HYPO20449	0.221747	0.563426	-0.341679	0.316667	0.150985
chr19	5057929	5058745	HYPO20473	0.241437	0.589856	-0.348419	0.305339	0.274388
chr19	5939953	5940983	HYPO20549	0.182943	0.577757	-0.394814	0.236383	0.18063
chr19	5952137	5952813	HYPO20551	0.219269	0.591017	-0.371749	0.349579	0.348082
chr19	5954511	5954822	HYPO20552	0.132297	0.683664	-0.551367	0.270302	0.239762
chr19	5955515	5956963	HYPO20553	0.211145	0.540335	-0.32919	0.251317	0.193058
chr19	6280989	6281320	HYPO20572	0.285091	0.687866	-0.402774	0.652222	0.464418
chr19	6413100	6413250	HYPO20585	0.213413	0.778889	-0.565476	0.287226	0.441767
chr19	6922395	6923109	HYPO20606	0.150532	0.562588	-0.412056	0.302486	0.186365
chr19	7234832	7235074	HYPO20634	0.171428	0.551313	-0.379885	0.151587	0.252543
chr19	7271415	7271763	HYPO20638	0.162482	0.645833	-0.483351	0.391667	0.242906
chr19	7353030	7353950	HYPO20644	0.206233	0.51649	-0.310257	0.412169	0.386944
chr19	7497273	7498378	HYPO20651	0.115246	0.490617	-0.375371	0.427362	0.11377
chr19	8926698	8926882	HYPO20679	0.26008	0.689832	-0.429752	0.525694	0.516633
chr19	9903475	9903778	HYPO20704_HYPO19404	0	0.5	-0.5	NA	0
chr19	10369178	10369536	HYPO20730	0.163181	0.508462	-0.345281	0.196591	0.199287
chr19	16121477	16121775	HYPO20824	0.108405	0.522222	-0.413817	0.235	0.238766
chr19	16441954	16442134	HYPO20829	0.277917	0.83161	-0.553692	0.616987	0.331295
chr19	17863120	17863375	HYPO20842	0.153016	0.492857	-0.339841	0.619047	0.625882
chr19	18976997	18977175	HYPO20852	0.145099	0.612587	-0.467488	0.630952	0.22549
chr19	21180756	21181429	HYPO20860_HYPO19563	0.0585648	0.36609	-0.307525	0.223071	0.148553
chr19	23119291	23119631	HYPO20886	0.299615	0.757102	-0.457488	0.627041	0.234602
chr19	23140054	23140583	HYPO20888	0.150453	0.549514	-0.399061	0.353175	0.331154
chr19	23224806	23225432	HYPO20892	0.315175	0.65626	-0.341085	0.349074	0.465719
chr19	23772487	23773120	HYPO20903	0.235881	0.602172	-0.366291	0.313114	0.424202
chr19	23866116	23866298	HYPO20907	0.247319	0.605723	-0.358404	0.54923	0.442953
chr19	24033385	24034784	HYPO20912	0.235303	0.565527	-0.330224	0.343001	0.258583
chr19	25489714	25490637	HYPO20951	0.0914787	0.452311	-0.360832	0.352721	0.350816
chr19	25698210	25698409	HYPO20961	0.273743	0.62725	-0.353506	0.344792	0.393016
chr19	26089338	26089613	HYPO20968	0.117308	0.580517	-0.463209	0.54329	0.279114
chr19	26622445	26622841	HYPO20969	0.26099	0.612985	-0.351995	0.479845	0.542308
chr19	26640809	26641221	HYPO20970	0.168276	0.558484	-0.390208	0.116919	0.152404
chr19	26802393	26802622	HYPO20975	0.145157	0.486423	-0.341266	0.102778	0.278788
chr19	30189163	30189712	HYPO21025	0.206117	0.63773	-0.431614	0.575538	0.393272
chr19	31148993	31149475	HYPO21038	0.254056	0.697108	-0.443052	0.644825	0.338203
chr19	31435684	31436164	HYPO21040	0.169368	0.529167	-0.359799	0.196429	0.212976
chr19	32140405	32141222	HYPO21048	0.264629	0.620811	-0.356183	0.318413	0.407596
chr19	32396551	32397302	HYPO21054	0.154446	0.512376	-0.35793	0.249618	0.236785
chr19	32802135	32802639	HYPO21065	0.299323	0.62862	-0.329296	0.366667	0.299306
chr19	33188073	33188412	HYPO21073	0.263962	0.633997	-0.370035	0.400735	0.299796
chr19	33836114	33836307	HYPO21077	0	0.613518	-0.613518	0.4	0.238961
chr19	36864536	36864785	HYPO21124	0.12013	0.752778	-0.632648	0.422487	0.157085
chr19	37759019	37759325	HYPO21148	0.153439	0.58373	-0.430291	0.504048	0.299363
chr19	37761584	37761730	HYPO21149	0.21045	0.688974	-0.478525	0.23653	0.168249
chr19	37762176	37762656	HYPO21150	0.292779	0.624646	-0.331867	0.527513	0.186243
chr19	38685363	38685709	HYPO21178	0.274941	0.594811	-0.31987	0.388095	0.303466
chr19	40552199	40552938	HYPO21197	0.162861	0.475455	-0.312595	0.193158	0.245979
chr19	41267065	41267467	HYPO21221	0.272713	0.671974	-0.399262	0.372917	0.363068
chr19	42074673	42075463	HYPO21256	0.182989	0.603937	-0.420948	0.213542	0.309382
chr19	42500397	42501231	HYPO21284	0.201377	0.550699	-0.349322	0.354878	0.218986
chr19	43736756	43736960	HYPO21317	0.209765	0.642262	-0.432497	0.152597	0.309749
chr19	44051138	44051600	HYPO21332	0.217793	0.550468	-0.332675	0.555335	0.407546
chr19	44887538	44887921	HYPO21383	0.25	0.564966	-0.314966	0.258571	0.314087
chr19	45101628	45102232	HYPO21396	0.128333	0.48	-0.351667	0.290915	0.246172
chr19	45608972	45609420	HYPO21432	0.18497	0.547449	-0.362479	0.356994	0.344686
chr19	45800234	45800531	HYPO21443	0.253881	0.615598	-0.361717	0.328231	0.311676
chr19	46162529	46162910	HYPO21464	0.257211	0.595251	-0.33804	0.338257	0.160146
chr19	46551742	46552481	HYPO21488	0.331171	0.681668	-0.350497	0.344544	0.285869
chr19	46697431	46697872	HYPO21502_HYPO20167	0.243006	0.559259	-0.316253	0	0.13696
chr19	46698691	46699146	HYPO21503	0.27953	0.741711	-0.46218	0.271667	0.189251
chr19	46718253	46718699	HYPO21505	0.160436	0.510337	-0.349901	0.175061	0.256118
chr19	47376181	47376641	HYPO21533	0.176435	0.493849	-0.317414	0.307143	0.196658
chr19	47477477	47478044	HYPO21544	0.192236	0.494331	-0.302095	0.307143	0.246428
chr19	47483269	47483518	HYPO21545	0.182517	0.607504	-0.424986	0.337301	0.18
chr19	47512564	47513366	HYPO21546	0.193895	0.527268	-0.333373	0.263505	0.0734891
chr19	47535992	47536208	HYPO21549	0.196785	0.601828	-0.405043	0.390873	0.325094
chr19	47638427	47638634	HYPO21557	0.259156	0.747024	-0.487868	0.4	0.464286
chr19	47774358	47774635	HYPO21560	0.305548	0.659927	-0.354379	0.505359	0.358854
chr19	53097661	53097948	HYPO21588	0.221463	0.686582	-0.465119	0.438582	0.424339
chr19	53150554	53150760	HYPO21594	0.225838	0.600513	-0.374675	0.546409	0.595875
chr19	53255772	53256167	HYPO21600	0.255053	0.608222	-0.353169	0.411796	0.212326
chr19	53728395	53728721	HYPO21627	0.151389	0.482105	-0.330716	0.29381	0.150409
chr19	53913381	53913588	HYPO21636	0.165873	0.517511	-0.351638	0.452778	0.352222
chr19	53924847	53925449	HYPO21637	0.107861	0.416987	-0.309126	0.30242	0.0634365
chr19	56164104	56164672	HYPO21677	0.318009	0.694341	-0.376332	0.540913	0.389391
chr19	56190039	56190797	HYPO21678_HYPO20317	0.144431	0.511722	-0.36729	0.325091	0.197772
chr19	56243659	56244685	HYPO21680	0.23373	0.562698	-0.328968	0.325397	0.214449
chr19	56306520	56306876	HYPO21681	0.313492	0.674009	-0.360517	0.513776	0.217319
chr19	56585148	56586021	HYPO21693	0.173041	0.568057	-0.395016	0.373268	0.240758
chr19	57014066	57014614	HYPO21707	0.194049	0.653113	-0.459064	0.38893	0.327114
chr19	57051534	57051694	HYPO21708	0.233519	0.55303	-0.319512	0.538889	0.306254
chr19	57172238	57173744	HYPO21717	0.25765	0.573328	-0.315678	0.328008	0.180995
chr19	57184285	57185143	HYPO21718	0.19428	0.550426	-0.356146	0.470788	0.158042
chr19	57290809	57290996	HYPO21727	0.322252	0.723938	-0.401686	0.521825	0.480347
chr19	57597940	57598208	HYPO21746	0.258231	0.632567	-0.374336	0.60406	0.49354
chr19	60224863	60225544	HYPO21796	0.215002	0.525451	-0.310449	0.375561	0.188857
chr2	4283184	4283678	HYPO21839	0.192502	0.586271	-0.39377	0.286706	0.21775
chr2	4463530	4463998	HYPO21847	0.204633	0.621945	-0.417312	0.373033	0.176372
chr2	4476257	4476580	HYPO21848	0.21369	0.537169	-0.323479	0.15	0.26412
chr2	4507256	4507658	HYPO21851	0.248697	0.605187	-0.35649	0.466237	0.306087
chr2	5078166	5078789	HYPO21870	0.254894	0.585714	-0.33082	0.5219	0.426143
chr2	5569929	5570273	HYPO21875	0.256776	0.579325	-0.322549	0.518489	0.551927
chr2	6114516	6114885	HYPO21886	0.200466	0.517821	-0.317355	0.346104	0.377021
chr2	6844969	6845276	HYPO21900	0.22388	0.586355	-0.362475	0.366418	0.361012
chr2	7048257	7048790	HYPO21903_HYPO20510	0.263194	0.572424	-0.30923	0.293452	0.393115
chr2	10172186	10172535	HYPO21926	0.160108	0.58188	-0.421771	0.176314	0.256198
chr2	11416550	11416884	HYPO21940	0.174736	0.536246	-0.361511	0.182401	0.156454
chr2	12249900	12250871	HYPO21958	0.20285	0.523121	-0.32027	0.2602	0.221219
chr2	14795442	14795842	HYPO21980	0.242838	0.579125	-0.336287	0.193908	0.124067
chr2	17774526	17775160	HYPO21989	0.236436	0.598955	-0.362519	0.176823	0.216745
chr2	25032127	25032869	HYPO22094	0.219218	0.600372	-0.381154	0.254286	0.28757
chr2	25092092	25092489	HYPO22103	0.160985	0.528419	-0.367434	0.257954	0.330042
chr2	25976721	25977153	HYPO22141	0.188961	0.595238	-0.406277	0.345719	0.231966
chr2	26559908	26560297	HYPO22176	0.313619	0.628682	-0.315062	0.435786	0.355492
chr2	27409942	27410336	HYPO22205	0.233855	0.629101	-0.395246	0.142857	0.252509
chr2	27428416	27428809	HYPO22206	0.181739	0.496213	-0.314474	0.47381	0.215058
chr2	27448882	27449292	HYPO22207	0.123976	0.434336	-0.31036	0.350529	0.24219
chr2	27462256	27462625	HYPO22208	0.233622	0.53557	-0.301948	0.345106	0.319388
chr2	27554958	27555644	HYPO22211	0.0964285	0.459156	-0.362727	0.15832	0.104439
chr2	28099884	28100454	HYPO22232	0.266529	0.574048	-0.307518	0.351058	0.405538
chr2	28391388	28391520	HYPO22246	0.0780664	0.523375	-0.445308	0.0616667	0.13963
chr2	29498887	29499382	HYPO22291	0.171291	0.472621	-0.30133	0.327273	0.398433
chr2	29940015	29940354	HYPO22311	0.198781	0.604077	-0.405295	0.466975	0.331237
chr2	30211385	30212114	HYPO22322	0.23456	0.590998	-0.356438	0.352669	0.339347
chr2	30302857	30303934	HYPO22328	0.130303	0.556548	-0.426245	0.199008	0.299297
chr2	30540646	30541225	HYPO22342	0.134375	0.588095	-0.45372	0.229409	0.151497
chr2	30545756	30546204	HYPO22344	0.131452	0.456233	-0.324781	0.252381	0.326578
chr2	30923646	30924500	HYPO22379	0.226454	0.545776	-0.319322	0.26809	0.199615
chr2	31119560	31119803	HYPO22390_HYPO20988	0.147143	0.475	-0.327857	0.186667	0.25138
chr2	31160937	31161394	HYPO22395	0.231913	0.59368	-0.361767	0.421835	0.300359
chr2	31597807	31598048	HYPO22409	0.05	0.35844	-0.30844	0.0351852	0.0863426
chr2	31637486	31637828	HYPO22412	0.146577	0.49747	-0.350893	0.410714	0.397377
chr2	31664017	31664342	HYPO22414	0.154768	0.593954	-0.439186	0.207673	0.209408
chr2	32029752	32030311	HYPO22433	0.138006	0.495647	-0.357641	0.183202	0.158832
chr2	32516948	32517694	HYPO22474	0.15194	0.485498	-0.333558	0.424603	0.154625
chr2	32586500	32586596	HYPO22478	0.0475589	0.508125	-0.460566	0.0666667	0.047619
chr2	32597679	32597982	HYPO22481	0.295424	0.71688	-0.421456	0.654545	0.330543
chr2	32752042	32752472	HYPO22491	0.235646	0.580024	-0.344378	0.304487	0.19318
chr2	33138429	33139360	HYPO22506	0.153502	0.533534	-0.380033	0.428108	0.27758
chr2	33556251	33556563	HYPO22538	0.263034	0.630093	-0.367059	0.27586	0.417444
chr2	33609536	33609764	HYPO22542	0.0976107	0.433081	-0.33547	0.155556	0.155567
chr2	35496216	35496444	HYPO22603	0.292763	0.643119	-0.350355	0.291071	0.172442
chr2	35707042	35707556	HYPO22611	0.256894	0.590144	-0.33325	0.376912	0.0855617
chr2	38805742	38806281	HYPO22677	0.188433	0.531627	-0.343193	0.232857	0.235412
chr2	43969547	43970517	HYPO22694	0.313922	0.652506	-0.338584	0.267993	0.413003
chr2	44953052	44953749	HYPO22702	0.234169	0.543619	-0.309451	0.376003	0.302354
chr2	45269088	45269579	HYPO22710	0.258537	0.665636	-0.407099	0.23373	0.41769
chr2	48394519	48395786	HYPO22720	0.176901	0.489648	-0.312748	0.293781	0.27011
chr2	50797907	50799021	HYPO22735	0.266616	0.63558	-0.368965	0.349604	0.445322
chr2	50826593	50826804	HYPO22736	0.123022	0.548189	-0.425167	0.291736	0.115348
chr2	50928117	50928878	HYPO22738	0.148543	0.449422	-0.300879	0.14974	0.125923
chr2	51075321	51075708	HYPO22741	0.118605	0.478023	-0.359418	0.207686	0.262601
chr2	52850263	52851087	HYPO22767	0.238599	0.615253	-0.376654	0.310311	0.294375
chr2	58368417	58368650	HYPO22794	0.281425	0.669774	-0.38835	0.414719	0.168921
chr2	58385675	58386362	HYPO22796	0.217744	0.634778	-0.417034	0.219566	0.148135
chr2	58398863	58399307	HYPO22797	0.245085	0.667843	-0.422758	0.295503	0.455853
chr2	59365001	59365304	HYPO22810	0.27814	0.603493	-0.325353	0.152604	0.24803
chr2	59584316	59584498	HYPO22817	0.118246	0.537241	-0.418995	0.444697	0.377713
chr2	60663997	60664637	HYPO22836	0.183973	0.527525	-0.343553	0.178821	0.12687
chr2	60708576	60709350	HYPO22839	0.156729	0.496716	-0.339987	0.387698	0.252655
chr2	63809134	63809426	HYPO22874	0.24088	0.597238	-0.356358	0.417807	0.369259
chr2	65132203	65132604	HYPO22879	0.187697	0.531542	-0.343845	0.470058	0.243439
chr2	65817929	65818099	HYPO22890	0.225391	0.586607	-0.361216	0.274418	0.239422
chr2	71221995	71222181	HYPO22963	0.209984	0.602741	-0.392757	0.306122	0.362288
chr2	71892128	71892674	HYPO22988	0.280172	0.716931	-0.436759	0.391326	0.439583
chr2	72578594	72579389	HYPO23009	0.234809	0.554824	-0.320015	0.448439	0.313588
chr2	72875625	72875999	HYPO23013	0.173863	0.477659	-0.303796	0.294929	0.090232
chr2	73361055	73361522	HYPO23036	0.208604	0.570373	-0.361769	0.31211	0.395827
chr2	73559928	73560378	HYPO23048	0.133172	0.471593	-0.338421	0.152922	0.233625
chr2	74745220	74745972	HYPO23086	0.210254	0.574098	-0.363845	0.26255	0.155989
chr2	74809093	74809408	HYPO23089	0.272504	0.715158	-0.442654	0.345265	0.403764
chr2	75058989	75059301	HYPO23102	0.18284	0.75614	-0.573301	0.250282	0.242417
chr2	75610526	75611129	HYPO23123	0.181525	0.503633	-0.322108	0.263203	0.22383
chr2	83522582	83522780	HYPO23189	0.142857	0.686461	-0.543604	0.347727	0.285961
chr2	83569586	83570001	HYPO23192	0.165932	0.479412	-0.313481	0.260822	0.221275
chr2	84023984	84024691	HYPO23197	0.162609	0.47387	-0.311261	0.247354	0.152016
chr2	84026252	84026915	HYPO23198	0.232663	0.630847	-0.398184	0.367603	0.207992
chr2	84359419	84359858	HYPO23207	0.16164	0.567286	-0.405645	0.280231	0.338945
chr2	84892076	84892323	HYPO23238	0.229377	0.555878	-0.326501	0.469577	0.526556
chr2	90376756	90376994	HYPO23250	0.0950502	0.415256	-0.320206	0.221905	0.199165
chr2	90955248	90956045	HYPO23269_HYPO21820	0.0611111	0.456056	-0.394945	0.319376	0.170462
chr2	91036539	91037313	HYPO23272	0.204696	0.538369	-0.333674	0.242063	0.185574
chr2	91131522	91131801	HYPO23278	0.176649	0.665216	-0.488567	0.388809	0.228999
chr2	92194280	92195093	HYPO23310	0.190514	0.552588	-0.362075	0.274196	0.23465
chr2	92207638	92207755	HYPO23311	0.209524	0.571429	-0.361905	0.108333	0.29375
chr2	92264785	92265479	HYPO23318	0.264286	0.629762	-0.365476	0.542857	0.379993
chr2	92266790	92267113	HYPO23319	0.182265	0.550332	-0.368067	0.263177	0.30285
chr2	92332180	92332404	HYPO23326	0.220446	0.664647	-0.4442	0.289731	0.407324
chr2	92665529	92665955	HYPO23337	0.218326	0.518991	-0.300665	0.325	0.205682
chr2	92774440	92775068	HYPO23343	0.217621	0.569836	-0.352215	0.336335	0.2893
chr2	93217851	93218295	HYPO23365	0.282792	0.67761	-0.394818	0.341408	0.418723
chr2	94188286	94188748	HYPO23397	0.137446	0.503401	-0.365956	0.34966	0.219947
chr2	102006867	102007307	HYPO23424	0.174447	0.530684	-0.356237	0.166666	0.279688
chr2	102036658	102037140	HYPO23426	0.210577	0.523622	-0.313046	0.222385	0.349621
chr2	102071700	102072087	HYPO23429	0.166667	0.501508	-0.334841	0.286932	0.14197
chr2	103832939	103833308	HYPO23458	0.215405	0.614103	-0.398698	0.313194	0.324159
chr2	104949012	104949252	HYPO23478	0.0222222	0.399453	-0.377231	0.148571	0.0646464
chr2	113494895	113496070	HYPO23554	0.175936	0.684288	-0.508353	0.354878	0.358385
chr2	114323420	114323633	HYPO23567	0.25	0.625	-0.375	NA	0.5
chr2	116616874	116617028	HYPO23588	0.220099	0.688889	-0.46879	0.375675	0.427741
chr2	117215692	117216026	HYPO23605	0.138071	0.45	-0.311929	0.324242	0.36303
chr2	120478408	120478752	HYPO23711	0.147151	0.474526	-0.327375	0.22324	0.346726
chr2	125180955	125181646	HYPO23789	0.222216	0.532929	-0.310714	0.345114	0.372983
chr2	125336123	125337010	HYPO23794	0.247515	0.564623	-0.317108	0.287757	0.351752
chr2	125467704	125468462	HYPO23796	0.186571	0.494402	-0.307832	0.385346	0.266308
chr2	125860175	125860531	HYPO23804	0.315595	0.660474	-0.344878	0.256061	0.311291
chr2	126186490	126187479	HYPO23806	0.244967	0.547216	-0.302249	0.371693	0.439166
chr2	126276565	126277082	HYPO23808	0.219148	0.548209	-0.329061	0.315368	0.293608
chr2	126947733	126947993	HYPO23822	0.0608465	0.640136	-0.57929	0.469558	0.663671
chr2	127275531	127275825	HYPO23834	0.215212	0.632408	-0.417196	0.35	0.183886
chr2	127287148	127287588	HYPO23837	0.156814	0.597516	-0.440703	0.289335	0.26789
chr2	128135543	128136144	HYPO23863	0.196603	0.520747	-0.324144	0.161364	0.141321
chr2	129070602	129070831	HYPO23892	0.143043	0.459678	-0.316635	0.39744	0.325179
chr2	129938668	129939512	HYPO23909	0.177427	0.495544	-0.318117	0.383333	0.311372
chr2	130279270	130279632	HYPO23921	0.123695	0.466315	-0.34262	0.129509	0.181602
chr2	130302317	130302714	HYPO23922	0.181726	0.689286	-0.507559	0.491342	0.356373
chr2	131734095	131734590	HYPO23971	0.347222	0.696528	-0.349306	0.461111	0.698903
chr2	132332917	132333311	HYPO23998	0.238112	0.545212	-0.3071	0.387541	0.334167
chr2	132541275	132541545	HYPO24004	0.234101	0.690476	-0.456376	0.400895	0.359411
chr2	134642238	134642390	HYPO24025	0.146245	0.557545	-0.411299	0.463535	0.318127
chr2	135084695	135085071	HYPO24026	0.189418	0.586306	-0.396888	0.278388	0.393981
chr2	138109150	138109413	HYPO24062	0.0742063	0.452967	-0.37876	0.163889	0.226526
chr2	143728996	143729751	HYPO24089	0.250397	0.60118	-0.350784	0.367605	0.30245
chr2	144043101	144043360	HYPO24101	0.0518518	0.392025	-0.340173	0.0611112	0.18751
chr2	145706791	145707511	HYPO24127	0.105847	0.413507	-0.30766	0.140119	0.257801
chr2	147164270	147165033	HYPO24154	0.27194	0.620324	-0.348384	0.406489	0.493773
chr2	147473422	147473952	HYPO24161	0.267336	0.655967	-0.38863	0.494852	0.434722
chr2	151744816	151745013	HYPO24223	0.205195	0.612892	-0.407697	0.586111	0.311598
chr2	151764707	151765088	HYPO24226	0.190901	0.515519	-0.324618	0.389167	0.400289
chr2	152453870	152453996	HYPO24270	0.232804	0.539012	-0.306208	0.380014	0.229112
chr2	152462526	152463115	HYPO24271	0.288041	0.622381	-0.33434	0.465697	0.106303
chr2	152512617	152512694	HYPO24277	0.27535	0.6	-0.324651	0.670238	0.520433
chr2	152532088	152532397	HYPO24280	0.222321	0.680332	-0.458011	0.253968	0.259695
chr2	152533083	152534062	HYPO24281_HYPO22789	0.166905	0.481528	-0.314624	0.35476	0.127567
chr2	152554866	152555634	HYPO24283	0.150562	0.460714	-0.310152	0.1192	0.122459
chr2	152754052	152754268	HYPO24299	0.202814	0.537778	-0.334964	0.222222	0.299091
chr2	152897517	152898020	HYPO24314_HYPO22821	0.122442	0.441165	-0.318723	0.633784	0.193681
chr2	153113461	153113971	HYPO24325	0.192675	0.643322	-0.450647	0.422258	0.218084
chr2	155366503	155366919	HYPO24389	0.122357	0.488402	-0.366045	0.206217	0.300967
chr2	155448438	155448742	HYPO24392	0.05	0.533334	-0.483334	0.283334	0.0594405
chr2	155770837	155771080	HYPO24406	0.238239	0.660721	-0.422481	0.453752	0.196542
chr2	156567667	156568381	HYPO24438	0.212512	0.569445	-0.356933	0.373583	0.41933
chr2	156680155	156680463	HYPO24444	0.214286	0.51948	-0.305195	0.126587	0.211111
chr2	156884472	156884668	HYPO24451	0.142857	0.487816	-0.344959	0.178968	0.119308
chr2	156899146	156902148	HYPO24455	0.170031	0.519113	-0.349082	0.314799	0.222244
chr2	157377864	157378490	HYPO24469	0.336661	0.639134	-0.302472	0.421875	0.365866
chr2	157386931	157387325	HYPO24470	0.257037	0.572796	-0.315759	0.486647	0.384651
chr2	158049206	158049684	HYPO24504	0.188571	0.702365	-0.513794	0.398578	0.3607
chr2	158538133	158538525	HYPO24530	0.147227	0.611395	-0.464167	0.236394	0.350949
chr2	159442299	159443037	HYPO24541	0.199634	0.52626	-0.326627	0.501191	0.527761
chr2	160525893	160526328	HYPO24564	0.108082	0.409259	-0.301177	0.146958	0.175497
chr2	162726337	162726913	HYPO24584	0.25016	0.575	-0.32484	0.343635	0.3564
chr2	163212699	163213224	HYPO24610	0.187635	0.51441	-0.326775	0.394527	0.32131
chr2	165227564	165227916	HYPO24755	0.0935374	0.462461	-0.368924	0.125541	0.214418
chr2	165761646	165761911	HYPO24787	0.108774	0.555823	-0.447049	0.202257	0.125262
chr2	165900118	165900432	HYPO24798	0.184061	0.684432	-0.500372	0.255952	0.339274
chr2	165998332	165998428	HYPO24802	0.215873	0.647222	-0.431349	0.200463	0.414666
chr2	166106988	166107355	HYPO24805	0.117143	0.5	-0.382857	0.5	0.128571
chr2	166259078	166259366	HYPO24815	0.12018	0.423319	-0.30314	0.24	0.131046
chr2	167057391	167057865	HYPO24852	0.244941	0.611791	-0.366851	0.266964	0.233641
chr2	167225275	167225461	HYPO24860	0.235136	0.715455	-0.480319	0.604445	0.337268
chr2	167419685	167421639	HYPO24877	0.230136	0.57186	-0.341724	0.276295	0.305705
chr2	167539078	167539396	HYPO24890	0.196248	0.512437	-0.316189	0.26231	0.210153
chr2	167686154	167686416	HYPO24901	0.02	0.557936	-0.537937	0.154365	0.0944234
chr2	167702837	167703255	HYPO24904	0.236742	0.739091	-0.502349	0.398889	0.198351
chr2	167725454	167725977	HYPO24908	0.264468	0.703035	-0.438567	0.533364	0.298154
chr2	167932454	167932698	HYPO24917	0.152448	0.483764	-0.331317	0.39324	0.188814
chr2	167992666	167992873	HYPO24925	0.135	0.435714	-0.300714	0.263333	0.253035
chr2	168317279	168317598	HYPO24943	0.230026	0.542196	-0.31217	0.326455	0.264009
chr2	168369605	168370066	HYPO24946	0.178405	0.524439	-0.346035	0.152543	0.150694
chr2	168484078	168484440	HYPO24954	0.176768	0.686209	-0.509442	0.339109	0.227602
chr2	168967820	168968212	HYPO24977	0.317754	0.646485	-0.328732	0.232143	0.371734
chr2	168983658	168984373	HYPO24979	0.19252	0.586225	-0.393705	0.283847	0.293458
chr2	169349476	169349846	HYPO24985	0.212629	0.688244	-0.475615	0.470882	0.449089
chr2	169466790	169467336	HYPO24988	0.30377	0.795394	-0.491624	0.471151	0.325771
chr2	169480861	169481763	HYPO24989	0.271168	0.587349	-0.316182	0.330383	0.357111
chr2	169496499	169497077	HYPO24992	0.284721	0.707693	-0.422971	0.568732	0.468979
chr2	169576213	169577175	HYPO24997	0.255487	0.558958	-0.303471	0.270146	0.166952
chr2	169770256	169770573	HYPO23501_HYPO25004	0.0921053	0.881429	-0.789323	0.310516	0.165079
chr2	169950772	169951953	HYPO25017	0.198841	0.521764	-0.322924	0.253247	0.346205
chr2	170084056	170084225	HYPO25032	0.164883	0.554865	-0.389982	0.39857	0.106019
chr2	170155423	170155790	HYPO25040	0.143836	0.529451	-0.385615	0.306428	0.3179
chr2	170156074	170156421	HYPO25041	0.163939	0.588257	-0.424318	0.352094	0.310589
chr2	170263910	170264570	HYPO25047	0.228792	0.547546	-0.318754	0.340677	0.310046
chr2	170582778	170583054	HYPO25061	0.259807	0.640404	-0.380597	0.420918	0.249973
chr2	170945775	170945993	HYPO25068	0.261111	0.625	-0.363889	0.5	0.748586
chr2	171665533	171665773	HYPO25072	0.167803	0.564236	-0.396433	0.66422	0.578877
chr2	171829755	171830312	HYPO25074	0.310927	0.642525	-0.331598	0.385801	0.422049
chr2	172711417	172711779	HYPO25117	0.256548	0.638691	-0.382143	0.531519	0.386451
chr2	172790774	172790943	HYPO25120	0.270188	0.573718	-0.30353	0.333002	0.343358
chr2	173179700	173179737	HYPO25144	0	0.744444	-0.744444	0.886995	0.455755
chr2	173833730	173834225	HYPO25161	0.240394	0.666414	-0.42602	0.478135	0.241987
chr2	173883806	173884237	HYPO25162	0.224585	0.588023	-0.363438	0.475108	0.448885
chr2	174125356	174125538	HYPO25171	0.282234	0.700832	-0.418598	0.494275	0.296239
chr2	174425364	174425659	HYPO25184	0.202155	0.551637	-0.349482	0.224181	0.22376
chr2	174702595	174703266	HYPO25190	0.266497	0.705576	-0.43908	0.575108	0.707825
chr2	181411937	181412636	HYPO25331	0.170238	0.517684	-0.347446	0.228571	0.258974
chr3	8629936	8629996	HYPO25360	0.319047	0.884722	-0.565675	0.5	0.607738
chr3	9159161	9159354	HYPO25378	0.200577	0.510147	-0.30957	0.574545	0.197493
chr3	10205686	10206904	HYPO25402	0.278816	0.646644	-0.367828	0.344095	0.35915
chr3	18115353	18115580	HYPO25436	0.307459	0.719546	-0.412087	0.329308	0.410204
chr3	18525886	18526091	HYPO25439	0.273148	0.576438	-0.303289	0.196093	0.313006
chr3	19467033	19467426	HYPO25448	0.0495222	0.405416	-0.355894	0.131341	0.184324
chr3	27103903	27104528	HYPO25473	0.109679	0.43061	-0.320931	0.149658	0.243582
chr3	31090277	31090673	HYPO25539	0.175717	0.627333	-0.451616	0.605241	0.311758
chr3	31398021	31398506	HYPO25542	0.241728	0.544542	-0.302814	0.555195	0.359742
chr3	31972856	31973052	HYPO25547	0.283018	0.709279	-0.426261	0.435606	0.424443
chr3	34230554	34230985	HYPO25575	0.22531	0.539667	-0.314356	0.383081	0.237741
chr3	36342079	36342810	HYPO25608	0.240049	0.560077	-0.320028	0.362759	0.289105
chr3	36431771	36432305	HYPO25617	0.226984	0.586193	-0.359209	0.266667	0.433292
chr3	36962466	36962564	HYPO25627	0.302315	0.605508	-0.303193	0.522619	0.468776
chr3	36962675	36962743	HYPO25628	0.25671	0.582091	-0.325381	0.325595	0.422016
chr3	37485002	37486057	HYPO25638_HYPO24115	0.189532	0.527234	-0.337702	0.179581	0.209174
chr3	37773733	37775226	HYPO25654	0.24054	0.540541	-0.300001	0.443847	0.278149
chr3	37815468	37816371	HYPO25657	0.182802	0.558302	-0.375501	0.298474	0.357208
chr3	38134476	38134933	HYPO25669	0.253136	0.621647	-0.368511	0.360069	0.2293
chr3	38835434	38836288	HYPO25676	0.227538	0.627116	-0.399578	0.285207	0.364781
chr3	40486401	40486651	HYPO25685	0.234454	0.534549	-0.300095	0.328369	0.235675
chr3	41385132	41385375	HYPO25701	0.264957	0.583348	-0.318391	0.374603	0.385161
chr3	51716110	51716348	HYPO25759	0.137973	0.685825	-0.547852	0.286607	0.31207
chr3	51745837	51746043	HYPO25761	0.125082	0.429819	-0.304738	0.258889	0.135577
chr3	51984412	51985033	HYPO25768	0.0508303	0.392577	-0.341747	0.166931	0.201116
chr3	52161373	52161681	HYPO25779	0.285435	0.721273	-0.435838	0.461771	0.45634
chr3	52267941	52268283	HYPO25782	0.202778	0.566804	-0.364026	0.34127	0.364613
chr3	54236316	54236821	HYPO25816	0.256988	0.581011	-0.324023	0.545695	0.462614
chr3	57376104	57377023	HYPO25858	0.314374	0.740917	-0.426543	0.369061	0.331165
chr3	58791059	58791411	HYPO25884	0.229224	0.551436	-0.322212	0.290848	0.267288
chr3	60815755	60816399	HYPO25901	0.171349	0.482576	-0.311226	0.411623	0.521862
chr3	63698190	63698381	HYPO25915	0.188604	0.701378	-0.512774	0.651571	0.475083
chr3	65259679	65260049	HYPO25927	0.221543	0.639174	-0.41763	0.258796	0.229152
chr3	67325954	67326029	HYPO25962	0.114286	0.457778	-0.343492	0.248917	0.229487
chr3	68380473	68380785	HYPO25976	0.215816	0.570833	-0.355017	0.386735	0.169225
chr3	68387121	68387786	HYPO25977	0.203093	0.525022	-0.321929	0.283871	0.294992
chr3	69197030	69197350	HYPO25992	0.157945	0.704793	-0.546848	0.297836	0.521008
chr3	69815194	69815652	HYPO26000	0.287552	0.592308	-0.304756	0.47123	0.283423
chr3	75664737	75664893	HYPO26013	0.187525	0.57555	-0.388025	0.432634	0.241042
chr3	78703527	78704175	HYPO26017	0.26436	0.613805	-0.349445	0.407471	0.298665
chr3	79707745	79708192	HYPO26047	0.244225	0.554004	-0.309779	0.347222	0.212164
chr3	83015973	83016809	HYPO26072	0.205238	0.533568	-0.32833	0.326798	0.363435
chr3	83374544	83375146	HYPO26076	0.30348	0.632628	-0.329148	0.572433	0.534834
chr3	84019273	84019428	HYPO26091	0.230489	0.659358	-0.428869	0.409259	0.276624
chr3	84019917	84020263	HYPO26092	0.23195	0.628895	-0.396945	0.260994	0.488058
chr3	84242004	84242451	HYPO26106	0.184806	0.572222	-0.387416	0.471728	0.392147
chr3	84276852	84277943	HYPO26108	0.243866	0.548904	-0.305038	0.23393	0.243667
chr3	84430600	84430925	HYPO26113	0.164444	0.682222	-0.517778	0.19	0.314889
chr3	84459063	84459625	HYPO26116	0.234863	0.548765	-0.313902	0.271131	0.29082
chr3	84978435	84978883	HYPO26123	0.173832	0.509021	-0.335189	0.395563	0.220372
chr3	84989976	84990141	HYPO26124	0.201923	0.656177	-0.454254	0.336339	0.243215
chr3	84993737	84993993	HYPO26126	0.194589	0.555596	-0.361007	0.430952	0.379657
chr3	86342718	86343113	HYPO26137	0.202332	0.643651	-0.441318	0.216667	0.294841
chr3	87778173	87778557	HYPO26181	0.2752	0.705165	-0.429965	0.199214	0.261101
chr3	87966206	87966380	HYPO26197	0.194066	0.710005	-0.515939	0.418269	0.419619
chr3	88253485	88253963	HYPO26221	0.248791	0.657438	-0.408646	0.323822	0.292817
chr3	88293889	88294781	HYPO26226	0.150427	0.495096	-0.344668	0.308492	0.256976
chr3	88956506	88956677	HYPO26259	0.301613	0.674142	-0.372529	0.511458	0.264538
chr3	89417599	89418235	HYPO26292	0.207459	0.535105	-0.327646	0.196585	0.171006
chr3	89672416	89672652	HYPO26305	0.178907	0.59732	-0.418413	0.100463	0.137414
chr3	90329668	90330595	HYPO26336	0.242446	0.544092	-0.301646	0.440378	0.237712
chr3	94175627	94176850	HYPO26364	0.118267	0.492597	-0.374331	0.241724	0.0629896
chr3	97115880	97116316	HYPO26517	0.16533	0.481195	-0.315865	0.093613	0.203146
chr3	97487618	97487860	HYPO26525	0.183036	0.495686	-0.31265	0.306968	0.0498106
chr3	100221807	100222081	HYPO26572	0.221423	0.579752	-0.358329	0.221429	0.228515
chr3	100715177	100715704	HYPO26579	0.240427	0.661996	-0.42157	0.409219	0.299457
chr3	100874285	100874729	HYPO26584	0.252525	0.575301	-0.322776	0.39801	0.349053
chr3	101202217	101202679	HYPO26597	0.203438	0.520148	-0.31671	0.312026	0.189091
chr3	102275320	102276115	HYPO26626	0.216667	0.612718	-0.396052	0.463209	0.363095
chr3	102950404	102950619	HYPO26642	0.185218	0.597833	-0.412614	0.188988	0.291297
chr3	105349475	105349962	HYPO26701	0.165575	0.503857	-0.338282	0.206643	0.295856
chr3	105499186	105499669	HYPO26704	0.240719	0.665303	-0.424585	0.222781	0.256916
chr3	105628282	105629408	HYPO26709	0.152332	0.465263	-0.312932	0.217051	0.185654
chr3	105680354	105681015	HYPO26711	0.228451	0.636091	-0.40764	0.308153	0.250488
chr3	107059794	107060241	HYPO26729	0.192046	0.576807	-0.38476	0.236054	0.32071
chr3	107450842	107451009	HYPO26746	0.0555556	0.47619	-0.420635	0.196429	0.0767543
chr3	107578785	107579441	HYPO26752	0.172727	0.486071	-0.313344	0.238034	0.45
chr3	107628484	107629038	HYPO26757	0.203144	0.565413	-0.362269	0.232376	0.420412
chr3	107644104	107644793	HYPO26759	0.28202	0.656901	-0.374881	0.592284	0.375793
chr3	107653063	107653915	HYPO26760	0.285468	0.617297	-0.331829	0.330706	0.24735
chr3	107746421	107746768	HYPO26766	0.100809	0.427381	-0.326572	0.483756	0.206588
chr3	107816143	107816639	HYPO26769	0.08	0.479346	-0.399346	0.4	0.214286
chr3	108658063	108658703	HYPO26811	0.25065	0.57786	-0.327211	0.399462	0.343949
chr3	108658849	108659147	HYPO26812	0.0484849	0.472295	-0.42381	0.0666666	0.142256
chr3	109169321	109169738	HYPO26831	0.196332	0.50338	-0.307048	0.213034	0.181632
chr3	114783623	114784087	HYPO26841	0.103334	0.467182	-0.363848	0.283333	0.180529
chr3	115913262	115914339	HYPO26858	0.198609	0.520225	-0.321617	0.22756	0.218116
chr3	115924761	115925093	HYPO26859	0.189265	0.564662	-0.375397	0.29798	0.192737
chr3	116608896	116609244	HYPO26875	0.298493	0.599005	-0.300513	0.457427	0.465243
chr3	119652014	119652370	HYPO26888	0.288436	0.610507	-0.322071	0.208081	0.121615
chr3	120589399	120589729	HYPO26891	0.141392	0.475926	-0.334534	0.187585	0.119466
chr3	120686218	120686611	HYPO26892	0.258302	0.572619	-0.314317	0.244048	0.230783
chr3	120953960	120954379	HYPO26895	0.287434	0.596717	-0.309283	0.130484	0.11587
chr3	121052714	121052873	HYPO26903	0.189489	0.640895	-0.451406	0.277323	0.444066
chr3	121093495	121093904	HYPO26905	0.235714	0.709524	-0.47381	0.3625	0.326587
chr3	121136783	121137852	HYPO26907	0.195267	0.516691	-0.321424	0.200022	0.302086
chr3	121142452	121143104	HYPO26908	0.262192	0.619327	-0.357135	0.436156	0.337443
chr3	121229302	121229787	HYPO26912	0.259919	0.593353	-0.333434	0.291026	0.305286
chr3	121307605	121307920	HYPO26916	0.150256	0.519164	-0.368908	0.259444	0.330743
chr3	121366241	121366541	HYPO26919	0.0333333	0.390769	-0.357436	0.261905	0.148205
chr3	121617359	121618449	HYPO26926	0.165363	0.516142	-0.350779	0.273939	0.28674
chr3	121736147	121737356	HYPO26929	0.264895	0.585924	-0.321029	0.343893	0.319618
chr3	121749270	121749999	HYPO26931	0.294036	0.619864	-0.325829	0.190212	0.268122
chr3	121776041	121776128	HYPO26934	0.0904762	0.56128	-0.470803	0.402778	0.289773
chr3	121821399	121821747	HYPO26936	0.196162	0.572742	-0.37658	0.290713	0.263485
chr3	122116827	122117293	HYPO26944	0.166747	0.466789	-0.300042	0.136293	0.216765
chr3	122810754	122811072	HYPO26959	0.188835	0.585015	-0.39618	0.181945	0.117813
chr3	122977613	122977903	HYPO26967	0.123302	0.491453	-0.368151	0.327457	0.422499
chr3	122991873	122992349	HYPO26968	0.130518	0.491314	-0.360797	0.412434	0.251786
chr3	123132661	123133056	HYPO26973	0.261001	0.654883	-0.393882	0.158247	0.29678
chr3	129330074	129330617	HYPO27030	0.217288	0.586019	-0.368731	0.286616	0.363179
chr3	131067402	131068372	HYPO27068	0.233682	0.598512	-0.36483	0.2612	0.228165
chr3	132574563	132575041	HYPO27083	0.237639	0.706012	-0.468372	0.394759	0.462208
chr3	133180316	133180737	HYPO27087	0.244834	0.743488	-0.498654	0.293982	0.253923
chr3	135741213	135742055	HYPO27124	0.181074	0.610412	-0.429338	0.295833	0.29697
chr3	136496724	136497321	HYPO27129	0.168315	0.494246	-0.325931	0.338182	0.296168
chr3	136813376	136814070	HYPO27130	0.22081	0.536999	-0.31619	0.299923	0.402584
chr3	137224298	137224743	HYPO27134	0.107051	0.543333	-0.436282	0.524603	0.434361
chr3	138175974	138176418	HYPO27155	0.283054	0.721778	-0.438725	0.536724	0.38631
chr3	138440320	138440730	HYPO27160	0.179391	0.57872	-0.399328	0.464184	0.476818
chr3	138463854	138464329	HYPO27161	0.207692	0.673037	-0.465346	0.24329	0.412296
chr3	138971239	138971543	HYPO27167	0.151496	0.452221	-0.300725	0.25304	0.274914
chr3	143294212	143294467	HYPO27197	0.306953	0.711353	-0.4044	0.474448	0.37362
chr3	143860138	143860513	HYPO27199	0.241657	0.698329	-0.456671	0.366667	0.368328
chr3	144983873	144984027	HYPO27221	0.126316	0.452715	-0.326399	0.0666666	0.49596
chr3	146929376	146929842	HYPO27274	0.183356	0.78797	-0.604615	0.641595	0.408796
chr3	148621251	148621590	HYPO27280	0.268715	0.649619	-0.380905	0.377146	0.559104
chr3	151814787	151815084	HYPO27306	0.158497	0.47904	-0.320544	0.445714	0.174921
chr3	152132420	152132768	HYPO27318	0.267406	0.691631	-0.424225	0.497159	0.588355
chr3	152940106	152940302	HYPO27329	0.275956	0.612297	-0.336341	0.420944	0.277056
chr3	152959366	152959766	HYPO27330	0.23319	0.565496	-0.332306	0.340819	0.35575
chr3	153059435	153059751	HYPO27331	0.17438	0.538592	-0.364212	0.242548	0.314034
chr3	153378532	153378946	HYPO27335	0.271703	0.620111	-0.348408	0.443452	0.348221
chr3	154426534	154427274	HYPO27359	0.264924	0.621513	-0.356588	0.369841	0.31324
chr4	3253350	3254469	HYPO27378	0.2	0.928571	-0.728572	0.433333	0.791667
chr4	4650856	4651341	HYPO27396	0.275636	0.628003	-0.352368	0.247596	0.418362
chr4	8437361	8437708	HYPO27417	0.125761	0.52628	-0.400519	0.342728	0.188055
chr4	9316662	9316818	HYPO27438	0.270578	0.708936	-0.438358	0.622706	0.824221
chr4	11935173	11935466	HYPO27482	0.0509396	0.406926	-0.355987	0.282295	0.257516
chr4	14225226	14225460	HYPO27502	0.223394	0.569643	-0.346249	0.362103	0.421117
chr4	19799247	19799458	HYPO27529	0	0.445716	-0.445716	0.110668	0.0554601
chr4	32648548	32648960	HYPO27583	0.181961	0.498721	-0.31676	0.345878	0.291593
chr4	34284675	34284821	HYPO27614	0.146753	0.485833	-0.33908	0.260317	0.188049
chr4	34854400	34854557	HYPO27623	0.262487	0.673497	-0.411009	0.385911	0.411305
chr4	34960152	34960667	HYPO27625	0.262612	0.574916	-0.312304	0.172959	0.239596
chr4	35012751	35013009	HYPO27626	0.240152	0.62531	-0.385159	0.346892	0.206243
chr4	40988029	40988374	HYPO27658	0.19881	0.58174	-0.382931	0.0722943	0.277155
chr4	41583523	41583968	HYPO27682	0.158692	0.47483	-0.316138	0.285714	0.200327
chr4	41803846	41804785	HYPO27705	0.308928	0.624107	-0.315179	0.25	0.375505
chr4	42078509	42078880	HYPO27708	0.157242	0.493192	-0.335951	0.182695	0.116805
chr4	43407085	43407823	HYPO27728	0.177086	0.506877	-0.329791	0.100942	0.116079
chr4	43531895	43532069	HYPO27743	0.286565	0.612438	-0.325873	0.381449	0.2788
chr4	43744002	43744616	HYPO27758	0.302309	0.655156	-0.352846	0.330218	0.490282
chr4	43991082	43992170	HYPO27769	0.237734	0.557611	-0.319878	0.275992	0.179114
chr4	44515230	44515773	HYPO27787	0.21192	0.521029	-0.309109	0.357804	0.377053
chr4	45405577	45405811	HYPO27814	0.146506	0.466946	-0.32044	0.302936	0.189122
chr4	45474494	45474959	HYPO27818	0.258904	0.655234	-0.39633	0.26215	0.25899
chr4	46320247	46320509	HYPO27858	0.22893	0.697727	-0.468797	0.579932	0.206136
chr4	46787416	46787802	HYPO27882	0.222294	0.609193	-0.386899	0.364013	0.203045
chr4	47246389	47246730	HYPO27895	0.163664	0.484028	-0.320364	0.374182	0.211203
chr4	47448940	47449098	HYPO27903	0.267172	0.575214	-0.308042	0.416422	0.372768
chr4	49405996	49406311	HYPO27925	0.189514	0.58545	-0.395936	0.222871	0.50201
chr4	49597122	49597644	HYPO27930	0.262199	0.611953	-0.349754	0.204274	0.205382
chr4	53168403	53168658	HYPO27942	0.293446	0.632273	-0.338826	0.411667	0.470734
chr4	53276689	53277417	HYPO27949	0.171981	0.548528	-0.376548	0.127747	0.0851004
chr4	54337989	54338638	HYPO27967	0.271801	0.690792	-0.41899	0.29245	0.388144
chr4	54368458	54369142	HYPO27969	0.194839	0.627684	-0.432845	0.514913	0.230581
chr4	55138125	55138912	HYPO27980	0.185312	0.50714	-0.321828	0.263131	0.168918
chr4	55217231	55217360	HYPO27981	0.128572	0.525641	-0.397069	0.346825	0.529375
chr4	55575634	55576328	HYPO27991	0.288536	0.635796	-0.347261	0.399872	0.426786
chr4	55762895	55763329	HYPO27995	0.13316	0.522121	-0.388961	0.399584	0.134019
chr4	57331518	57332113	HYPO28021	0.0717929	0.424789	-0.352996	0.159405	0.142965
chr4	57771034	57771272	HYPO28031	0.136364	0.481586	-0.345222	0.321453	0.0699574
chr4	57859019	57859529	HYPO28037	0.192063	0.608514	-0.41645	0.220798	0.119506
chr4	58426294	58426869	HYPO28048	0.215414	0.659616	-0.444201	0.439604	0.436545
chr4	58513938	58514125	HYPO28050	0.289401	0.621001	-0.331601	0.501589	0.656224
chr4	58580963	58581488	HYPO28053	0.180403	0.575164	-0.394761	0.225132	0.441177
chr4	59336202	59336433	HYPO28070	0.0882937	0.429383	-0.341089	0.107143	0.322532
chr4	59342317	59343016	HYPO28071	0.313484	0.632534	-0.31905	0.303571	0.437572
chr4	62330587	62331114	HYPO28111	0.130837	0.433815	-0.302978	0.0939153	0.194563
chr4	62366051	62366329	HYPO28115	0.159295	0.632769	-0.473474	0.280952	0.26576
chr4	62397438	62397692	HYPO28117	0.155555	0.720068	-0.564513	0.252154	0.209137
chr4	62882857	62883127	HYPO28129	0.241799	0.602272	-0.360474	0.520996	0.438948
chr4	69881013	69881770	HYPO28160	0.276664	0.63614	-0.359476	0.0885418	0.193348
chr4	81390532	81391337	HYPO28189	0.141398	0.52111	-0.379713	0.304038	0.253203
chr4	81646740	81647182	HYPO28193	0.284255	0.788081	-0.503826	0.430417	0.474944
chr4	81913640	81914230	HYPO28195	0.189827	0.604915	-0.415088	0.348413	0.241493
chr4	82079858	82080374	HYPO28198	0.285556	0.642778	-0.357222	0.530381	0.30101
chr4	82083826	82084078	HYPO28199	0.11187	0.506409	-0.394539	0.223496	0.12314
chr4	82093009	82093503	HYPO28200	0.109406	0.433697	-0.324292	0.210498	0.101601
chr4	82129313	82130077	HYPO28202	0.235192	0.539363	-0.304171	0.228132	0.30655
chr4	83844996	83845255	HYPO28232	0.253138	0.670385	-0.417246	0.411458	0.288354
chr4	84413992	84414563	HYPO28240	0.185991	0.53514	-0.349149	0.248742	0.153498
chr4	84432723	84433056	HYPO28241	0.171153	0.519286	-0.348133	0.222619	0.191793
chr4	88418764	88419798	HYPO28294_HYPO26620	0.208482	0.75	-0.541518	0.35	0.194444
chr4	94412071	94413901	HYPO28340	0.22955	0.589559	-0.36001	0.380368	0.279893
chr4	94419176	94419715	HYPO28341	0.0942969	0.488449	-0.394152	0.215675	0.247913
chr4	97356150	97357001	HYPO28363	0.172855	0.555075	-0.38222	0.237668	0.171998
chr4	98523565	98524150	HYPO28390	0.261856	0.680303	-0.418447	0.399408	0.257735
chr4	99842995	99843480	HYPO28414	0.191641	0.515543	-0.323903	0.350397	0.285498
chr4	102972042	102972416	HYPO28467	0.182868	0.664189	-0.481321	0.431094	0.313204
chr4	103409991	103410408	HYPO28470	0.193322	0.544727	-0.351406	0.637077	0.391606
chr4	104847932	104848455	HYPO28478	0.148028	0.46302	-0.314992	0.226701	0.343629
chr4	104985309	104986170	HYPO28486	0.239595	0.568795	-0.329199	0.381317	0.440898
chr4	106279418	106279805	HYPO28497	0.112191	0.421948	-0.309756	0.234524	0.0724301
chr4	106539427	106539614	HYPO28512	0.100556	0.439646	-0.339091	0.22	0.571667
chr4	106609134	106609635	HYPO28515	0.237653	0.541306	-0.303653	0.24544	0.312936
chr4	106659017	106659343	HYPO28516	0.24779	0.57996	-0.33217	0.223221	0.226853
chr4	106781109	106781349	HYPO28521	0.247487	0.558203	-0.310716	0.373809	0.141679
chr4	107140976	107141133	HYPO28533	0.25335	0.563018	-0.309668	0.235994	0.297493
chr4	107359736	107360011	HYPO28539	0.121428	0.472222	-0.350794	0.307143	0.366623
chr4	107594072	107595127	HYPO28548	0.221358	0.564871	-0.343513	0.223103	0.23438
chr4	107698122	107698279	HYPO28555	0.18	0.533333	-0.353333	0.133333	0.103587
chr4	108911074	108911332	HYPO28583	0.148056	0.470357	-0.322301	0.478836	0.432151
chr4	114149830	114150208	HYPO28617	0.27557	0.603374	-0.327804	0.334905	0.405192
chr4	114321522	114321580	HYPO28620	0.123333	0.506623	-0.38329	0.265	0.233213
chr4	116712632	116712865	HYPO28694	0.0572925	0.372558	-0.315265	0.0748918	0.130334
chr4	116985239	116985379	HYPO28709	0.284211	0.651587	-0.367376	0.507143	0.252379
chr4	116990528	116990797	HYPO28711	0.238362	0.577065	-0.338704	0.318956	0.216432
chr4	117064488	117064846	HYPO28717	0.13663	0.514042	-0.377412	0.155844	0.231272
chr4	117938292	117938435	HYPO28746	0.116402	0.5625	-0.446098	0.497619	0.23022
chr4	118118340	118119061	HYPO28756	0.150084	0.467711	-0.317627	0.215694	0.215026
chr4	118745544	118745648	HYPO28771	0.219577	0.519841	-0.300264	0.375	0.40625
chr4	124294323	124294664	HYPO28929	0.220746	0.564833	-0.344087	0.264376	0.372271
chr4	124630937	124631259	HYPO28960	0.17987	0.684243	-0.504373	0.387895	0.27049
chr4	124649685	124650287	HYPO28962	0.197285	0.732804	-0.535519	0.337532	0.439953
chr4	125929389	125929984	HYPO29050	0.241613	0.581882	-0.34027	0.320679	0.395941
chr4	125991645	125991842	HYPO29060	0.232764	0.601252	-0.368488	0.553704	0.386048
chr4	128406780	128407616	HYPO29126	0.185936	0.505583	-0.319647	0.235651	0.173993
chr4	128472944	128473107	HYPO29129	0.215476	0.547619	-0.332143	0.25	0.161866
chr4	128693334	128693760	HYPO29146	0.182119	0.54901	-0.366891	0.340179	0.369079
chr4	128821735	128822256	HYPO29160	0.287277	0.6359	-0.348623	0.154138	0.21027
chr4	128924086	128924265	HYPO29163	0.0814815	0.4079	-0.326419	0.0208333	0.128353
chr4	129849168	129850139	HYPO29221	0.190637	0.512762	-0.322125	0.214377	0.189395
chr4	131621949	131622289	HYPO29286	0.139881	0.521104	-0.381223	0.201058	0.287401
chr4	131967414	131967923	HYPO29305	0.18171	0.508829	-0.327119	0.293651	0.232038
chr4	132576848	132577429	HYPO29332	0.283333	0.6	-0.316667	0.488889	0.537037
chr4	132649706	132650246	HYPO29342	0.125	0.525018	-0.400018	NA	0.218115
chr4	132756298	132756533	HYPO29354	0.2008	0.586482	-0.385682	0.395	0.432366
chr4	132759849	132760635	HYPO29355	0.203742	0.527767	-0.324026	0.423356	0.22602
chr4	132782047	132782457	HYPO29360	0.109983	0.471797	-0.361815	0.415183	0.270162
chr4	132944920	132945281	HYPO29370	0.268299	0.595613	-0.327314	0.47598	0.335293
chr4	133715997	133716176	HYPO29430	0.093254	0.465354	-0.3721	0.379121	0.328417
chr4	134588423	134588690	HYPO29502	0.293497	0.634403	-0.340905	0.345058	0.301088
chr4	134731246	134732318	HYPO29511	0.191469	0.529996	-0.338527	0.312209	0.192057
chr4	134814068	134814702	HYPO29515	0.244288	0.547323	-0.303035	0.319121	0.356024
chr4	135384439	135384807	HYPO29554	0.2481	0.668341	-0.420241	0.173995	0.112212
chr4	135505862	135506226	HYPO29562	0.211111	0.511823	-0.300712	0.28842	0.176173
chr4	135660534	135661099	HYPO29572	0.140264	0.600774	-0.46051	0.217369	0.182539
chr4	136007482	136007787	HYPO29602	0.0555557	0.386616	-0.331061	0.317172	0.190227
chr4	136241453	136241671	HYPO29611	0.230842	0.608259	-0.377417	0.547619	0.342649
chr4	136306310	136306874	HYPO29614	0.292849	0.600688	-0.30784	0.472642	0.259194
chr4	136332276	136332896	HYPO29617	0.209369	0.563924	-0.354555	0.279297	0.156125
chr4	136691766	136691950	HYPO29646	0.0985714	0.428889	-0.330317	0.265714	0.253508
chr4	136740532	136740751	HYPO29649	0.180952	0.568254	-0.387302	0.425	0.37132
chr4	137020944	137021605	HYPO29659	0.189072	0.591729	-0.402657	0.430342	0.118005
chr4	137029345	137030297	HYPO29661	0.163881	0.558888	-0.395007	0.45094	0.253035
chr4	137036464	137037434	HYPO29664	0.197215	0.519517	-0.322302	0.362919	0.277759
chr4	137438657	137439004	HYPO29693	0.21195	0.518963	-0.307013	0.419288	0.327352
chr4	138318325	138318486	HYPO29742	0.216021	0.57791	-0.36189	0	0.438889
chr4	138763632	138763785	HYPO29767	0.123737	0.457064	-0.333326	0.311905	0.116583
chr4	139312626	139313077	HYPO29795	0.2	0.525926	-0.325926	0.037037	0.17743
chr4	139314366	139314800	HYPO29796	0.243214	0.742727	-0.499513	0.114949	0.19836
chr4	140173692	140173866	HYPO29851	0.209436	0.554716	-0.34528	0.424942	0.317349
chr4	140190827	140191203	HYPO29854	0.287113	0.601034	-0.313922	0.256905	0.271206
chr4	140244262	140244644	HYPO29862	0.168697	0.50494	-0.336243	0.141803	0.18675
chr4	140563983	140564241	HYPO29884	0.1325	0.436724	-0.304224	0.265	0.215951
chr4	140977469	140977875	HYPO29922	0.197628	0.595953	-0.398325	0.350072	0.190346
chr4	141070316	141070488	HYPO29927	0.22004	0.674841	-0.454801	0.34623	0.176474
chr4	141079154	141079418	HYPO29928	0.142487	0.572428	-0.42994	0.544048	0.464899
chr4	141128953	141129965	HYPO29933	0.186953	0.494156	-0.307203	0.344841	0.291583
chr4	141427839	141428067	HYPO29947	0.214286	0.524438	-0.310152	0.163889	0.293798
chr4	141455771	141456246	HYPO29951	0.145996	0.707318	-0.561323	0.516667	0.291495
chr4	144616380	144616878	HYPO30009	0.141705	0.531111	-0.389406	0.323722	0.116314
chr4	145426778	145426811	HYPO30029	0.166667	0.683333	-0.516667	0.625	0.527116
chr4	145426886	145426932	HYPO30030	0	0.544206	-0.544206	0.28	0.486823
chr4	145586320	145587110	HYPO30031_HYPO28356	0.295238	0.616667	-0.321429	NA	0.7
chr4	146561522	146561698	HYPO30048	0.306997	0.697131	-0.390133	0.529904	0.500061
chr4	147884264	147885110	HYPO30100	0.187229	0.588333	-0.401104	0.441111	0.512099
chr4	148247132	148247244	HYPO30124	0.252381	0.581994	-0.329613	0.561224	0.335859
chr4	148296224	148296411	HYPO30128	0.302857	0.681429	-0.378572	0.648677	0.338158
chr4	148325112	148325609	HYPO30130	0.239787	0.563848	-0.324061	0.259331	0.202897
chr4	148326001	148326097	HYPO30131	0.196148	0.555864	-0.359717	0.487301	0.29555
chr4	148939045	148939310	HYPO30152	0.29464	0.734536	-0.439896	0.482937	0.171529
chr4	149256590	149256800	HYPO30170	0.255128	0.616396	-0.361268	0.73851	0.228464
chr4	149340305	149340631	HYPO30177	0.242725	0.550449	-0.307725	0.281439	0.343003
chr4	149594840	149595073	HYPO30202	0.0782052	0.378732	-0.300526	0.100198	0.072056
chr4	150081089	150082158	HYPO30224	0.183411	0.496676	-0.313266	0.231487	0.196805
chr4	150263723	150264377	HYPO30236	0.226732	0.532658	-0.305926	0.310537	0.179704
chr4	150910168	150910431	HYPO30273	0.251355	0.626174	-0.374819	0.376871	0.357068
chr4	151000203	151000356	HYPO30277	0.290533	0.725965	-0.435432	0.440334	0.344292
chr4	151646533	151647106	HYPO30314	0.162875	0.46337	-0.300495	0.204473	0.150849
chr4	152065282	152065389	HYPO30341	0.191837	0.727272	-0.535436	NA	0.436667
chr4	153767740	153768260	HYPO30397	0.174058	0.477324	-0.303267	0.413449	0.274083
chr4	153880958	153881309	HYPO30404	0.147731	0.504474	-0.356743	0.207873	0.122143
chr4	153901765	153901994	HYPO30405	0.16941	0.529979	-0.360569	0.0918367	0.234419
chr4	154017317	154017957	HYPO30411	0.176232	0.508333	-0.332101	0.46002	0.177579
chr4	154146026	154146116	HYPO30415	0.25457	0.591575	-0.337006	0.199259	0.349702
chr4	154285137	154285404	HYPO30427	0.172248	0.532699	-0.360451	0.290505	0.171796
chr4	154508131	154508522	HYPO30448	0.276284	0.683078	-0.406794	0.448072	0.338067
chr4	154538247	154539110	HYPO30454	0.237627	0.593173	-0.355546	0.442328	0.298596
chr4	154641175	154641617	HYPO30464	0.177778	0.478788	-0.30101	0.194286	0.148214
chr5	7917644	7918434	HYPO30550	0.260231	0.57217	-0.311939	0.438043	0.246483
chr5	14092344	14092710	HYPO30577	0.224403	0.53292	-0.308517	0.175298	0.245139
chr5	16159888	16160105	HYPO30590	0.110765	0.419434	-0.308669	0.322052	0.191356
chr5	20645293	20645849	HYPO30608	0.137624	0.510744	-0.37312	0.140587	0.358558
chr5	20650313	20650582	HYPO30609	0.186237	0.495284	-0.309047	0.18579	0.128658
chr5	20806560	20807155	HYPO30612	0.277778	0.609177	-0.3314	0.286667	0.255897
chr5	20887516	20888001	HYPO28929_HYPO30614	0.19881	0.562271	-0.363462	0.322222	0.329293
chr5	23368116	23368579	HYPO30651	0.132778	0.498025	-0.365247	0.289773	0.254896
chr5	24098483	24098583	HYPO30691	0.254082	0.669326	-0.415244	0.452761	0.40202
chr5	24263687	24263777	HYPO30701	0.263426	0.665598	-0.402172	0.390013	0.395771
chr5	24572963	24573377	HYPO30711	0.155159	0.514286	-0.359127	0.121587	0.13992
chr5	30764353	30764513	HYPO30769	0.138889	0.523148	-0.384259	0.339484	0.290509
chr5	31180948	31181419	HYPO30788	0.245475	0.57124	-0.325765	0.186424	0.294
chr5	31556793	31557136	HYPO30813	0.0791784	0.505102	-0.425924	0.240759	0.248324
chr5	32443509	32443931	HYPO30829	0.293732	0.610691	-0.316959	0.377866	0.439791
chr5	32574953	32575237	HYPO30833	0.221429	0.538738	-0.31731	0.238095	0.442343
chr5	34032197	34032323	HYPO30878	0.145833	0.65	-0.504167	0.825	0.431667
chr5	34908119	34908798	HYPO30902	0.18051	0.504578	-0.324069	0.052381	0.193835
chr5	35316125	35316832	HYPO30909	0.161632	0.517785	-0.356152	0.254613	0.351323
chr5	36014251	36014481	HYPO30935	0.0844697	0.464286	-0.379816	0.188161	0.176171
chr5	36061490	36061704	HYPO30939	0.237662	0.733622	-0.49596	0.483694	0.335404
chr5	36086064	36086586	HYPO30941	0.175356	0.584226	-0.40887	0.444733	0.402774
chr5	36635998	36636383	HYPO30951	0.123504	0.504487	-0.380983	0.439484	0.400736
chr5	37482184	37483088	HYPO30988_HYPO29280	0.0423886	0.403123	-0.360735	0.228248	0.0971299
chr5	44038487	44038852	HYPO31047	0.324276	0.716661	-0.392385	0.653648	0.430011
chr5	46424229	46424715	HYPO31079	0.183665	0.56221	-0.378546	0.31887	0.126748
chr5	47631239	47632204	HYPO31082	0.239955	0.569526	-0.329571	0.240893	0.268301
chr5	52741844	52743268	HYPO31106	0.241741	0.544742	-0.303001	0.352619	0.528923
chr5	53547020	53547528	HYPO31124	0.275849	0.646873	-0.371024	0.618117	0.498837
chr5	54271660	54272164	HYPO31144	0.137567	0.6253	-0.487734	0.227384	0.212166
chr5	61547475	61547625	HYPO31159	0.109445	0.410588	-0.301144	0.154652	0.181288
chr5	63063887	63064472	HYPO31160	0.181479	0.609626	-0.428146	0.401729	0.264174
chr5	64687668	64688000	HYPO31179	0.154486	0.649666	-0.49518	0.245635	0.10348
chr5	64750259	64750444	HYPO31182	0.283481	0.705334	-0.421854	0.25291	0.361528
chr5	65549144	65549494	HYPO31211	0.254232	0.686776	-0.432544	0.239374	0.282761
chr5	66938487	66938794	HYPO31242	0.250308	0.685026	-0.434717	0.342531	0.243077
chr5	67370759	67371155	HYPO31256	0.262637	0.678551	-0.415913	0.32316	0.274572
chr5	67596558	67596790	HYPO31260	0.239664	0.607033	-0.36737	0.45865	0.620459
chr5	73957979	73958423	HYPO31311	0.250433	0.636247	-0.385814	0.412076	0.551968
chr5	74445131	74445349	HYPO31318	0.309432	0.709292	-0.39986	0.24915	0.411565
chr5	75442494	75443319	HYPO31346	0.189222	0.539161	-0.349939	0.23998	0.184255
chr5	75504864	75505668	HYPO31351	0.280978	0.717407	-0.436429	0.480404	0.415719
chr5	76266941	76267087	HYPO31362	0.317805	0.706635	-0.388831	0.581602	0.557935
chr5	77131862	77132065	HYPO31381	0.202083	0.583333	-0.38125	0	0.449779
chr5	93033915	93034164	HYPO31496	0.256902	0.584885	-0.327982	0.458484	0.315547
chr5	93362407	93362693	HYPO31506	0.207008	0.555139	-0.348131	0.218254	0.235022
chr5	99768721	99769526	HYPO29847_HYPO31568	0.136659	0.452665	-0.316005	0.221774	0.216966
chr5	100459122	100459368	HYPO31581	0.180965	0.671563	-0.490598	0.194048	0.176616
chr5	100476852	100477169	HYPO31583	0.0951048	0.577117	-0.482013	0.311971	0.161586
chr5	100512943	100513397	HYPO31585	0.189201	0.635729	-0.446528	0.259199	0.19909
chr5	101034860	101035474	HYPO31603	0.263444	0.610662	-0.347218	0.507029	0.3837
chr5	103222511	103222951	HYPO31638	0.242902	0.687098	-0.444196	0.487311	0.447652
chr5	104008727	104009089	HYPO31651	0.0333334	0.406818	-0.373485	0.248214	0.205556
chr5	104166623	104166698	HYPO31656	0.172071	0.670237	-0.498167	0.474286	0.0730303
chr5	104201453	104202484	HYPO31659	0.0883022	0.451628	-0.363326	0.123547	0.108601
chr5	104894850	104895047	HYPO31681	0.298794	0.802684	-0.50389	0.769569	0.764597
chr5	105896289	105896537	HYPO31691	0.204117	0.75982	-0.555703	0.78869	0.524535
chr5	105906671	105906887	HYPO31692	0.16756	0.551301	-0.383742	0.395791	0.325541
chr5	105956936	105957213	HYPO31695	0.222561	0.665671	-0.44311	0.33507	0.270523
chr5	106031768	106031899	HYPO31697	0.192527	0.577106	-0.384579	0.212698	0.0972222
chr5	106151895	106152043	HYPO31704	0.125458	0.480375	-0.354917	0.284343	0.380151
chr5	106190823	106191393	HYPO31706	0.213831	0.597825	-0.383994	0.20588	0.184545
chr5	106207916	106208805	HYPO31707	0.200726	0.538578	-0.337852	0.263492	0.370509
chr5	106216724	106217048	HYPO31708	0.162785	0.515741	-0.352956	0.344865	0.218326
chr5	107418863	107419096	HYPO31736	0.293091	0.713526	-0.420435	0.449306	0.402043
chr5	107504192	107504372	HYPO31740	0.26734	0.569826	-0.302486	0.166667	0.351017
chr5	107545728	107546325	HYPO31745	0.238666	0.597558	-0.358892	0.359668	0.32005
chr5	107667098	107667649	HYPO31757	0.190201	0.545867	-0.355666	0.210928	0.263708
chr5	108426390	108427390	HYPO31776	0.163211	0.500311	-0.3371	0.18372	0.291515
chr5	108444472	108444835	HYPO31778	0.170139	0.502778	-0.332639	0.0277778	0.180999
chr5	110779427	110779809	HYPO31815	0.300519	0.644739	-0.34422	0.394518	0.453634
chr5	111656962	111657682	HYPO31842	0.267149	0.568215	-0.301067	0.259048	0.191978
chr5	111672627	111672913	HYPO31843	0.269053	0.598157	-0.329105	0.475132	0.491554
chr5	111676428	111677265	HYPO31844	0.232207	0.60187	-0.369663	0.323927	0.294139
chr5	111837878	111838952	HYPO31849	0.186309	0.616574	-0.430265	0.5	0.258221
chr5	111889806	111889963	HYPO31853	0.255525	0.575469	-0.319944	0.371032	0.364683
chr5	111960018	111960630	HYPO31857_HYPO30105	0.0472348	0.391476	-0.344241	0.0712522	0.0589973
chr5	111989339	111989749	HYPO31860	0.132012	0.535714	-0.403702	0.359884	0.188262
chr5	112030871	112031047	HYPO31864	0.186508	0.5	-0.313492	0.7	0.308291
chr5	112048762	112049929	HYPO31865	0.122046	0.46382	-0.341774	0.268254	0.279497
chr5	112672772	112673142	HYPO31896	0.110611	0.54458	-0.433969	0.123214	0.31256
chr5	112718097	112718574	HYPO31902	0.163257	0.538095	-0.374838	0.134673	0.136796
chr5	112721559	112721720	HYPO31903	0.0192308	0.398529	-0.379299	0.22803	0.318869
chr5	112811190	112812250	HYPO31907	0.282427	0.613912	-0.331486	0.427997	0.421709
chr5	113036994	113037437	HYPO31922	0.155957	0.48676	-0.330803	0.276353	0.281754
chr5	113537156	113537653	HYPO31945	0.257777	0.56939	-0.311613	0.489715	0.369572
chr5	113626445	113626925	HYPO31960	0.240545	0.54614	-0.305595	0.304924	0.188387
chr5	113647751	113648096	HYPO31963	0.21312	0.613078	-0.399959	0.398748	0.295745
chr5	113709487	113709869	HYPO31967	0.278282	0.686021	-0.407739	0.216964	0.25222
chr5	114110840	114111240	HYPO31996	0.146454	0.517537	-0.371082	0.381865	0.27684
chr5	114322713	114324042	HYPO32018_HYPO30264	0.198192	0.562098	-0.363905	0.131085	0.201738
chr5	114339217	114340114	HYPO32021_HYPO30267	0.161064	0.550876	-0.389811	0.151018	0.135736
chr5	114340769	114341431	HYPO32022	0.255365	0.657027	-0.401662	0.15945	0.41575
chr5	114424725	114425093	HYPO32029	0.249791	0.605749	-0.355958	0.313333	0.342675
chr5	114587731	114588422	HYPO32040	0.316865	0.739666	-0.422801	0.398718	0.316323
chr5	114589173	114589601	HYPO32041	0.216285	0.53084	-0.314555	0.107702	0.215508
chr5	114629520	114629790	HYPO32046	0.112135	0.683225	-0.57109	0.456389	0.415822
chr5	115243447	115243757	HYPO32089	0.224176	0.570516	-0.34634	0.459091	0.164217
chr5	115950514	115950748	HYPO32149	0.0385234	0.362156	-0.323632	0.211816	0.0925894
chr5	116750796	116751317	HYPO32184	0.19331	0.502132	-0.308821	0.362995	0.162963
chr5	117259537	117259597	HYPO32204	0.177078	0.546424	-0.369346	0.321587	0.358963
chr5	117798396	117798638	HYPO32223	0.265343	0.639295	-0.373953	0.405151	0.414583
chr5	117820400	117820910	HYPO32226	0.158996	0.617064	-0.458068	0.350567	0.243585
chr5	118123647	118124232	HYPO32238	0.315867	0.66039	-0.344522	0.537619	0.505102
chr5	118539246	118539578	HYPO32255	0.281615	0.631548	-0.349932	0.516565	0.459943
chr5	118593137	118594147	HYPO32256	0.237209	0.555392	-0.318183	0.164787	0.157693
[truncated: 800 more rows]
