# Supplementary figures and images for: Constitutive loss of DNMT3A causes morbid obesity through misregulation of adipogenesis
Source: eLife journal article supplement (doi:10.7554/elife.72359), 2022-05-13

WAT from mice following lipolysis

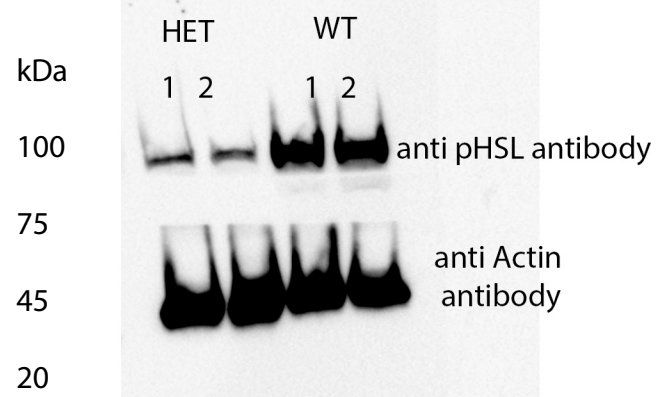

Supplement: fig6-figsupp1-data1 [file HSL_pHSL_WAT annotated.pdf › souce_supp_fig6D/HSL_pHSL_WAT annotated.pdf]
